# Supplementary material for: A modular transcriptome map of mature B cell lymphomas
Source: Springer Nature journal article supplement (doi:10.1186/s13073-019-0637-7), 2019-04-30

intermediate

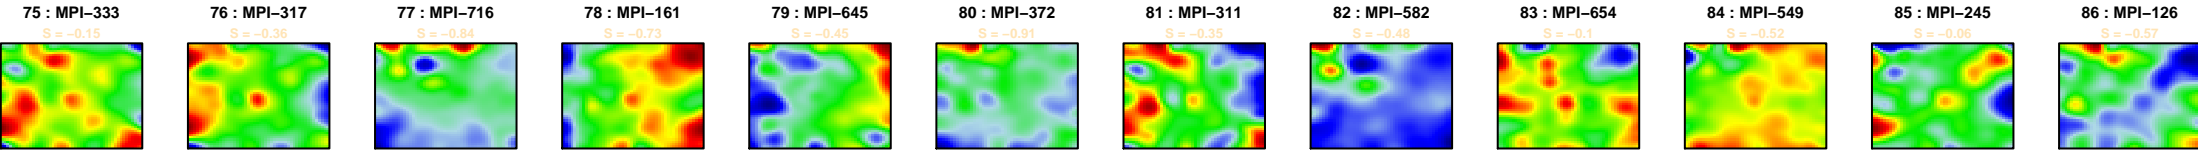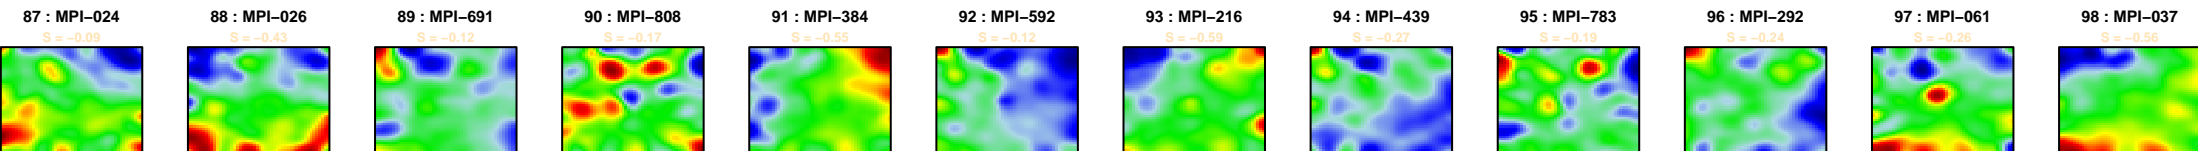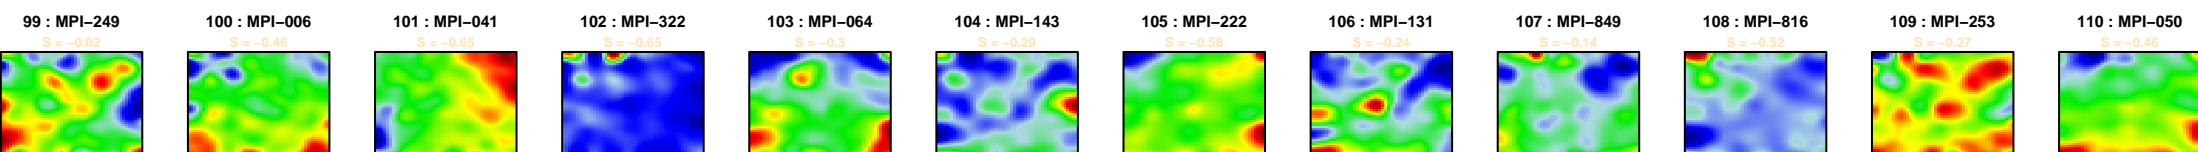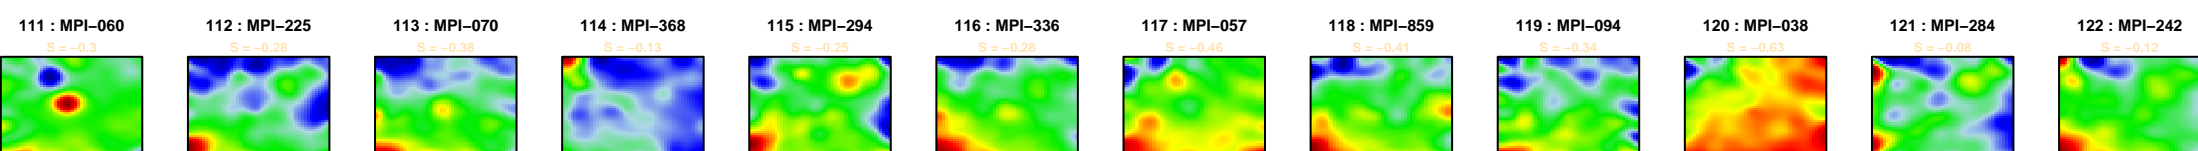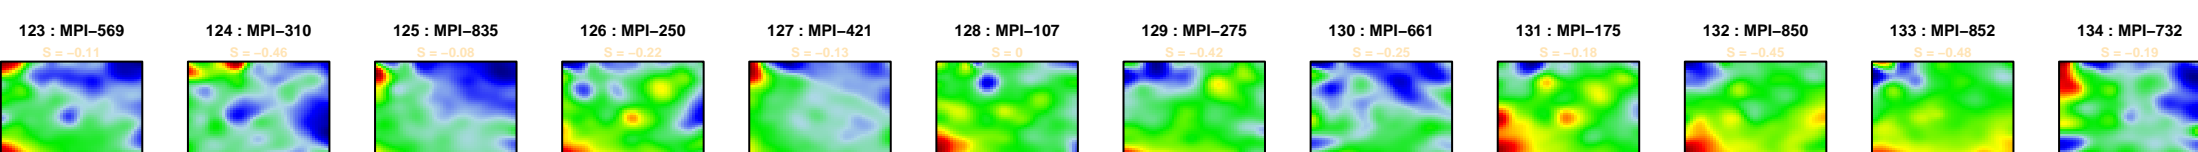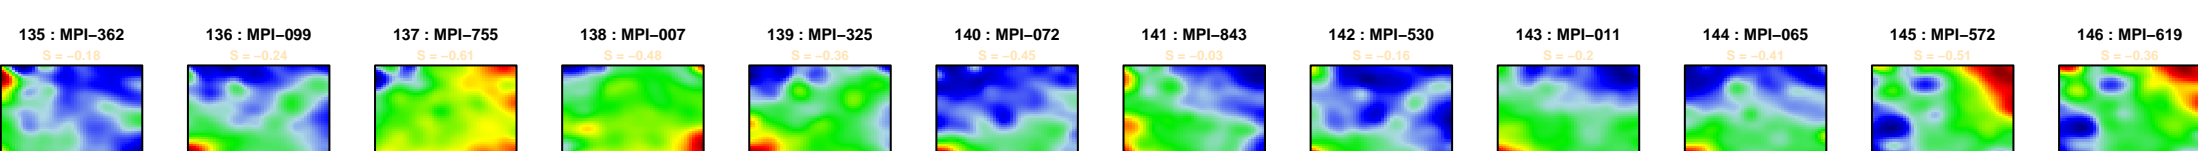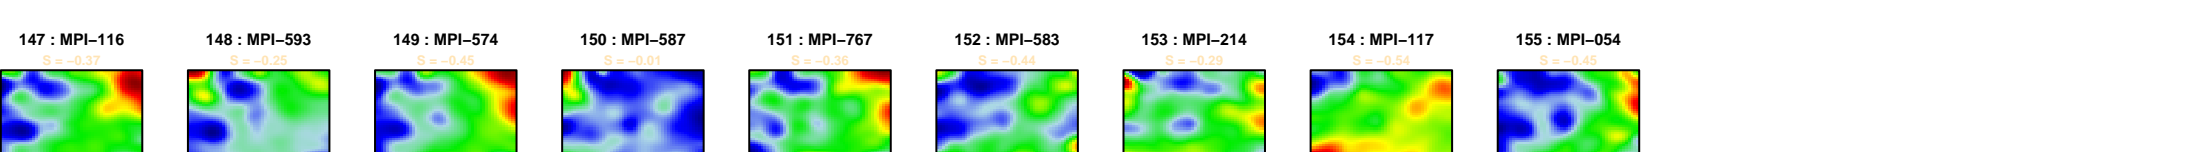

# DLBCL

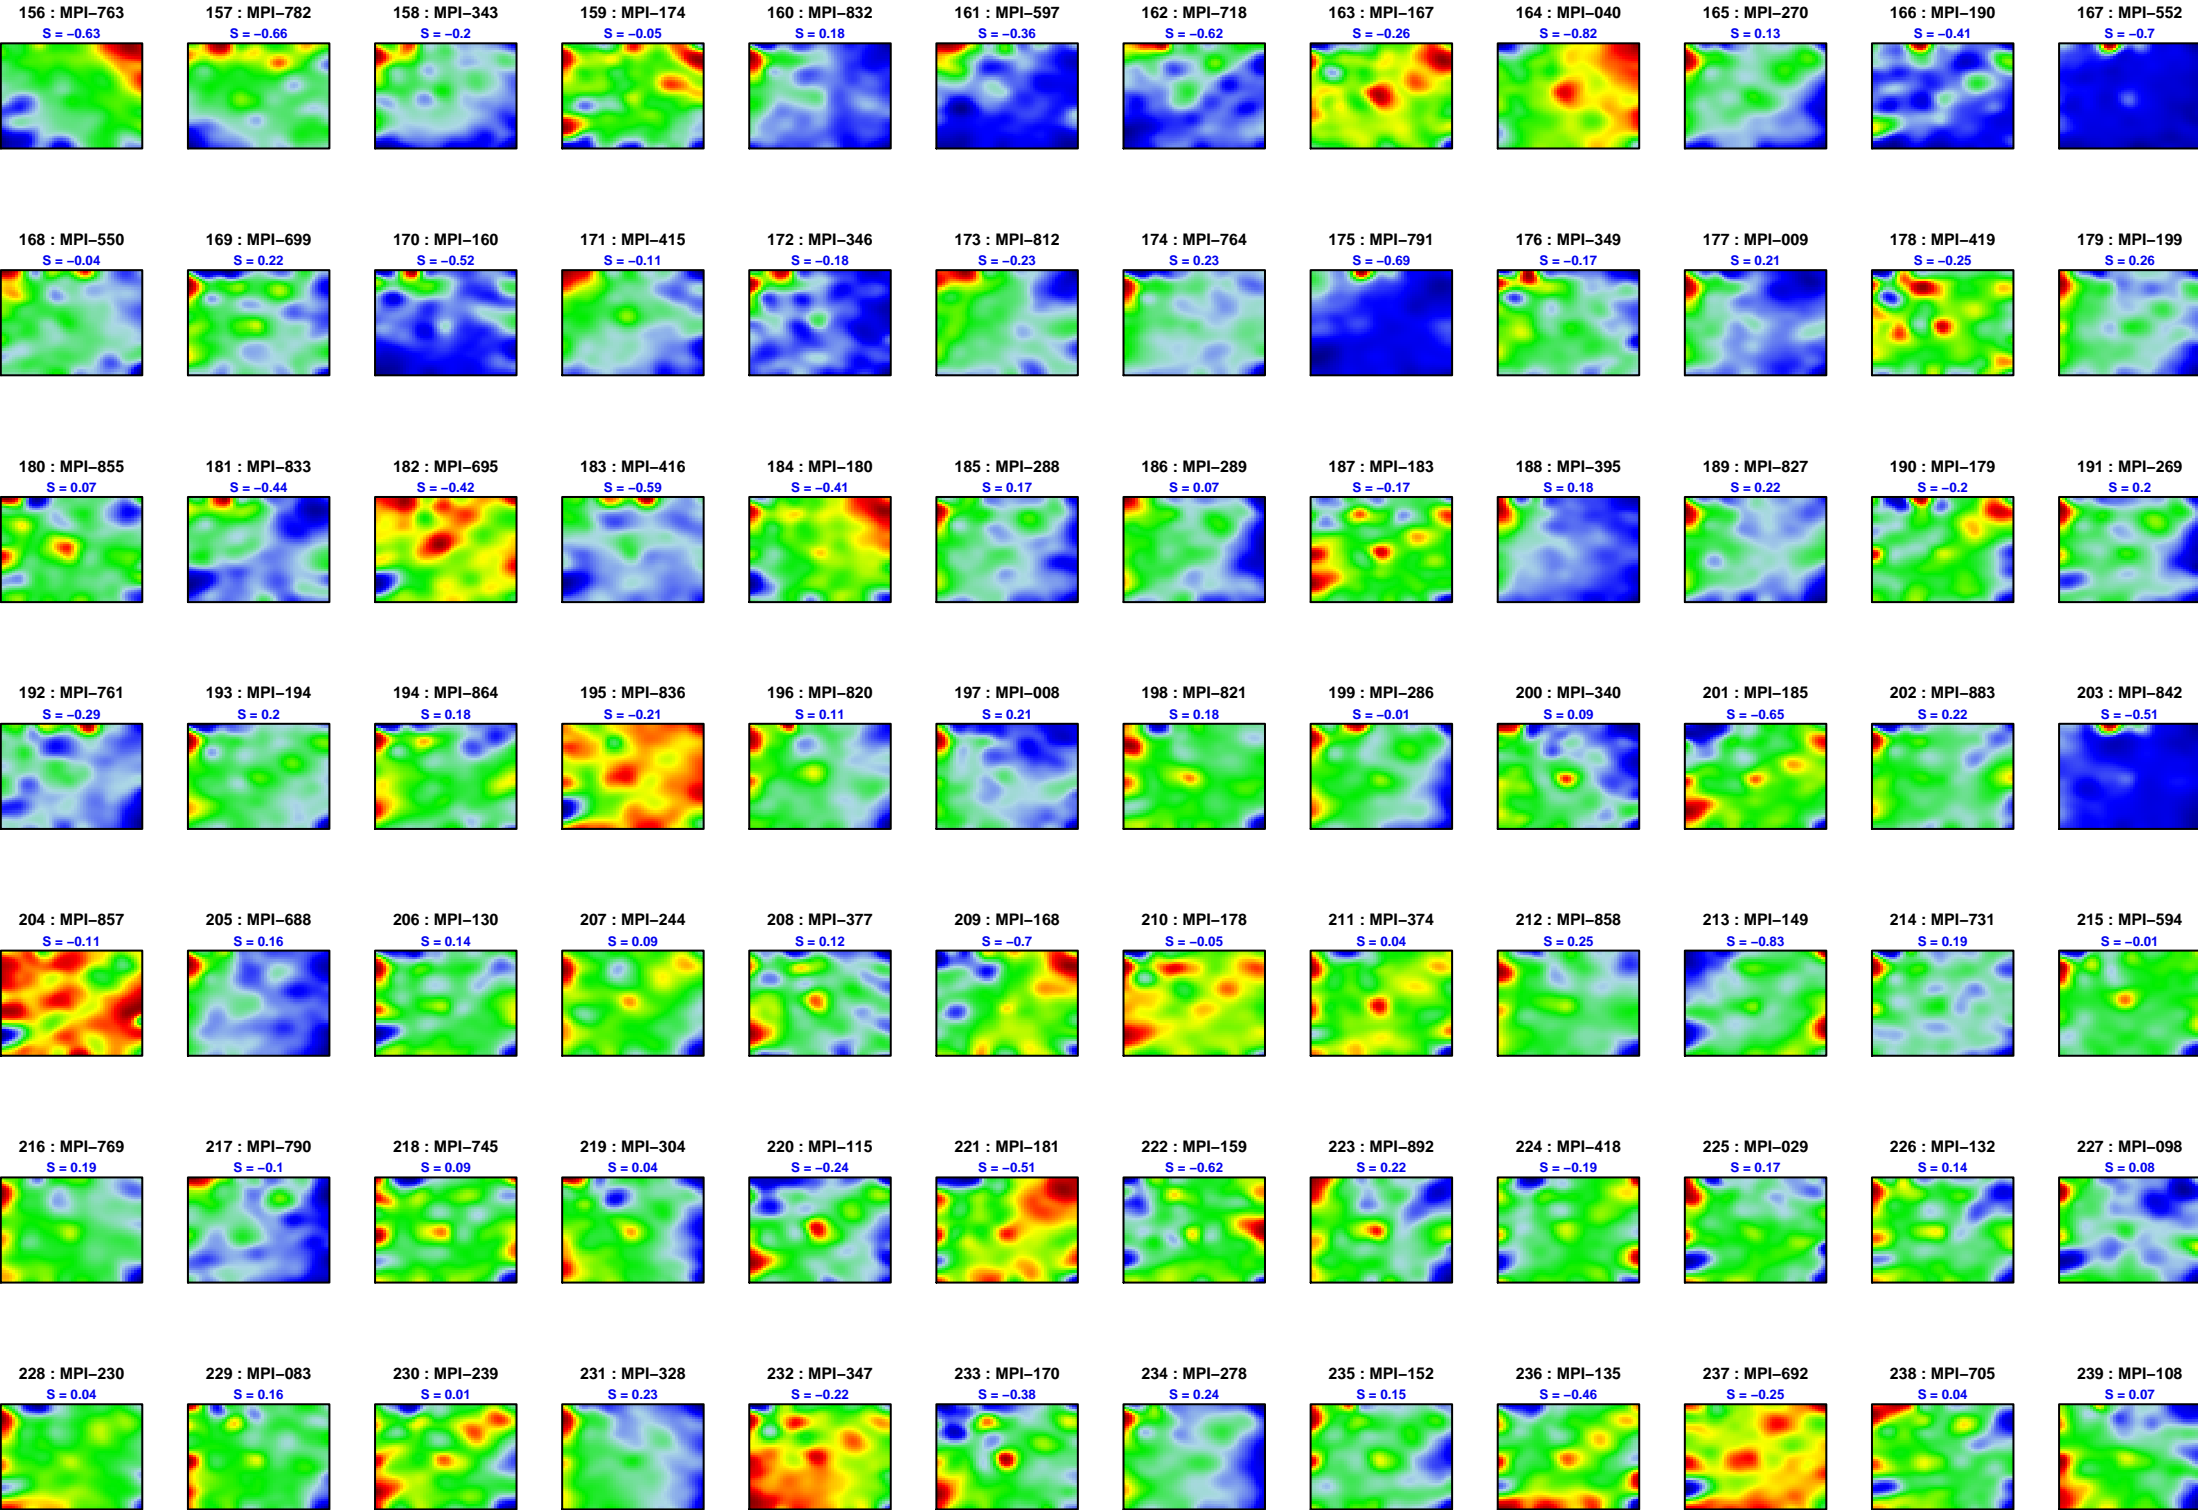

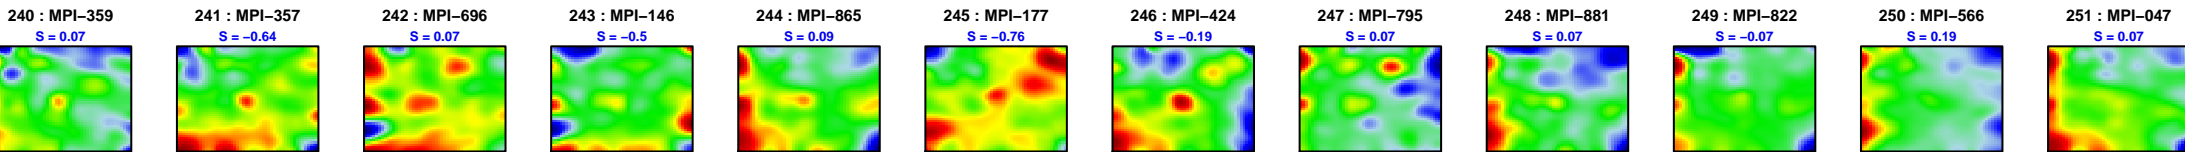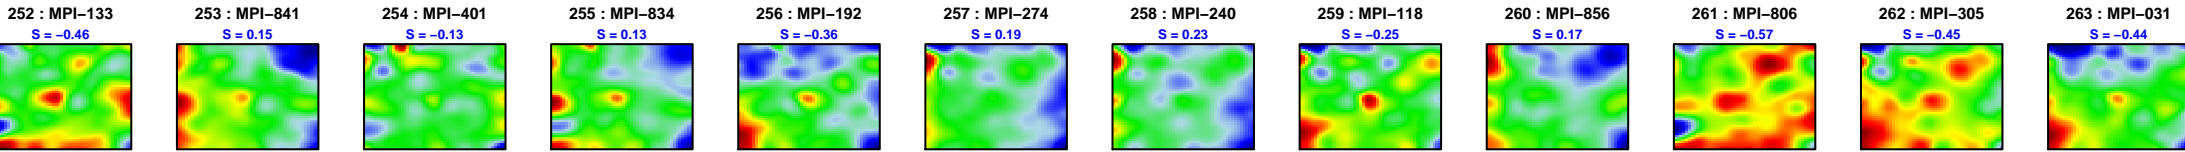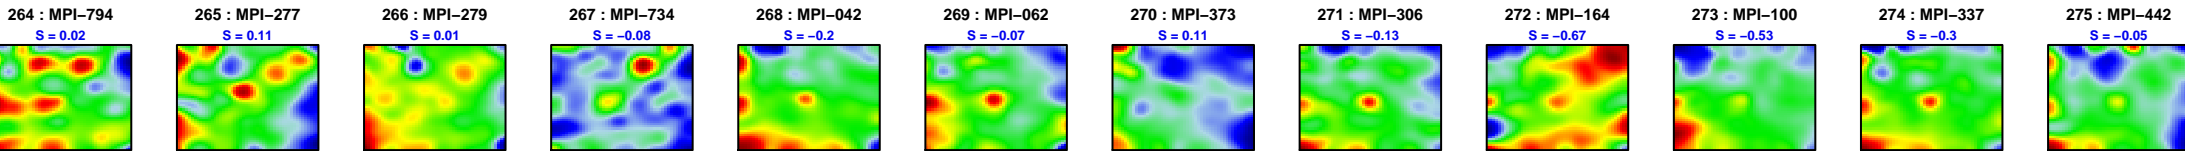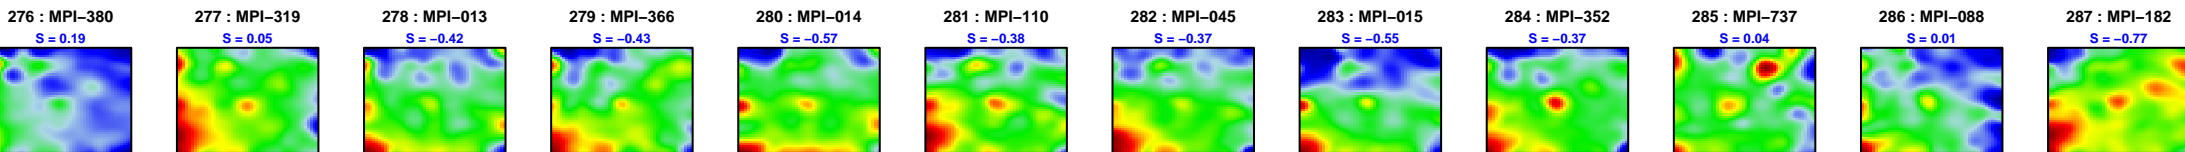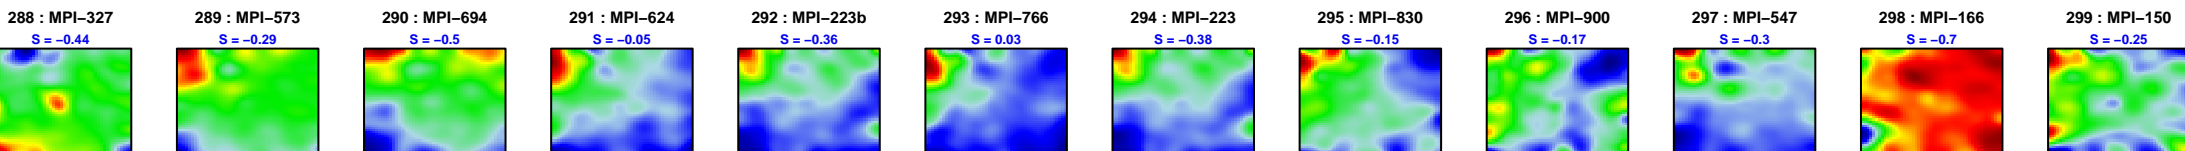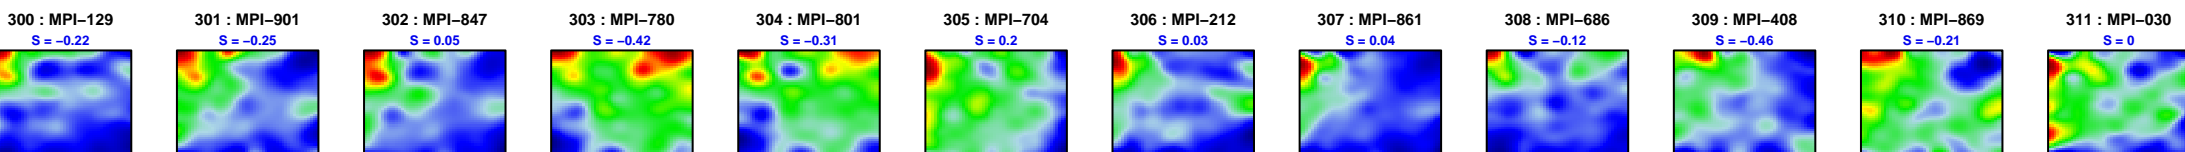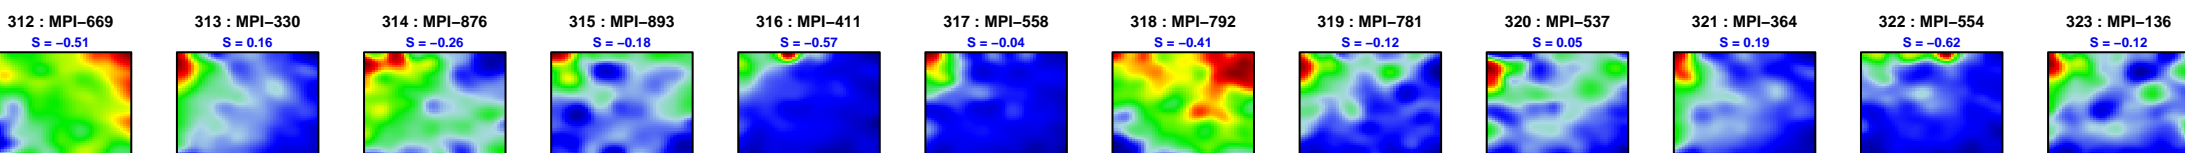

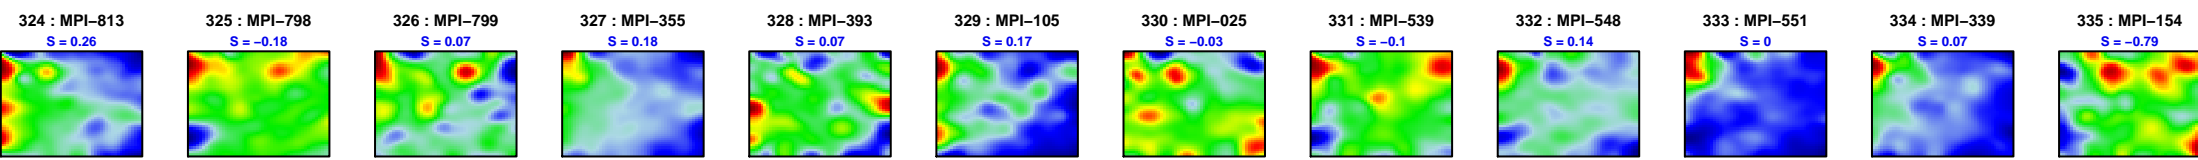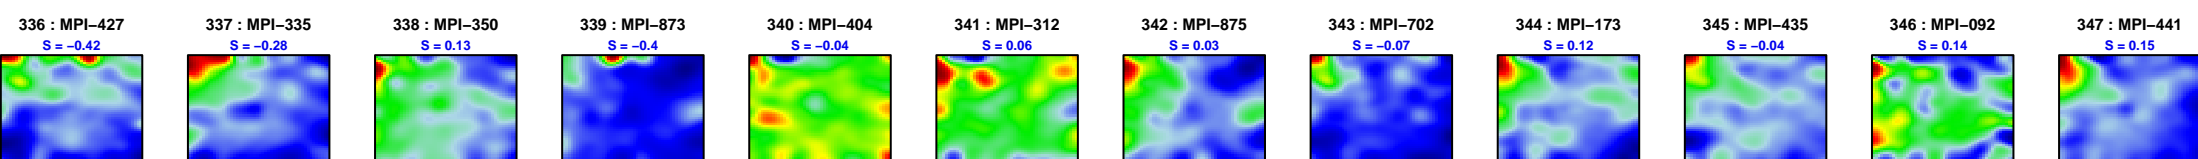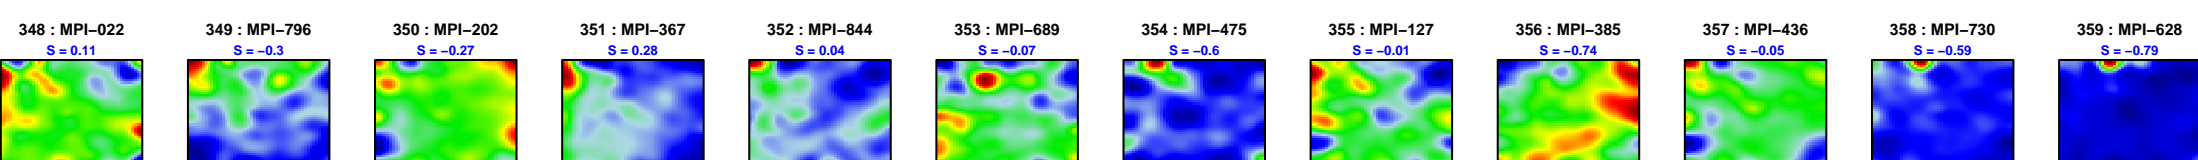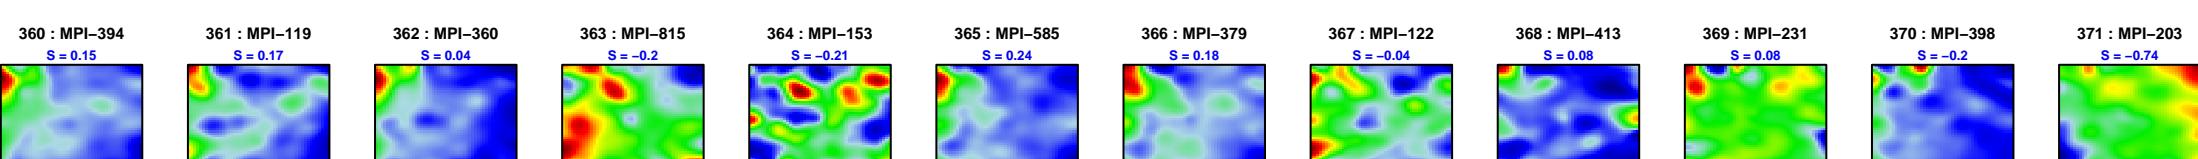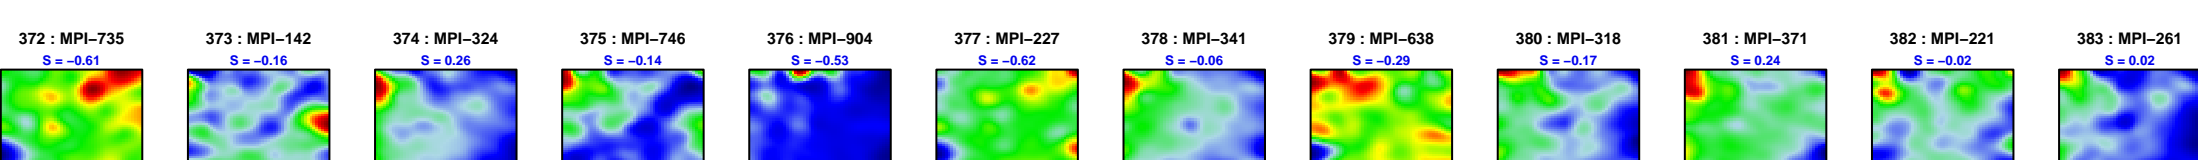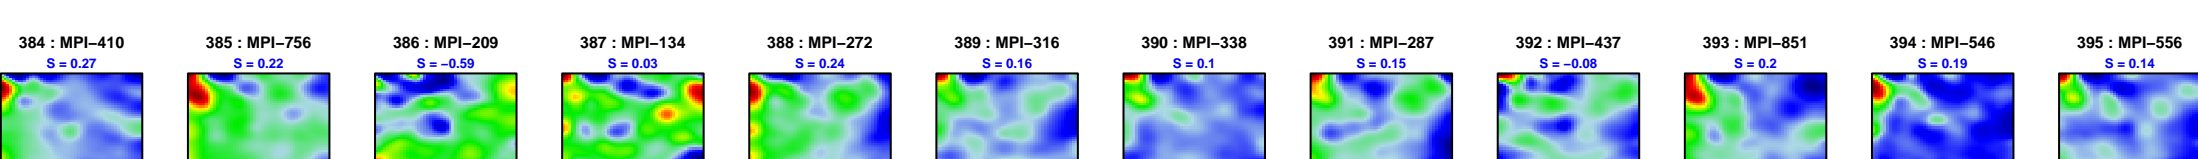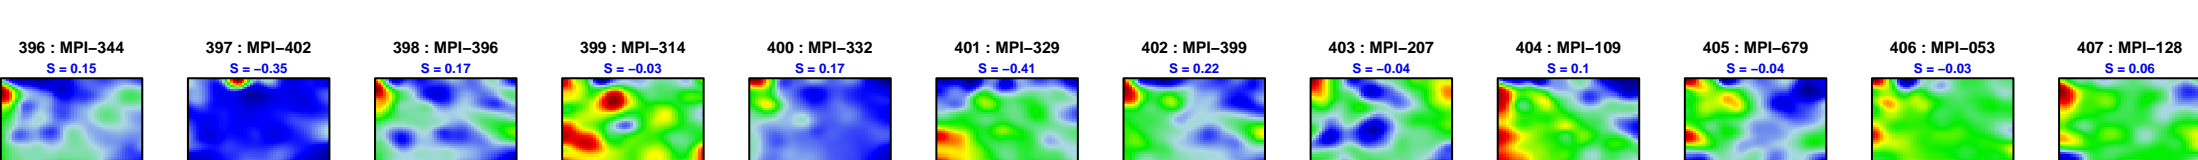

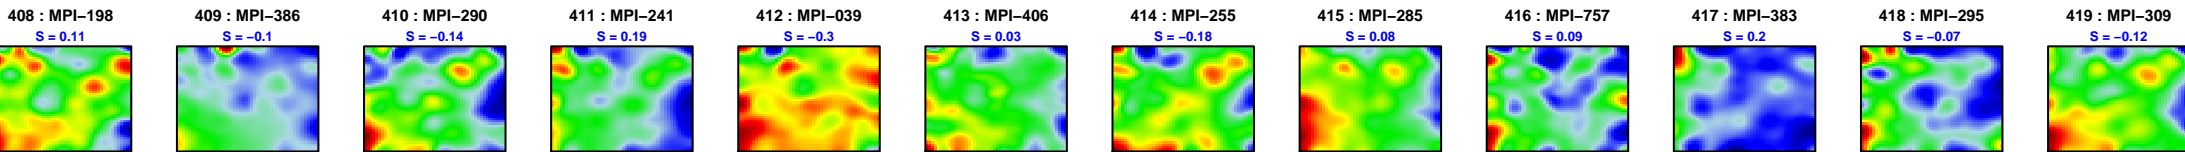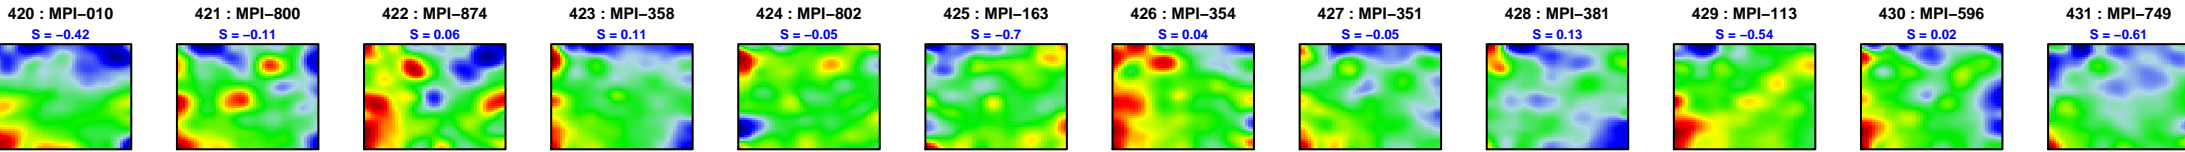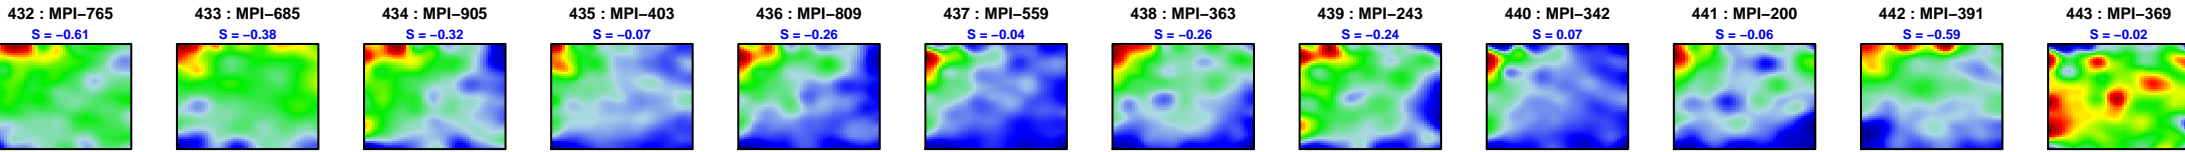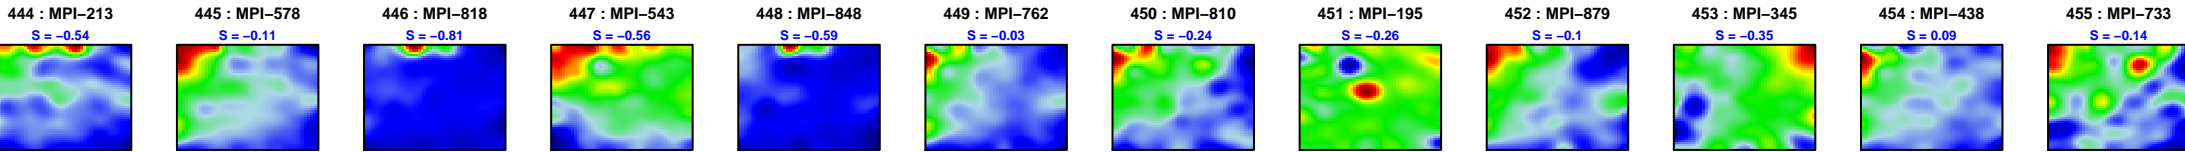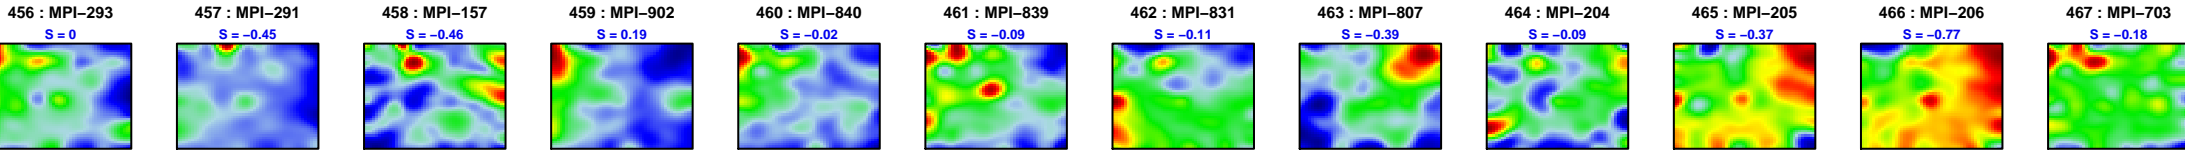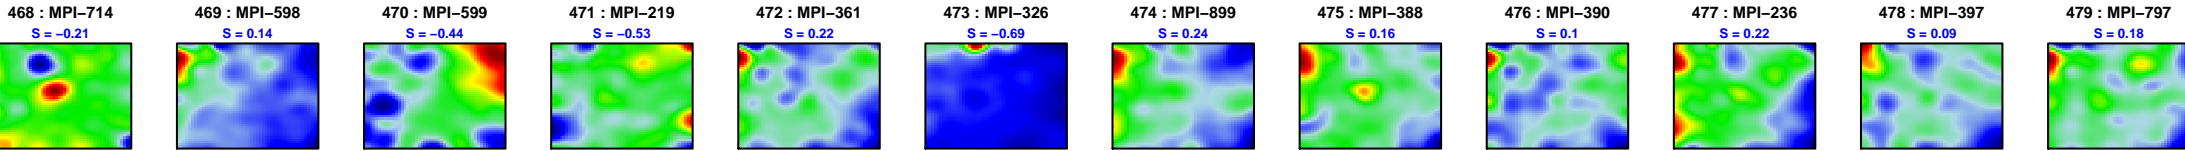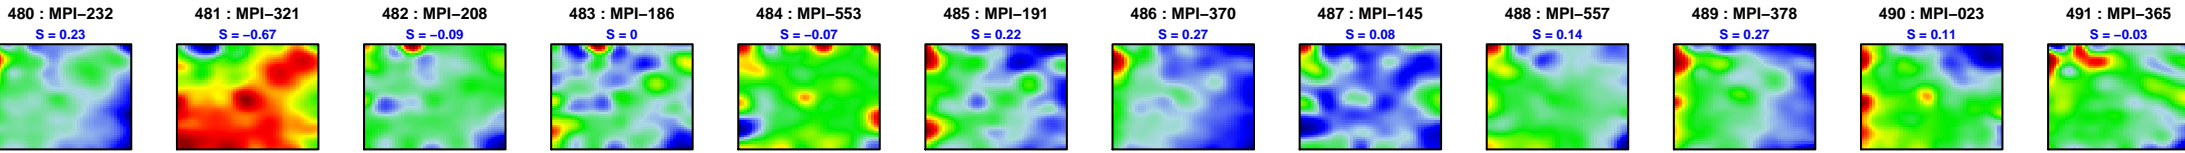

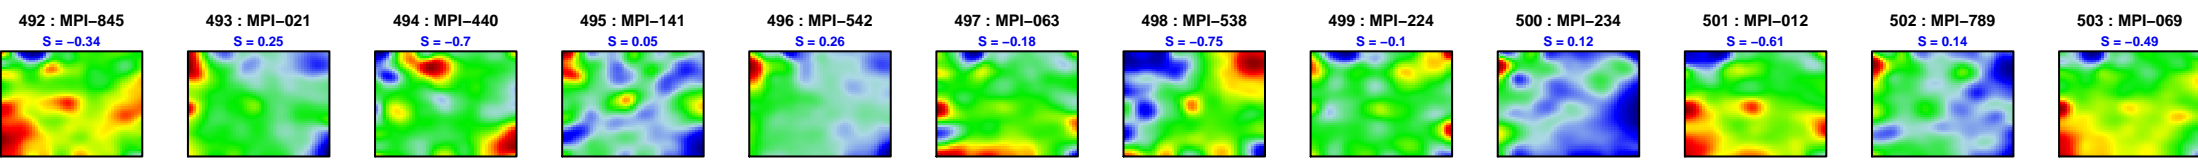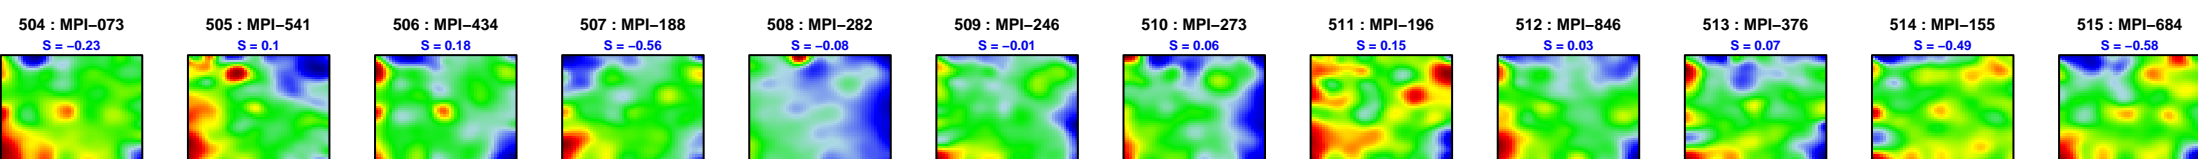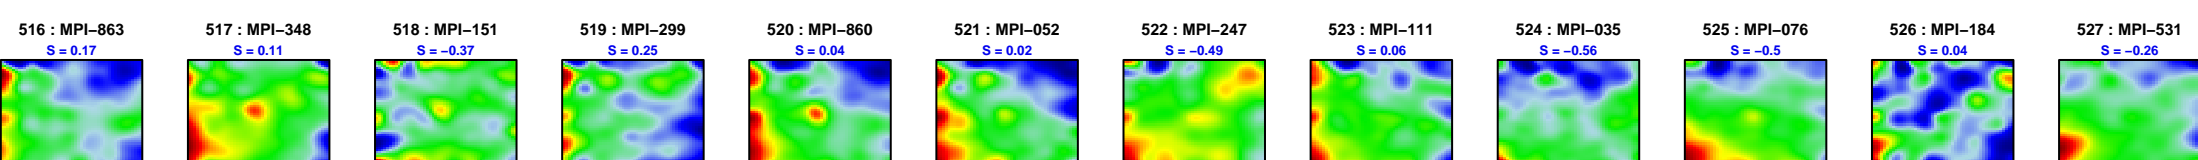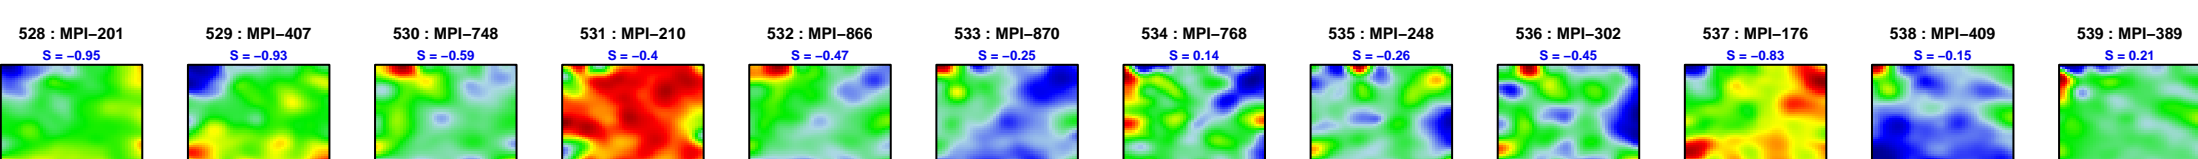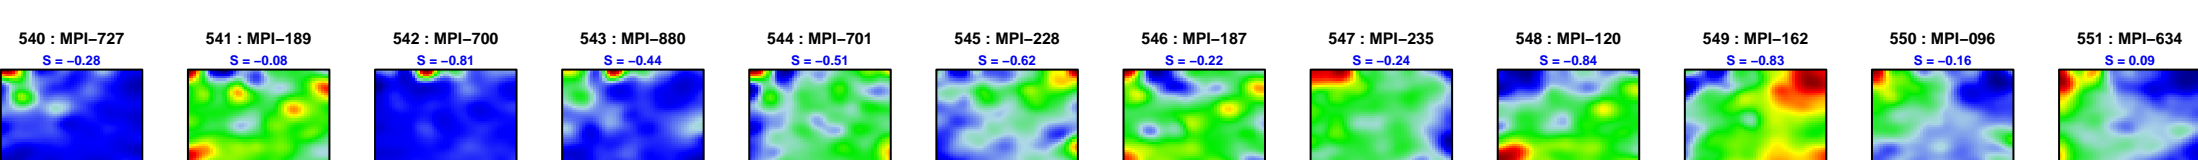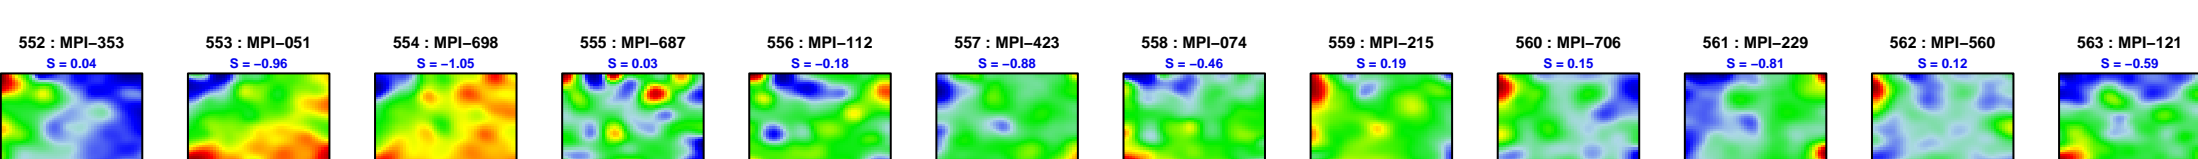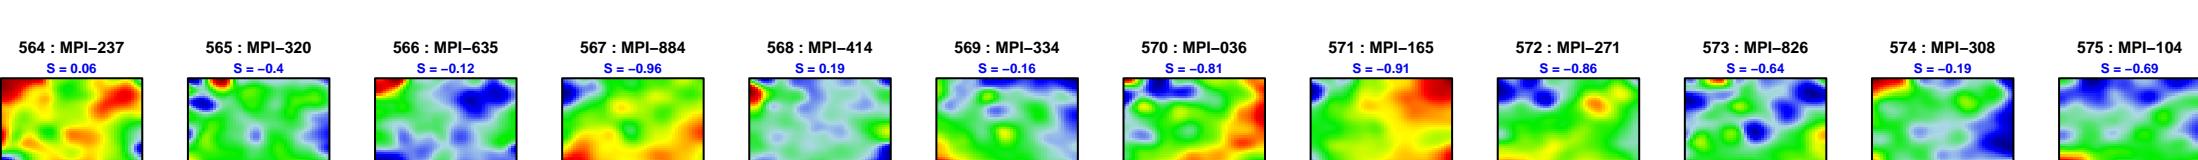

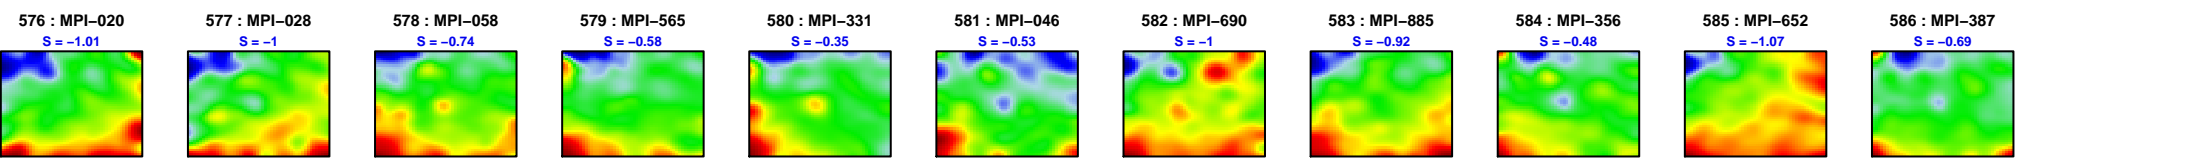

*FL/DLBCL*

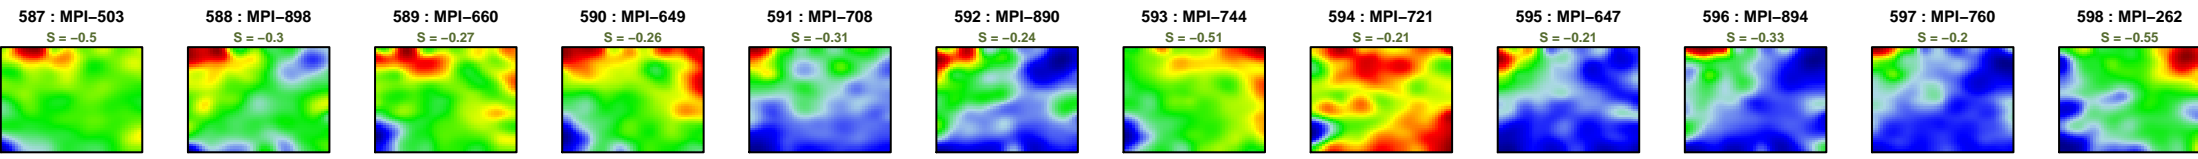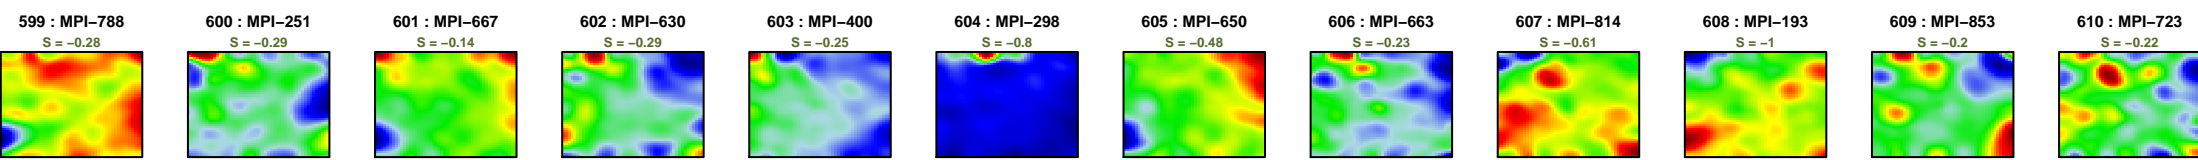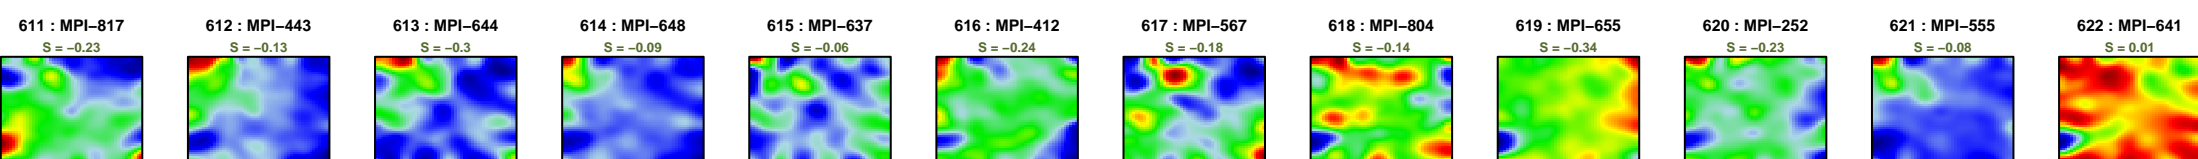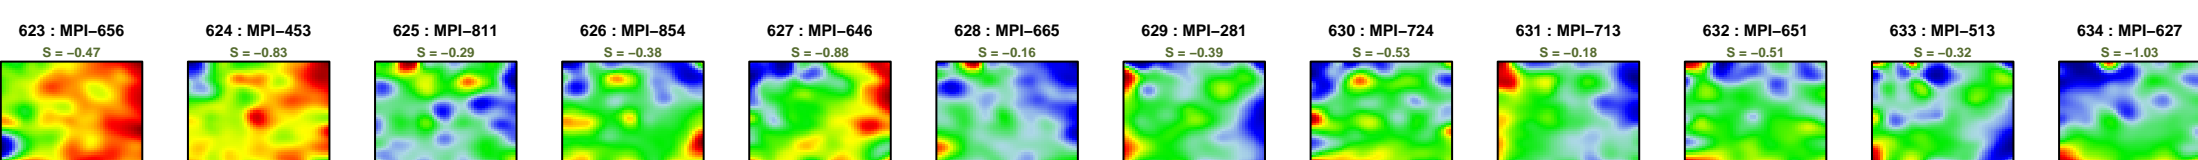

*FL*

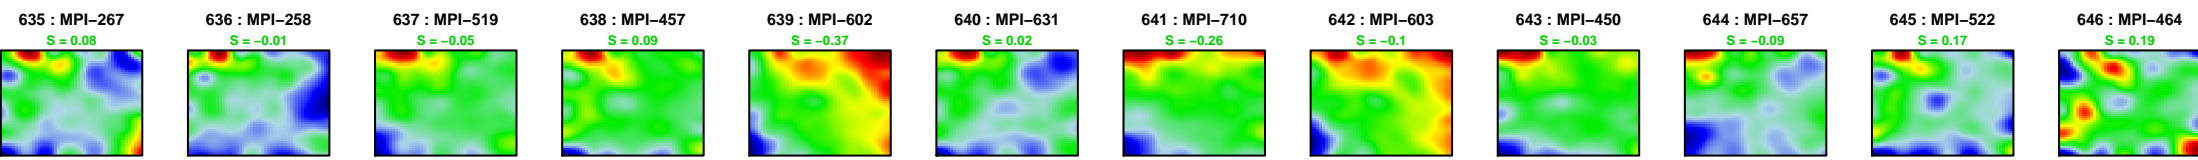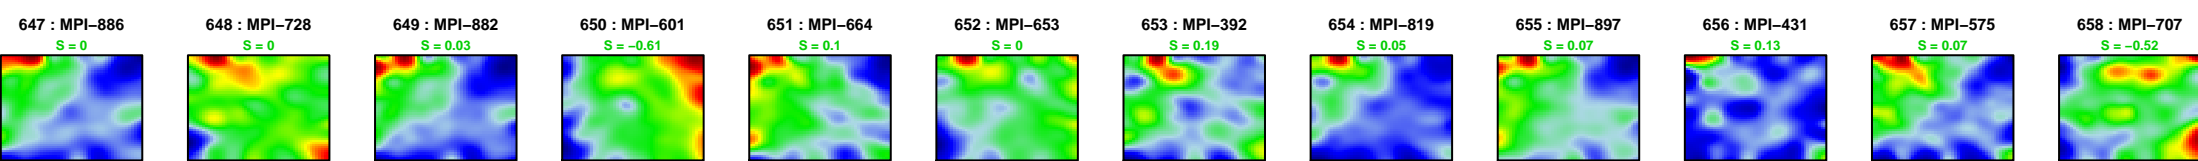



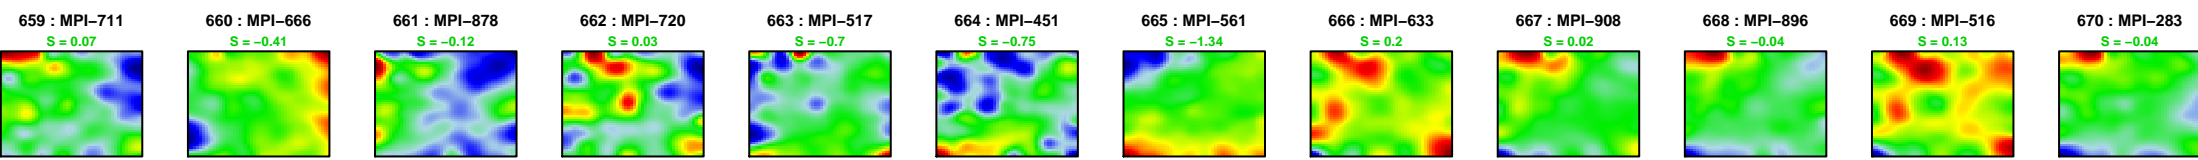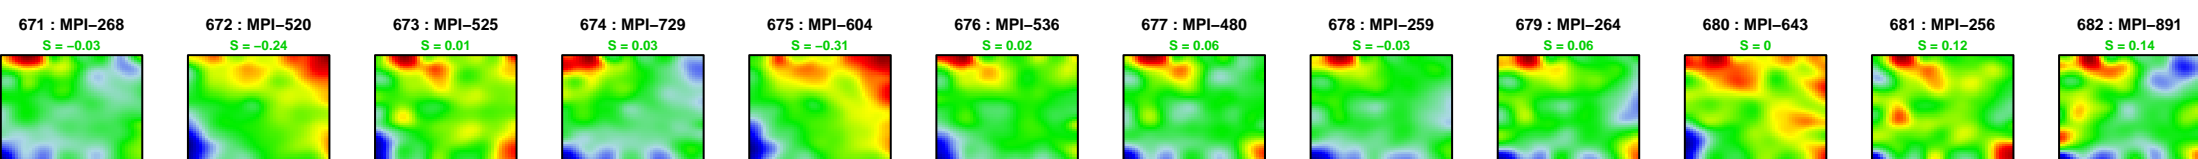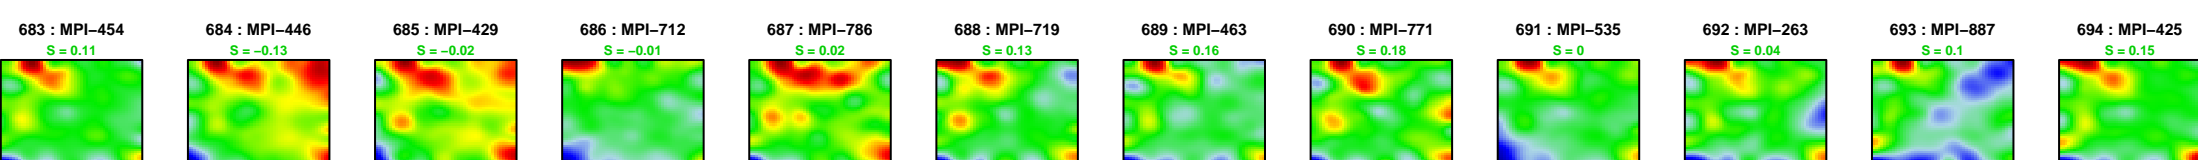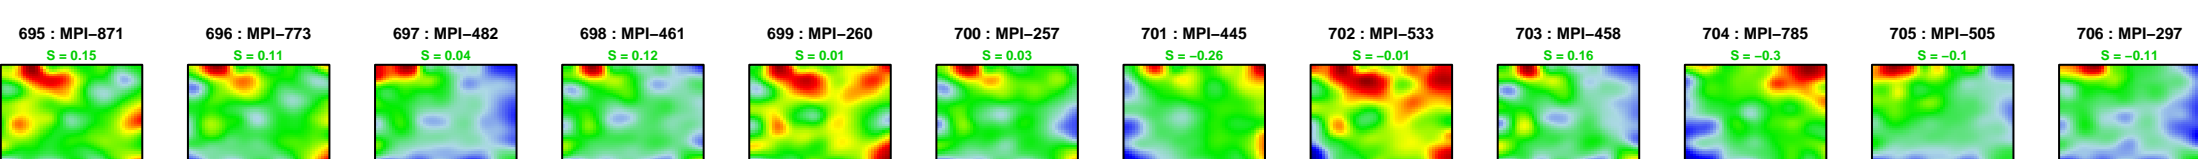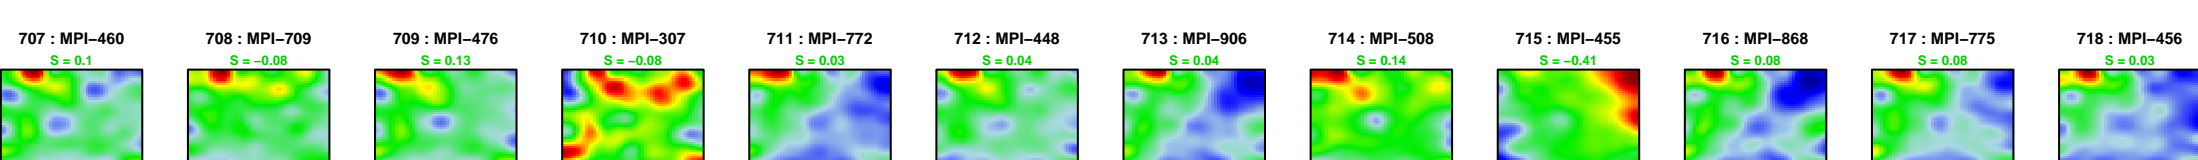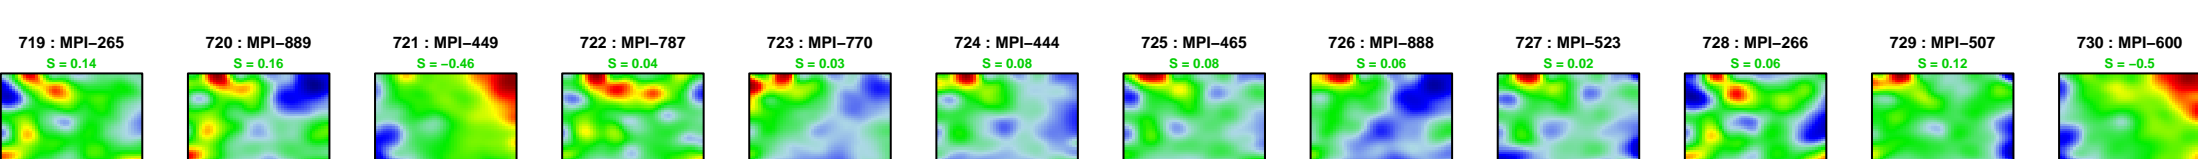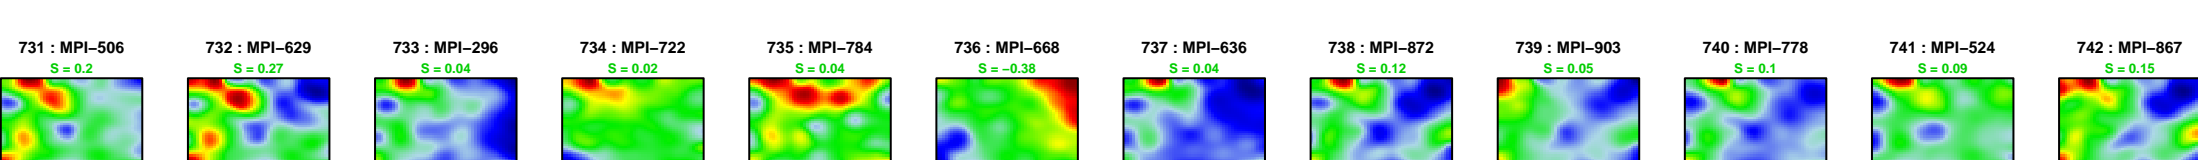

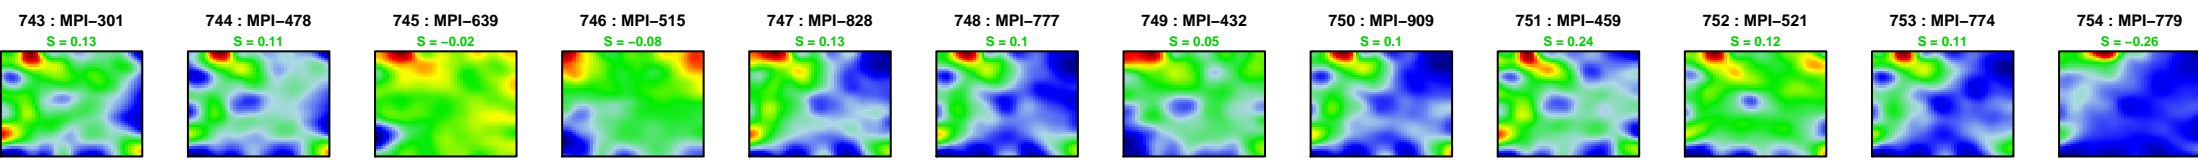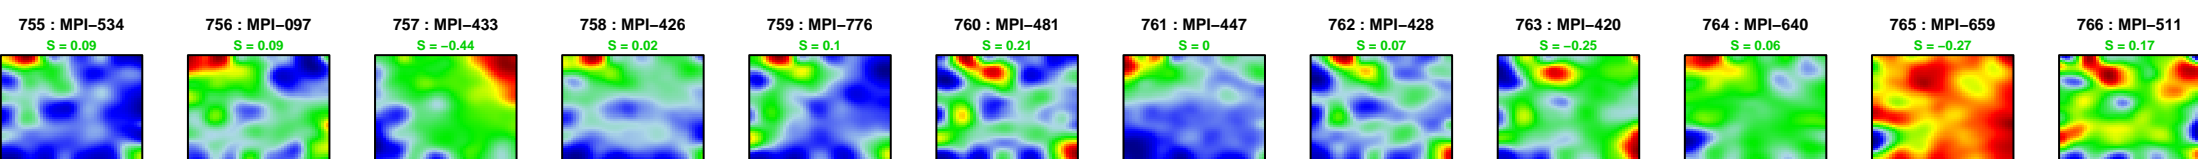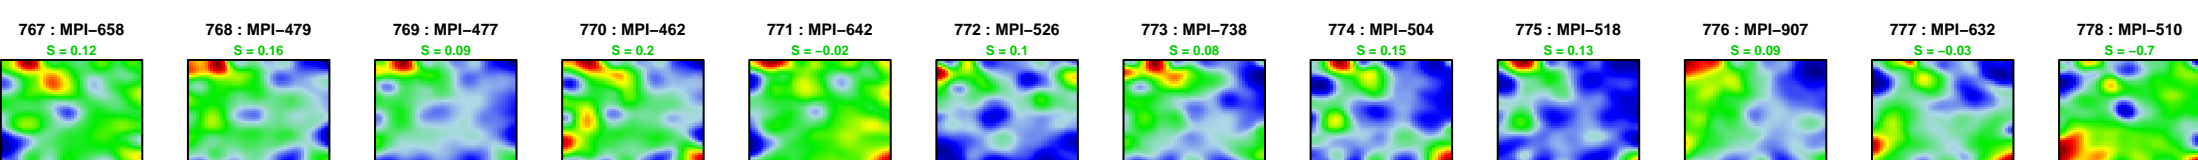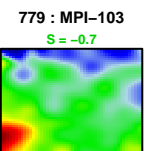

*other*

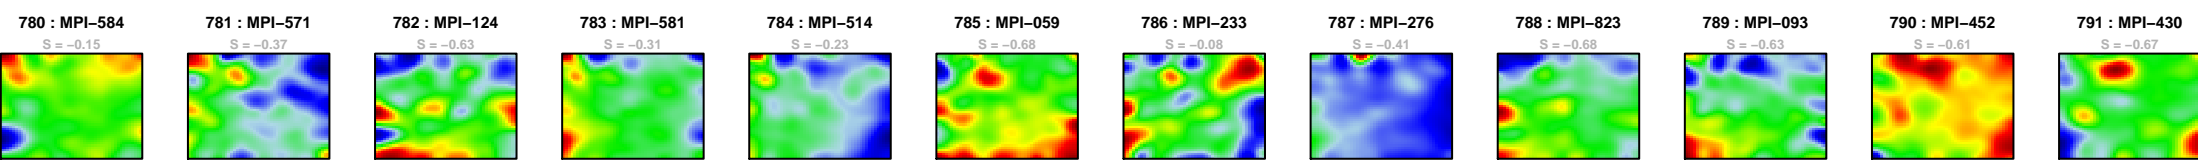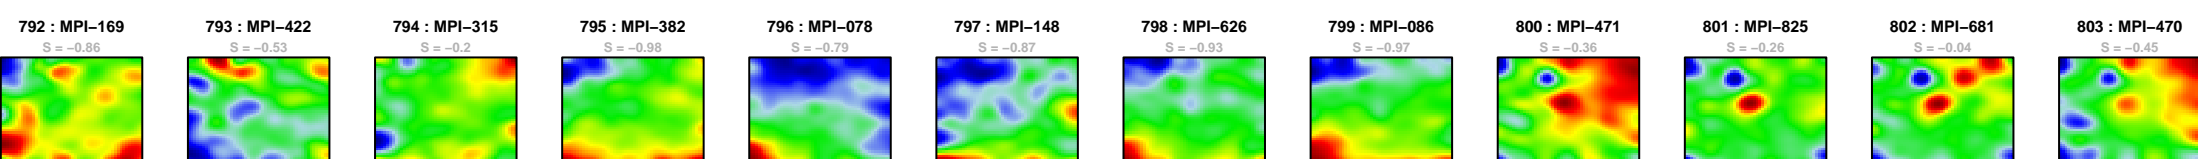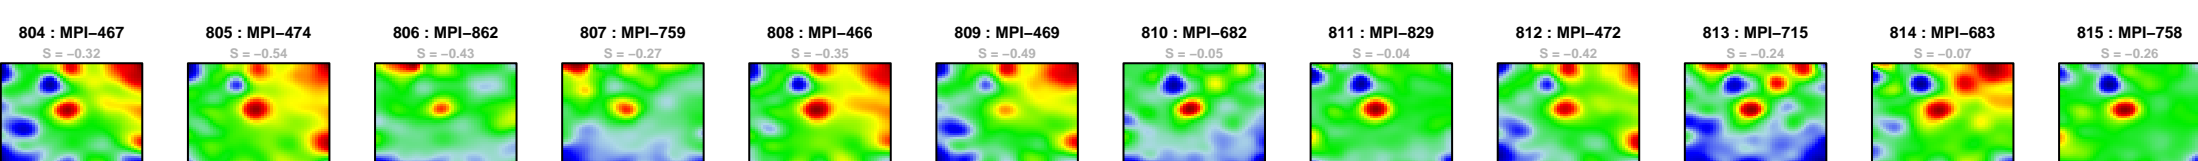

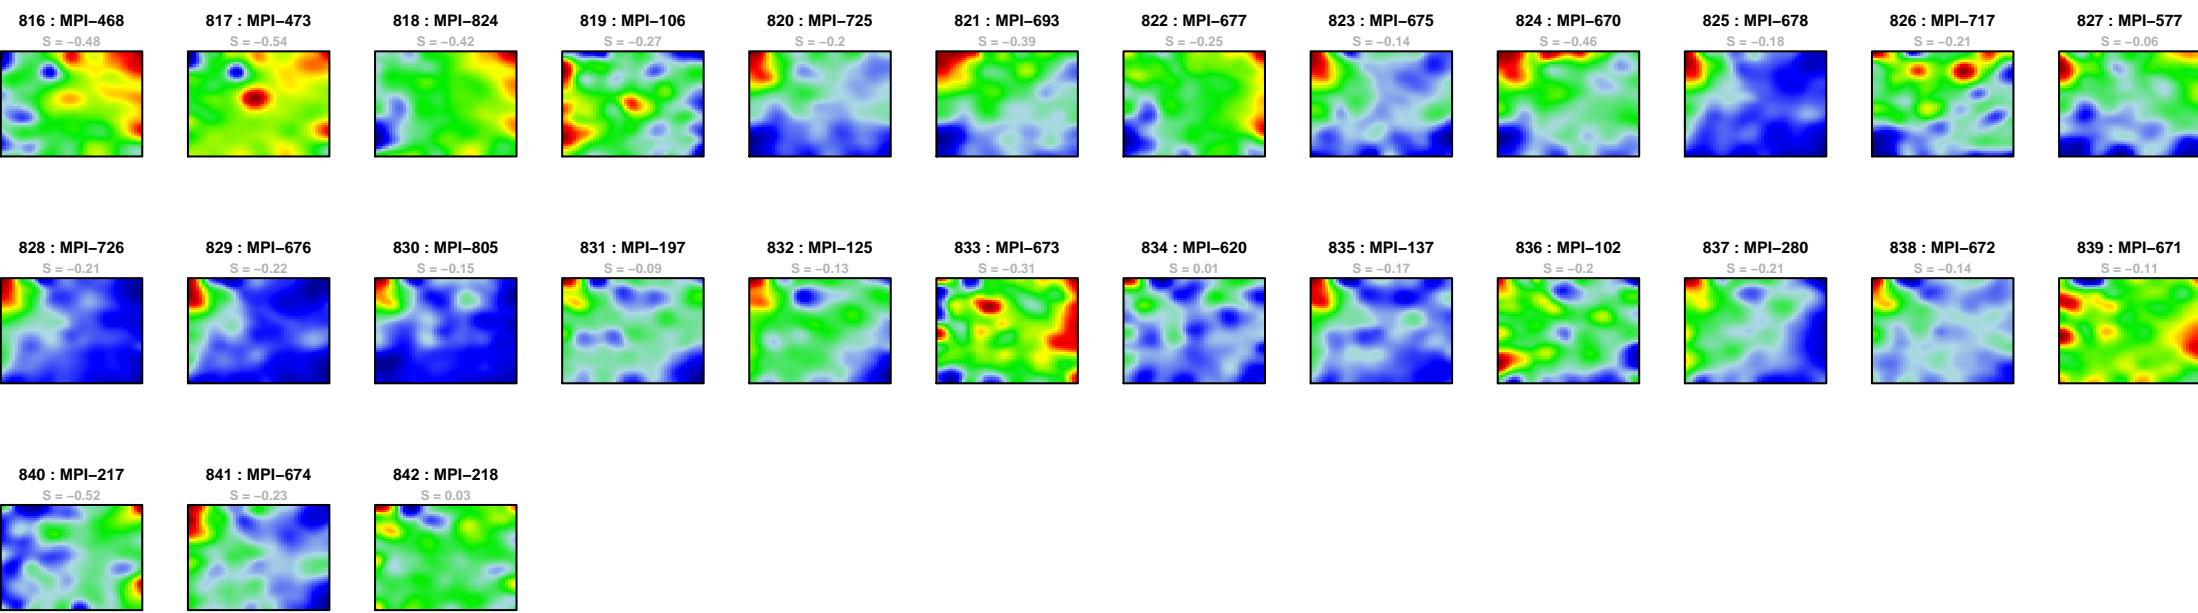

*cell line*

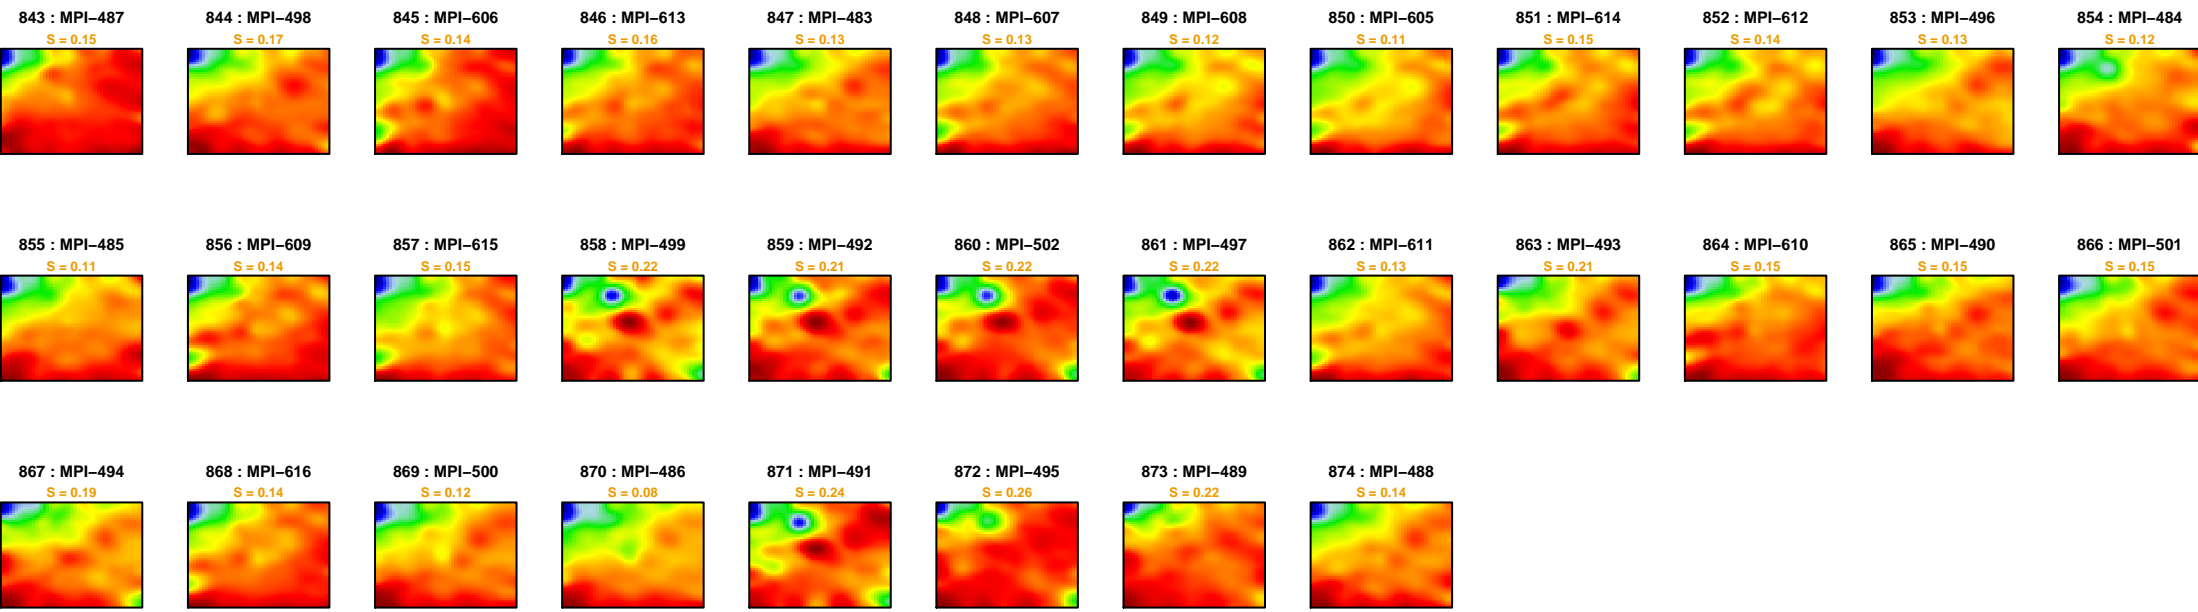

*B-cells*

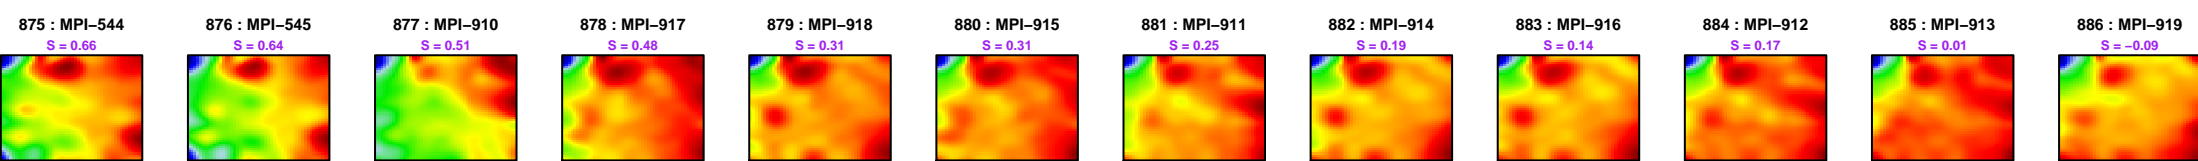

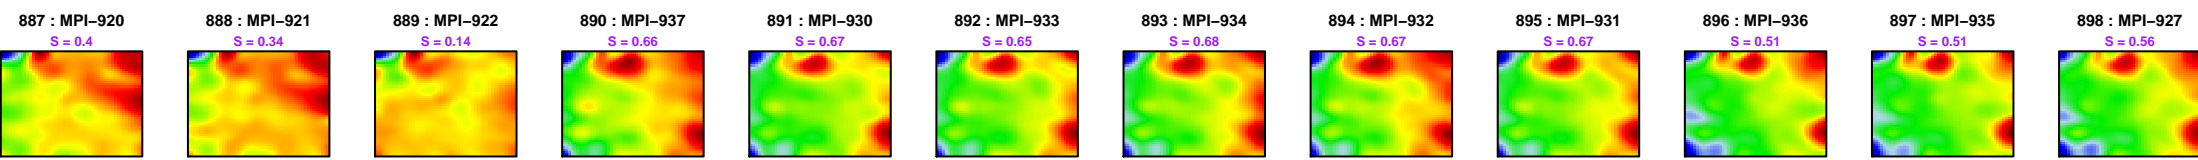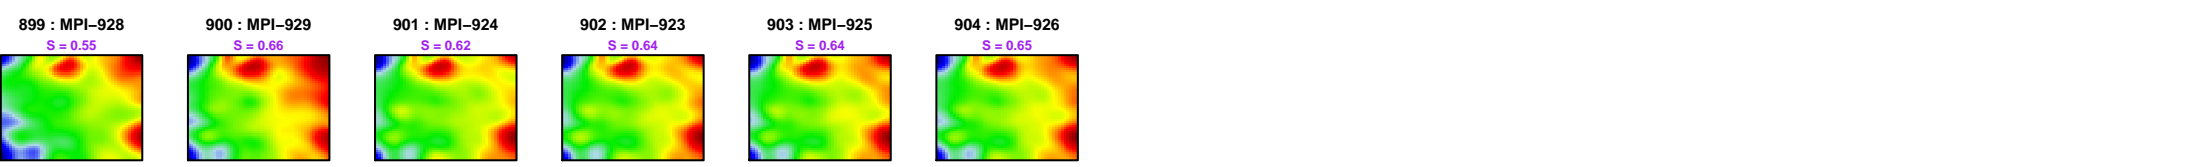

*tonsil*

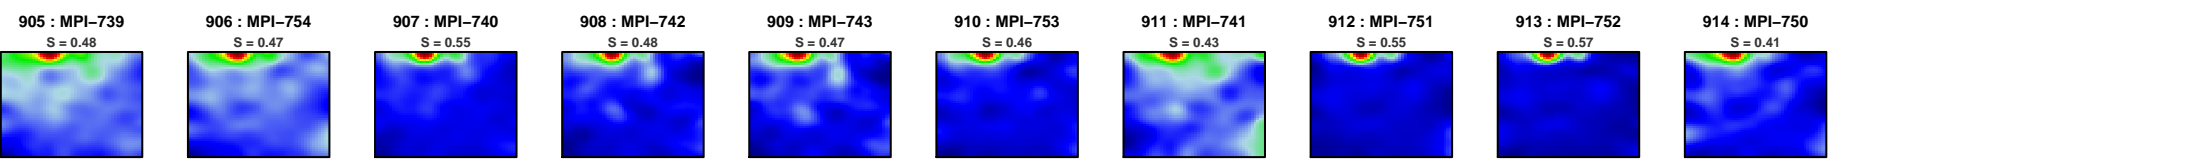

Supplement: MOESM3 [file 13073_2019_637_MOESM3_ESM.pdf]
