# Supplementary material for: A modular transcriptome map of mature B cell lymphomas
Source: Genome Med. 2019 Apr 30;11:27. doi: 10.1186/s13073-019-0637-7 (PMC6492344; doi:10.1186/s13073-019-0637-7)
Supplement: Supplementary file 2 — Table of samples, providing histopathological and molecular subtypes. (XLSX 41 kb) [file 13073_2019_637_MOESM2_ESM.xlsx]

## Sheet: Classified
ID	Histological diagnosis	PAT	Cancer hallmark type	Hummel classification	Rosolowski classification	Bentink classification	Wright classification
MPI-034	BL	A D	Proliferative	mBL		mind-L	unclassified
MPI-089	BL	A B D	Proliferative	mBL		BL-PAP	GCB
MPI-003	BL	A B D	Proliferative	mBL		BL-PAP	GCB
MPI-018	BL	A B D	Proliferative	mBL		BL-PAP	GCB
MPI-066	BL	A B D	Proliferative	mBL		BL-PAP	GCB
MPI-075	BL	A B D	Proliferative	mBL		BL-PAP	GCB
MPI-090	BL	A D	Proliferative	mBL		BL-PAP	GCB
MPI-156	BL	A B D	Proliferative	mBL		BL-PAP	GCB
MPI-171	BL	A B D	Proliferative	mBL		BL-PAP	GCB
MPI-211	BL	A D	Proliferative	mBL		BL-PAP	GCB
MPI-417	BL	L	Weakly carcinogenic	mBL		mind-L	GCB
MPI-697	BL	A	Proliferative	mBL		BL-PAP	GCB
MPI-747	BL	A B D	Proliferative	mBL		BL-PAP	GCB
MPI-140	BL	A B D	Proliferative	mBL		mind-L	GCB
MPI-087	BL	A B D	Proliferative	mBL		BL-PAP	unclassified
MPI-091	BL	D	Proliferative	mBL		BL-PAP	unclassified
MPI-172	BL	A B D	Proliferative	mBL		BL-PAP	GCB
MPI-220	BL	L M	Weakly carcinogenic	mBL		mind-L	GCB
MPI-568	BL	A	Proliferative	mBL		mind-L	GCB
MPI-576	BL	none	NA	mBL		mind-L	GCB
MPI-588	BL	A D	Proliferative	mBL		BL-PAP	GCB
MPI-589	BL	A D	Proliferative	mBL		BL-PAP	GCB
MPI-095	BL	A B D	Proliferative	mBL		BL-PAP	GCB
MPI-529	BL	A D	Proliferative	mBL		BL-PAP	GCB
MPI-144	BL	A B D	Proliferative	mBL		BL-PAP	GCB
MPI-017	BL	A B D	Proliferative	mBL		BL-PAP	GCB
MPI-032	BL	A B D	Proliferative	mBL		BL-PAP	GCB
MPI-033	BL	A B D	Proliferative	mBL		BL-PAP	GCB
MPI-048	BL	A B D	Proliferative	mBL		BL-PAP	GCB
MPI-077	BL	A B D	Proliferative	mBL		BL-PAP	GCB
MPI-079	BL	A B D	Proliferative	mBL		BL-PAP	unclassified
MPI-080	BL	A B D	Proliferative	mBL		BL-PAP	GCB
MPI-084	BL	A D	Proliferative	mBL		BL-PAP	GCB
MPI-085	BL	A B D	Proliferative	mBL		BL-PAP	GCB
MPI-114	BL	A B D	Proliferative	mBL		BL-PAP	GCB
MPI-139	BL	A	Proliferative	mBL		BL-PAP	GCB
MPI-147	BL	A	Proliferative	mBL		BL-PAP	GCB
MPI-527	BL	A D	Proliferative	mBL		BL-PAP	GCB
MPI-528	BL	A D	Proliferative	mBL		BL-PAP	GCB
MPI-579	BL	A D	Proliferative	mBL		BL-PAP	GCB
MPI-580	BL	A B D	Proliferative	mBL		BL-PAP	GCB
MPI-591	BL	A B D	Proliferative	mBL		BL-PAP	GCB
MPI-618	BL	A D	Proliferative	mBL		mind-L	GCB
MPI-622	BL	A D	Proliferative	mBL		BL-PAP	GCB
MPI-625	BL	A B D	Proliferative	mBL		BL-PAP	GCB
MPI-895	BL	A B D	Proliferative	mBL		mind-L	GCB
MPI-055	BL	A B D	Proliferative	mBL		BL-PAP	GCB
MPI-101	BL	A B D	Proliferative	mBL		BL-PAP	GCB
MPI-323	BL	A B D	Proliferative	mBL		BL-PAP	GCB
MPI-001	BL	A B D	Proliferative	mBL		BL-PAP	GCB
MPI-002	BL	none	NA	mBL		BL-PAP	GCB
MPI-004	BL	A B D	Proliferative	mBL		BL-PAP	GCB
MPI-005	BL	A B D	Proliferative	mBL		BL-PAP	GCB
MPI-016	BL	A B D	Proliferative	mBL		BL-PAP	GCB
MPI-027	BL	A B D	Proliferative	mBL		BL-PAP	GCB
MPI-043	BL	A B D	Proliferative	mBL		BL-PAP	GCB
MPI-044	BL	A B D	Proliferative	mBL		BL-PAP	GCB
MPI-049	BL	A B D	Proliferative	mBL		BL-PAP	GCB
MPI-067	BL	A B C D	Balanced proliferative	mBL		mind-L	GCB
MPI-071	BL	A D	Proliferative	mBL		BL-PAP	GCB
MPI-082	BL	A B D	Proliferative	mBL		BL-PAP	GCB
MPI-123	BL	A D	Proliferative	mBL		BL-PAP	GCB
MPI-138	BL	A B D	Proliferative	mBL		BL-PAP	GCB
MPI-532	BL	A D	Proliferative	mBL		mind-L	GCB
MPI-586	BL	A B D	Proliferative	mBL		BL-PAP	GCB
MPI-590	BL	A	Proliferative	mBL		BL-PAP	unclassified
MPI-621	BL	A B D	Proliferative	mBL		BL-PAP	GCB
MPI-623	BL	A B D	Proliferative	mBL		BL-PAP	GCB
MPI-680	BL	A B D	Proliferative	mBL		BL-PAP	GCB
MPI-081	BL	A B D	Proliferative	mBL		BL-PAP	GCB
MPI-803	BL	D	Proliferative	mBL		BL-PAP	GCB
MPI-837	BL	A B D	Proliferative	mBL		BL-PAP	GCB
MPI-838	BL	A B D	Proliferative	mBL		BL-PAP	GCB
MPI-793	BL	A	Proliferative	mBL		BL-PAP	GCB
MPI-245	intermediate	none	NA	intermediate		PAP-2	ABC
MPI-222	intermediate	L M	Weakly carcinogenic	intermediate		mind-L	unclassified
MPI-333	intermediate	none	NA	intermediate		mind-L	ABC
MPI-322	intermediate	none	NA	intermediate		mind-L	GCB
MPI-175	intermediate	E	Balanced proliferative	intermediate	HiGA-PRO	PAP-4	GCB
MPI-161	intermediate	L M	Weakly carcinogenic	intermediate		PAP-2	ABC
MPI-038	intermediate	A B C D	Balanced proliferative	intermediate		mind-L	unclassified
MPI-645	intermediate	G L	Balanced inflammatory	intermediate		mind-L	GCB
MPI-061	intermediate	H	Weakly carcinogenic	intermediate		PAP-3	ABC
MPI-011	intermediate	D	Proliferative	intermediate		mind-L	GCB
MPI-041	intermediate	L	Weakly carcinogenic	intermediate	LoGA	mind-L	GCB
MPI-242	intermediate	none	NA	intermediate		mind-L	GCB
MPI-317	intermediate	F I	Inflammatory	intermediate	HiGA-SIR	PAP-1	unclassified
MPI-530	intermediate	D	Proliferative	intermediate	HiGA-SIR	PAP-3	GCB
MPI-661	intermediate	none	NA	intermediate	HiGA-PRO	PAP-3	GCB
MPI-816	intermediate	G I	Balanced inflammatory	intermediate		PAP-4	GCB
MPI-582	intermediate	G	Balanced inflammatory	intermediate	HiGA-SIR	PAP-1	GCB
MPI-026	intermediate	none	NA	intermediate		mind-L	ABC
MPI-060	intermediate	H	Weakly carcinogenic	intermediate		mind-L	GCB
MPI-549	intermediate	none	NA	intermediate		mind-L	unclassified
MPI-592	intermediate	E G	Balanced proliferative	intermediate	HiGA-SIR	PAP-3	GCB
MPI-057	intermediate	A	Proliferative	intermediate		mind-L	GCB
MPI-691	intermediate	F G	Inflammatory	intermediate	HiGA-SIR	mind-L	GCB
MPI-311	intermediate	A I J	Balanced inflammatory	intermediate	HiGA-SIR	mind-L	GCB
MPI-292	intermediate	G	Balanced inflammatory	intermediate	HiGA-SIR	PAP-1	GCB
MPI-006	intermediate	A B D	Proliferative	mBL		mind-L	GCB
MPI-065	intermediate	A D	Proliferative	mBL		mind-L	GCB
MPI-835	intermediate	F	Inflammatory	intermediate		PAP-3	GCB
MPI-072	intermediate	A D	Proliferative	intermediate		BL-PAP	GCB
MPI-849	intermediate	J	Weakly carcinogenic	intermediate		mind-L	unclassified
MPI-007	intermediate	B C D	Balanced proliferative	intermediate	HiGA-PRO	mind-L	GCB
MPI-050	intermediate	D	Proliferative	intermediate	HiGA-PRO	mind-L	unclassified
MPI-064	intermediate	none	NA	intermediate	HiGA-PRO	PAP-4	GCB
MPI-107	intermediate	none	NA	intermediate	HiGA-PRO	PAP-4	unclassified
MPI-126	intermediate	J	Weakly carcinogenic	intermediate	HiGA-SIR	PAP-3	ABC
MPI-131	intermediate	H	Weakly carcinogenic	intermediate	HiGA-PRO	PAP-3	ABC
MPI-143	intermediate	G	Balanced inflammatory	intermediate	LoGA	mind-L	GCB
MPI-250	intermediate	none	NA	intermediate	HiGA-PRO	PAP-3	ABC
MPI-253	intermediate	none	NA	intermediate		mind-L	ABC
MPI-284	intermediate	F	Inflammatory	intermediate	HiGA-SIR	PAP-1	GCB
MPI-294	intermediate	none	NA	intermediate	HiGA-PRO	mind-L	unclassified
MPI-310	intermediate	J	Weakly carcinogenic	intermediate	HiGA-SIR	mind-L	GCB
MPI-325	intermediate	none	NA	intermediate	HiGA-PRO	mind-L	GCB
MPI-362	intermediate	F	Inflammatory	intermediate	HiGA-SIR	PAP-1	GCB
MPI-421	intermediate	F	Inflammatory	intermediate		PAP-3	GCB
MPI-439	intermediate	E G	Balanced proliferative	intermediate	LoGA	PAP-1	GCB
MPI-654	intermediate	none	NA	intermediate	HiGA-PRO	PAP-1	GCB
MPI-732	intermediate	F G	Inflammatory	intermediate	HiGA-SIR	PAP-3	GCB
MPI-783	intermediate	F	Inflammatory	intermediate		PAP-4	GCB
MPI-808	intermediate	none	NA	intermediate		PAP-4	GCB
MPI-843	intermediate	none	NA	intermediate		PAP-3	unclassified
MPI-859	intermediate	D	Proliferative	intermediate		mind-L	GCB
MPI-024	intermediate	none	NA	intermediate	HiGA-PRO	PAP-4	GCB
MPI-225	intermediate	D	Proliferative	intermediate	HiGA-SIR	PAP-4	GCB
MPI-249	intermediate	E	Balanced proliferative	intermediate	LoGA	mind-L	GCB
MPI-384	intermediate	L	Weakly carcinogenic	intermediate	LoGA	mind-L	GCB
MPI-755	intermediate	A	Proliferative	intermediate		mind-L	GCB
MPI-850	intermediate	A D	Proliferative	intermediate		mind-L	GCB
MPI-852	intermediate	A B D	Proliferative	intermediate		BL-PAP	GCB
MPI-336	intermediate	E	Balanced proliferative	intermediate	HiGA-PRO	PAP-3	unclassified
MPI-368	intermediate	F G	Inflammatory	intermediate	HiGA-SIR	PAP-3	GCB
MPI-037	intermediate	D	Proliferative	intermediate	HiGA-PRO	mind-L	GCB
MPI-094	intermediate	none	NA	intermediate	HiGA-PRO	mind-L	GCB
MPI-099	intermediate	none	NA	intermediate	HiGA-PRO	mind-L	GCB
MPI-372	intermediate	G I J	Balanced inflammatory	intermediate	LoGA	PAP-1	ABC
MPI-275	intermediate	D	Proliferative	intermediate		BL-PAP	unclassified
MPI-569	intermediate	none	NA	intermediate		mind-L	GCB
MPI-216	intermediate	L	Weakly carcinogenic	intermediate	HiGA-SIR	mind-L	GCB
MPI-716	intermediate	G I J	Balanced inflammatory	intermediate	LoGA	PAP-1	GCB
MPI-070	intermediate	E	Balanced proliferative	intermediate	HiGA-PRO	mind-L	ABC
MPI-572	intermediate	G L	Balanced inflammatory	intermediate		mind-L	GCB
MPI-054	intermediate	none	NA	intermediate		mind-L	GCB
MPI-214	intermediate	F	Inflammatory	intermediate		mind-L	GCB
MPI-619	intermediate	G L	Balanced inflammatory	intermediate		mind-L	GCB
MPI-587	intermediate	none	NA	intermediate		mind-L	GCB
MPI-116	intermediate	none	NA	intermediate		mind-L	GCB
MPI-593	intermediate	G	Balanced inflammatory	intermediate		mind-L	GCB
MPI-574	intermediate	none	NA	intermediate		mind-L	GCB
MPI-767	intermediate	L	Weakly carcinogenic	intermediate		mind-L	GCB
MPI-117	intermediate	A D	Proliferative	intermediate		mind-L	GCB
MPI-583	intermediate	A	Proliferative	intermediate		BL-PAP	GCB
MPI-178	DLBCL ABC	F	Inflammatory	non-mBL	HiGA-PRO	PAP-2	ABC
MPI-088	DLBCL ABC	E	Balanced proliferative	non-mBL	HiGA-PRO	PAP-3	ABC
MPI-160	DLBCL ABC	F J	Inflammatory	non-mBL		PAP-1	ABC
MPI-288	DLBCL ABC	F	Inflammatory	non-mBL	HiGA-SIR	PAP-1	ABC
MPI-401	DLBCL ABC	J	Weakly carcinogenic	non-mBL	HiGA-SIR	PAP-2	ABC
MPI-692	DLBCL ABC	E	Balanced proliferative	non-mBL	HiGA-SIR	PAP-3	ABC
MPI-695	DLBCL ABC	none	NA	non-mBL	HiGA-SIR	PAP-4	ABC
MPI-696	DLBCL ABC	E	Balanced proliferative	non-mBL	HiGA-SIR	PAP-3	ABC
MPI-705	DLBCL ABC	E F	Inflammatory	non-mBL	HiGA-SIR	PAP-3	ABC
MPI-182	DLBCL ABC	E	Balanced proliferative	non-mBL	HiGA-PRO	PAP-2	ABC
MPI-289	DLBCL ABC	F G	Inflammatory	non-mBL	HiGA-SIR	PAP-4	ABC
MPI-133	DLBCL ABC	none	NA	non-mBL	HiGA-SIR	mind-L	ABC
MPI-146	DLBCL ABC	E	Balanced proliferative	non-mBL	HiGA-PRO	mind-L	ABC
MPI-015	DLBCL ABC	E	Balanced proliferative	non-mBL	HiGA-PRO	PAP-3	ABC
MPI-045	DLBCL ABC	none	NA	non-mBL	HiGA-PRO	PAP-3	ABC
MPI-100	DLBCL ABC	E	Balanced proliferative	non-mBL	HiGA-PRO	PAP-2	ABC
MPI-597	DLBCL ABC	F G I	Inflammatory	non-mBL	HiGA-SIR	PAP-1	ABC
MPI-190	DLBCL ABC	J	Weakly carcinogenic	non-mBL	LoGA	PAP-2	ABC
MPI-791	DLBCL ABC	F J	Inflammatory	non-mBL		PAP-1	ABC
MPI-794	DLBCL ABC	E F	Inflammatory	non-mBL		PAP-3	ABC
MPI-833	DLBCL ABC	F I J	Inflammatory	non-mBL		PAP-4	ABC
MPI-047	DLBCL ABC	E F	Inflammatory	non-mBL	HiGA-PRO	PAP-3	ABC
MPI-110	DLBCL ABC	E	Balanced proliferative	non-mBL	HiGA-PRO	PAP-4	ABC
MPI-130	DLBCL ABC	E F	Inflammatory	non-mBL	HiGA-SIR	mind-L	ABC
MPI-149	DLBCL ABC	L M	Weakly carcinogenic	non-mBL	LoGA	PAP-2	ABC
MPI-179	DLBCL ABC	E J	Balanced proliferative	non-mBL	HiGA-PRO	PAP-1	ABC
MPI-239	DLBCL ABC	E	Balanced proliferative	non-mBL	HiGA-PRO	PAP-1	ABC
MPI-277	DLBCL ABC	none	NA	non-mBL	HiGA-SIR	PAP-1	ABC
MPI-279	DLBCL ABC	none	NA	non-mBL		PAP-3	ABC
MPI-343	DLBCL ABC	F I J	Inflammatory	non-mBL	HiGA-SIR	PAP-1	ABC
MPI-349	DLBCL ABC	F	Inflammatory	non-mBL	HiGA-SIR	PAP-1	ABC
MPI-419	DLBCL ABC	none	NA	non-mBL	HiGA-PRO	PAP-2	ABC
MPI-745	DLBCL ABC	E	Balanced proliferative	non-mBL		PAP-1	ABC
MPI-764	DLBCL ABC	F	Inflammatory	non-mBL		PAP-1	ABC
MPI-857	DLBCL ABC	none	NA	non-mBL		PAP-1	ABC
MPI-881	DLBCL ABC	F	Inflammatory	non-mBL		PAP-1	ABC
MPI-230	DLBCL ABC	F	Inflammatory	non-mBL		PAP-3	ABC
MPI-366	DLBCL ABC	E	Balanced proliferative	non-mBL	HiGA-PRO	mind-L	ABC
MPI-864	DLBCL ABC	F	Inflammatory	non-mBL		PAP-1	ABC
MPI-031	DLBCL ABC	E	Balanced proliferative	non-mBL	HiGA-PRO	PAP-2	ABC
MPI-836	DLBCL ABC	none	NA	non-mBL		PAP-3	ABC
MPI-135	DLBCL ABC	E	Balanced proliferative	non-mBL	HiGA-PRO	PAP-3	ABC
MPI-820	DLBCL ABC	F J	Inflammatory	non-mBL		PAP-1	ABC
MPI-858	DLBCL ABC	E F	Inflammatory	non-mBL		PAP-1	ABC
MPI-688	DLBCL ABC	F J	Inflammatory	non-mBL	HiGA-SIR	PAP-3	ABC
MPI-892	DLBCL ABC	F G	Inflammatory	non-mBL		PAP-1	ABC
MPI-790	DLBCL ABC	G I	Balanced inflammatory	non-mBL		mind-L	ABC
MPI-834	DLBCL ABC	E J	Balanced proliferative	non-mBL		PAP-3	ABC
MPI-855	DLBCL ABC	E G	Balanced proliferative	non-mBL		mind-L	ABC
MPI-168	DLBCL ABC	none	NA	non-mBL	LoGA	mind-L	ABC
MPI-008	DLBCL ABC	E F	Inflammatory	non-mBL	HiGA-SIR	PAP-4	ABC
MPI-009	DLBCL ABC	F	Inflammatory	non-mBL	HiGA-SIR	PAP-1	ABC
MPI-014	DLBCL ABC	E	Balanced proliferative	non-mBL	HiGA-PRO	PAP-3	ABC
MPI-029	DLBCL ABC	E F	Inflammatory	non-mBL	HiGA-SIR	PAP-4	ABC
MPI-040	DLBCL ABC	H L	Weakly carcinogenic	non-mBL	LoGA	PAP-2	ABC
MPI-042	DLBCL ABC	E	Balanced proliferative	non-mBL		PAP-3	ABC
MPI-062	DLBCL ABC	E	Balanced proliferative	non-mBL	HiGA-PRO	PAP-4	ABC
MPI-083	DLBCL ABC	E	Balanced proliferative	non-mBL	HiGA-PRO	PAP-1	ABC
MPI-098	DLBCL ABC	E F	Inflammatory	non-mBL	HiGA-SIR	PAP-3	ABC
MPI-108	DLBCL ABC	E J	Balanced proliferative	non-mBL	HiGA-PRO	PAP-3	ABC
MPI-118	DLBCL ABC	none	NA	non-mBL	HiGA-PRO	PAP-2	ABC
MPI-132	DLBCL ABC	F	Inflammatory	non-mBL	HiGA-SIR	PAP-3	ABC
MPI-152	DLBCL ABC	E F	Inflammatory	non-mBL	HiGA-SIR	PAP-4	ABC
MPI-159	DLBCL ABC	none	NA	non-mBL	LoGA	PAP-2	ABC
MPI-164	DLBCL ABC	E	Balanced proliferative	non-mBL	LoGA	mind-L	ABC
MPI-170	DLBCL ABC	none	NA	non-mBL		PAP-2	ABC
MPI-174	DLBCL ABC	F	Inflammatory	non-mBL	LoGA	PAP-2	ABC
MPI-180	DLBCL ABC	F	Inflammatory	non-mBL	LoGA	PAP-2	ABC
MPI-181	DLBCL ABC	E	Balanced proliferative	non-mBL		PAP-2	ABC
MPI-183	DLBCL ABC	E	Balanced proliferative	non-mBL	LoGA	PAP-2	ABC
MPI-199	DLBCL ABC	E F	Inflammatory	non-mBL	HiGA-SIR	PAP-1	ABC
MPI-240	DLBCL ABC	E F	Inflammatory	non-mBL		PAP-1	ABC
MPI-269	DLBCL ABC	E F	Inflammatory	non-mBL	HiGA-SIR	mind-L	ABC
MPI-278	DLBCL ABC	F	Inflammatory	non-mBL	HiGA-SIR	PAP-4	ABC
MPI-305	DLBCL ABC	none	NA	non-mBL		mind-L	ABC
MPI-306	DLBCL ABC	E	Balanced proliferative	non-mBL	HiGA-PRO	mind-L	ABC
MPI-319	DLBCL ABC	E	Balanced proliferative	non-mBL	HiGA-PRO	PAP-3	ABC
MPI-328	DLBCL ABC	E F	Inflammatory	non-mBL		PAP-3	ABC
MPI-337	DLBCL ABC	none	NA	non-mBL	HiGA-PRO	PAP-3	ABC
MPI-340	DLBCL ABC	E G	Balanced proliferative	non-mBL	HiGA-PRO	PAP-4	ABC
MPI-346	DLBCL ABC	F I	Inflammatory	non-mBL	HiGA-SIR	mind-L	ABC
MPI-352	DLBCL ABC	E	Balanced proliferative	non-mBL	HiGA-PRO	PAP-3	ABC
MPI-357	DLBCL ABC	none	NA	non-mBL	HiGA-PRO	mind-L	ABC
MPI-359	DLBCL ABC	E F	Inflammatory	non-mBL	HiGA-PRO	PAP-1	ABC
MPI-374	DLBCL ABC	E F	Inflammatory	non-mBL	HiGA-SIR	PAP-1	ABC
MPI-380	DLBCL ABC	F	Inflammatory	non-mBL		PAP-3	ABC
MPI-395	DLBCL ABC	F G	Inflammatory	non-mBL	HiGA-SIR	mind-L	ABC
MPI-415	DLBCL ABC	F G I	Inflammatory	non-mBL	HiGA-SIR	PAP-1	ABC
MPI-416	DLBCL ABC	J	Weakly carcinogenic	non-mBL	HiGA-SIR	PAP-1	ABC
MPI-418	DLBCL ABC	E	Balanced proliferative	non-mBL	HiGA-PRO	PAP-2	ABC
MPI-550	DLBCL ABC	G	Balanced inflammatory	non-mBL	HiGA-SIR	mind-L	ABC
MPI-552	DLBCL ABC	J	Weakly carcinogenic	non-mBL	HiGA-SIR	PAP-1	ABC
MPI-566	DLBCL ABC	F	Inflammatory	non-mBL	HiGA-SIR	PAP-1	ABC
MPI-594	DLBCL ABC	none	NA	non-mBL	HiGA-SIR	PAP-1	ABC
MPI-731	DLBCL ABC	E F	Inflammatory	non-mBL	HiGA-SIR	PAP-1	ABC
MPI-856	DLBCL ABC	E F G	Inflammatory	non-mBL		mind-L	ABC
MPI-865	DLBCL ABC	E F	Inflammatory	non-mBL		mind-L	ABC
MPI-883	DLBCL ABC	F	Inflammatory	non-mBL		PAP-1	ABC
MPI-373	DLBCL ABC	G	Balanced inflammatory	non-mBL	HiGA-SIR	PAP-3	ABC
MPI-734	DLBCL ABC	none	NA	non-mBL	LoGA	PAP-1	ABC
MPI-013	DLBCL ABC	none	NA	non-mBL	HiGA-PRO	mind-L	ABC
MPI-270	DLBCL ABC	F	Inflammatory	non-mBL	HiGA-SIR	PAP-1	ABC
MPI-286	DLBCL ABC	F J	Inflammatory	non-mBL	HiGA-SIR	PAP-1	ABC
MPI-327	DLBCL ABC	E	Balanced proliferative	non-mBL	HiGA-PRO	mind-L	ABC
MPI-795	DLBCL ABC	E F	Inflammatory	non-mBL		PAP-4	ABC
MPI-812	DLBCL ABC	F G I	Inflammatory	non-mBL		PAP-1	ABC
MPI-821	DLBCL ABC	E	Balanced proliferative	non-mBL		PAP-1	ABC
MPI-822	DLBCL ABC	E F	Inflammatory	non-mBL		mind-L	ABC
MPI-841	DLBCL ABC	E	Balanced proliferative	non-mBL		PAP-3	ABC
MPI-842	DLBCL ABC	J	Weakly carcinogenic	non-mBL		PAP-1	ABC
MPI-424	DLBCL ABC	none	NA	non-mBL	HiGA-SIR	mind-L	ABC
MPI-832	DLBCL ABC	F	Inflammatory	non-mBL		PAP-1	ABC
MPI-304	DLBCL ABC	G	Balanced inflammatory	non-mBL	HiGA-SIR	PAP-3	ABC
MPI-167	DLBCL ABC	none	NA	non-mBL	LoGA	PAP-2	ABC
MPI-177	DLBCL ABC	none	NA	non-mBL	LoGA	PAP-2	ABC
MPI-347	DLBCL ABC	none	NA	non-mBL	HiGA-PRO	PAP-1	ABC
MPI-442	DLBCL ABC	none	NA	non-mBL		mind-L	ABC
MPI-699	DLBCL ABC	F	Inflammatory	non-mBL	HiGA-SIR	mind-L	ABC
MPI-718	DLBCL ABC	F G I J	Inflammatory	non-mBL		mind-L	ABC
MPI-782	DLBCL ABC	F I J	Inflammatory	non-mBL		PAP-1	ABC
MPI-806	DLBCL ABC	none	NA	non-mBL		PAP-3	ABC
MPI-377	DLBCL ABC	none	NA	non-mBL	HiGA-PRO	PAP-1	ABC
MPI-115	DLBCL ABC	H	Weakly carcinogenic	non-mBL	HiGA-PRO	PAP-2	ABC
MPI-185	DLBCL ABC	E	Balanced proliferative	non-mBL	HiGA-PRO	PAP-2	ABC
MPI-192	DLBCL ABC	none	NA	non-mBL	HiGA-PRO	PAP-1	ABC
MPI-194	DLBCL ABC	F	Inflammatory	non-mBL	HiGA-SIR	PAP-2	ABC
MPI-244	DLBCL ABC	F	Inflammatory	non-mBL	HiGA-SIR	PAP-1	ABC
MPI-737	DLBCL ABC	F	Inflammatory	non-mBL	HiGA-SIR	PAP-3	ABC
MPI-761	DLBCL ABC	J	Weakly carcinogenic	non-mBL		PAP-1	ABC
MPI-274	DLBCL ABC	F	Inflammatory	non-mBL	HiGA-SIR	PAP-3	ABC
MPI-769	DLBCL ABC	F	Inflammatory	non-mBL		mind-L	ABC
MPI-763	DLBCL ABC	none	NA	non-mBL		mind-L	ABC
MPI-827	DLBCL ABC	F	Inflammatory	non-mBL		PAP-1	ABC
MPI-893	DLBCL GCB	F G J	Inflammatory	non-mBL		PAP-1	GCB
MPI-628	DLBCL GCB	J	Weakly carcinogenic	non-mBL	HiGA-SIR	PAP-1	GCB
MPI-173	DLBCL GCB	E F G	Inflammatory	non-mBL	HiGA-SIR	PAP-1	GCB
MPI-207	DLBCL GCB	G	Balanced inflammatory	non-mBL	LoGA	PAP-1	GCB
MPI-227	DLBCL GCB	none	NA	non-mBL	LoGA	PAP-1	GCB
MPI-287	DLBCL GCB	F G	Inflammatory	non-mBL	HiGA-SIR	PAP-1	GCB
MPI-861	DLBCL GCB	F	Inflammatory	non-mBL		PAP-1	GCB
MPI-209	DLBCL GCB	A	Proliferative	non-mBL	LoGA	mind-L	GCB
MPI-202	DLBCL GCB	none	NA	non-mBL	LoGA	PAP-1	GCB
MPI-241	DLBCL GCB	E G	Balanced proliferative	non-mBL	HiGA-SIR	mind-L	GCB
MPI-537	DLBCL GCB	F	Inflammatory	non-mBL	HiGA-SIR	PAP-1	GCB
MPI-025	DLBCL GCB	none	NA	non-mBL	LoGA	PAP-4	GCB
MPI-679	DLBCL GCB	E G	Balanced proliferative	non-mBL	HiGA-SIR	PAP-4	GCB
MPI-290	DLBCL GCB	none	NA	non-mBL	HiGA-PRO	PAP-4	GCB
MPI-638	DLBCL GCB	F	Inflammatory	non-mBL	HiGA-SIR	PAP-4	GCB
MPI-792	DLBCL GCB	L	Weakly carcinogenic	non-mBL		PAP-1	GCB
MPI-851	DLBCL GCB	F G	Inflammatory	non-mBL		PAP-3	GCB
MPI-261	DLBCL GCB	F G	Inflammatory	non-mBL	HiGA-SIR	PAP-1	GCB
MPI-212	DLBCL GCB	F G	Inflammatory	non-mBL	HiGA-SIR	PAP-1	GCB
MPI-441	DLBCL GCB	F G	Inflammatory	non-mBL	HiGA-SIR	PAP-4	GCB
MPI-746	DLBCL GCB	F	Inflammatory	non-mBL		PAP-1	GCB
MPI-223	DLBCL GCB	F G J	Inflammatory	non-mBL	LoGA	PAP-1	GCB
MPI-780	DLBCL GCB	G L	Balanced inflammatory	non-mBL		mind-L	GCB
MPI-781	DLBCL GCB	F G	Inflammatory	non-mBL		PAP-1	GCB
MPI-901	DLBCL GCB	F G J	Inflammatory	non-mBL		PAP-1	GCB
MPI-166	DLBCL GCB	none	NA	non-mBL	LoGA	mind-L	GCB
MPI-404	DLBCL GCB	none	NA	non-mBL	HiGA-SIR	PAP-1	GCB
MPI-475	DLBCL GCB	A I J	Balanced inflammatory	non-mBL		PAP-1	GCB
MPI-324	DLBCL GCB	F	Inflammatory	non-mBL	HiGA-SIR	PAP-1	GCB
MPI-339	DLBCL GCB	F	Inflammatory	non-mBL	HiGA-SIR	mind-L	GCB
MPI-354	DLBCL GCB	none	NA	non-mBL		mind-L	GCB
MPI-367	DLBCL GCB	E F G	Inflammatory	non-mBL	HiGA-SIR	mind-L	GCB
MPI-129	DLBCL GCB	F G I J	Inflammatory	non-mBL	HiGA-SIR	PAP-1	GCB
MPI-694	DLBCL GCB	F G I J	Inflammatory	non-mBL	LoGA	PAP-1	GCB
MPI-766	DLBCL GCB	F G	Inflammatory	non-mBL		PAP-1	GCB
MPI-335	DLBCL GCB	F G I J	Inflammatory	non-mBL	HiGA-SIR	PAP-1	GCB
MPI-669	DLBCL GCB	L	Weakly carcinogenic	non-mBL		mind-L	GCB
MPI-396	DLBCL GCB	F	Inflammatory	non-mBL		PAP-1	GCB
MPI-596	DLBCL GCB	F	Inflammatory	non-mBL		PAP-1	GCB
MPI-122	DLBCL GCB	E F	Inflammatory	non-mBL		PAP-1	GCB
MPI-030	DLBCL GCB	E F	Inflammatory	non-mBL	LoGA	PAP-1	GCB
MPI-092	DLBCL GCB	F	Inflammatory	non-mBL	HiGA-SIR	mind-L	GCB
MPI-109	DLBCL GCB	E F	Inflammatory	non-mBL	HiGA-PRO	PAP-4	GCB
MPI-127	DLBCL GCB	F	Inflammatory	non-mBL	HiGA-SIR	PAP-3	GCB
MPI-128	DLBCL GCB	F	Inflammatory	non-mBL	HiGA-SIR	PAP-3	GCB
MPI-134	DLBCL GCB	E	Balanced proliferative	non-mBL	LoGA	PAP-1	GCB
MPI-136	DLBCL GCB	F G	Inflammatory	non-mBL	HiGA-SIR	PAP-1	GCB
MPI-142	DLBCL GCB	F	Inflammatory	non-mBL	HiGA-SIR	mind-L	GCB
MPI-163	DLBCL GCB	none	NA	non-mBL	LoGA	PAP-2	GCB
MPI-198	DLBCL GCB	none	NA	non-mBL	HiGA-SIR	PAP-1	GCB
MPI-221	DLBCL GCB	G	Balanced inflammatory	non-mBL	HiGA-SIR	PAP-1	GCB
MPI-272	DLBCL GCB	E F	Inflammatory	non-mBL	HiGA-SIR	PAP-4	GCB
MPI-295	DLBCL GCB	F	Inflammatory	non-mBL	HiGA-SIR	PAP-4	GCB
MPI-316	DLBCL GCB	G	Balanced inflammatory	non-mBL	HiGA-SIR	PAP-4	GCB
MPI-318	DLBCL GCB	G I	Balanced inflammatory	non-mBL	HiGA-SIR	PAP-1	GCB
MPI-330	DLBCL GCB	F G	Inflammatory	non-mBL	HiGA-SIR	mind-L	GCB
MPI-332	DLBCL GCB	F G	Inflammatory	non-mBL	HiGA-SIR	PAP-4	GCB
MPI-338	DLBCL GCB	G	Balanced inflammatory	non-mBL	HiGA-SIR	PAP-4	GCB
MPI-344	DLBCL GCB	F	Inflammatory	non-mBL	HiGA-SIR	PAP-1	GCB
MPI-350	DLBCL GCB	F	Inflammatory	non-mBL	HiGA-SIR	PAP-1	GCB
MPI-358	DLBCL GCB	E F	Inflammatory	non-mBL	HiGA-SIR	PAP-4	GCB
MPI-360	DLBCL GCB	F J	Inflammatory	non-mBL	HiGA-SIR	PAP-4	GCB
MPI-364	DLBCL GCB	F G	Inflammatory	non-mBL	HiGA-SIR	PAP-1	GCB
MPI-371	DLBCL GCB	F G	Inflammatory	non-mBL	HiGA-SIR	PAP-1	GCB
MPI-379	DLBCL GCB	E F G	Inflammatory	non-mBL	HiGA-SIR	PAP-1	GCB
MPI-381	DLBCL GCB	G	Balanced inflammatory	non-mBL	HiGA-SIR	PAP-1	GCB
MPI-383	DLBCL GCB	F G	Inflammatory	non-mBL	HiGA-SIR	PAP-1	GCB
MPI-386	DLBCL GCB	J	Weakly carcinogenic	non-mBL	HiGA-PRO	PAP-3	GCB
MPI-399	DLBCL GCB	F	Inflammatory	non-mBL	HiGA-SIR	PAP-1	GCB
MPI-406	DLBCL GCB	none	NA	non-mBL	HiGA-SIR	PAP-1	GCB
MPI-408	DLBCL GCB	I	Inflammatory	non-mBL		PAP-4	GCB
MPI-410	DLBCL GCB	F	Inflammatory	non-mBL	HiGA-SIR	PAP-1	GCB
MPI-411	DLBCL GCB	F G J	Inflammatory	non-mBL	HiGA-SIR	PAP-1	GCB
MPI-413	DLBCL GCB	G	Balanced inflammatory	non-mBL	HiGA-SIR	PAP-1	GCB
MPI-435	DLBCL GCB	F G	Inflammatory	non-mBL	HiGA-SIR	PAP-1	GCB
MPI-436	DLBCL GCB	E G	Balanced proliferative	non-mBL		PAP-1	GCB
MPI-539	DLBCL GCB	F	Inflammatory	non-mBL	LoGA	PAP-1	GCB
MPI-546	DLBCL GCB	E F	Inflammatory	non-mBL	HiGA-SIR	PAP-1	GCB
MPI-548	DLBCL GCB	F	Inflammatory	non-mBL	HiGA-SIR	PAP-1	GCB
MPI-551	DLBCL GCB	F G	Inflammatory	non-mBL		PAP-1	GCB
MPI-556	DLBCL GCB	G	Balanced inflammatory	non-mBL	HiGA-SIR	PAP-1	GCB
MPI-558	DLBCL GCB	F G	Inflammatory	non-mBL	HiGA-SIR	PAP-1	GCB
MPI-573	DLBCL GCB	F G I	Inflammatory	non-mBL		PAP-1	GCB
MPI-624	DLBCL GCB	F G	Inflammatory	non-mBL	HiGA-SIR	PAP-1	GCB
MPI-730	DLBCL GCB	J	Weakly carcinogenic	non-mBL	HiGA-SIR	PAP-1	GCB
MPI-735	DLBCL GCB	L	Weakly carcinogenic	non-mBL	LoGA	mind-L	GCB
MPI-756	DLBCL GCB	F G	Inflammatory	non-mBL		PAP-4	GCB
MPI-796	DLBCL GCB	F G J	Inflammatory	non-mBL		PAP-1	GCB
MPI-798	DLBCL GCB	F	Inflammatory	non-mBL		PAP-4	GCB
MPI-801	DLBCL GCB	none	NA	non-mBL		mind-L	GCB
MPI-802	DLBCL GCB	F	Inflammatory	non-mBL		PAP-4	GCB
MPI-830	DLBCL GCB	F I J	Inflammatory	non-mBL		PAP-4	GCB
MPI-847	DLBCL GCB	F G I	Inflammatory	non-mBL		PAP-1	GCB
MPI-869	DLBCL GCB	I	Inflammatory	non-mBL		PAP-1	GCB
MPI-876	DLBCL GCB	F I	Inflammatory	non-mBL		PAP-1	GCB
MPI-900	DLBCL GCB	G	Balanced inflammatory	non-mBL		PAP-1	GCB
MPI-904	DLBCL GCB	J	Weakly carcinogenic	non-mBL		PAP-1	GCB
MPI-053	DLBCL GCB	E G	Balanced proliferative	non-mBL	HiGA-PRO	PAP-3	GCB
MPI-119	DLBCL GCB	F G	Inflammatory	non-mBL	HiGA-SIR	PAP-1	GCB
MPI-150	DLBCL GCB	F	Inflammatory	non-mBL	HiGA-SIR	PAP-1	GCB
MPI-203	DLBCL GCB	L	Weakly carcinogenic	non-mBL	LoGA	PAP-1	GCB
MPI-231	DLBCL GCB	E G	Balanced proliferative	non-mBL		mind-L	GCB
MPI-285	DLBCL GCB	E	Balanced proliferative	non-mBL	HiGA-SIR	PAP-4	GCB
MPI-329	DLBCL GCB	E	Balanced proliferative	non-mBL	HiGA-PRO	mind-L	GCB
MPI-341	DLBCL GCB	F	Inflammatory	non-mBL	HiGA-SIR	PAP-1	GCB
MPI-393	DLBCL GCB	none	NA	non-mBL	LoGA	PAP-1	GCB
MPI-437	DLBCL GCB	G	Balanced inflammatory	non-mBL		PAP-1	GCB
MPI-686	DLBCL GCB	F G	Inflammatory	non-mBL	HiGA-SIR	PAP-1	GCB
MPI-749	DLBCL GCB	none	NA	non-mBL		mind-L	GCB
MPI-799	DLBCL GCB	F	Inflammatory	non-mBL		mind-L	GCB
MPI-815	DLBCL GCB	none	NA	non-mBL		PAP-4	GCB
MPI-873	DLBCL GCB	F G J	Inflammatory	non-mBL		PAP-1	GCB
MPI-010	DLBCL GCB	D	Proliferative	non-mBL	HiGA-PRO	PAP-3	GCB
MPI-022	DLBCL GCB	none	NA	non-mBL	HiGA-SIR	PAP-4	GCB
MPI-039	DLBCL GCB	E	Balanced proliferative	non-mBL	HiGA-PRO	PAP-2	GCB
MPI-105	DLBCL GCB	F	Inflammatory	non-mBL	HiGA-SIR	PAP-1	GCB
MPI-113	DLBCL GCB	E	Balanced proliferative	non-mBL	HiGA-PRO	PAP-2	GCB
MPI-153	DLBCL GCB	none	NA	non-mBL	LoGA	PAP-1	GCB
MPI-154	DLBCL GCB	I L	Weakly carcinogenic	non-mBL	LoGA	PAP-2	GCB
MPI-255	DLBCL GCB	G	Balanced inflammatory	non-mBL	HiGA-SIR	PAP-3	GCB
MPI-309	DLBCL GCB	E	Balanced proliferative	non-mBL	HiGA-PRO	PAP-4	GCB
MPI-312	DLBCL GCB	F	Inflammatory	non-mBL	HiGA-SIR	PAP-1	GCB
MPI-314	DLBCL GCB	none	NA	non-mBL	HiGA-SIR	PAP-4	GCB
MPI-351	DLBCL GCB	none	NA	non-mBL	HiGA-PRO	mind-L	GCB
MPI-355	DLBCL GCB	E F G	Inflammatory	non-mBL	HiGA-SIR	PAP-1	GCB
MPI-394	DLBCL GCB	F	Inflammatory	non-mBL	HiGA-SIR	PAP-1	GCB
MPI-398	DLBCL GCB	F J	Inflammatory	non-mBL	HiGA-SIR	PAP-1	GCB
MPI-402	DLBCL GCB	J	Weakly carcinogenic	non-mBL	HiGA-SIR	PAP-1	GCB
MPI-427	DLBCL GCB	G	Balanced inflammatory	non-mBL	LoGA	PAP-1	GCB
MPI-547	DLBCL GCB	G I	Balanced inflammatory	non-mBL	LoGA	PAP-1	GCB
MPI-554	DLBCL GCB	G I J	Balanced inflammatory	non-mBL	HiGA-SIR	PAP-1	GCB
MPI-585	DLBCL GCB	F	Inflammatory	non-mBL		PAP-1	GCB
MPI-800	DLBCL GCB	E	Balanced proliferative	non-mBL		PAP-3	GCB
MPI-813	DLBCL GCB	E F	Inflammatory	non-mBL		mind-L	GCB
MPI-844	DLBCL GCB	G	Balanced inflammatory	non-mBL		PAP-1	GCB
MPI-874	DLBCL GCB	none	NA	non-mBL		PAP-1	GCB
MPI-385	DLBCL GCB	B C D	Balanced proliferative	non-mBL	LoGA	mind-L	GCB
MPI-875	DLBCL GCB	F	Inflammatory	non-mBL		PAP-1	GCB
MPI-702	DLBCL GCB	F G	Inflammatory	non-mBL	HiGA-SIR	PAP-1	GCB
MPI-704	DLBCL GCB	F	Inflammatory	non-mBL	HiGA-SIR	PAP-1	GCB
MPI-757	DLBCL GCB	F	Inflammatory	non-mBL		PAP-1	GCB
MPI-689	DLBCL GCB	none	NA	non-mBL	HiGA-PRO	PAP-4	GCB
MPI-012	DLBCL unclassified	E	Balanced proliferative	non-mBL	HiGA-PRO	PAP-3	unclassified
MPI-299	DLBCL unclassified	E F	Inflammatory	non-mBL	HiGA-PRO	PAP-1	unclassified
MPI-219	DLBCL unclassified	L	Weakly carcinogenic	non-mBL	LoGA	PAP-1	unclassified
MPI-282	DLBCL unclassified	F J	Inflammatory	non-mBL	HiGA-PRO	PAP-3	unclassified
MPI-531	DLBCL unclassified	none	NA	non-mBL	HiGA-PRO	mind-L	unclassified
MPI-543	DLBCL unclassified	F I J	Inflammatory	non-mBL	HiGA-SIR	PAP-1	unclassified
MPI-818	DLBCL unclassified	I J	Inflammatory	non-mBL		PAP-1	unclassified
MPI-879	DLBCL unclassified	F G I	Inflammatory	non-mBL		PAP-1	unclassified
MPI-905	DLBCL unclassified	F I J	Inflammatory	non-mBL		PAP-1	unclassified
MPI-390	DLBCL unclassified	E F	Inflammatory	non-mBL	HiGA-SIR	PAP-2	unclassified
MPI-845	DLBCL unclassified	E	Balanced proliferative	non-mBL		PAP-2	unclassified
MPI-291	DLBCL unclassified	E J	Balanced proliferative	non-mBL	HiGA-PRO	mind-L	unclassified
MPI-186	DLBCL unclassified	E J	Balanced proliferative	non-mBL	HiGA-PRO	PAP-2	unclassified
MPI-157	DLBCL unclassified	J	Weakly carcinogenic	non-mBL		PAP-2	unclassified
MPI-234	DLBCL unclassified	F	Inflammatory	non-mBL		PAP-1	unclassified
MPI-063	DLBCL unclassified	E	Balanced proliferative	non-mBL	HiGA-PRO	PAP-3	unclassified
MPI-073	DLBCL unclassified	E	Balanced proliferative	non-mBL	HiGA-PRO	PAP-2	unclassified
MPI-141	DLBCL unclassified	none	NA	non-mBL	HiGA-SIR	PAP-1	unclassified
MPI-196	DLBCL unclassified	none	NA	non-mBL	HiGA-PRO	PAP-1	unclassified
MPI-213	DLBCL unclassified	G I J	Balanced inflammatory	non-mBL	HiGA-SIR	PAP-1	unclassified
MPI-224	DLBCL unclassified	E F	Inflammatory	non-mBL	HiGA-PRO	PAP-1	unclassified
MPI-559	DLBCL unclassified	F	Inflammatory	non-mBL	HiGA-SIR	PAP-1	unclassified
MPI-733	DLBCL unclassified	E F G	Inflammatory	non-mBL	HiGA-SIR	PAP-1	unclassified
MPI-765	DLBCL unclassified	I J	Inflammatory	non-mBL		PAP-1	unclassified
MPI-797	DLBCL unclassified	F	Inflammatory	non-mBL		PAP-1	unclassified
MPI-839	DLBCL unclassified	none	NA	non-mBL		PAP-1	unclassified
MPI-902	DLBCL unclassified	F G	Inflammatory	non-mBL		PAP-1	unclassified
MPI-388	DLBCL unclassified	none	NA	non-mBL	HiGA-SIR	PAP-1	unclassified
MPI-200	DLBCL unclassified	F G	Inflammatory	non-mBL	HiGA-SIR	PAP-1	unclassified
MPI-365	DLBCL unclassified	F	Inflammatory	non-mBL	HiGA-SIR	PAP-1	unclassified
MPI-378	DLBCL unclassified	E F	Inflammatory	non-mBL	HiGA-SIR	mind-L	unclassified
MPI-434	DLBCL unclassified	E F	Inflammatory	non-mBL	HiGA-SIR	PAP-1	unclassified
MPI-809	DLBCL unclassified	F I	Inflammatory	non-mBL		PAP-1	unclassified
MPI-810	DLBCL unclassified	F J	Inflammatory	non-mBL		PAP-4	unclassified
MPI-208	DLBCL unclassified	E J	Balanced proliferative	non-mBL	LoGA	PAP-1	unclassified
MPI-326	DLBCL unclassified	G I J	Balanced inflammatory	non-mBL	HiGA-SIR	mind-L	unclassified
MPI-789	DLBCL unclassified	F	Inflammatory	non-mBL		PAP-3	unclassified
MPI-236	DLBCL unclassified	F	Inflammatory	non-mBL	HiGA-PRO	PAP-1	unclassified
MPI-021	DLBCL unclassified	E F G	Inflammatory	non-mBL	HiGA-SIR	PAP-3	unclassified
MPI-052	DLBCL unclassified	E F	Inflammatory	non-mBL		PAP-3	unclassified
MPI-069	DLBCL unclassified	E	Balanced proliferative	non-mBL	HiGA-PRO	PAP-1	unclassified
MPI-076	DLBCL unclassified	D	Proliferative	non-mBL	HiGA-PRO	mind-L	unclassified
MPI-145	DLBCL unclassified	E F G	Inflammatory	non-mBL	HiGA-SIR	mind-L	unclassified
MPI-155	DLBCL unclassified	E	Balanced proliferative	non-mBL		PAP-1	unclassified
MPI-201	DLBCL unclassified	none	NA	non-mBL	HiGA-PRO	PAP-2	unclassified
MPI-204	DLBCL unclassified	none	NA	non-mBL	LoGA	PAP-2	unclassified
MPI-206	DLBCL unclassified	none	NA	non-mBL	LoGA	PAP-2	unclassified
MPI-232	DLBCL unclassified	F	Inflammatory	non-mBL	HiGA-SIR	PAP-1	unclassified
MPI-243	DLBCL unclassified	F I	Inflammatory	non-mBL	HiGA-SIR	PAP-1	unclassified
MPI-246	DLBCL unclassified	none	NA	non-mBL	HiGA-SIR	PAP-3	unclassified
MPI-273	DLBCL unclassified	G	Balanced inflammatory	non-mBL	HiGA-PRO	mind-L	unclassified
MPI-293	DLBCL unclassified	F G	Inflammatory	non-mBL	HiGA-SIR	mind-L	unclassified
MPI-321	DLBCL unclassified	E	Balanced proliferative	non-mBL	HiGA-PRO	mind-L	unclassified
MPI-348	DLBCL unclassified	none	NA	non-mBL	HiGA-PRO	PAP-1	unclassified
MPI-361	DLBCL unclassified	F	Inflammatory	non-mBL		PAP-1	unclassified
MPI-363	DLBCL unclassified	F G I J	Inflammatory	non-mBL	HiGA-SIR	PAP-1	unclassified
MPI-376	DLBCL unclassified	F	Inflammatory	non-mBL		mind-L	unclassified
MPI-438	DLBCL unclassified	F	Inflammatory	non-mBL	HiGA-SIR	PAP-1	unclassified
MPI-440	DLBCL unclassified	none	NA	non-mBL	HiGA-SIR	PAP-4	unclassified
MPI-541	DLBCL unclassified	none	NA	non-mBL	HiGA-SIR	PAP-1	unclassified
MPI-557	DLBCL unclassified	E G	Balanced proliferative	non-mBL	HiGA-SIR	PAP-3	unclassified
MPI-578	DLBCL unclassified	F G I J	Inflammatory	non-mBL	HiGA-SIR	PAP-1	unclassified
MPI-599	DLBCL unclassified	L	Weakly carcinogenic	non-mBL	LoGA	mind-L	unclassified
MPI-848	DLBCL unclassified	F G J	Inflammatory	non-mBL		PAP-1	unclassified
MPI-899	DLBCL unclassified	F	Inflammatory	non-mBL		PAP-1	unclassified
MPI-023	DLBCL unclassified	E	Balanced proliferative	non-mBL		PAP-4	unclassified
MPI-035	DLBCL unclassified	none	NA	non-mBL		PAP-1	unclassified
MPI-111	DLBCL unclassified	E	Balanced proliferative	non-mBL	HiGA-PRO	PAP-3	unclassified
MPI-151	DLBCL unclassified	none	NA	non-mBL	HiGA-PRO	PAP-3	unclassified
MPI-188	DLBCL unclassified	E	Balanced proliferative	non-mBL	HiGA-PRO	PAP-2	unclassified
MPI-247	DLBCL unclassified	E G	Balanced proliferative	non-mBL	HiGA-PRO	PAP-1	unclassified
MPI-345	DLBCL unclassified	L	Weakly carcinogenic	non-mBL	LoGA	PAP-2	unclassified
MPI-370	DLBCL unclassified	F	Inflammatory	non-mBL	HiGA-SIR	PAP-1	unclassified
MPI-391	DLBCL unclassified	F G J	Inflammatory	non-mBL	HiGA-SIR	PAP-1	unclassified
MPI-397	DLBCL unclassified	E F G	Inflammatory	non-mBL	HiGA-SIR	PAP-1	unclassified
MPI-403	DLBCL unclassified	E F G	Inflammatory	non-mBL	HiGA-SIR	PAP-1	unclassified
MPI-542	DLBCL unclassified	F	Inflammatory	non-mBL		mind-L	unclassified
MPI-553	DLBCL unclassified	E G	Balanced proliferative	non-mBL	HiGA-SIR	PAP-1	unclassified
MPI-685	DLBCL unclassified	F G I J	Inflammatory	non-mBL		PAP-1	unclassified
MPI-807	DLBCL unclassified	L	Weakly carcinogenic	non-mBL		mind-L	unclassified
MPI-831	DLBCL unclassified	E	Balanced proliferative	non-mBL		mind-L	unclassified
MPI-840	DLBCL unclassified	F	Inflammatory	non-mBL		PAP-1	unclassified
MPI-846	DLBCL unclassified	F	Inflammatory	non-mBL		mind-L	unclassified
MPI-860	DLBCL unclassified	E	Balanced proliferative	non-mBL		PAP-4	unclassified
MPI-863	DLBCL unclassified	E F	Inflammatory	non-mBL		PAP-1	unclassified
MPI-369	DLBCL unclassified	E	Balanced proliferative	non-mBL	HiGA-SIR	PAP-1	unclassified
MPI-538	DLBCL unclassified	L	Weakly carcinogenic	non-mBL		mind-L	unclassified
MPI-205	DLBCL unclassified	E	Balanced proliferative	non-mBL	LoGA	PAP-2	unclassified
MPI-684	DLBCL unclassified	none	NA	non-mBL	HiGA-PRO	PAP-2	unclassified
MPI-703	DLBCL unclassified	none	NA	non-mBL	HiGA-PRO	PAP-1	unclassified
MPI-762	DLBCL unclassified	F	Inflammatory	non-mBL		PAP-1	unclassified
MPI-714	DLBCL unclassified	H	Weakly carcinogenic	non-mBL	HiGA-SIR	mind-L	unclassified
MPI-184	DLBCL unclassified	E J	Balanced proliferative	non-mBL	HiGA-PRO	PAP-1	unclassified
MPI-191	DLBCL unclassified	F	Inflammatory	non-mBL	HiGA-SIR	mind-L	unclassified
MPI-195	DLBCL unclassified	H	Weakly carcinogenic	non-mBL	LoGA	mind-L	unclassified
MPI-342	DLBCL unclassified	F	Inflammatory	non-mBL	HiGA-SIR	PAP-1	unclassified
MPI-598	DLBCL unclassified	F	Inflammatory	non-mBL	HiGA-SIR	PAP-1	unclassified
MPI-215	DLBCL Double-Hit	F	Inflammatory	non-mBL		mind-L	ABC
MPI-331	DLBCL Double-Hit	E	Balanced proliferative	non-mBL	HiGA-PRO	mind-L	ABC
MPI-210	DLBCL Double-Hit	none	NA	non-mBL	LoGA	PAP-1	ABC
MPI-334	DLBCL Double-Hit	none	NA	non-mBL	HiGA-PRO	PAP-3	ABC
MPI-074	DLBCL Double-Hit	none	NA	non-mBL	HiGA-PRO	mind-L	ABC
MPI-228	DLBCL Double-Hit	L	Weakly carcinogenic	non-mBL	LoGA	PAP-1	GCB
MPI-235	DLBCL Double-Hit	F G I	Inflammatory	non-mBL	HiGA-SIR	mind-L	GCB
MPI-237	DLBCL Double-Hit	E	Balanced proliferative	non-mBL	HiGA-PRO	PAP-3	GCB
MPI-096	DLBCL Double-Hit	F G	Inflammatory	non-mBL	HiGA-SIR	PAP-4	GCB
MPI-353	DLBCL Double-Hit	F	Inflammatory	non-mBL	HiGA-SIR	mind-L	GCB
MPI-748	DLBCL Double-Hit	A I	Weakly carcinogenic	non-mBL		PAP-1	GCB
MPI-229	DLBCL Double-Hit	L M	Weakly carcinogenic	non-mBL	LoGA	mind-L	GCB
MPI-768	DLBCL Double-Hit	F	Inflammatory	non-mBL		PAP-1	GCB
MPI-176	DLBCL Double-Hit	none	NA	non-mBL	LoGA	mind-L	GCB
MPI-389	DLBCL Double-Hit	F	Inflammatory	non-mBL	HiGA-SIR	PAP-1	unclassified
MPI-687	DLBCL Double-Hit	none	NA	non-mBL		PAP-1	unclassified
MPI-706	DLBCL Double-Hit	F	Inflammatory	non-mBL	HiGA-SIR	PAP-3	unclassified
MPI-414	DLBCL Double-Hit	F	Inflammatory	non-mBL	HiGA-SIR	PAP-1	unclassified
MPI-560	DLBCL Double-Hit	F	Inflammatory	non-mBL	HiGA-SIR	mind-L	unclassified
MPI-880	DLBCL Double-Hit	F G J	Inflammatory	non-mBL		PAP-1	unclassified
MPI-884	DLBCL Double-Hit	A	Proliferative	intermediate		mind-L	GCB
MPI-866	DLBCL Double-Hit	F I	Inflammatory	non-mBL		PAP-1	GCB
MPI-870	DLBCL Double-Hit	G	Balanced inflammatory	non-mBL		PAP-1	GCB
MPI-409	DLBCL Double-Hit	F G	Inflammatory	non-mBL		PAP-1	GCB
MPI-189	DLBCL Double-Hit	none	NA	non-mBL	LoGA	mind-L	GCB
MPI-634	DLBCL Double-Hit	F G	Inflammatory	non-mBL	HiGA-SIR	PAP-1	GCB
MPI-302	DLBCL Double-Hit	I	Inflammatory	intermediate	HiGA-SIR	PAP-4	GCB
MPI-885	DLBCL Double-Hit	A	Proliferative	mBL		BL-PAP	GCB
MPI-652	DLBCL Double-Hit	A	Proliferative	intermediate	LoGA	mind-L	GCB
MPI-028	DLBCL Double-Hit	A	Proliferative	mBL		BL-PAP	GCB
MPI-120	DLBCL Double-Hit	A	Proliferative	intermediate		mind-L	GCB
MPI-690	DLBCL Double-Hit	D	Proliferative	intermediate		BL-PAP	GCB
MPI-187	DLBCL Double-Hit	G	Balanced inflammatory	intermediate		mind-L	GCB
MPI-046	DLBCL Double-Hit	none	NA	intermediate	HiGA-PRO	PAP-3	GCB
MPI-320	DLBCL Double-Hit	none	NA	intermediate	HiGA-SIR	PAP-2	GCB
MPI-165	DLBCL Double-Hit	L	Weakly carcinogenic	intermediate	LoGA	mind-L	GCB
MPI-826	DLBCL Double-Hit	none	NA	intermediate		PAP-3	GCB
MPI-020	DLBCL Double-Hit	A B D	Proliferative	intermediate		BL-PAP	GCB
MPI-036	DLBCL Double-Hit	none	NA	intermediate		mind-L	GCB
MPI-407	DLBCL Double-Hit	A	Proliferative	intermediate		mind-L	GCB
MPI-051	DLBCL Double-Hit	D	Proliferative	intermediate		mind-L	GCB
MPI-058	DLBCL Double-Hit	none	NA	intermediate		PAP-3	GCB
MPI-112	DLBCL Double-Hit	G	Balanced inflammatory	intermediate		mind-L	GCB
MPI-565	DLBCL Double-Hit	D	Proliferative	intermediate		mind-L	GCB
MPI-162	DLBCL Double-Hit	A	Proliferative	intermediate	LoGA	mind-L	GCB
MPI-308	DLBCL Double-Hit	G	Balanced inflammatory	intermediate	HiGA-SIR	PAP-1	GCB
MPI-635	DLBCL Double-Hit	F I	Inflammatory	intermediate	HiGA-SIR	PAP-1	GCB
MPI-356	DLBCL Double-Hit	none	NA	intermediate	HiGA-PRO	PAP-3	GCB
MPI-121	DLBCL Double-Hit	none	NA	intermediate	HiGA-PRO	mind-L	GCB
MPI-423	DLBCL Double-Hit	A	Proliferative	intermediate	LoGA	mind-L	GCB
MPI-104	DLBCL Double-Hit	A	Proliferative	intermediate	HiGA-PRO	mind-L	GCB
MPI-387	DLBCL Double-Hit	A	Proliferative	intermediate		mind-L	GCB
MPI-698	DLBCL Double-Hit	A	Proliferative	intermediate		mind-L	GCB
MPI-701	DLBCL Double-Hit	none	NA	intermediate		mind-L	GCB
MPI-700	DLBCL Double-Hit	J	Weakly carcinogenic	intermediate		mind-L	GCB
MPI-248	DLBCL Double-Hit	A J	Balanced proliferative	intermediate	LoGA	mind-L	GCB
MPI-271	DLBCL Double-Hit	D	Proliferative	mBL		BL-PAP	unclassified
MPI-727	DLBCL Double-Hit	G	Balanced inflammatory	non-mBL		PAP-1	GCB
MPI-648	FL/DLBCL	F G	Inflammatory	non-mBL	HiGA-SIR	PAP-1	GCB
MPI-650	FL/DLBCL	L	Weakly carcinogenic	intermediate	LoGA	mind-L	GCB
MPI-655	FL/DLBCL	L	Weakly carcinogenic	non-mBL	LoGA	PAP-2	ABC
MPI-656	FL/DLBCL	L M	Weakly carcinogenic	intermediate	LoGA	PAP-2	GCB
MPI-811	FL/DLBCL	A I J	Balanced inflammatory	intermediate		PAP-4	GCB
MPI-412	FL/DLBCL	G	Balanced inflammatory	non-mBL	HiGA-SIR	PAP-1	unclassified
MPI-627	FL/DLBCL	A D	Proliferative	mBL		BL-PAP	GCB
MPI-724	FL/DLBCL	E	Balanced proliferative	non-mBL	HiGA-PRO	PAP-4	GCB
MPI-760	FL/DLBCL	F G I J	Inflammatory	non-mBL		PAP-4	unclassified
MPI-853	FL/DLBCL	A I J	Balanced inflammatory	intermediate		PAP-4	GCB
MPI-252	FL/DLBCL	G	Balanced inflammatory	non-mBL		PAP-3	ABC
MPI-262	FL/DLBCL	I L	Weakly carcinogenic	intermediate		mind-L	GCB
MPI-513	FL/DLBCL	J	Weakly carcinogenic	non-mBL		PAP-1	GCB
MPI-567	FL/DLBCL	none	NA	intermediate		PAP-1	GCB
MPI-649	FL/DLBCL	none	NA	non-mBL		PAP-1	unclassified
MPI-660	FL/DLBCL	I	Inflammatory	non-mBL		PAP-1	GCB
MPI-663	FL/DLBCL	J	Weakly carcinogenic	non-mBL	HiGA-PRO	PAP-1	ABC
MPI-665	FL/DLBCL	J	Weakly carcinogenic	intermediate		PAP-4	ABC
MPI-667	FL/DLBCL	G L	Balanced inflammatory	non-mBL		PAP-1	GCB
MPI-721	FL/DLBCL	A	Proliferative	intermediate		PAP-3	GCB
MPI-744	FL/DLBCL	none	NA	non-mBL		PAP-2	GCB
MPI-817	FL/DLBCL	none	NA	intermediate		PAP-1	GCB
MPI-854	FL/DLBCL	none	NA	non-mBL		PAP-4	unclassified
MPI-644	FL/DLBCL	A I	Weakly carcinogenic	non-mBL	HiGA-SIR	PAP-1	GCB
MPI-708	FL/DLBCL	F G I	Inflammatory	non-mBL	LoGA	PAP-1	ABC
MPI-723	FL/DLBCL	none	NA	non-mBL	HiGA-PRO	PAP-4	GCB
MPI-890	FL/DLBCL	F I	Inflammatory	non-mBL		PAP-1	unclassified
MPI-788	FL/DLBCL	none	NA	non-mBL		PAP-1	GCB
MPI-894	FL/DLBCL	G I J	Balanced inflammatory	non-mBL		PAP-1	GCB
MPI-453	FL/DLBCL	none	NA	non-mBL	LoGA	PAP-2	ABC
MPI-298	FL/DLBCL	G I J	Balanced inflammatory	non-mBL		PAP-1	GCB
MPI-251	FL/DLBCL	G I	Balanced inflammatory	non-mBL	HiGA-SIR	PAP-4	unclassified
MPI-503	FL/DLBCL	I J	Inflammatory	non-mBL		PAP-1	unclassified
MPI-713	FL/DLBCL	F G	Inflammatory	non-mBL	HiGA-SIR	PAP-4	GCB
MPI-443	FL/DLBCL	F G I	Inflammatory	non-mBL	HiGA-SIR	mind-L	ABC
MPI-400	FL/DLBCL	G	Balanced inflammatory	non-mBL	HiGA-SIR	PAP-1	GCB
MPI-637	FL/DLBCL	G	Balanced inflammatory	non-mBL	LoGA	PAP-1	GCB
MPI-646	FL/DLBCL	none	NA	non-mBL	LoGA	mind-L	GCB
MPI-804	FL/DLBCL	I	Inflammatory	non-mBL		PAP-4	unclassified
MPI-647	FL/DLBCL	F G I	Inflammatory	non-mBL	HiGA-SIR	PAP-1	GCB
MPI-630	FL/DLBCL	A I J	Balanced inflammatory	intermediate		PAP-1	GCB
MPI-814	FL/DLBCL	none	NA	non-mBL		mind-L	GCB
MPI-281	FL/DLBCL	F	Inflammatory	non-mBL	HiGA-SIR	PAP-4	unclassified
MPI-555	FL/DLBCL	F G	Inflammatory	non-mBL	HiGA-SIR	PAP-1	GCB
MPI-651	FL/DLBCL	G	Balanced inflammatory	intermediate	HiGA-PRO	PAP-4	GCB
MPI-898	FL/DLBCL	F G I	Inflammatory	non-mBL		PAP-1	GCB
MPI-641	FL/DLBCL	none	NA	non-mBL	HiGA-SIR	PAP-4	GCB
MPI-193	FL/DLBCL	B C D	Balanced proliferative	intermediate	LoGA	mind-L	GCB
MPI-267	FL BCL2-break NA	A I	Weakly carcinogenic	intermediate		PAP-4	unclassified
MPI-258	FL BCL2-break NA	F I	Inflammatory	non-mBL		PAP-4	GCB
MPI-431	FL BCL2-break neg	G I	Balanced inflammatory	intermediate		PAP-4	GCB
MPI-450	FL BCL2-break neg	G I J	Balanced inflammatory	non-mBL		PAP-1	GCB
MPI-457	FL BCL2-break neg	I	Inflammatory	non-mBL		PAP-1	GCB
MPI-464	FL BCL2-break neg	A I	Weakly carcinogenic	non-mBL		PAP-1	GCB
MPI-517	FL BCL2-break neg	none	NA	intermediate		mind-L	GCB
MPI-519	FL BCL2-break neg	I	Inflammatory	non-mBL		PAP-1	GCB
MPI-602	FL BCL2-break neg	I L	Weakly carcinogenic	non-mBL		mind-L	GCB
MPI-631	FL BCL2-break neg	F G I J	Inflammatory	non-mBL		PAP-1	unclassified
MPI-886	FL BCL2-break neg	F G I J	Inflammatory	non-mBL		PAP-1	ABC
MPI-878	FL BCL2-break neg	F	Inflammatory	non-mBL		PAP-1	GCB
MPI-392	FL BCL2-break neg	I	Inflammatory	non-mBL		PAP-1	GCB
MPI-522	FL BCL2-break neg	I	Inflammatory	non-mBL		PAP-1	GCB
MPI-561	FL BCL2-break neg	A	Proliferative	intermediate		BL-PAP	GCB
MPI-601	FL BCL2-break neg	L M	Weakly carcinogenic	non-mBL		mind-L	GCB
MPI-603	FL BCL2-break neg	I L	Weakly carcinogenic	non-mBL		PAP-2	GCB
MPI-707	FL BCL2-break neg	L M	Weakly carcinogenic	intermediate		mind-L	unclassified
MPI-710	FL BCL2-break neg	G I J	Balanced inflammatory	non-mBL		PAP-1	unclassified
MPI-653	FL BCL2-break neg	I	Inflammatory	non-mBL		PAP-2	GCB
MPI-657	FL BCL2-break neg	F G I	Inflammatory	non-mBL	HiGA-SIR	PAP-1	unclassified
MPI-666	FL BCL2-break neg	L	Weakly carcinogenic	non-mBL		mind-L	GCB
MPI-711	FL BCL2-break neg	G	Balanced inflammatory	intermediate		PAP-4	unclassified
MPI-720	FL BCL2-break neg	none	NA	intermediate		PAP-4	unclassified
MPI-882	FL BCL2-break neg	F I	Inflammatory	non-mBL		PAP-1	ABC
MPI-451	FL BCL2-break neg	none	NA	non-mBL		PAP-2	unclassified
MPI-575	FL BCL2-break neg	G I	Balanced inflammatory	non-mBL		PAP-1	GCB
MPI-664	FL BCL2-break neg	F I	Inflammatory	non-mBL	HiGA-SIR	PAP-1	GCB
MPI-728	FL BCL2-break neg	A I	Weakly carcinogenic	intermediate		PAP-4	GCB
MPI-819	FL BCL2-break neg	F I	Inflammatory	non-mBL		PAP-1	unclassified
MPI-897	FL BCL2-break neg	F I	Inflammatory	non-mBL		PAP-1	ABC
MPI-256	FL BCL2-break pos	A I	Weakly carcinogenic	intermediate		PAP-4	GCB
MPI-257	FL BCL2-break pos	I	Inflammatory	non-mBL		PAP-1	GCB
MPI-260	FL BCL2-break pos	I	Inflammatory	non-mBL		PAP-2	GCB
MPI-263	FL BCL2-break pos	G I J	Balanced inflammatory	non-mBL		PAP-1	GCB
MPI-264	FL BCL2-break pos	A I	Weakly carcinogenic	non-mBL		PAP-4	GCB
MPI-265	FL BCL2-break pos	A I	Weakly carcinogenic	intermediate		mind-L	GCB
MPI-266	FL BCL2-break pos	A	Proliferative	intermediate		mind-L	GCB
MPI-268	FL BCL2-break pos	I	Inflammatory	intermediate		PAP-4	unclassified
MPI-283	FL BCL2-break pos	F I J	Inflammatory	non-mBL		PAP-1	GCB
MPI-307	FL BCL2-break pos	none	NA	non-mBL		PAP-2	GCB
MPI-425	FL BCL2-break pos	A I	Weakly carcinogenic	non-mBL		PAP-1	GCB
MPI-428	FL BCL2-break pos	A I J	Balanced inflammatory	intermediate		mind-L	GCB
MPI-429	FL BCL2-break pos	I	Inflammatory	non-mBL		PAP-2	GCB
MPI-432	FL BCL2-break pos	G I	Balanced inflammatory	non-mBL		PAP-1	GCB
MPI-444	FL BCL2-break pos	F I	Inflammatory	non-mBL		PAP-1	GCB
MPI-445	FL BCL2-break pos	I L	Weakly carcinogenic	non-mBL		PAP-2	GCB
MPI-446	FL BCL2-break pos	I L	Weakly carcinogenic	non-mBL		PAP-2	GCB
MPI-447	FL BCL2-break pos	F	Inflammatory	non-mBL		PAP-1	GCB
MPI-448	FL BCL2-break pos	I J	Inflammatory	non-mBL		PAP-1	GCB
MPI-449	FL BCL2-break pos	L	Weakly carcinogenic	non-mBL		mind-L	GCB
MPI-454	FL BCL2-break pos	I	Inflammatory	non-mBL		PAP-1	GCB
MPI-455	FL BCL2-break pos	L	Weakly carcinogenic	non-mBL		mind-L	GCB
MPI-456	FL BCL2-break pos	F I	Inflammatory	non-mBL		PAP-1	GCB
MPI-458	FL BCL2-break pos	A I	Weakly carcinogenic	intermediate		mind-L	GCB
MPI-459	FL BCL2-break pos	I	Inflammatory	non-mBL		PAP-1	GCB
MPI-460	FL BCL2-break pos	I J	Inflammatory	non-mBL		PAP-1	GCB
MPI-462	FL BCL2-break pos	I	Inflammatory	non-mBL		PAP-1	GCB
MPI-463	FL BCL2-break pos	I	Inflammatory	non-mBL		PAP-1	GCB
MPI-465	FL BCL2-break pos	I J	Inflammatory	intermediate		PAP-1	GCB
MPI-478	FL BCL2-break pos	A I J	Balanced inflammatory	non-mBL		PAP-2	GCB
MPI-480	FL BCL2-break pos	I	Inflammatory	intermediate		PAP-1	GCB
MPI-481	FL BCL2-break pos	I	Inflammatory	non-mBL		PAP-1	GCB
MPI-482	FL BCL2-break pos	F G I J	Inflammatory	non-mBL		PAP-1	GCB
MPI-504	FL BCL2-break pos	A I	Weakly carcinogenic	intermediate		PAP-4	GCB
MPI-506	FL BCL2-break pos	A I	Weakly carcinogenic	non-mBL		PAP-1	GCB
MPI-516	FL BCL2-break pos	I	Inflammatory	non-mBL		PAP-1	GCB
MPI-518	FL BCL2-break pos	A I	Weakly carcinogenic	intermediate		mind-L	GCB
MPI-520	FL BCL2-break pos	I L	Weakly carcinogenic	non-mBL		mind-L	GCB
MPI-521	FL BCL2-break pos	I	Inflammatory	non-mBL		mind-L	GCB
MPI-523	FL BCL2-break pos	I J	Inflammatory	non-mBL		PAP-1	GCB
MPI-524	FL BCL2-break pos	A I	Weakly carcinogenic	non-mBL		PAP-2	GCB
MPI-525	FL BCL2-break pos	I	Inflammatory	non-mBL		PAP-2	GCB
MPI-535	FL BCL2-break pos	I J	Inflammatory	non-mBL		PAP-1	GCB
MPI-604	FL BCL2-break pos	I L	Weakly carcinogenic	non-mBL		mind-L	GCB
MPI-633	FL BCL2-break pos	A I	Weakly carcinogenic	intermediate		PAP-1	GCB
MPI-770	FL BCL2-break pos	F I J	Inflammatory	non-mBL		PAP-1	GCB
MPI-772	FL BCL2-break pos	G I J	Balanced inflammatory	non-mBL		PAP-1	GCB
MPI-773	FL BCL2-break pos	A I	Weakly carcinogenic	non-mBL		PAP-2	GCB
MPI-775	FL BCL2-break pos	I	Inflammatory	non-mBL		PAP-1	unclassified
MPI-777	FL BCL2-break pos	I	Inflammatory	non-mBL		PAP-1	GCB
MPI-784	FL BCL2-break pos	I	Inflammatory	non-mBL		PAP-1	GCB
MPI-785	FL BCL2-break pos	I L	Weakly carcinogenic	non-mBL		mind-L	GCB
MPI-786	FL BCL2-break pos	I	Inflammatory	non-mBL		PAP-1	unclassified
MPI-787	FL BCL2-break pos	A I J	Balanced inflammatory	non-mBL		PAP-1	unclassified
MPI-872	FL BCL2-break pos	A I J	Balanced inflammatory	non-mBL		PAP-1	GCB
MPI-887	FL BCL2-break pos	F I J	Inflammatory	non-mBL		PAP-1	GCB
MPI-891	FL BCL2-break pos	I	Inflammatory	non-mBL		PAP-1	GCB
MPI-908	FL BCL2-break pos	I	Inflammatory	non-mBL		PAP-1	ABC
MPI-909	FL BCL2-break pos	A I J	Balanced inflammatory	non-mBL		PAP-1	unclassified
MPI-103	FL BCL2-break pos	none	NA	intermediate		mind-L	GCB
MPI-510	FL BCL2-break pos	A	Proliferative	non-mBL		mind-L	GCB
MPI-774	FL BCL2-break pos	I	Inflammatory	non-mBL		PAP-1	GCB
MPI-906	FL BCL2-break pos	I J	Inflammatory	non-mBL		PAP-1	ABC
MPI-907	FL BCL2-break pos	F G I	Inflammatory	non-mBL		PAP-4	GCB
MPI-259	FL BCL2-break pos	I J	Inflammatory	non-mBL		PAP-1	GCB
MPI-296	FL BCL2-break pos	I J	Inflammatory	non-mBL		PAP-4	unclassified
MPI-297	FL BCL2-break pos	G I J	Balanced inflammatory	non-mBL		PAP-1	GCB
MPI-426	FL BCL2-break pos	I	Inflammatory	non-mBL		PAP-1	GCB
MPI-433	FL BCL2-break pos	L	Weakly carcinogenic	non-mBL		mind-L	GCB
MPI-505	FL BCL2-break pos	F G I J	Inflammatory	non-mBL		PAP-1	unclassified
MPI-507	FL BCL2-break pos	I	Inflammatory	non-mBL		PAP-1	GCB
MPI-508	FL BCL2-break pos	G I	Balanced inflammatory	non-mBL		PAP-1	GCB
MPI-515	FL BCL2-break pos	none	NA	non-mBL		PAP-1	GCB
MPI-526	FL BCL2-break pos	F	Inflammatory	non-mBL		PAP-1	GCB
MPI-533	FL BCL2-break pos	I L	Weakly carcinogenic	non-mBL		PAP-1	GCB
MPI-536	FL BCL2-break pos	G I	Balanced inflammatory	non-mBL		PAP-1	GCB
MPI-600	FL BCL2-break pos	L M	Weakly carcinogenic	non-mBL		mind-L	GCB
MPI-629	FL BCL2-break pos	I	Inflammatory	non-mBL		PAP-1	GCB
MPI-668	FL BCL2-break pos	G L	Balanced inflammatory	non-mBL		mind-L	GCB
MPI-709	FL BCL2-break pos	I J	Inflammatory	non-mBL		PAP-1	unclassified
MPI-771	FL BCL2-break pos	I	Inflammatory	non-mBL		PAP-1	GCB
MPI-776	FL BCL2-break pos	I	Inflammatory	non-mBL		PAP-1	GCB
MPI-778	FL BCL2-break pos	A I J	Balanced inflammatory	non-mBL		PAP-1	GCB
MPI-779	FL BCL2-break pos	F I J	Inflammatory	non-mBL		PAP-1	GCB
MPI-828	FL BCL2-break pos	G I	Balanced inflammatory	non-mBL		PAP-1	GCB
MPI-868	FL BCL2-break pos	F I J	Inflammatory	non-mBL		PAP-1	unclassified
MPI-889	FL BCL2-break pos	I	Inflammatory	non-mBL		PAP-1	unclassified
MPI-903	FL BCL2-break pos	F G	Inflammatory	non-mBL		PAP-1	GCB
MPI-301	FL BCL2-break pos	I	Inflammatory	intermediate		PAP-1	GCB
MPI-461	FL BCL2-break pos	A I	Weakly carcinogenic	non-mBL		PAP-1	GCB
MPI-476	FL BCL2-break pos	G I	Balanced inflammatory	non-mBL		PAP-1	GCB
MPI-534	FL BCL2-break pos	I	Inflammatory	intermediate		mind-L	GCB
MPI-097	FL BCL2-break pos	F G I	Inflammatory	non-mBL		PAP-4	GCB
MPI-511	FL BCL2-break pos	none	NA	non-mBL		PAP-2	GCB
MPI-632	FL BCL2-break pos	A	Proliferative	intermediate		PAP-1	GCB
MPI-639	FL BCL2-break pos	I	Inflammatory	non-mBL		PAP-1	GCB
MPI-640	FL BCL2-break pos	I	Inflammatory	non-mBL		PAP-1	GCB
MPI-642	FL BCL2-break pos	A I	Weakly carcinogenic	intermediate		mind-L	GCB
MPI-643	FL BCL2-break pos	I	Inflammatory	non-mBL		PAP-1	GCB
MPI-658	FL BCL2-break pos	I	Inflammatory	non-mBL		PAP-1	GCB
MPI-659	FL BCL2-break pos	E	Balanced proliferative	non-mBL		PAP-4	GCB
MPI-712	FL BCL2-break pos	G I	Balanced inflammatory	intermediate		PAP-1	GCB
MPI-719	FL BCL2-break pos	G I	Balanced inflammatory	non-mBL		PAP-4	GCB
MPI-738	FL BCL2-break pos	F I	Inflammatory	non-mBL		PAP-4	GCB
MPI-867	FL BCL2-break pos	F I	Inflammatory	non-mBL		PAP-1	GCB
MPI-722	FL BCL2-break pos	I	Inflammatory	non-mBL		PAP-1	GCB
MPI-420	FL BCL2-break pos	I L	Weakly carcinogenic	non-mBL		PAP-2	GCB
MPI-477	FL BCL2-break pos	F I	Inflammatory	non-mBL		PAP-1	GCB
MPI-479	FL BCL2-break pos	F I	Inflammatory	non-mBL		PAP-1	GCB
MPI-636	FL BCL2-break pos	I J	Inflammatory	non-mBL		mind-L	GCB
MPI-729	FL BCL2-break pos	F G I	Inflammatory	non-mBL		mind-L	GCB
MPI-888	FL BCL2-break pos	F G I J	Inflammatory	non-mBL		PAP-1	GCB
MPI-896	FL BCL2-break pos	F G I J	Inflammatory	non-mBL		PAP-1	unclassified
MPI-871	FL BCL2-break pos	I	Inflammatory	non-mBL		PAP-1	GCB
MPI-197	PMBL	E G	Balanced proliferative	non-mBL		PAP-1	unclassified
MPI-217	PMBL	L M	Weakly carcinogenic	non-mBL	LoGA	PAP-2	GCB
MPI-218	PMBL	E G	Balanced proliferative	non-mBL		PAP-1	GCB
MPI-577	PMBL	none	NA	non-mBL		PAP-1	GCB
MPI-620	PMBL	G	Balanced inflammatory	non-mBL		PAP-1	GCB
MPI-670	PMBL	F G J	Inflammatory	non-mBL		PAP-1	GCB
MPI-671	PMBL	E	Balanced proliferative	non-mBL		PAP-1	GCB
MPI-672	PMBL	E F G	Inflammatory	non-mBL		PAP-1	GCB
MPI-673	PMBL	none	NA	non-mBL		PAP-1	GCB
MPI-674	PMBL	F G	Inflammatory	non-mBL		PAP-1	GCB
MPI-675	PMBL	F G	Inflammatory	non-mBL		PAP-1	GCB
MPI-676	PMBL	F G	Inflammatory	non-mBL		PAP-1	GCB
MPI-677	PMBL	L	Weakly carcinogenic	non-mBL		PAP-1	GCB
MPI-678	PMBL	E F G	Inflammatory	non-mBL		PAP-1	GCB
MPI-725	PMBL	F G	Inflammatory	non-mBL		PAP-1	GCB
MPI-726	PMBL	F G	Inflammatory	non-mBL		PAP-4	GCB
MPI-805	PMBL	F G	Inflammatory	non-mBL		mind-L	GCB
MPI-102	PMBL	none	NA	non-mBL		PAP-1	GCB
MPI-125	PMBL	F G	Inflammatory	non-mBL		PAP-1	unclassified
MPI-137	PMBL	F G	Inflammatory	non-mBL		PAP-1	GCB
MPI-693	PMBL	F G I J	Inflammatory	non-mBL	HiGA-SIR	PAP-1	GCB
MPI-717	PMBL	G	Balanced inflammatory	non-mBL		PAP-1	GCB
MPI-280	PMBL	E F G	Inflammatory	non-mBL		mind-L	GCB
MPI-682	multiple Myeloma	H	Weakly carcinogenic	intermediate		PAP-1	unclassified
MPI-681	multiple Myeloma	H	Weakly carcinogenic	non-mBL		mind-L	unclassified
MPI-683	multiple Myeloma	none	NA	non-mBL		mind-L	unclassified
MPI-715	multiple Myeloma	none	NA	non-mBL		PAP-1	ABC
MPI-758	multiple Myeloma	H	Weakly carcinogenic	non-mBL		mind-L	unclassified
MPI-759	multiple Myeloma	none	NA	non-mBL		PAP-1	GCB
MPI-824	multiple Myeloma	L	Weakly carcinogenic	intermediate		mind-L	GCB
MPI-825	multiple Myeloma	H	Weakly carcinogenic	non-mBL		mind-L	unclassified
MPI-829	multiple Myeloma	H	Weakly carcinogenic	non-mBL		mind-L	ABC
MPI-862	multiple Myeloma	G I J	Balanced inflammatory	non-mBL		PAP-2	ABC
MPI-466	multiple Myeloma	H L	Weakly carcinogenic	non-mBL		mind-L	unclassified
MPI-467	multiple Myeloma	H L	Weakly carcinogenic	non-mBL		mind-L	unclassified
MPI-468	multiple Myeloma	H L	Weakly carcinogenic	intermediate		mind-L	GCB
MPI-469	multiple Myeloma	H L	Weakly carcinogenic	non-mBL		mind-L	unclassified
MPI-470	multiple Myeloma	H L	Weakly carcinogenic	non-mBL		mind-L	unclassified
MPI-471	multiple Myeloma	H L	Weakly carcinogenic	non-mBL		mind-L	unclassified
MPI-472	multiple Myeloma	H L	Weakly carcinogenic	non-mBL		mind-L	unclassified
MPI-473	multiple Myeloma	H L	Weakly carcinogenic	non-mBL		mind-L	unclassified
MPI-474	multiple Myeloma	H L	Weakly carcinogenic	non-mBL		mind-L	ABC
MPI-106	multiple Myeloma	E F	Inflammatory	non-mBL	HiGA-PRO	mind-L	ABC
MPI-059	IRF4-break+ lymphoma	none	NA	intermediate	HiGA-PRO	mind-L	GCB
MPI-093	IRF4-break+ lymphoma	none	NA	intermediate	HiGA-SIR	PAP-4	GCB
MPI-124	IRF4-break+ lymphoma	E	Balanced proliferative	intermediate	HiGA-PRO	mind-L	unclassified
MPI-233	IRF4-break+ lymphoma	E	Balanced proliferative	non-mBL	HiGA-PRO	PAP-2	GCB
MPI-276	IRF4-break+ lymphoma	E J	Balanced proliferative	non-mBL	HiGA-PRO	mind-L	GCB
MPI-514	IRF4-break+ lymphoma	E G	Balanced proliferative	non-mBL	HiGA-SIR	PAP-1	GCB
MPI-571	IRF4-break+ lymphoma	none	NA	intermediate	HiGA-SIR	PAP-1	GCB
MPI-581	IRF4-break+ lymphoma	G	Balanced inflammatory	non-mBL	HiGA-PRO	PAP-1	GCB
MPI-584	IRF4-break+ lymphoma	G	Balanced inflammatory	non-mBL	LoGA	PAP-1	GCB
MPI-823	IRF4-break+ lymphoma	E	Balanced proliferative	non-mBL		PAP-3	unclassified
MPI-626	mnBLL-11q	A D	Proliferative	intermediate	HiGA-PRO	mind-L	GCB
MPI-382	mnBLL-11q	A	Proliferative	mBL		BL-PAP	GCB
MPI-315	mnBLL-11q	none	NA	intermediate	LoGA	PAP-1	GCB
MPI-148	mnBLL-11q	A B D	Proliferative	intermediate		BL-PAP	GCB
MPI-086	mnBLL-11q	A B D	Proliferative	mBL		BL-PAP	GCB
MPI-078	mnBLL-11q	D	Proliferative	mBL		mind-L	GCB
MPI-169	MCL	none	NA	intermediate	LoGA	mind-L	unclassified
MPI-422	MCL	I	Inflammatory	non-mBL		PAP-1	unclassified
MPI-430	MCL	none	NA	non-mBL		PAP-4	unclassified
MPI-452	MCL	I L	Weakly carcinogenic	non-mBL		PAP-2	unclassified
MPI-483	cell line BL	A B C D
MPI-487	cell line BL	A B C D
MPI-496	cell line BL	A B C D
MPI-498	cell line BL	B C D
MPI-605	cell line BL	A B C D
MPI-606	cell line BL	A B D
MPI-607	cell line BL	A B C D
MPI-608	cell line BL	A B C D
MPI-612	cell line BL	A B C D
MPI-613	cell line BL	A B C D
MPI-614	cell line BL	A B C D
MPI-484	cell line DH-BL	B C D
MPI-485	cell line DH-BL	A B C D
MPI-615	cell line mnBLL-11q	B C D
MPI-492	cell line Multiple Myeloma	B C D
MPI-497	cell line Multiple Myeloma	B C D
MPI-499	cell line Multiple Myeloma	B C D
MPI-502	cell line Multiple Myeloma	B C D
MPI-611	cell line non-BL, BCL	A B C D
MPI-486	cell line non-BL, DLBCL	A B C D
MPI-490	cell line non-BL, DLBCL	B C D
MPI-493	cell line non-BL, DLBCL	B C D
MPI-494	cell line non-BL, DLBCL	B C D
MPI-500	cell line non-BL, DLBCL	A B C D
MPI-501	cell line non-BL, DLBCL	A B C D
MPI-610	cell line non-BL, DLBCL	B C D
MPI-616	cell line non-BL, DLBCL	A B C D
MPI-609	cell line mnBLL-11q	A B C D
MPI-491	cell line non-BL, plasma cell myeloma	B C D
MPI-489	cell line non-BL, PMBL	B C D
MPI-495	cell line non-BL, PMBL	B C D
MPI-488	cell line non-BL, T-ALL	B C D
MPI-545	normal control	J K L M
MPI-910	normal control	A J
MPI-911	normal control	A J
MPI-912	normal control	A J
MPI-913	normal control	A J
MPI-914	normal control	A J
MPI-915	normal control	A J
MPI-916	normal control	A J
MPI-917	normal control	A J
MPI-918	normal control	A J
MPI-919	normal control	A J
MPI-920	normal control	A J
MPI-921	normal control	J
MPI-922	normal control	J
MPI-544	normal control	J K L M
MPI-930	normal control	J K L M
MPI-931	normal control	J K L M
MPI-932	normal control	J K L M
MPI-933	normal control	J K L M
MPI-934	normal control	J K L M
MPI-935	normal control	J K L M
MPI-936	normal control	J K L M
MPI-937	normal control	J K L M
MPI-923	normal control	J K L M
MPI-924	normal control	J K L M
MPI-925	normal control	J K L M
MPI-926	normal control	J K L M
MPI-927	normal control	J K L M
MPI-928	normal control	J K L M
MPI-929	normal control	J K L M
MPI-739	tonsil	F G I J
MPI-740	tonsil	I J
MPI-741	tonsil	I J
MPI-742	tonsil	I J
MPI-743	tonsil	I J
MPI-750	tonsil	G I J
MPI-751	tonsil	I J
MPI-752	tonsil	I J
MPI-753	tonsil	I J
MPI-754	tonsil	I J
