# Supplementary material for: A modular transcriptome map of mature B cell lymphomas
Source: Genome Med. 2019 Apr 30;11:27. doi: 10.1186/s13073-019-0637-7 (PMC6492344; doi:10.1186/s13073-019-0637-7)
Supplement: Supplementary file 4 — Lists of genes for each of the spot modules. (XLSX 256 kb) [file 13073_2019_637_MOESM4_ESM.xlsx]

## Sheet: Module A
ID	Symbol	Metagene	Chromosome	Description
206660_at	IGLL1	47 x 1	22 q11	immunoglobulin lambda like polypeptide 1 [Source:HGNC Symbol;Acc:HGNC:5870]
209789_at	CORO2B	50 x 1	15 q23	coronin 2B [Source:HGNC Symbol;Acc:HGNC:2256]
219655_at	SUGCT	50 x 2	7 p14	succinyl-CoA:glutarate-CoA transferase [Source:HGNC Symbol;Acc:HGNC:16001]
220448_at	KCNK12	50 x 2	2 p16	potassium two pore domain channel subfamily K member 12 [Source:HGNC Symbol;Acc:HGNC:6274]
214243_s_at	SERHL	50 x 1	22 q13	serine hydrolase-like (pseudogene) [Source:HGNC Symbol;Acc:HGNC:14408]
218980_at	FHOD3	49 x 1	18 q12	formin homology 2 domain containing 3 [Source:HGNC Symbol;Acc:HGNC:26178]
206413_s_at	TCL1B	50 x 1	14 q32	T-cell leukemia/lymphoma 1B [Source:HGNC Symbol;Acc:HGNC:11649]
219737_s_at	PCDH9	50 x 1	13 q21	protocadherin 9 [Source:HGNC Symbol;Acc:HGNC:8661]
220432_s_at	CYP39A1	50 x 1	6 p12	cytochrome P450 family 39 subfamily A member 1 [Source:HGNC Symbol;Acc:HGNC:17449]
203919_at	TCEA2	47 x 1	20 q13	transcription elongation factor A2 [Source:HGNC Symbol;Acc:HGNC:11614]
211259_s_at	BMP7	49 x 1	20 q13	bone morphogenetic protein 7 [Source:HGNC Symbol;Acc:HGNC:1074]
203769_s_at	STS	47 x 1	X p22	steroid sulfatase [Source:HGNC Symbol;Acc:HGNC:11425]
209590_at	BMP7	50 x 1	20 q13	bone morphogenetic protein 7 [Source:HGNC Symbol;Acc:HGNC:1074]
213996_at	YPEL1	49 x 1	22 q11	yippee like 1 [Source:HGNC Symbol;Acc:HGNC:12845]
214023_x_at	TUBB2B	50 x 1	6 p25	tubulin beta 2B class IIb [Source:HGNC Symbol;Acc:HGNC:30829]
204409_s_at	EIF1AY	50 x 1	Y q11	eukaryotic translation initiation factor 1A, Y-linked [Source:HGNC Symbol;Acc:HGNC:3252]
201387_s_at	UCHL1	50 x 1	4 p13	ubiquitin C-terminal hydrolase L1 [Source:HGNC Symbol;Acc:HGNC:12513]
209441_at	RHOBTB2	50 x 2	8 p21	Rho related BTB domain containing 2 [Source:HGNC Symbol;Acc:HGNC:18756]
217276_x_at	SERHL	49 x 1	22 q13	serine hydrolase-like (pseudogene) [Source:HGNC Symbol;Acc:HGNC:14408]
207399_at	BFSP2	49 x 2	3 q22	beaded filament structural protein 2 [Source:HGNC Symbol;Acc:HGNC:1041]
203516_at	SNTA1	48 x 1	20 q11	syntrophin alpha 1 [Source:HGNC Symbol;Acc:HGNC:11167]
206864_s_at	HRK	50 x 1	12 q24	harakiri, BCL2 interacting protein [Source:HGNC Symbol;Acc:HGNC:5185]
209591_s_at	BMP7	50 x 1	20 q13	bone morphogenetic protein 7 [Source:HGNC Symbol;Acc:HGNC:1074]
219355_at	CXorf57	49 x 1	X q22	chromosome X open reading frame 57 [Source:HGNC Symbol;Acc:HGNC:25486]
206624_at	USP9Y	50 x 1	Y q11	ubiquitin specific peptidase 9, Y-linked [Source:HGNC Symbol;Acc:HGNC:12633]
205000_at	DDX3Y	50 x 1	Y q11	DEAD-box helicase 3, Y-linked [Source:HGNC Symbol;Acc:HGNC:2699]
206700_s_at	KDM5D	50 x 1	Y q11	lysine demethylase 5D [Source:HGNC Symbol;Acc:HGNC:11115]
212503_s_at	DIP2C	50 x 1	10 p15	disco interacting protein 2 homolog C [Source:HGNC Symbol;Acc:HGNC:29150]
206641_at	TNFRSF17	50 x 1	16 p13	TNF receptor superfamily member 17 [Source:HGNC Symbol;Acc:HGNC:11913]
212719_at	PHLPP1	49 x 1	18 q21	PH domain and leucine rich repeat protein phosphatase 1 [Source:HGNC Symbol;Acc:HGNC:20610]
219396_s_at	NEIL1	50 x 1	15 q24	nei like DNA glycosylase 1 [Source:HGNC Symbol;Acc:HGNC:18448]
203434_s_at	MME	50 x 1	3 q25	membrane metalloendopeptidase [Source:HGNC Symbol;Acc:HGNC:7154]
206865_at	HRK	47 x 1	12 q24	harakiri, BCL2 interacting protein [Source:HGNC Symbol;Acc:HGNC:5185]
208806_at	CHD3	48 x 2	17 p13	chromodomain helicase DNA binding protein 3 [Source:HGNC Symbol;Acc:HGNC:1918]
218418_s_at	KANK2	49 x 1	19 p13	KN motif and ankyrin repeat domains 2 [Source:HGNC Symbol;Acc:HGNC:29300]
214366_s_at	ALOX5	50 x 2	10 q11	arachidonate 5-lipoxygenase [Source:HGNC Symbol;Acc:HGNC:435]
221624_at	TCL6	48 x 1	14 q32	T-cell leukemia/lymphoma 6 (non-protein coding) [Source:HGNC Symbol;Acc:HGNC:13463]
201909_at	RPS4Y1	50 x 1	Y p11	ribosomal protein S4, Y-linked 1 [Source:HGNC Symbol;Acc:HGNC:10425]
207216_at	TNFSF8	49 x 2	9 q33	tumor necrosis factor superfamily member 8 [Source:HGNC Symbol;Acc:HGNC:11938]
209558_s_at	HIP1R	50 x 1	12 q24	huntingtin interacting protein 1 related [Source:HGNC Symbol;Acc:HGNC:18415]
202561_at	TNKS	50 x 2	8 p23	tankyrase [Source:HGNC Symbol;Acc:HGNC:11941]
212985_at	APBB2	48 x 1	4 p13	amyloid beta precursor protein binding family B member 2 [Source:HGNC Symbol;Acc:HGNC:582]
204410_at	EIF1AY	50 x 1	Y q11	eukaryotic translation initiation factor 1A, Y-linked [Source:HGNC Symbol;Acc:HGNC:3252]
212599_at	AUTS2	50 x 1	7 q11	AUTS2, activator of transcription and developmental regulator [Source:HGNC Symbol;Acc:HGNC:14262]
201691_s_at	TPD52	50 x 1	8 q21	tumor protein D52 [Source:HGNC Symbol;Acc:HGNC:12005]
204688_at	SGCE	47 x 1	7 q21	sarcoglycan epsilon [Source:HGNC Symbol;Acc:HGNC:10808]
209995_s_at	TCL1A	50 x 2	14 q32	T-cell leukemia/lymphoma 1A [Source:HGNC Symbol;Acc:HGNC:11648]
214775_at	N4BP3	48 x 1	5 q35	NEDD4 binding protein 3 [Source:HGNC Symbol;Acc:HGNC:29852]
204680_s_at	RAPGEF5	48 x 1	7 p15	Rap guanine nucleotide exchange factor 5 [Source:HGNC Symbol;Acc:HGNC:16862]
213906_at	MYBL1	50 x 1	8 q13	MYB proto-oncogene like 1 [Source:HGNC Symbol;Acc:HGNC:7547]
221908_at	RNFT2	47 x 1	12 q24	ring finger protein, transmembrane 2 [Source:HGNC Symbol;Acc:HGNC:25905]
204686_at	IRS1	50 x 1	2 q36	insulin receptor substrate 1 [Source:HGNC Symbol;Acc:HGNC:6125]
204681_s_at	RAPGEF5	50 x 1	7 p15	Rap guanine nucleotide exchange factor 5 [Source:HGNC Symbol;Acc:HGNC:16862]
201677_at	HMCES	50 x 1	3 q21	5-hydroxymethylcytosine binding, ES cell specific [Source:HGNC Symbol;Acc:HGNC:24446]
211502_s_at	CDK14	50 x 1	7 q21	cyclin dependent kinase 14 [Source:HGNC Symbol;Acc:HGNC:8883]
212094_at	PEG10	50 x 1	7 q21	paternally expressed 10 [Source:HGNC Symbol;Acc:HGNC:14005]
212812_at	SERINC5	47 x 1	5 q14	serine incorporator 5 [Source:HGNC Symbol;Acc:HGNC:18825]
213005_s_at	KANK1	50 x 1	9 p24	KN motif and ankyrin repeat domains 1 [Source:HGNC Symbol;Acc:HGNC:19309]
203608_at	ALDH5A1	48 x 1	6 p22	aldehyde dehydrogenase 5 family member A1 [Source:HGNC Symbol;Acc:HGNC:408]
204141_at	TUBB2A	50 x 1	6 p25	tubulin beta 2A class IIa [Source:HGNC Symbol;Acc:HGNC:12412]
40148_at	APBB2	48 x 1	4 p13	amyloid beta precursor protein binding family B member 2 [Source:HGNC Symbol;Acc:HGNC:582]
210829_s_at	SSBP2	50 x 1	5 q14	single stranded DNA binding protein 2 [Source:HGNC Symbol;Acc:HGNC:15831]
220068_at	VPREB3	50 x 2	22 q11	pre-B lymphocyte 3 [Source:HGNC Symbol;Acc:HGNC:12710]
219840_s_at	TCL6	50 x 1	14 q32	T-cell leukemia/lymphoma 6 (non-protein coding) [Source:HGNC Symbol;Acc:HGNC:13463]
213093_at	PRKCA	49 x 1	17 q24	protein kinase C alpha [Source:HGNC Symbol;Acc:HGNC:9393]
218862_at	ASB13	50 x 1	10 p15	ankyrin repeat and SOCS box containing 13 [Source:HGNC Symbol;Acc:HGNC:19765]
206896_s_at	GNG7	50 x 1	19 p13	G protein subunit gamma 7 [Source:HGNC Symbol;Acc:HGNC:4410]
221234_s_at	BACH2	50 x 2	6 q15	BTB domain and CNC homolog 2 [Source:HGNC Symbol;Acc:HGNC:14078]
202367_at	CUX1	50 x 1	7 q22	cut like homeobox 1 [Source:HGNC Symbol;Acc:HGNC:2557]
219646_at	DEF8	50 x 1	16 q24	differentially expressed in FDCP 8 homolog [Source:HGNC Symbol;Acc:HGNC:25969]
221558_s_at	LEF1	47 x 1	4 q25	lymphoid enhancer binding factor 1 [Source:HGNC Symbol;Acc:HGNC:6551]
212655_at	ZCCHC14	48 x 1	16 q24	zinc finger CCHC-type containing 14 [Source:HGNC Symbol;Acc:HGNC:24134]
218988_at	SLC35E3	47 x 1	12 q15	solute carrier family 35 member E3 [Source:HGNC Symbol;Acc:HGNC:20864]
39318_at	TCL1A	50 x 2	14 q32	T-cell leukemia/lymphoma 1A [Source:HGNC Symbol;Acc:HGNC:11648]
203787_at	SSBP2	50 x 1	5 q14	single stranded DNA binding protein 2 [Source:HGNC Symbol;Acc:HGNC:15831]
203796_s_at	BCL7A	50 x 1	12 q24	BCL tumor suppressor 7A [Source:HGNC Symbol;Acc:HGNC:1004]
212970_at	APBB2	48 x 1	4 p13	amyloid beta precursor protein binding family B member 2 [Source:HGNC Symbol;Acc:HGNC:582]
203435_s_at	MME	50 x 1	3 q25	membrane metalloendopeptidase [Source:HGNC Symbol;Acc:HGNC:7154]
212504_at	DIP2C	50 x 1	10 p15	disco interacting protein 2 homolog C [Source:HGNC Symbol;Acc:HGNC:29150]
216060_s_at	DAAM1	50 x 2	14 q23	dishevelled associated activator of morphogenesis 1 [Source:HGNC Symbol;Acc:HGNC:18142]
218696_at	EIF2AK3	50 x 1	2 p11	eukaryotic translation initiation factor 2 alpha kinase 3 [Source:HGNC Symbol;Acc:HGNC:3255]
213899_at	METAP2	47 x 1	12 q22	methionyl aminopeptidase 2 [Source:HGNC Symbol;Acc:HGNC:16672]
212458_at	SPRED2	50 x 1	2 p14	sprouty related EVH1 domain containing 2 [Source:HGNC Symbol;Acc:HGNC:17722]
219839_x_at	TCL6	48 x 1	14 q32	T-cell leukemia/lymphoma 6 (non-protein coding) [Source:HGNC Symbol;Acc:HGNC:13463]
212592_at	JCHAIN	50 x 1	4 q13	joining chain of multimeric IgA and IgM [Source:HGNC Symbol;Acc:HGNC:5713]
206105_at	AFF2	50 x 1	X q28	AF4/FMR2 family member 2 [Source:HGNC Symbol;Acc:HGNC:3776]
38340_at	HIP1R	50 x 1	12 q24	huntingtin interacting protein 1 related [Source:HGNC Symbol;Acc:HGNC:18415]
220917_s_at	WDR19	50 x 1	4 p14	WD repeat domain 19 [Source:HGNC Symbol;Acc:HGNC:18340]
203285_s_at	HS2ST1	49 x 1	1 p22	heparan sulfate 2-O-sulfotransferase 1 [Source:HGNC Symbol;Acc:HGNC:5193]
204867_at	GCHFR	49 x 2	15 q15	GTP cyclohydrolase I feedback regulator [Source:HGNC Symbol;Acc:HGNC:4194]
217824_at	UBE2J1	50 x 1	6 q15	ubiquitin conjugating enzyme E2 J1 [Source:HGNC Symbol;Acc:HGNC:17598]
204207_s_at	RNGTT	50 x 1	6 q15	RNA guanylyltransferase and 5'-phosphatase [Source:HGNC Symbol;Acc:HGNC:10073]
214820_at	BRWD1	49 x 2	21 q22	bromodomain and WD repeat domain containing 1 [Source:HGNC Symbol;Acc:HGNC:12760]
204445_s_at	ALOX5	50 x 2	10 q11	arachidonate 5-lipoxygenase [Source:HGNC Symbol;Acc:HGNC:435]
214743_at	CUX1	50 x 1	7 q22	cut like homeobox 1 [Source:HGNC Symbol;Acc:HGNC:2557]
209431_s_at	PATZ1	48 x 1	22 q12	POZ/BTB and AT hook containing zinc finger 1 [Source:HGNC Symbol;Acc:HGNC:13071]
204208_at	RNGTT	50 x 2	6 q15	RNA guanylyltransferase and 5'-phosphatase [Source:HGNC Symbol;Acc:HGNC:10073]
202729_s_at	LTBP1	49 x 1	2 p22	latent transforming growth factor beta binding protein 1 [Source:HGNC Symbol;Acc:HGNC:6714]
205760_s_at	OGG1	50 x 2	3 p25	8-oxoguanine DNA glycosylase [Source:HGNC Symbol;Acc:HGNC:8125]
204446_s_at	ALOX5	50 x 2	10 q11	arachidonate 5-lipoxygenase [Source:HGNC Symbol;Acc:HGNC:435]
201678_s_at	HMCES	50 x 1	3 q21	5-hydroxymethylcytosine binding, ES cell specific [Source:HGNC Symbol;Acc:HGNC:24446]
208021_s_at	RFC1	47 x 1	4 p14	replication factor C subunit 1 [Source:HGNC Symbol;Acc:HGNC:9969]
216080_s_at	FADS3	50 x 2	11 q12	fatty acid desaturase 3 [Source:HGNC Symbol;Acc:HGNC:3576]
218723_s_at	RGCC	50 x 1	13 q14	regulator of cell cycle [Source:HGNC Symbol;Acc:HGNC:20369]
204004_at	PAWR	47 x 1	12 q21	pro-apoptotic WT1 regulator [Source:HGNC Symbol;Acc:HGNC:8614]
211596_s_at	LRIG1	48 x 1	3 p14	leucine rich repeats and immunoglobulin like domains 1 [Source:HGNC Symbol;Acc:HGNC:17360]
208072_s_at	DGKD	50 x 1	2 q37	diacylglycerol kinase delta [Source:HGNC Symbol;Acc:HGNC:2851]
203244_at	PEX5	48 x 1	12 p13	peroxisomal biogenesis factor 5 [Source:HGNC Symbol;Acc:HGNC:9719]
217825_s_at	UBE2J1	47 x 1	6 q15	ubiquitin conjugating enzyme E2 J1 [Source:HGNC Symbol;Acc:HGNC:17598]
203795_s_at	BCL7A	50 x 2	12 q24	BCL tumor suppressor 7A [Source:HGNC Symbol;Acc:HGNC:1004]
205367_at	SH2B2	50 x 1	7 q22	SH2B adaptor protein 2 [Source:HGNC Symbol;Acc:HGNC:17381]
204604_at	CDK14	50 x 1	7 q21	cyclin dependent kinase 14 [Source:HGNC Symbol;Acc:HGNC:8883]
219641_at	DET1	47 x 1	15 q26	de-etiolated homolog 1 (Arabidopsis) [Source:HGNC Symbol;Acc:HGNC:25477]
219551_at	EAF2	50 x 1	3 q13	ELL associated factor 2 [Source:HGNC Symbol;Acc:HGNC:23115]
221586_s_at	E2F5	49 x 2	8 q21	E2F transcription factor 5 [Source:HGNC Symbol;Acc:HGNC:3119]
201688_s_at	TPD52	50 x 1	8 q21	tumor protein D52 [Source:HGNC Symbol;Acc:HGNC:12005]
206833_s_at	ACYP2	49 x 2	2 p16	acylphosphatase 2 [Source:HGNC Symbol;Acc:HGNC:180]
219109_at	SPAG16	48 x 1	2 q34	sperm associated antigen 16 [Source:HGNC Symbol;Acc:HGNC:23225]
204257_at	FADS3	50 x 2	11 q12	fatty acid desaturase 3 [Source:HGNC Symbol;Acc:HGNC:3576]
204012_s_at	LCMT2	47 x 1	15 q15	leucine carboxyl methyltransferase 2 [Source:HGNC Symbol;Acc:HGNC:17558]
201689_s_at	TPD52	50 x 1	8 q21	tumor protein D52 [Source:HGNC Symbol;Acc:HGNC:12005]
201690_s_at	TPD52	50 x 1	8 q21	tumor protein D52 [Source:HGNC Symbol;Acc:HGNC:12005]
218331_s_at	FAM208B	47 x 1	10 p15	family with sequence similarity 208 member B [Source:HGNC Symbol;Acc:HGNC:23484]
217914_at	TPCN1	50 x 1	12 q24	two pore segment channel 1 [Source:HGNC Symbol;Acc:HGNC:18182]
211228_s_at	RAD17	47 x 1	5 q13	RAD17 checkpoint clamp loader component [Source:HGNC Symbol;Acc:HGNC:9807]

## Sheet: Module B
ID	Symbol	Metagene	Chromosome	Description
AFFX-r2-Hs28SrRNA-5_at		36 x 1
AFFX-r2-Hs18SrRNA-M_x_at		36 x 1
AFFX-M27830_5_at		36 x 1
AFFX-r2-Hs18SrRNA-5_at		36 x 1
AFFX-HUMRGE/M10098_M_at		36 x 1
210587_at	INHBE	32 x 1	12 q13	inhibin beta E subunit [Source:HGNC Symbol;Acc:HGNC:24029]
221920_s_at	SLC25A37	36 x 1	8 p21	solute carrier family 25 member 37 [Source:HGNC Symbol;Acc:HGNC:29786]
212816_s_at	CBSL	33 x 1	21 p12	cystathionine-beta-synthase like [Source:HGNC Symbol;Acc:HGNC:51829]
220595_at	PDZRN4	36 x 1	12 q12	PDZ domain containing ring finger 4 [Source:HGNC Symbol;Acc:HGNC:30552]
216054_x_at	MYL4	31 x 1	17 q21	myosin light chain 4 [Source:HGNC Symbol;Acc:HGNC:7585]
204913_s_at	SOX11	37 x 1	2 p25	SRY-box 11 [Source:HGNC Symbol;Acc:HGNC:11191]
211743_s_at		30 x 1	11 q12
205123_s_at		36 x 1	9 q31	MSANTD3-TMEFF1 readthrough [Source:HGNC Symbol;Acc:HGNC:38838]
204914_s_at	SOX11	37 x 1	2 p25	SRY-box 11 [Source:HGNC Symbol;Acc:HGNC:11191]
204915_s_at	SOX11	37 x 1	2 p25	SRY-box 11 [Source:HGNC Symbol;Acc:HGNC:11191]
213959_s_at	RPGRIP1L	31 x 1	16 q12	RPGRIP1 like [Source:HGNC Symbol;Acc:HGNC:29168]
205122_at		36 x 1	9 q31	MSANTD3-TMEFF1 readthrough [Source:HGNC Symbol;Acc:HGNC:38838]
37512_at	HSD17B6	32 x 1	12 q13	hydroxysteroid 17-beta dehydrogenase 6 [Source:HGNC Symbol;Acc:HGNC:23316]
47550_at	LZTS1	36 x 1	8 p21	leucine zipper tumor suppressor 1 [Source:HGNC Symbol;Acc:HGNC:13861]
210395_x_at	MYL4	30 x 1	17 q21	myosin light chain 4 [Source:HGNC Symbol;Acc:HGNC:7585]
210088_x_at	MYL4	30 x 1	17 q21	myosin light chain 4 [Source:HGNC Symbol;Acc:HGNC:7585]
215068_s_at	FBXL18	30 x 1	7 p22	F-box and leucine rich repeat protein 18 [Source:HGNC Symbol;Acc:HGNC:21874]
205830_at	CLGN	36 x 1	4 q31	calmegin [Source:HGNC Symbol;Acc:HGNC:2060]
213920_at	CUX2	36 x 1	12 q24	cut like homeobox 2 [Source:HGNC Symbol;Acc:HGNC:19347]
210036_s_at	KCNH2	37 x 1	7 q36	potassium voltage-gated channel subfamily H member 2 [Source:HGNC Symbol;Acc:HGNC:6251]
219042_at	LZTS1	37 x 1	8 p21	leucine zipper tumor suppressor 1 [Source:HGNC Symbol;Acc:HGNC:13861]
213533_at	NSG1	37 x 1	4 p16	Neuron-specific protein family member 1 [Source:UniProtKB/Swiss-Prot;Acc:P42857]
220351_at	ACKR4	37 x 1	3 q22	atypical chemokine receptor 4 [Source:HGNC Symbol;Acc:HGNC:1611]
205190_at	PLS1	35 x 1	3 q23	plastin 1 [Source:HGNC Symbol;Acc:HGNC:9090]
38037_at	HBEGF	36 x 1	5 q31	heparin binding EGF like growth factor [Source:HGNC Symbol;Acc:HGNC:3059]
214930_at	SLITRK5	37 x 1	13 q31	SLIT and NTRK like family member 5 [Source:HGNC Symbol;Acc:HGNC:20295]
207746_at		35 x 1
203821_at	HBEGF	36 x 1	5 q31	heparin binding EGF like growth factor [Source:HGNC Symbol;Acc:HGNC:3059]
207199_at	TERT	37 x 1	5 p15	telomerase reverse transcriptase [Source:HGNC Symbol;Acc:HGNC:11730]
210640_s_at	GPER1	35 x 1	7 p22	G protein-coupled estrogen receptor 1 [Source:HGNC Symbol;Acc:HGNC:4485]
209570_s_at	NSG1	37 x 1	4 p16	Neuron-specific protein family member 1 [Source:UniProtKB/Swiss-Prot;Acc:P42857]
213601_at	SLIT1	31 x 2	10 q24	slit guidance ligand 1 [Source:HGNC Symbol;Acc:HGNC:11085]
213435_at	SATB2	36 x 1	2 q33	SATB homeobox 2 [Source:HGNC Symbol;Acc:HGNC:21637]
209859_at	TRIM9	34 x 3	14 q22	tripartite motif containing 9 [Source:HGNC Symbol;Acc:HGNC:16288]
220459_at	MCM3AP-AS1	35 x 1	21 q22	MCM3AP antisense RNA 1 [Source:HGNC Symbol;Acc:HGNC:16417]
215554_at	GPLD1	37 x 1	6 p22	glycosylphosphatidylinositol specific phospholipase D1 [Source:HGNC Symbol;Acc:HGNC:4459]
217690_at	ENOSF1	34 x 1	18 p11	enolase superfamily member 1 [Source:HGNC Symbol;Acc:HGNC:30365]
220668_s_at	DNMT3B	36 x 1	20 q11	DNA methyltransferase 3 beta [Source:HGNC Symbol;Acc:HGNC:2979]
220520_s_at	NUP62CL	34 x 1	X q22	nucleoporin 62 C-terminal like [Source:HGNC Symbol;Acc:HGNC:25960]
220214_at	ZNF215	36 x 1	11 p15	zinc finger protein 215 [Source:HGNC Symbol;Acc:HGNC:13007]
219377_at	GAREM1	36 x 1	18 q12	GRB2 associated regulator of MAPK1 subtype 1 [Source:HGNC Symbol;Acc:HGNC:26136]
212104_s_at	RBFOX2	35 x 1	22 q12	RNA binding protein, fox-1 homolog 2 [Source:HGNC Symbol;Acc:HGNC:9906]
204717_s_at	SLC29A2	36 x 3	11 q13	solute carrier family 29 member 2 [Source:HGNC Symbol;Acc:HGNC:11004]
217520_x_at	LOC283683	37 x 1	15 q11
215143_at		36 x 1
202235_at	SLC16A1	34 x 1	1 p13	solute carrier family 16 member 1 [Source:HGNC Symbol;Acc:HGNC:10922]
219637_at	ARMC9	32 x 3	2 q37	armadillo repeat containing 9 [Source:HGNC Symbol;Acc:HGNC:20730]
219036_at	CEP70	35 x 1	3 q22	centrosomal protein 70 [Source:HGNC Symbol;Acc:HGNC:29972]
205902_at	KCNN3	34 x 2	1 q21	potassium calcium-activated channel subfamily N member 3 [Source:HGNC Symbol;Acc:HGNC:6292]
209262_s_at	NR2F6	30 x 1	19 p13	nuclear receptor subfamily 2 group F member 6 [Source:HGNC Symbol;Acc:HGNC:7977]
204029_at	CELSR2	37 x 1	1 p13	cadherin EGF LAG seven-pass G-type receptor 2 [Source:HGNC Symbol;Acc:HGNC:3231]
214432_at	ATP1A3	31 x 1	19 q13	ATPase Na+/K+ transporting subunit alpha 3 [Source:HGNC Symbol;Acc:HGNC:801]
222382_x_at		35 x 3
207046_at	HIST2H4A	32 x 3	1 q21	histone cluster 2 H4 family member a [Source:HGNC Symbol;Acc:HGNC:4794]
220277_at	CXXC4	31 x 1	4 q24	CXXC finger protein 4 [Source:HGNC Symbol;Acc:HGNC:24593]
215260_s_at	TCF3	37 x 1	19 p13	transcription factor 3 [Source:HGNC Symbol;Acc:HGNC:11633]
215011_at	SNHG3	34 x 1	1 p35	small nucleolar RNA host gene 3 [Source:HGNC Symbol;Acc:HGNC:10118]
205155_s_at	SPTBN2	37 x 1	11 q13	spectrin beta, non-erythrocytic 2 [Source:HGNC Symbol;Acc:HGNC:11276]
216887_s_at	LDB3	31 x 2	10 q23	LIM domain binding 3 [Source:HGNC Symbol;Acc:HGNC:15710]
215170_s_at	CEP152	35 x 1	15 q21	centrosomal protein 152 [Source:HGNC Symbol;Acc:HGNC:29298]
221286_s_at	MZB1	35 x 1	5 q31	marginal zone B and B1 cell specific protein [Source:HGNC Symbol;Acc:HGNC:30125]
209856_x_at	ABI2	30 x 1	2 q33	abl interactor 2 [Source:HGNC Symbol;Acc:HGNC:24011]
221168_at	PRDM13	32 x 1	6 q16	PR/SET domain 13 [Source:HGNC Symbol;Acc:HGNC:13998]
217656_at		37 x 1
216685_s_at	MTAP	35 x 1	9 p21	methylthioadenosine phosphorylase [Source:HGNC Symbol;Acc:HGNC:7413]
219683_at	FZD3	36 x 3	8 p21	frizzled class receptor 3 [Source:HGNC Symbol;Acc:HGNC:4041]
213358_at	MTCL1	37 x 1	18 p11	microtubule crosslinking factor 1 [Source:HGNC Symbol;Acc:HGNC:29121]
206919_at	ELK4	36 x 1	1 q32	ELK4, ETS transcription factor [Source:HGNC Symbol;Acc:HGNC:3326]
213901_x_at	RBFOX2	36 x 1	22 q12	RNA binding protein, fox-1 homolog 2 [Source:HGNC Symbol;Acc:HGNC:9906]
204256_at	ELOVL6	35 x 1	4 q25	ELOVL fatty acid elongase 6 [Source:HGNC Symbol;Acc:HGNC:15829]
211071_s_at	MLLT11	35 x 1	1 q21	myeloid/lymphoid or mixed-lineage leukemia; translocated to, 11 [Source:HGNC Symbol;Acc:HGNC:16997]
213835_x_at	GTPBP3	36 x 1	19 p13	GTP binding protein 3 (mitochondrial) [Source:HGNC Symbol;Acc:HGNC:14880]
221621_at	SNHG20	34 x 1	17 q25	small nucleolar RNA host gene 20 [Source:HGNC Symbol;Acc:HGNC:33099]
210868_s_at	ELOVL6	36 x 1	4 q25	ELOVL fatty acid elongase 6 [Source:HGNC Symbol;Acc:HGNC:15829]
215195_at	PRKCA	35 x 1	17 q24	protein kinase C alpha [Source:HGNC Symbol;Acc:HGNC:9393]
219531_at	CEP72	35 x 1	5 p15	centrosomal protein 72 [Source:HGNC Symbol;Acc:HGNC:25547]
208318_s_at	XYLB	31 x 1	3 p22	xylulokinase [Source:HGNC Symbol;Acc:HGNC:12839]
208110_x_at	MED25	37 x 2	19 q13	mediator complex subunit 25 [Source:HGNC Symbol;Acc:HGNC:28845]
218081_at	C20orf27	31 x 1	20 p13	chromosome 20 open reading frame 27 [Source:HGNC Symbol;Acc:HGNC:15873]
219515_at	PRDM10	37 x 1	11 q24	PR/SET domain 10 [Source:HGNC Symbol;Acc:HGNC:13995]
206654_s_at	POLR3G	35 x 1	5 q14	RNA polymerase III subunit G [Source:HGNC Symbol;Acc:HGNC:30075]
210871_x_at	SSX2IP	37 x 1	1 p22	SSX family member 2 interacting protein [Source:HGNC Symbol;Acc:HGNC:16509]
202728_s_at	LTBP1	36 x 1	2 p22	latent transforming growth factor beta binding protein 1 [Source:HGNC Symbol;Acc:HGNC:6714]
219731_at		32 x 2
210151_s_at	DYRK3	34 x 1	1 q32	dual specificity tyrosine phosphorylation regulated kinase 3 [Source:HGNC Symbol;Acc:HGNC:3094]
209490_s_at	PPT2	32 x 1	6 p21	palmitoyl-protein thioesterase 2 [Source:HGNC Symbol;Acc:HGNC:9326]
214221_at	ALMS1	36 x 1	2 p13	ALMS1, centrosome and basal body associated protein [Source:HGNC Symbol;Acc:HGNC:428]
207346_at		33 x 3
203806_s_at	FANCA	36 x 1	16 q24	Fanconi anemia complementation group A [Source:HGNC Symbol;Acc:HGNC:3582]
214358_at	ACACA	34 x 1	17 q12	acetyl-CoA carboxylase alpha [Source:HGNC Symbol;Acc:HGNC:84]
214723_x_at		37 x 1	2 q11	ankyrin repeat domain 36C [Source:HGNC Symbol;Acc:HGNC:32946]
219755_at	CBX8	30 x 1	17 q25	chromobox 8 [Source:HGNC Symbol;Acc:HGNC:15962]
212520_s_at	SMARCA4	35 x 1	19 p13	SWI/SNF related, matrix associated, actin dependent regulator of chromatin, subfamily a, member 4 [Source:HGNC Symbol;Acc:HGNC:11100]
209413_at	B4GALT2	32 x 2	1 p34	beta-1,4-galactosyltransferase 2 [Source:HGNC Symbol;Acc:HGNC:925]
221572_s_at	SLC26A6	30 x 1	3 p21	solute carrier family 26 member 6 [Source:HGNC Symbol;Acc:HGNC:14472]
219182_at	TMEM231	30 x 1	16 q23	transmembrane protein 231 [Source:HGNC Symbol;Acc:HGNC:37234]
220182_at	SLC25A23	32 x 1	19 p13	solute carrier family 25 member 23 [Source:HGNC Symbol;Acc:HGNC:19375]
221705_s_at	SIKE1	36 x 1	1 p13	suppressor of IKBKE 1 [Source:HGNC Symbol;Acc:HGNC:26119]
216299_s_at	XRCC3	35 x 2	14 q32	X-ray repair cross complementing 3 [Source:HGNC Symbol;Acc:HGNC:12830]
210175_at	GCFC2	36 x 1	2 p12	GC-rich sequence DNA-binding factor 2 [Source:HGNC Symbol;Acc:HGNC:1317]
203019_x_at	SSX2IP	37 x 1	1 p22	SSX family member 2 interacting protein [Source:HGNC Symbol;Acc:HGNC:16509]
206706_at	NTF3	37 x 1	12 p13	neurotrophin 3 [Source:HGNC Symbol;Acc:HGNC:8023]
212559_at	PRKAR1B	31 x 1	7 p22	protein kinase cAMP-dependent type I regulatory subunit beta [Source:HGNC Symbol;Acc:HGNC:9390]
218911_at	YEATS4	35 x 2	12 q15	YEATS domain containing 4 [Source:HGNC Symbol;Acc:HGNC:24859]
218795_at	ACP6	37 x 1	1 q21	acid phosphatase 6, lysophosphatidic [Source:HGNC Symbol;Acc:HGNC:29609]
200924_s_at	SLC3A2	31 x 1	11 q12	solute carrier family 3 member 2 [Source:HGNC Symbol;Acc:HGNC:11026]
217684_at		32 x 1
219886_at	CEP97	36 x 2	3 q12	centrosomal protein 97 [Source:HGNC Symbol;Acc:HGNC:26244]
222228_s_at	ALKBH4	30 x 1	7 q22	alkB homolog 4, lysine demethylase [Source:HGNC Symbol;Acc:HGNC:21900]
207219_at	ZFP69B	31 x 1	1 p34	ZFP69 zinc finger protein B [Source:HGNC Symbol;Acc:HGNC:28053]
201928_at		34 x 1	2 q34	plakophilin 4 pseudogene 1 [Source:HGNC Symbol;Acc:HGNC:42661]
200688_at	SF3B3	31 x 1	16 q22	splicing factor 3b subunit 3 [Source:HGNC Symbol;Acc:HGNC:10770]
64900_at	TMEM231	30 x 1	16 q23	transmembrane protein 231 [Source:HGNC Symbol;Acc:HGNC:37234]
203260_at	HDDC2	31 x 2	6 q22	HD domain containing 2 [Source:HGNC Symbol;Acc:HGNC:21078]
209054_s_at	NSD2	35 x 1	4 p16	nuclear receptor binding SET domain protein 2 [Source:HGNC Symbol;Acc:HGNC:12766]
221823_at	C5orf30	34 x 2	5 q21	chromosome 5 open reading frame 30 [Source:HGNC Symbol;Acc:HGNC:25052]
222305_at		36 x 1	2 p12
214097_at	RPS21	36 x 1	20 q13	ribosomal protein S21 [Source:HGNC Symbol;Acc:HGNC:10409]
212966_at	HIC2	36 x 3	22 q11	HIC ZBTB transcriptional repressor 2 [Source:HGNC Symbol;Acc:HGNC:18595]
216822_x_at		34 x 1	13 q12	cytochrome c, somatic pseudogene 33 [Source:HGNC Symbol;Acc:HGNC:24407]
205706_s_at	ANKRD26	34 x 1	10 p12	ankyrin repeat domain 26 [Source:HGNC Symbol;Acc:HGNC:29186]
221005_s_at	PTDSS2	31 x 1	11 p15	phosphatidylserine synthase 2 [Source:HGNC Symbol;Acc:HGNC:15463]
208460_at	GJC1	37 x 1	17 q21	gap junction protein gamma 1 [Source:HGNC Symbol;Acc:HGNC:4280]
213907_at		34 x 1
208386_x_at	DMC1	35 x 2	22 q13	DNA meiotic recombinase 1 [Source:HGNC Symbol;Acc:HGNC:2927]
205264_at	CD3EAP	34 x 1	19 q13	CD3e molecule associated protein [Source:HGNC Symbol;Acc:HGNC:24219]
214332_s_at	TSFM	35 x 2	12 q14	Ts translation elongation factor, mitochondrial [Source:HGNC Symbol;Acc:HGNC:12367]
214231_s_at	VWA8	37 x 1	13 q14	von Willebrand factor A domain containing 8 [Source:HGNC Symbol;Acc:HGNC:29071]
209258_s_at	SMC3	36 x 1	10 q25	structural maintenance of chromosomes 3 [Source:HGNC Symbol;Acc:HGNC:2468]
204391_x_at	TRIM24	34 x 2	7 q33	tripartite motif containing 24 [Source:HGNC Symbol;Acc:HGNC:11812]
219904_at	ZSCAN5A	33 x 3	19 q13	zinc finger and SCAN domain containing 5A [Source:HGNC Symbol;Acc:HGNC:23710]
217346_at		32 x 1	20 q13	peptidylprolyl isomerase A pseudogene 21 [Source:HGNC Symbol;Acc:HGNC:16246]
221270_s_at	QTRT1	30 x 1	19 p13	queuine tRNA-ribosyltransferase catalytic subunit 1 [Source:HGNC Symbol;Acc:HGNC:23797]
204814_at		37 x 1
216349_at		34 x 3	13 q14	fumarate hydratase pseudogene 1 [Source:HGNC Symbol;Acc:HGNC:39442]
208382_s_at	DMC1	35 x 3	22 q13	DNA meiotic recombinase 1 [Source:HGNC Symbol;Acc:HGNC:2927]
206273_at	PRELID3A	33 x 1	18 p11	PRELI domain containing 3A [Source:HGNC Symbol;Acc:HGNC:24639]
218868_at	ACTR3B	31 x 1	7 q36	ARP3 actin related protein 3 homolog B [Source:HGNC Symbol;Acc:HGNC:17256]
219116_s_at	DCUN1D2	37 x 2	13 q34	defective in cullin neddylation 1 domain containing 2 [Source:HGNC Symbol;Acc:HGNC:20328]
209900_s_at	SLC16A1	34 x 1	1 p13	solute carrier family 16 member 1 [Source:HGNC Symbol;Acc:HGNC:10922]
216226_at	TAF4B	37 x 1	18 q11	TATA-box binding protein associated factor 4b [Source:HGNC Symbol;Acc:HGNC:11538]
219419_at	RBFA	34 x 1	18 q23	ribosome binding factor A (putative) [Source:HGNC Symbol;Acc:HGNC:26120]
219507_at	RSRC1	35 x 1	3 q25	arginine and serine rich coiled-coil 1 [Source:HGNC Symbol;Acc:HGNC:24152]
203016_s_at	SSX2IP	36 x 1	1 p22	SSX family member 2 interacting protein [Source:HGNC Symbol;Acc:HGNC:16509]
215450_at		34 x 3
203018_s_at	SSX2IP	36 x 1	1 p22	SSX family member 2 interacting protein [Source:HGNC Symbol;Acc:HGNC:16509]
215031_x_at	RNF126	30 x 1	19 p13	ring finger protein 126 [Source:HGNC Symbol;Acc:HGNC:21151]
201122_x_at	EIF5A	33 x 1	17 p13	eukaryotic translation initiation factor 5A [Source:HGNC Symbol;Acc:HGNC:3300]
220020_at	XPNPEP3	33 x 3	22 q13	X-prolyl aminopeptidase 3 [Source:HGNC Symbol;Acc:HGNC:28052]
213685_at	ELOA-AS1	32 x 1	1 p36	ELOA antisense RNA 1 [Source:HGNC Symbol;Acc:HGNC:50582]
218887_at	MRPL2	31 x 1	6 p21	mitochondrial ribosomal protein L2 [Source:HGNC Symbol;Acc:HGNC:14056]
208433_s_at	LRP8	34 x 1	1 p32	LDL receptor related protein 8 [Source:HGNC Symbol;Acc:HGNC:6700]
214017_s_at	DHX34	32 x 1	19 q13	DExH-box helicase 34 [Source:HGNC Symbol;Acc:HGNC:16719]
211707_s_at	IQCB1	37 x 2	3 q13	IQ motif containing B1 [Source:HGNC Symbol;Acc:HGNC:28949]
215926_x_at	SNAPC4	33 x 1	9 q34	small nuclear RNA activating complex polypeptide 4 [Source:HGNC Symbol;Acc:HGNC:11137]
213753_x_at	EIF5A	33 x 1	17 p13	eukaryotic translation initiation factor 5A [Source:HGNC Symbol;Acc:HGNC:3300]
205667_at	WRN	34 x 3	8 p12	Werner syndrome RecQ like helicase [Source:HGNC Symbol;Acc:HGNC:12791]
218969_at	CORO7-PAM16	33 x 1	16 p13	CORO7-PAM16 readthrough [Source:HGNC Symbol;Acc:HGNC:44424]
213581_at	PDCD2	36 x 1	6 q27	programmed cell death 2 [Source:HGNC Symbol;Acc:HGNC:8762]
220085_at	HELLS	35 x 1	10 q23	helicase, lymphoid-specific [Source:HGNC Symbol;Acc:HGNC:4861]
213235_at	KNOP1	33 x 2	16 p12	lysine rich nucleolar protein 1 [Source:HGNC Symbol;Acc:HGNC:34404]
209678_s_at	PRKCI	33 x 2	3 q26	protein kinase C iota [Source:HGNC Symbol;Acc:HGNC:9404]
204824_at	ENDOG	32 x 1	9 q34	endonuclease G [Source:HGNC Symbol;Acc:HGNC:3346]
204514_at	DPH2	33 x 1	1 p34	DPH2 homolog [Source:HGNC Symbol;Acc:HGNC:3004]
218624_s_at		31 x 1	19 q13
205762_s_at	DUS4L	35 x 1	7 q22	dihydrouridine synthase 4 like [Source:HGNC Symbol;Acc:HGNC:21517]
213648_at	EXOSC7	32 x 2	3 p21	exosome component 7 [Source:HGNC Symbol;Acc:HGNC:28112]
219131_at	UBIAD1	31 x 1	1 p36	UbiA prenyltransferase domain containing 1 [Source:HGNC Symbol;Acc:HGNC:30791]
214283_at	TMEM97	34 x 1	17 q11	transmembrane protein 97 [Source:HGNC Symbol;Acc:HGNC:28106]
217025_s_at	DBN1	34 x 1	5 q35	drebrin 1 [Source:HGNC Symbol;Acc:HGNC:2695]
205705_at	ANKRD26	36 x 3	10 p12	ankyrin repeat domain 26 [Source:HGNC Symbol;Acc:HGNC:29186]
213951_s_at	PSMC3IP	34 x 1	17 q21	PSMC3 interacting protein [Source:HGNC Symbol;Acc:HGNC:17928]
206092_x_at		30 x 1	20 q13	RTEL1-TNFRSF6B readthrough (NMD candidate) [Source:HGNC Symbol;Acc:HGNC:44095]
219105_x_at	ORC6	35 x 1	16 q11	origin recognition complex subunit 6 [Source:HGNC Symbol;Acc:HGNC:17151]
203092_at	TIMM44	34 x 1	19 p13	translocase of inner mitochondrial membrane 44 [Source:HGNC Symbol;Acc:HGNC:17316]
210820_x_at	COQ7	31 x 1	16 p12	coenzyme Q7, hydroxylase [Source:HGNC Symbol;Acc:HGNC:2244]
221964_at	TULP3	30 x 1	12 p13	tubby like protein 3 [Source:HGNC Symbol;Acc:HGNC:12425]
216880_at	RAD51B	31 x 2	14 q24	RAD51 paralog B [Source:HGNC Symbol;Acc:HGNC:9822]
44040_at	FBXO41	36 x 3	2 p13	F-box protein 41 [Source:HGNC Symbol;Acc:HGNC:29409]
205134_s_at		34 x 1	6 q12	NUFIP1P, FMR1 interacting protein 1 pseudogene [Source:HGNC Symbol;Acc:HGNC:8058]
212109_at	HN1L	36 x 1	16 p13	hematological and neurological expressed 1 like [Source:HGNC Symbol;Acc:HGNC:14137]
209595_at	GTF2F2	35 x 2	13 q14	general transcription factor IIF subunit 2 [Source:HGNC Symbol;Acc:HGNC:4653]
202384_s_at	TCOF1	35 x 3	5 q32	treacle ribosome biogenesis factor 1 [Source:HGNC Symbol;Acc:HGNC:11654]
221480_at	HNRNPD	36 x 1	4 q21	heterogeneous nuclear ribonucleoprotein D [Source:HGNC Symbol;Acc:HGNC:5036]
209153_s_at	TCF3	37 x 1	19 p13	transcription factor 3 [Source:HGNC Symbol;Acc:HGNC:11633]
209152_s_at	TCF3	36 x 1	19 p13	transcription factor 3 [Source:HGNC Symbol;Acc:HGNC:11633]
213616_at	TPGS2	31 x 1	18 q12	tubulin polyglutamylase complex subunit 2 [Source:HGNC Symbol;Acc:HGNC:24561]
218745_x_at	TMEM161A	33 x 3	19 p13	transmembrane protein 161A [Source:HGNC Symbol;Acc:HGNC:26020]
208149_x_at		36 x 2	12 p13
206554_x_at	SETMAR	36 x 1	3 p26	SET domain and mariner transposase fusion gene [Source:HGNC Symbol;Acc:HGNC:10762]
206316_s_at	KNTC1	35 x 1	12 q24	kinetochore associated 1 [Source:HGNC Symbol;Acc:HGNC:17255]
219611_s_at	CEP85	36 x 2	1 p36	centrosomal protein 85 [Source:HGNC Symbol;Acc:HGNC:25309]
212964_at	HIC2	37 x 1	22 q11	HIC ZBTB transcriptional repressor 2 [Source:HGNC Symbol;Acc:HGNC:18595]
212801_at	CIT	34 x 2	12 q24	citron rho-interacting serine/threonine kinase [Source:HGNC Symbol;Acc:HGNC:1985]
219510_at	POLQ	35 x 1	3 q13	DNA polymerase theta [Source:HGNC Symbol;Acc:HGNC:9186]
213301_x_at	TRIM24	33 x 1	7 q33	tripartite motif containing 24 [Source:HGNC Symbol;Acc:HGNC:11812]
52005_at	WIZ	32 x 1	19 p13	widely interspaced zinc finger motifs [Source:HGNC Symbol;Acc:HGNC:30917]
219420_s_at	COA7	34 x 3	1 p32	cytochrome c oxidase assembly factor 7 (putative) [Source:HGNC Symbol;Acc:HGNC:25716]
201870_at	TOMM34	31 x 1	20 q13	translocase of outer mitochondrial membrane 34 [Source:HGNC Symbol;Acc:HGNC:15746]
205854_at	TULP3	31 x 2	12 p13	tubby like protein 3 [Source:HGNC Symbol;Acc:HGNC:12425]
217357_at		31 x 2	12 q21
208793_x_at	SMARCA4	36 x 1	19 p13	SWI/SNF related, matrix associated, actin dependent regulator of chromatin, subfamily a, member 4 [Source:HGNC Symbol;Acc:HGNC:11100]
202927_at	PIN1	30 x 1	19 p13	peptidylprolyl cis/trans isomerase, NIMA-interacting 1 [Source:HGNC Symbol;Acc:HGNC:8988]
201415_at	GSS	31 x 2	20 q11	glutathione synthetase [Source:HGNC Symbol;Acc:HGNC:4624]
214728_x_at	SMARCA4	36 x 1	19 p13	SWI/SNF related, matrix associated, actin dependent regulator of chromatin, subfamily a, member 4 [Source:HGNC Symbol;Acc:HGNC:11100]
209527_at	EXOSC2	35 x 1	9 q34	exosome component 2 [Source:HGNC Symbol;Acc:HGNC:17097]
210811_s_at	DDX49	34 x 1	19 p13	DEAD-box helicase 49 [Source:HGNC Symbol;Acc:HGNC:18684]
216675_at		30 x 1
213829_x_at		31 x 1	20 q13	RTEL1-TNFRSF6B readthrough (NMD candidate) [Source:HGNC Symbol;Acc:HGNC:44095]
203119_at	CCDC86	34 x 3	11 q12	coiled-coil domain containing 86 [Source:HGNC Symbol;Acc:HGNC:28359]
208159_x_at	DDX11	36 x 2	12 p11	DEAD/H-box helicase 11 [Source:HGNC Symbol;Acc:HGNC:2736]
205023_at	RAD51	31 x 1	15 q15	RAD51 recombinase [Source:HGNC Symbol;Acc:HGNC:9817]
217426_at		31 x 1
210053_at	TAF5	35 x 2	10 q24	TATA-box binding protein associated factor 5 [Source:HGNC Symbol;Acc:HGNC:11539]
213730_x_at	TCF3	36 x 3	19 p13	transcription factor 3 [Source:HGNC Symbol;Acc:HGNC:11633]
213811_x_at	TCF3	36 x 1	19 p13	transcription factor 3 [Source:HGNC Symbol;Acc:HGNC:11633]
216008_s_at	ARIH2	30 x 1	3 p21	ariadne RBR E3 ubiquitin protein ligase 2 [Source:HGNC Symbol;Acc:HGNC:690]
201396_s_at	SGTA	35 x 3	19 p13	small glutamine rich tetratricopeptide repeat containing alpha [Source:HGNC Symbol;Acc:HGNC:10819]
204594_s_at	MIEF1	34 x 2	22 q13	mitochondrial elongation factor 1 [Source:HGNC Symbol;Acc:HGNC:25979]
212139_at	GCN1	34 x 1	12 q24	GCN1, eIF2 alpha kinase activator homolog [Source:HGNC Symbol;Acc:HGNC:4199]
203064_s_at	FOXK2	33 x 2	17 q25	forkhead box K2 [Source:HGNC Symbol;Acc:HGNC:6036]
218586_at	MRGBP	33 x 1	20 q13	MRG domain binding protein [Source:HGNC Symbol;Acc:HGNC:15866]
44563_at	WRAP53	34 x 1	17 p13	WD repeat containing antisense to TP53 [Source:HGNC Symbol;Acc:HGNC:25522]
213133_s_at	GCSH	34 x 1	16 q23	glycine cleavage system protein H [Source:HGNC Symbol;Acc:HGNC:4208]
203830_at	C17orf75	36 x 1	17 q11	chromosome 17 open reading frame 75 [Source:HGNC Symbol;Acc:HGNC:30173]
221758_at	ARMC6	35 x 1	19 p13	armadillo repeat containing 6 [Source:HGNC Symbol;Acc:HGNC:25049]
43977_at	TMEM161A	33 x 3	19 p13	transmembrane protein 161A [Source:HGNC Symbol;Acc:HGNC:26020]
201675_at	AKAP1	33 x 1	17 q22	A-kinase anchoring protein 1 [Source:HGNC Symbol;Acc:HGNC:367]
212456_at	CLUH	31 x 2	17 p13	clustered mitochondria homolog [Source:HGNC Symbol;Acc:HGNC:29094]
208794_s_at	SMARCA4	36 x 1	19 p13	SWI/SNF related, matrix associated, actin dependent regulator of chromatin, subfamily a, member 4 [Source:HGNC Symbol;Acc:HGNC:11100]
216977_x_at	SNRPA1	35 x 1	15 q26	small nuclear ribonucleoprotein polypeptide A' [Source:HGNC Symbol;Acc:HGNC:11152]
214664_at	PAICS	36 x 1	4 q12	phosphoribosylaminoimidazole carboxylase and phosphoribosylaminoimidazolesuccinocarboxamide synthase [Source:HGNC Symbol;Acc:HGNC:8587]
213720_s_at	SMARCA4	36 x 1	19 p13	SWI/SNF related, matrix associated, actin dependent regulator of chromatin, subfamily a, member 4 [Source:HGNC Symbol;Acc:HGNC:11100]
212351_at	EIF2B5	30 x 1	3 q27	eukaryotic translation initiation factor 2B subunit epsilon [Source:HGNC Symbol;Acc:HGNC:3261]
219111_s_at	DDX54	32 x 1	12 q24	DEAD-box helicase 54 [Source:HGNC Symbol;Acc:HGNC:20084]
204610_s_at	CCDC85B	30 x 1	11 q13	coiled-coil domain containing 85B [Source:HGNC Symbol;Acc:HGNC:24926]
209820_s_at		30 x 1	16 p13	transducin beta like 3 [Source:HGNC Symbol;Acc:HGNC:11587]
212885_at	MPHOSPH10	32 x 3	2 p13	M-phase phosphoprotein 10 [Source:HGNC Symbol;Acc:HGNC:7213]
204599_s_at	MRPL28	33 x 2	16 p13	mitochondrial ribosomal protein L28 [Source:HGNC Symbol;Acc:HGNC:14484]
200895_s_at	FKBP4	34 x 2	12 p13	FK506 binding protein 4 [Source:HGNC Symbol;Acc:HGNC:3720]
204578_at	PPIP5K1	30 x 1	15 q15	diphosphoinositol pentakisphosphate kinase 1 [Source:HGNC Symbol;Acc:HGNC:29023]
218712_at	C1orf109	35 x 3	1 p34	chromosome 1 open reading frame 109 [Source:HGNC Symbol;Acc:HGNC:26039]
201674_s_at	AKAP1	33 x 1	17 q22	A-kinase anchoring protein 1 [Source:HGNC Symbol;Acc:HGNC:367]
211713_x_at	PCLAF	35 x 1	15 q22	PCNA clamp associated factor [Source:HGNC Symbol;Acc:HGNC:28961]
213760_s_at	ZNF330	34 x 3	4 q31	zinc finger protein 330 [Source:HGNC Symbol;Acc:HGNC:15462]
205995_x_at	IQCB1	36 x 3	3 q13	IQ motif containing B1 [Source:HGNC Symbol;Acc:HGNC:28949]
210776_x_at	TCF3	36 x 3	19 p13	transcription factor 3 [Source:HGNC Symbol;Acc:HGNC:11633]
203422_at	POLD1	33 x 1	19 q13	DNA polymerase delta 1, catalytic subunit [Source:HGNC Symbol;Acc:HGNC:9175]
212512_s_at	CARM1	30 x 1	19 p13	coactivator associated arginine methyltransferase 1 [Source:HGNC Symbol;Acc:HGNC:23393]
215722_s_at	SNRPA1	35 x 2	15 q26	small nuclear ribonucleoprotein polypeptide A' [Source:HGNC Symbol;Acc:HGNC:11152]
213378_s_at		36 x 3	12 p13
201948_at	GNL2	34 x 3	1 p34	G protein nucleolar 2 [Source:HGNC Symbol;Acc:HGNC:29925]
213130_at	ZNF473	34 x 3	19 q13	zinc finger protein 473 [Source:HGNC Symbol;Acc:HGNC:23239]
212126_at	CBX5	30 x 1	12 q13	chromobox 5 [Source:HGNC Symbol;Acc:HGNC:1555]
202799_at	CLPP	30 x 1	19 p13	caseinolytic mitochondrial matrix peptidase proteolytic subunit [Source:HGNC Symbol;Acc:HGNC:2084]
203046_s_at	TIMELESS	35 x 1	12 q13	timeless circadian clock [Source:HGNC Symbol;Acc:HGNC:11813]
218315_s_at	CDK5RAP1	33 x 1	20 q11	CDK5 regulatory subunit associated protein 1 [Source:HGNC Symbol;Acc:HGNC:15880]
202839_s_at	NDUFB7	31 x 1	19 p13	NADH:ubiquinone oxidoreductase subunit B7 [Source:HGNC Symbol;Acc:HGNC:7702]
212983_at	HRAS	31 x 1	11 p15	HRas proto-oncogene, GTPase [Source:HGNC Symbol;Acc:HGNC:5173]
219275_at		34 x 3
212348_s_at	KDM1A	32 x 1	1 p36	lysine demethylase 1A [Source:HGNC Symbol;Acc:HGNC:29079]
203091_at	FUBP1	30 x 1	1 p31	far upstream element binding protein 1 [Source:HGNC Symbol;Acc:HGNC:4004]
218104_at	TEX10	34 x 3	9 q31	testis expressed 10 [Source:HGNC Symbol;Acc:HGNC:25988]
218708_at	NXT1	30 x 1	20 p11	nuclear transport factor 2 like export factor 1 [Source:HGNC Symbol;Acc:HGNC:15913]
202474_s_at	HCFC1	32 x 1	X q28	host cell factor C1 [Source:HGNC Symbol;Acc:HGNC:4839]
202279_at	C14orf2	30 x 1	14 q32	chromosome 14 open reading frame 2 [Source:HGNC Symbol;Acc:HGNC:1188]
218227_at		31 x 1
211318_s_at	RAE1	31 x 1	20 q13	ribonucleic acid export 1 [Source:HGNC Symbol;Acc:HGNC:9828]
212691_at	NUP188	30 x 1	9 q34	nucleoporin 188 [Source:HGNC Symbol;Acc:HGNC:17859]
201377_at	UBAP2L	33 x 2	1 q21	ubiquitin associated protein 2 like [Source:HGNC Symbol;Acc:HGNC:29877]
217850_at	GNL3	34 x 3	3 p21	G protein nucleolar 3 [Source:HGNC Symbol;Acc:HGNC:29931]
210966_x_at	LARP1	30 x 1	5 q33	La ribonucleoprotein domain family member 1 [Source:HGNC Symbol;Acc:HGNC:29531]
215947_s_at	FAM136A	33 x 2	2 p13	family with sequence similarity 136 member A [Source:HGNC Symbol;Acc:HGNC:25911]
218592_s_at	CECR5	32 x 1	22 q11	haloacid dehalogenase like hydrolase domain containing 5 [Source:HGNC Symbol;Acc:HGNC:1843]
204355_at	DHX30	30 x 1	3 p21	DExH-box helicase 30 [Source:HGNC Symbol;Acc:HGNC:16716]
205176_s_at	ITGB3BP	35 x 3	1 p31	integrin subunit beta 3 binding protein [Source:HGNC Symbol;Acc:HGNC:6157]
203956_at	MORC2	33 x 2	22 q12	MORC family CW-type zinc finger 2 [Source:HGNC Symbol;Acc:HGNC:23573]
202785_at		30 x 1	19 p13
209932_s_at	DUT	32 x 3	15 q21	deoxyuridine triphosphatase [Source:HGNC Symbol;Acc:HGNC:3078]
218460_at	DNAAF5	32 x 3	7 p22	dynein axonemal assembly factor 5 [Source:HGNC Symbol;Acc:HGNC:26013]
210574_s_at	NUDC	31 x 2	1 p36	nuclear distribution C, dynein complex regulator [Source:HGNC Symbol;Acc:HGNC:8045]

## Sheet: Module C
ID	Symbol	Metagene	Chromosome	Description
210445_at	FABP6	17 x 1	5 q33	fatty acid binding protein 6 [Source:HGNC Symbol;Acc:HGNC:3561]
206023_at	NMU	15 x 1	4 q12	neuromedin U [Source:HGNC Symbol;Acc:HGNC:7859]
204483_at	ENO3	20 x 1	17 p13	enolase 3 [Source:HGNC Symbol;Acc:HGNC:3354]
217551_at		16 x 1	11 p15	olfactory receptor family 7 subfamily E member 14 pseudogene [Source:HGNC Symbol;Acc:HGNC:8385]
205700_at	HSD17B6	17 x 1	12 q13	hydroxysteroid 17-beta dehydrogenase 6 [Source:HGNC Symbol;Acc:HGNC:23316]
219188_s_at	MACROD1	19 x 1	11 q13	MACRO domain containing 1 [Source:HGNC Symbol;Acc:HGNC:29598]
206085_s_at	CTH	18 x 1	1 p31	cystathionine gamma-lyase [Source:HGNC Symbol;Acc:HGNC:2501]
206233_at	B4GALT6	15 x 1	18 q12	beta-1,4-galactosyltransferase 6 [Source:HGNC Symbol;Acc:HGNC:929]
221690_s_at	NLRP2	18 x 1	19 q13	NLR family pyrin domain containing 2 [Source:HGNC Symbol;Acc:HGNC:22948]
217127_at	CTH	17 x 1	1 p31	cystathionine gamma-lyase [Source:HGNC Symbol;Acc:HGNC:2501]
41037_at	TEAD4	14 x 1	12 p13	TEA domain transcription factor 4 [Source:HGNC Symbol;Acc:HGNC:11717]
203946_s_at	ARG2	17 x 1	14 q24	arginase 2 [Source:HGNC Symbol;Acc:HGNC:664]
204081_at	NRGN	14 x 1	11 q24	neurogranin [Source:HGNC Symbol;Acc:HGNC:8000]
219705_at	QSER1	18 x 3	11 p13	glutamine and serine rich 1 [Source:HGNC Symbol;Acc:HGNC:26154]
204404_at	SLC12A2	17 x 2	5 q23	solute carrier family 12 member 2 [Source:HGNC Symbol;Acc:HGNC:10911]
214157_at	GNAS	17 x 1	20 q13	GNAS complex locus [Source:HGNC Symbol;Acc:HGNC:4392]
206047_at	GNB3	18 x 1	12 p13	G protein subunit beta 3 [Source:HGNC Symbol;Acc:HGNC:4400]
204348_s_at		14 x 1	17 q11	adenylate kinase 4 pseudogene 1 [Source:HGNC Symbol;Acc:HGNC:364]
214614_at	MNX1	16 x 1	7 q36	motor neuron and pancreas homeobox 1 [Source:HGNC Symbol;Acc:HGNC:4979]
204393_s_at	ACPP	16 x 1	3 q22	acid phosphatase, prostate [Source:HGNC Symbol;Acc:HGNC:125]
213793_s_at	HOMER1	17 x 1	5 q14	homer scaffolding protein 1 [Source:HGNC Symbol;Acc:HGNC:17512]
216860_s_at	GDF11	19 x 1	12 q13	growth differentiation factor 11 [Source:HGNC Symbol;Acc:HGNC:4216]
221425_s_at		19 x 1	2 q14	iron-sulfur cluster assembly 1 pseudogene 6 [Source:HGNC Symbol;Acc:HGNC:38027]
207022_s_at	LDHC	15 x 1	11 p15	lactate dehydrogenase C [Source:HGNC Symbol;Acc:HGNC:6544]
206587_at	CCT6B	20 x 2	17 q12	chaperonin containing TCP1 subunit 6B [Source:HGNC Symbol;Acc:HGNC:1621]
208496_x_at	HIST1H3G	19 x 1	6 p22	histone cluster 1 H3 family member g [Source:HGNC Symbol;Acc:HGNC:4772]
201161_s_at	YBX3	18 x 1	12 p13	Y-box binding protein 3 [Source:HGNC Symbol;Acc:HGNC:2428]
204976_s_at	AMMECR1	20 x 1	X q23	Alport syndrome, mental retardation, midface hypoplasia and elliptocytosis chromosomal region gene 1 [Source:HGNC Symbol;Acc:HGNC:467]
202684_s_at	RNMT	20 x 1	18 p11	RNA guanine-7 methyltransferase [Source:HGNC Symbol;Acc:HGNC:10075]
220160_s_at	KPTN	18 x 1	19 q13	kaptin, actin binding protein [Source:HGNC Symbol;Acc:HGNC:6404]
201026_at		19 x 1
209246_at	ABCF2	17 x 1	7 q36	ATP binding cassette subfamily F member 2 [Source:HGNC Symbol;Acc:HGNC:71]
216609_at		16 x 2
204286_s_at	PMAIP1	19 x 1	18 q21	phorbol-12-myristate-13-acetate-induced protein 1 [Source:HGNC Symbol;Acc:HGNC:9108]
216548_x_at		16 x 1	20 q11	high mobility group box 3 pseudogene 1 [Source:HGNC Symbol;Acc:HGNC:16240]
218275_at		17 x 1	17 q25
213262_at	SACS	19 x 1	13 q12	sacsin molecular chaperone [Source:HGNC Symbol;Acc:HGNC:10519]
202806_at	DBN1	16 x 1	5 q35	drebrin 1 [Source:HGNC Symbol;Acc:HGNC:2695]
211056_s_at	SRD5A1	19 x 1	5 p15	steroid 5 alpha-reductase 1 [Source:HGNC Symbol;Acc:HGNC:11284]
214788_x_at	DDN	17 x 1	12 q13	dendrin [Source:HGNC Symbol;Acc:HGNC:24458]
210008_s_at	MRPS12	17 x 2	19 q13	mitochondrial ribosomal protein S12 [Source:HGNC Symbol;Acc:HGNC:10380]
214804_at	CENPI	15 x 1	X q22	centromere protein I [Source:HGNC Symbol;Acc:HGNC:3968]
213124_at	ZNF473	20 x 1	19 q13	zinc finger protein 473 [Source:HGNC Symbol;Acc:HGNC:23239]
208580_x_at	HIST1H4K	15 x 1	6 p22	histone cluster 1 H4 family member k [Source:HGNC Symbol;Acc:HGNC:4784]
205658_s_at	SNAPC4	18 x 1	9 q34	small nuclear RNA activating complex polypeptide 4 [Source:HGNC Symbol;Acc:HGNC:11137]
220223_at	ATAD5	15 x 1	17 q11	ATPase family, AAA domain containing 5 [Source:HGNC Symbol;Acc:HGNC:25752]
219911_s_at	SLCO4A1	16 x 1	20 q13	solute carrier organic anion transporter family member 4A1 [Source:HGNC Symbol;Acc:HGNC:10953]
220602_s_at		18 x 1	15 q25	golgin A2 pseudogene 10 [Source:HGNC Symbol;Acc:HGNC:26229]
220885_s_at	CENPJ	18 x 3	13 q12	centromere protein J [Source:HGNC Symbol;Acc:HGNC:17272]
212996_s_at	URB1	18 x 1	21 q22	URB1 ribosome biogenesis 1 homolog (S. cerevisiae) [Source:HGNC Symbol;Acc:HGNC:17344]
202830_s_at	SLC37A4	16 x 1	11 q23	solute carrier family 37 member 4 [Source:HGNC Symbol;Acc:HGNC:4061]
213984_at	PDS5A	20 x 1	4 p14	PDS5 cohesin associated factor A [Source:HGNC Symbol;Acc:HGNC:29088]
212525_s_at	H2AFX	15 x 1	11 q23	H2A histone family member X [Source:HGNC Symbol;Acc:HGNC:4739]
214210_at	SLC25A17	18 x 3	22 q13	solute carrier family 25 member 17 [Source:HGNC Symbol;Acc:HGNC:10987]
221845_s_at	CLPB	16 x 1	11 q13	ClpB homolog, mitochondrial AAA ATPase chaperonin [Source:HGNC Symbol;Acc:HGNC:30664]
36475_at	GCAT	16 x 1	22 q13	glycine C-acetyltransferase [Source:HGNC Symbol;Acc:HGNC:4188]
204233_s_at	CHKA	16 x 1	11 q13	choline kinase alpha [Source:HGNC Symbol;Acc:HGNC:1937]
218647_s_at	YRDC	19 x 1	1 p34	yrdC N6-threonylcarbamoyltransferase domain containing [Source:HGNC Symbol;Acc:HGNC:28905]
209273_s_at		19 x 2	2 q14	iron-sulfur cluster assembly 1 pseudogene 6 [Source:HGNC Symbol;Acc:HGNC:38027]
221227_x_at	COQ3	16 x 1	6 q16	coenzyme Q3, methyltransferase [Source:HGNC Symbol;Acc:HGNC:18175]
212219_at	PSME4	20 x 1	2 p16	proteasome activator subunit 4 [Source:HGNC Symbol;Acc:HGNC:20635]
203775_at	SLC25A13	17 x 1	7 q21	solute carrier family 25 member 13 [Source:HGNC Symbol;Acc:HGNC:10983]
222360_at	DPH5	20 x 1	1 p21	diphthamide biosynthesis 5 [Source:HGNC Symbol;Acc:HGNC:24270]
206508_at	CD70	15 x 2	19 p13	CD70 molecule [Source:HGNC Symbol;Acc:HGNC:11937]
64432_at	MAPKAPK5-AS1	20 x 1	12 q24	MAPKAPK5 antisense RNA 1 [Source:HGNC Symbol;Acc:HGNC:24091]
214672_at	TTLL5	14 x 1	14 q24	tubulin tyrosine ligase like 5 [Source:HGNC Symbol;Acc:HGNC:19963]
218725_at	SLC25A22	18 x 1	11 p15	solute carrier family 25 member 22 [Source:HGNC Symbol;Acc:HGNC:19954]
219617_at	CAMKMT	18 x 1	2 p21	calmodulin-lysine N-methyltransferase [Source:HGNC Symbol;Acc:HGNC:26276]
209725_at	UTP20	17 x 1	12 q23	UTP20, small subunit processome component [Source:HGNC Symbol;Acc:HGNC:17897]
206533_at	CHRNA5	17 x 3	15 q25	cholinergic receptor nicotinic alpha 5 subunit [Source:HGNC Symbol;Acc:HGNC:1959]
218888_s_at	NETO2	17 x 3	16 q12	neuropilin and tolloid like 2 [Source:HGNC Symbol;Acc:HGNC:14644]
219231_at	TGS1	20 x 1	8 q12	trimethylguanosine synthase 1 [Source:HGNC Symbol;Acc:HGNC:17843]
203576_at	BCAT2	18 x 2	19 q13	branched chain amino acid transaminase 2 [Source:HGNC Symbol;Acc:HGNC:977]
206526_at	RIBC2	16 x 1	22 q13	RIB43A domain with coiled-coils 2 [Source:HGNC Symbol;Acc:HGNC:13241]
218479_s_at	XPO4	18 x 1	13 q12	exportin 4 [Source:HGNC Symbol;Acc:HGNC:17796]
206993_at	ATP5S	18 x 1	14 q21	ATP synthase, H+ transporting, mitochondrial Fo complex subunit s (factor B) [Source:HGNC Symbol;Acc:HGNC:18799]
221925_s_at	CSPP1	19 x 1	8 q13	centrosome and spindle pole associated protein 1 [Source:HGNC Symbol;Acc:HGNC:26193]
202314_at	CYP51A1	18 x 1	7 q21	cytochrome P450 family 51 subfamily A member 1 [Source:HGNC Symbol;Acc:HGNC:2649]
212596_s_at	HMGXB4	19 x 1	22 q12	HMG-box containing 4 [Source:HGNC Symbol;Acc:HGNC:5003]
209635_at	AP1S1	14 x 1	7 q22	adaptor related protein complex 1 sigma 1 subunit [Source:HGNC Symbol;Acc:HGNC:559]
212292_at	SLC7A1	18 x 3	13 q12	solute carrier family 7 member 1 [Source:HGNC Symbol;Acc:HGNC:11057]
200832_s_at	SCD	14 x 1	10 q24	stearoyl-CoA desaturase [Source:HGNC Symbol;Acc:HGNC:10571]
202934_at	HK2	16 x 1	2 p12	hexokinase 2 [Source:HGNC Symbol;Acc:HGNC:4923]
212882_at	KLHL18	19 x 1	3 p21	kelch like family member 18 [Source:HGNC Symbol;Acc:HGNC:29120]
218278_at		18 x 1
219215_s_at	SLC39A4	15 x 1	8 q24	solute carrier family 39 member 4 [Source:HGNC Symbol;Acc:HGNC:17129]
213427_at	RPP40	15 x 1	6 p25	ribonuclease P/MRP subunit p40 [Source:HGNC Symbol;Acc:HGNC:20992]
218737_at	SBNO1	18 x 1	12 q24	strawberry notch homolog 1 [Source:HGNC Symbol;Acc:HGNC:22973]
221540_x_at	GTF2H2	20 x 1	5 q13	general transcription factor IIH subunit 2 [Source:HGNC Symbol;Acc:HGNC:4656]
219448_at		20 x 1	8 q21	ribosomal protein S20 pseudogene 21 [Source:HGNC Symbol;Acc:HGNC:35993]
212396_s_at	EMC1	17 x 1	1 p36	ER membrane protein complex subunit 1 [Source:HGNC Symbol;Acc:HGNC:28957]
221817_at	DOLPP1	17 x 1	9 q34	dolichyldiphosphatase 1 [Source:HGNC Symbol;Acc:HGNC:29565]
203321_s_at	ADNP2	20 x 1	18 q23	ADNP homeobox 2 [Source:HGNC Symbol;Acc:HGNC:23803]
205281_s_at	PIGA	20 x 1	X p22	phosphatidylinositol glycan anchor biosynthesis class A [Source:HGNC Symbol;Acc:HGNC:8957]
214264_s_at	EFCAB11	14 x 1	14 q32	EF-hand calcium binding domain 11 [Source:HGNC Symbol;Acc:HGNC:20357]
218202_x_at	MRPL44	20 x 1	2 q36	mitochondrial ribosomal protein L44 [Source:HGNC Symbol;Acc:HGNC:16650]
200690_at	HSPA9	19 x 1	5 q31	heat shock protein family A (Hsp70) member 9 [Source:HGNC Symbol;Acc:HGNC:5244]
209065_at	UQCRB	20 x 1	8 q22	ubiquinol-cytochrome c reductase binding protein [Source:HGNC Symbol;Acc:HGNC:12582]
203095_at	MTIF2	19 x 1	2 p16	mitochondrial translational initiation factor 2 [Source:HGNC Symbol;Acc:HGNC:7441]
219362_at	NAA35	19 x 1	9 q21	N(alpha)-acetyltransferase 35, NatC auxiliary subunit [Source:HGNC Symbol;Acc:HGNC:24340]
213379_at	COQ2	16 x 3	4 q21	coenzyme Q2, polyprenyltransferase [Source:HGNC Symbol;Acc:HGNC:25223]
203712_at	PUM3	16 x 1	9 p24	pumilio RNA binding family member 3 [Source:HGNC Symbol;Acc:HGNC:29676]
210115_at	RPL39L	14 x 1	3 q27	ribosomal protein L39 like [Source:HGNC Symbol;Acc:HGNC:17094]
212133_at	NIPA2	20 x 1	15 q11	non imprinted in Prader-Willi/Angelman syndrome 2 [Source:HGNC Symbol;Acc:HGNC:17044]
216554_s_at		17 x 3
217166_at		19 x 1	6 p21	prothymosin, alpha pseudogene 1 [Source:HGNC Symbol;Acc:HGNC:9624]
218598_at	RINT1	20 x 1	7 q22	RAD50 interactor 1 [Source:HGNC Symbol;Acc:HGNC:21876]
217499_x_at		15 x 1	2 q24	olfactory receptor family 7 subfamily E member 28 pseudogene [Source:HGNC Symbol;Acc:HGNC:8400]
203201_at	PMM2	17 x 1	16 p13	phosphomannomutase 2 [Source:HGNC Symbol;Acc:HGNC:9115]
219023_at	AP1AR	20 x 1	4 q25	adaptor related protein complex 1 associated regulatory protein [Source:HGNC Symbol;Acc:HGNC:28808]
214193_s_at	DIEXF	15 x 1	1 q32	digestive organ expansion factor homolog (zebrafish) [Source:HGNC Symbol;Acc:HGNC:28440]
207590_s_at	CENPI	16 x 2	X q22	centromere protein I [Source:HGNC Symbol;Acc:HGNC:3968]
214170_x_at	FH	15 x 2	1 q43	fumarate hydratase [Source:HGNC Symbol;Acc:HGNC:3700]
202070_s_at	IDH3A	17 x 2	15 q25	isocitrate dehydrogenase 3 (NAD(+)) alpha [Source:HGNC Symbol;Acc:HGNC:5384]
209100_at	IFRD2	17 x 1	3 p21	interferon related developmental regulator 2 [Source:HGNC Symbol;Acc:HGNC:5457]
222140_s_at	GPR89A	20 x 1	1 q21	G protein-coupled receptor 89A [Source:HGNC Symbol;Acc:HGNC:31984]
218617_at	TRIT1	18 x 1	1 p34	tRNA isopentenyltransferase 1 [Source:HGNC Symbol;Acc:HGNC:20286]
201195_s_at	SLC7A5	16 x 1	16 q24	solute carrier family 7 member 5 [Source:HGNC Symbol;Acc:HGNC:11063]
218702_at	SARS2	19 x 1	19 q13	seryl-tRNA synthetase 2, mitochondrial [Source:HGNC Symbol;Acc:HGNC:17697]
207153_s_at	GLMN	17 x 1	1 p22	glomulin, FKBP associated protein [Source:HGNC Symbol;Acc:HGNC:14373]
201196_s_at		19 x 3	5 p12	adenosylmethionine decarboxylase 1 pseudogene 3 [Source:HGNC Symbol;Acc:HGNC:51608]
204500_s_at	AGTPBP1	20 x 1	9 q21	ATP/GTP binding protein 1 [Source:HGNC Symbol;Acc:HGNC:17258]
204831_at	CDK8	20 x 1	13 q12	cyclin dependent kinase 8 [Source:HGNC Symbol;Acc:HGNC:1779]
203545_at	ALG8	18 x 2	11 q14	ALG8, alpha-1,3-glucosyltransferase [Source:HGNC Symbol;Acc:HGNC:23161]
214442_s_at	PIAS2	17 x 2	18 q21	protein inhibitor of activated STAT 2 [Source:HGNC Symbol;Acc:HGNC:17311]
219289_at	HEATR3	19 x 1	16 q12	HEAT repeat containing 3 [Source:HGNC Symbol;Acc:HGNC:26087]
204330_s_at	MRPS12	19 x 1	19 q13	mitochondrial ribosomal protein S12 [Source:HGNC Symbol;Acc:HGNC:10380]
209666_s_at	CHUK	20 x 1	10 q24	conserved helix-loop-helix ubiquitous kinase [Source:HGNC Symbol;Acc:HGNC:1974]
203677_s_at	TARBP2	16 x 3	12 q13	TARBP2, RISC loading complex RNA binding subunit [Source:HGNC Symbol;Acc:HGNC:11569]
216422_at		16 x 1	20 p12	proliferation-associated 2G4 pseudogene 2 [Source:HGNC Symbol;Acc:HGNC:16531]
212894_at	SUPV3L1	19 x 1	10 q22	Suv3 like RNA helicase [Source:HGNC Symbol;Acc:HGNC:11471]
203344_s_at	RBBP8	16 x 1	18 q11	RB binding protein 8, endonuclease [Source:HGNC Symbol;Acc:HGNC:9891]
218886_at	PAK1IP1	16 x 1	6 p24	PAK1 interacting protein 1 [Source:HGNC Symbol;Acc:HGNC:20882]
218893_at	ISOC2	15 x 2	19 q13	isochorismatase domain containing 2 [Source:HGNC Symbol;Acc:HGNC:26278]
221503_s_at	KPNA3	19 x 1	13 q14	karyopherin subunit alpha 3 [Source:HGNC Symbol;Acc:HGNC:6396]
218981_at	SDHAF3	16 x 1	7 q21	succinate dehydrogenase complex assembly factor 3 [Source:HGNC Symbol;Acc:HGNC:21752]
203715_at	TBCE	17 x 3	1 q42	tubulin folding cofactor E [Source:HGNC Symbol;Acc:HGNC:11582]
218662_s_at	NCAPG	14 x 1	4 p15	non-SMC condensin I complex subunit G [Source:HGNC Symbol;Acc:HGNC:24304]
214435_x_at	RALA	15 x 1	7 p14	RAS like proto-oncogene A [Source:HGNC Symbol;Acc:HGNC:9839]
220258_s_at	WRAP53	17 x 1	17 p13	WD repeat containing antisense to TP53 [Source:HGNC Symbol;Acc:HGNC:25522]
218697_at	NCKIPSD	15 x 1	3 p21	NCK interacting protein with SH3 domain [Source:HGNC Symbol;Acc:HGNC:15486]
202115_s_at	NOC2L	17 x 1	1 p36	NOC2 like nucleolar associated transcriptional repressor [Source:HGNC Symbol;Acc:HGNC:24517]
204087_s_at	SLC5A6	19 x 1	2 p23	solute carrier family 5 member 6 [Source:HGNC Symbol;Acc:HGNC:11041]
219219_at	TMEM160	17 x 2	19 q13	transmembrane protein 160 [Source:HGNC Symbol;Acc:HGNC:26042]
204027_s_at	METTL1	15 x 1	12 q14	methyltransferase like 1 [Source:HGNC Symbol;Acc:HGNC:7030]
204699_s_at	DIEXF	20 x 1	1 q32	digestive organ expansion factor homolog (zebrafish) [Source:HGNC Symbol;Acc:HGNC:28440]
212247_at	NUP205	18 x 1	7 q33	nucleoporin 205 [Source:HGNC Symbol;Acc:HGNC:18658]
213346_at	TEX30	16 x 1	13 q33	testis expressed 30 [Source:HGNC Symbol;Acc:HGNC:25188]
218392_x_at	SFXN1	15 x 1	5 q35	sideroflexin 1 [Source:HGNC Symbol;Acc:HGNC:16085]
206550_s_at	NUP155	17 x 1	5 p13	nucleoporin 155 [Source:HGNC Symbol;Acc:HGNC:8063]
215438_x_at	GSPT1	16 x 2	16 p13	G1 to S phase transition 1 [Source:HGNC Symbol;Acc:HGNC:4621]
204080_at	TOE1	20 x 1	1 p34	target of EGR1, member 1 (nuclear) [Source:HGNC Symbol;Acc:HGNC:15954]
212825_at	PAXIP1	17 x 1	7 q36	PAX interacting protein 1 [Source:HGNC Symbol;Acc:HGNC:8624]
214426_x_at	CHAF1A	14 x 1	19 p13	chromatin assembly factor 1 subunit A [Source:HGNC Symbol;Acc:HGNC:1910]
218398_at	MRPS30	19 x 2	5 p12	mitochondrial ribosomal protein S30 [Source:HGNC Symbol;Acc:HGNC:8769]
218385_at	MRPS18A	15 x 2	6 p21	mitochondrial ribosomal protein S18A [Source:HGNC Symbol;Acc:HGNC:14515]
219002_at	FASTKD1	16 x 1	2 q31	FAST kinase domains 1 [Source:HGNC Symbol;Acc:HGNC:26150]
211686_s_at	MAK16	19 x 2	8 p12	MAK16 homolog [Source:HGNC Symbol;Acc:HGNC:13703]
221549_at	GRWD1	17 x 2	19 q13	glutamate rich WD repeat containing 1 [Source:HGNC Symbol;Acc:HGNC:21270]
204407_at	TTF2	16 x 1	1 p13	transcription termination factor 2 [Source:HGNC Symbol;Acc:HGNC:12398]
222163_s_at	SPATA5L1	19 x 1	15 q21	spermatogenesis associated 5 like 1 [Source:HGNC Symbol;Acc:HGNC:28762]
212160_at	XPOT	18 x 1	12 q14	exportin for tRNA [Source:HGNC Symbol;Acc:HGNC:12826]
210976_s_at	PFKM	14 x 1	12 q13	phosphofructokinase, muscle [Source:HGNC Symbol;Acc:HGNC:8877]
218016_s_at	POLR3E	19 x 1	16 p12	RNA polymerase III subunit E [Source:HGNC Symbol;Acc:HGNC:30347]
218933_at	SPATA5L1	19 x 1	15 q21	spermatogenesis associated 5 like 1 [Source:HGNC Symbol;Acc:HGNC:28762]
203693_s_at	E2F3	14 x 1	6 p22	E2F transcription factor 3 [Source:HGNC Symbol;Acc:HGNC:3115]
217754_at	DDX56	18 x 1	7 p13	DEAD-box helicase 56 [Source:HGNC Symbol;Acc:HGNC:18193]
202107_s_at	MCM2	14 x 1	3 q21	minichromosome maintenance complex component 2 [Source:HGNC Symbol;Acc:HGNC:6944]
203564_at	FANCG	15 x 1	9 p13	Fanconi anemia complementation group G [Source:HGNC Symbol;Acc:HGNC:3588]
204752_x_at	PARP2	15 x 1	14 q11	poly(ADP-ribose) polymerase 2 [Source:HGNC Symbol;Acc:HGNC:272]
205053_at	PRIM1	16 x 3	12 q13	primase (DNA) subunit 1 [Source:HGNC Symbol;Acc:HGNC:9369]
218670_at	PUS1	18 x 1	12 q24	pseudouridylate synthase 1 [Source:HGNC Symbol;Acc:HGNC:15508]
212434_at	GRPEL1	19 x 1	4 p16	GrpE like 1, mitochondrial [Source:HGNC Symbol;Acc:HGNC:19696]
208795_s_at	MCM7	15 x 1	7 q22	minichromosome maintenance complex component 7 [Source:HGNC Symbol;Acc:HGNC:6950]
203150_at	RABEPK	16 x 2	9 q33	Rab9 effector protein with kelch motifs [Source:HGNC Symbol;Acc:HGNC:16896]
208693_s_at	GARS	16 x 1	7 p14	glycyl-tRNA synthetase [Source:HGNC Symbol;Acc:HGNC:4162]
203339_at	SLC25A12	18 x 3	2 q31	solute carrier family 25 member 12 [Source:HGNC Symbol;Acc:HGNC:10982]
204461_x_at	RAD1	19 x 1	5 p13	RAD1 checkpoint DNA exonuclease [Source:HGNC Symbol;Acc:HGNC:9806]
218239_s_at	GTPBP4	19 x 1	10 p15	GTP binding protein 4 [Source:HGNC Symbol;Acc:HGNC:21535]
212871_at	MAPKAPK5	20 x 1	12 q24	mitogen-activated protein kinase-activated protein kinase 5 [Source:HGNC Symbol;Acc:HGNC:6889]
218680_x_at	SERF2	16 x 3	15 q15	small EDRK-rich factor 2 [Source:HGNC Symbol;Acc:HGNC:10757]
212680_x_at		14 x 1	4 q31	protein phosphatase 1 regulatory inhibitor subunit 14B pseudogene 3 [Source:HGNC Symbol;Acc:HGNC:16330]
219363_s_at	MTERF3	20 x 1	8 q22	mitochondrial transcription termination factor 3 [Source:HGNC Symbol;Acc:HGNC:24258]
203374_s_at	TPP2	17 x 2	13 q33	tripeptidyl peptidase 2 [Source:HGNC Symbol;Acc:HGNC:12016]
218399_s_at	CDCA4	14 x 1	14 q32	cell division cycle associated 4 [Source:HGNC Symbol;Acc:HGNC:14625]
201115_at	POLD2	16 x 1	7 p13	DNA polymerase delta 2, accessory subunit [Source:HGNC Symbol;Acc:HGNC:9176]
201873_s_at	ABCE1	18 x 1	4 q31	ATP binding cassette subfamily E member 1 [Source:HGNC Symbol;Acc:HGNC:69]
202396_at	TCERG1	20 x 1	5 q32	transcription elongation regulator 1 [Source:HGNC Symbol;Acc:HGNC:15630]
215773_x_at	PARP2	15 x 1	14 q11	poly(ADP-ribose) polymerase 2 [Source:HGNC Symbol;Acc:HGNC:272]
221652_s_at	ASUN	15 x 1	12 p11	integrator complex subunit 13 [Source:HGNC Symbol;Acc:HGNC:20174]
204809_at	CLPX	20 x 1	15 q22	caseinolytic mitochondrial matrix peptidase chaperone subunit [Source:HGNC Symbol;Acc:HGNC:2088]
212295_s_at	SLC7A1	16 x 1	13 q12	solute carrier family 7 member 1 [Source:HGNC Symbol;Acc:HGNC:11057]
221712_s_at	WDR74	19 x 1	11 q12	WD repeat domain 74 [Source:HGNC Symbol;Acc:HGNC:25529]
208114_s_at	ISG20L2	20 x 1	1 q23	interferon stimulated exonuclease gene 20 like 2 [Source:HGNC Symbol;Acc:HGNC:25745]
211615_s_at	LRPPRC	18 x 2	2 p21	leucine rich pentatricopeptide repeat containing [Source:HGNC Symbol;Acc:HGNC:15714]
201391_at	TRAP1	16 x 1	16 p13	TNF receptor associated protein 1 [Source:HGNC Symbol;Acc:HGNC:16264]
214431_at		16 x 1	4 p16	guanine monophosphate synthase pseudogene 1 [Source:HGNC Symbol;Acc:HGNC:39428]
204023_at	RFC4	15 x 1	3 q27	replication factor C subunit 4 [Source:HGNC Symbol;Acc:HGNC:9972]
219006_at	NDUFAF4	18 x 1	6 q16	NADH:ubiquinone oxidoreductase complex assembly factor 4 [Source:HGNC Symbol;Acc:HGNC:21034]
202690_s_at	SNRPD1	16 x 1	18 q11	small nuclear ribonucleoprotein D1 polypeptide [Source:HGNC Symbol;Acc:HGNC:11158]
201585_s_at	SFPQ	16 x 3	1 p34	splicing factor proline and glutamine rich [Source:HGNC Symbol;Acc:HGNC:10774]
209180_at	RABGGTB	20 x 1	1 p31	Rab geranylgeranyltransferase beta subunit [Source:HGNC Symbol;Acc:HGNC:9796]
218889_at	NOC3L	19 x 1	10 q23	NOC3 like DNA replication regulator [Source:HGNC Symbol;Acc:HGNC:24034]
211953_s_at	IPO5	16 x 1	13 q32	importin 5 [Source:HGNC Symbol;Acc:HGNC:6402]
212789_at	NCAPD3	16 x 1	11 q25	non-SMC condensin II complex subunit D3 [Source:HGNC Symbol;Acc:HGNC:28952]
209025_s_at	SYNCRIP	18 x 1	6 q14	synaptotagmin binding cytoplasmic RNA interacting protein [Source:HGNC Symbol;Acc:HGNC:16918]
202309_at	MTHFD1	15 x 1	14 q23	methylenetetrahydrofolate dehydrogenase, cyclohydrolase and formyltetrahydrofolate synthetase 1 [Source:HGNC Symbol;Acc:HGNC:7432]
219544_at	BORA	15 x 1	13 q21	bora, aurora kinase A activator [Source:HGNC Symbol;Acc:HGNC:24724]
215210_s_at	DLST	19 x 3	14 q24	dihydrolipoamide S-succinyltransferase [Source:HGNC Symbol;Acc:HGNC:2911]
219217_at	NARS2	17 x 2	11 q14	asparaginyl-tRNA synthetase 2, mitochondrial (putative) [Source:HGNC Symbol;Acc:HGNC:26274]
208972_s_at	ATP5G1	15 x 2	17 q21	ATP synthase, H+ transporting, mitochondrial Fo complex subunit C1 (subunit 9) [Source:HGNC Symbol;Acc:HGNC:841]
219060_at	WDYHV1	17 x 3	8 q24	WDYHV motif containing 1 [Source:HGNC Symbol;Acc:HGNC:25490]
209302_at	POLR2H	15 x 2	3 q27	RNA polymerase II subunit H [Source:HGNC Symbol;Acc:HGNC:9195]
219212_at	HSPA14	18 x 3	10 p13	heat shock protein family A (Hsp70) member 14 [Source:HGNC Symbol;Acc:HGNC:29526]
210386_s_at	MTX1	16 x 3	1 q22	metaxin 1 [Source:HGNC Symbol;Acc:HGNC:7504]
208676_s_at	PA2G4	14 x 1	12 q13	proliferation-associated 2G4 [Source:HGNC Symbol;Acc:HGNC:8550]
215136_s_at	EXOSC8	18 x 1	13 q13	exosome component 8 [Source:HGNC Symbol;Acc:HGNC:17035]
201459_at	RUVBL2	15 x 1	19 q13	RuvB like AAA ATPase 2 [Source:HGNC Symbol;Acc:HGNC:10475]
202200_s_at	SRPK1	14 x 1	6 p21	SRSF protein kinase 1 [Source:HGNC Symbol;Acc:HGNC:11305]
218512_at	WDR12	15 x 1	2 q33	WD repeat domain 12 [Source:HGNC Symbol;Acc:HGNC:14098]
211951_at	NOLC1	18 x 1	10 q24	nucleolar and coiled-body phosphoprotein 1 [Source:HGNC Symbol;Acc:HGNC:15608]
204905_s_at	EEF1E1	16 x 1	6 p24	eukaryotic translation elongation factor 1 epsilon 1 [Source:HGNC Symbol;Acc:HGNC:3212]
201173_x_at	NUDC	17 x 2	1 p36	nuclear distribution C, dynein complex regulator [Source:HGNC Symbol;Acc:HGNC:8045]
201892_s_at	IMPDH2	17 x 2	3 p21	inosine monophosphate dehydrogenase 2 [Source:HGNC Symbol;Acc:HGNC:6053]
217809_at	BZW2	15 x 1	7 p21	basic leucine zipper and W2 domains 2 [Source:HGNC Symbol;Acc:HGNC:18808]
203743_s_at	TDG	17 x 1	12 q23	thymine DNA glycosylase [Source:HGNC Symbol;Acc:HGNC:11700]
213088_s_at		14 x 1	20 p12
201573_s_at		18 x 1	6 p22	eukaryotic translation termination factor 1 pseudogene 1 [Source:HGNC Symbol;Acc:HGNC:3478]
214214_s_at		17 x 3	17 p13
200957_s_at	SSRP1	16 x 1	11 q12	structure specific recognition protein 1 [Source:HGNC Symbol;Acc:HGNC:11327]
201479_at	DKC1	16 x 1	X q28	dyskerin pseudouridine synthase 1 [Source:HGNC Symbol;Acc:HGNC:2890]
209971_x_at	AIMP2	15 x 2	7 p22	aminoacyl tRNA synthetase complex interacting multifunctional protein 2 [Source:HGNC Symbol;Acc:HGNC:20609]
202138_x_at	AIMP2	15 x 2	7 p22	aminoacyl tRNA synthetase complex interacting multifunctional protein 2 [Source:HGNC Symbol;Acc:HGNC:20609]
219575_s_at	COG8	17 x 2	16 q22	component of oligomeric golgi complex 8 [Source:HGNC Symbol;Acc:HGNC:18623]
212832_s_at	CKAP5	14 x 1	11 p11	cytoskeleton associated protein 5 [Source:HGNC Symbol;Acc:HGNC:28959]
203082_at	BMS1	17 x 3	10 q11	BMS1, ribosome biogenesis factor [Source:HGNC Symbol;Acc:HGNC:23505]
206074_s_at	HMGA1	14 x 1	6 p21	high mobility group AT-hook 1 [Source:HGNC Symbol;Acc:HGNC:5010]
200807_s_at	HSPD1	15 x 2	2 q33	heat shock protein family D (Hsp60) member 1 [Source:HGNC Symbol;Acc:HGNC:5261]

## Sheet: Module D
ID	Symbol	Metagene	Chromosome	Description
208502_s_at	PITX1	5 x 1	5 q31	paired like homeodomain 1 [Source:HGNC Symbol;Acc:HGNC:9004]
209587_at	PITX1	7 x 1	5 q31	paired like homeodomain 1 [Source:HGNC Symbol;Acc:HGNC:9004]
218824_at	PNMAL1	6 x 1	19 q13	paraneoplastic Ma antigen family like 1 [Source:HGNC Symbol;Acc:HGNC:25578]
210215_at	TFR2	7 x 1	7 q22	transferrin receptor 2 [Source:HGNC Symbol;Acc:HGNC:11762]
218756_s_at	DHRS11	5 x 4	17 q12	dehydrogenase/reductase 11 [Source:HGNC Symbol;Acc:HGNC:28639]
218976_at	DNAJC12	5 x 1	10 q21	DnaJ heat shock protein family (Hsp40) member C12 [Source:HGNC Symbol;Acc:HGNC:28908]
211363_s_at	MTAP	5 x 5	9 p21	methylthioadenosine phosphorylase [Source:HGNC Symbol;Acc:HGNC:7413]
206777_s_at	CRYBB2	7 x 4	22 q11	crystallin beta B2 [Source:HGNC Symbol;Acc:HGNC:2398]
204798_at	MYB	5 x 1	6 q23	MYB proto-oncogene, transcription factor [Source:HGNC Symbol;Acc:HGNC:7545]
204165_at	WASF1	6 x 1	6 q21	WAS protein family member 1 [Source:HGNC Symbol;Acc:HGNC:12732]
201309_x_at		5 x 1	7 p15
219692_at	KREMEN2	8 x 1	16 p13	kringle containing transmembrane protein 2 [Source:HGNC Symbol;Acc:HGNC:18797]
221606_s_at	HMGN5	7 x 1	X q21	high mobility group nucleosome binding domain 5 [Source:HGNC Symbol;Acc:HGNC:8013]
218145_at	TRIB3	7 x 2	20 p13	tribbles pseudokinase 3 [Source:HGNC Symbol;Acc:HGNC:16228]
212092_at	PEG10	4 x 1	7 q21	paternally expressed 10 [Source:HGNC Symbol;Acc:HGNC:14005]
219264_s_at	PPP2R3B	6 x 1	X p22	protein phosphatase 2 regulatory subunit B''beta [Source:HGNC Symbol;Acc:HGNC:13417]
202016_at	MEST	9 x 1	7 q32	mesoderm specific transcript [Source:HGNC Symbol;Acc:HGNC:7028]
207039_at	CDKN2A	7 x 1	9 p21	cyclin dependent kinase inhibitor 2A [Source:HGNC Symbol;Acc:HGNC:1787]
211658_at		4 x 2
215767_at	ZNF804A	5 x 1	2 q32	zinc finger protein 804A [Source:HGNC Symbol;Acc:HGNC:21711]
209644_x_at	CDKN2A	8 x 1	9 p21	cyclin dependent kinase inhibitor 2A [Source:HGNC Symbol;Acc:HGNC:1787]
204720_s_at	DNAJC6	5 x 1	1 p31	DnaJ heat shock protein family (Hsp40) member C6 [Source:HGNC Symbol;Acc:HGNC:15469]
220892_s_at	PSAT1	1 x 4	9 q21	phosphoserine aminotransferase 1 [Source:HGNC Symbol;Acc:HGNC:19129]
218529_at	CD320	6 x 1	19 p13	CD320 molecule [Source:HGNC Symbol;Acc:HGNC:16692]
219841_at	AICDA	1 x 1	12 p13	activation induced cytidine deaminase [Source:HGNC Symbol;Acc:HGNC:13203]
219968_at	ZNF589	9 x 1	3 p21	zinc finger protein 589 [Source:HGNC Symbol;Acc:HGNC:16747]
218412_s_at	GTF2IRD1	11 x 1	7 q11	GTF2I repeat domain containing 1 [Source:HGNC Symbol;Acc:HGNC:4661]
201397_at	PHGDH	4 x 1	1 p12	phosphoglycerate dehydrogenase [Source:HGNC Symbol;Acc:HGNC:8923]
208814_at	HSPA4	10 x 1	5 q31	heat shock protein family A (Hsp70) member 4 [Source:HGNC Symbol;Acc:HGNC:5237]
208576_s_at	HIST1H3B	8 x 1	6 p22	histone cluster 1 H3 family member b [Source:HGNC Symbol;Acc:HGNC:4776]
204993_at	GNAZ	8 x 1	22 q11	G protein subunit alpha z [Source:HGNC Symbol;Acc:HGNC:4395]
203626_s_at	SKP2	2 x 6	5 p13	S-phase kinase associated protein 2 [Source:HGNC Symbol;Acc:HGNC:10901]
200862_at	DHCR24	1 x 5	1 p32	24-dehydrocholesterol reductase [Source:HGNC Symbol;Acc:HGNC:2859]
203589_s_at	TFDP2	6 x 1	3 q23	transcription factor Dp-2 [Source:HGNC Symbol;Acc:HGNC:11751]
206653_at	POLR3G	3 x 1	5 q14	RNA polymerase III subunit G [Source:HGNC Symbol;Acc:HGNC:30075]
219066_at	PPCDC	8 x 3	15 q24	phosphopantothenoylcysteine decarboxylase [Source:HGNC Symbol;Acc:HGNC:28107]
204956_at	MTAP	8 x 1	9 p21	methylthioadenosine phosphorylase [Source:HGNC Symbol;Acc:HGNC:7413]
204730_at	RIMS3	8 x 1	1 p34	regulating synaptic membrane exocytosis 3 [Source:HGNC Symbol;Acc:HGNC:21292]
205354_at	GAMT	8 x 4	19 p13	guanidinoacetate N-methyltransferase [Source:HGNC Symbol;Acc:HGNC:4136]
219502_at	NEIL3	1 x 1	4 q34	nei like DNA glycosylase 3 [Source:HGNC Symbol;Acc:HGNC:24573]
221909_at	RNFT2	6 x 1	12 q24	ring finger protein, transmembrane 2 [Source:HGNC Symbol;Acc:HGNC:25905]
32402_s_at	SYMPK	6 x 3	19 q13	symplekin [Source:HGNC Symbol;Acc:HGNC:22935]
221640_s_at	PIDD1	7 x 1	11 p15	p53-induced death domain protein 1 [Source:HGNC Symbol;Acc:HGNC:16491]
219474_at	C3orf52	4 x 1	3 q13	chromosome 3 open reading frame 52 [Source:HGNC Symbol;Acc:HGNC:26255]
209776_s_at	SLC19A1	5 x 4	21 q22	solute carrier family 19 member 1 [Source:HGNC Symbol;Acc:HGNC:10937]
219703_at	MNS1	6 x 1	15 q21	meiosis specific nuclear structural 1 [Source:HGNC Symbol;Acc:HGNC:29636]
221219_s_at	KLHDC4	7 x 1	16 q24	kelch domain containing 4 [Source:HGNC Symbol;Acc:HGNC:25272]
200831_s_at	SCD	1 x 5	10 q24	stearoyl-CoA desaturase [Source:HGNC Symbol;Acc:HGNC:10571]
217289_s_at	SLC37A4	3 x 6	11 q23	solute carrier family 37 member 4 [Source:HGNC Symbol;Acc:HGNC:4061]
210206_s_at		2 x 4	12 p13
205429_s_at	MPP6	4 x 2	7 p15	membrane palmitoylated protein 6 [Source:HGNC Symbol;Acc:HGNC:18167]
209681_at	SLC19A2	6 x 1	1 q24	solute carrier family 19 member 2 [Source:HGNC Symbol;Acc:HGNC:10938]
219491_at	LRFN4	6 x 1	11 q13	leucine rich repeat and fibronectin type III domain containing 4 [Source:HGNC Symbol;Acc:HGNC:28456]
205195_at	AP1S1	4 x 5	7 q22	adaptor related protein complex 1 sigma 1 subunit [Source:HGNC Symbol;Acc:HGNC:559]
205025_at	ZBTB48	8 x 3	1 p36	zinc finger and BTB domain containing 48 [Source:HGNC Symbol;Acc:HGNC:4930]
218507_at	HILPDA	1 x 1	7 q32	hypoxia inducible lipid droplet associated [Source:HGNC Symbol;Acc:HGNC:28859]
201791_s_at	DHCR7	7 x 2	11 q13	7-dehydrocholesterol reductase [Source:HGNC Symbol;Acc:HGNC:2860]
205282_at	LRP8	3 x 2	1 p32	LDL receptor related protein 8 [Source:HGNC Symbol;Acc:HGNC:6700]
203680_at	PRKAR2B	5 x 1	7 q22	protein kinase cAMP-dependent type II regulatory subunit beta [Source:HGNC Symbol;Acc:HGNC:9392]
212556_at	SCRIB	8 x 1	8 q24	scribbled planar cell polarity protein [Source:HGNC Symbol;Acc:HGNC:30377]
208506_at	HIST1H3F	10 x 1	6 p22	histone cluster 1 H3 family member f [Source:HGNC Symbol;Acc:HGNC:4773]
218161_s_at	CLN6	9 x 2	15 q23	ceroid-lipofuscinosis, neuronal 6, late infantile, variant [Source:HGNC Symbol;Acc:HGNC:2077]
204495_s_at	C15orf39	7 x 4	15 q24	chromosome 15 open reading frame 39 [Source:HGNC Symbol;Acc:HGNC:24497]
203767_s_at	STS	11 x 1	X p22	steroid sulfatase [Source:HGNC Symbol;Acc:HGNC:11425]
203032_s_at	FH	1 x 6	1 q43	fumarate hydratase [Source:HGNC Symbol;Acc:HGNC:3700]
204735_at	PDE4A	9 x 1	19 p13	phosphodiesterase 4A [Source:HGNC Symbol;Acc:HGNC:8780]
219387_at	CCDC88A	8 x 1	2 p16	coiled-coil domain containing 88A [Source:HGNC Symbol;Acc:HGNC:25523]
203040_s_at	HMBS	5 x 1	11 q23	hydroxymethylbilane synthase [Source:HGNC Symbol;Acc:HGNC:4982]
210653_s_at	BCKDHB	3 x 7	6 q14	branched chain keto acid dehydrogenase E1 subunit beta [Source:HGNC Symbol;Acc:HGNC:987]
203609_s_at	ALDH5A1	7 x 1	6 p22	aldehyde dehydrogenase 5 family member A1 [Source:HGNC Symbol;Acc:HGNC:408]
203588_s_at	TFDP2	5 x 1	3 q23	transcription factor Dp-2 [Source:HGNC Symbol;Acc:HGNC:11751]
210567_s_at	SKP2	4 x 1	5 p13	S-phase kinase associated protein 2 [Source:HGNC Symbol;Acc:HGNC:10901]
206469_x_at	AKR7A3	8 x 5	1 p36	aldo-keto reductase family 7 member A3 [Source:HGNC Symbol;Acc:HGNC:390]
206106_at	MAPK12	6 x 1	22 q13	mitogen-activated protein kinase 12 [Source:HGNC Symbol;Acc:HGNC:6874]
212170_at	RBM12	8 x 1	20 q11	RNA binding motif protein 12 [Source:HGNC Symbol;Acc:HGNC:9898]
216381_x_at	AKR7A3	8 x 5	1 p36	aldo-keto reductase family 7 member A3 [Source:HGNC Symbol;Acc:HGNC:390]
202886_s_at	PPP2R1B	1 x 6	11 q23	protein phosphatase 2 scaffold subunit Abeta [Source:HGNC Symbol;Acc:HGNC:9303]
219785_s_at	C16orf95	4 x 2	16 q24	chromosome 16 open reading frame 95 [Source:HGNC Symbol;Acc:HGNC:40033]
211792_s_at	CDKN2C	7 x 1	1 p32	cyclin dependent kinase inhibitor 2C [Source:HGNC Symbol;Acc:HGNC:1789]
209980_s_at	SHMT1	1 x 5	17 p11	serine hydroxymethyltransferase 1 [Source:HGNC Symbol;Acc:HGNC:10850]
201848_s_at	BNIP3	1 x 5	10 q26	BCL2 interacting protein 3 [Source:HGNC Symbol;Acc:HGNC:1084]
218772_x_at	TMEM38B	5 x 5	9 q31	transmembrane protein 38B [Source:HGNC Symbol;Acc:HGNC:25535]
215708_s_at	PRIM2	2 x 7	6 p11	primase (DNA) subunit 2 [Source:HGNC Symbol;Acc:HGNC:9370]
213562_s_at	SQLE	1 x 6	8 q24	squalene epoxidase [Source:HGNC Symbol;Acc:HGNC:11279]
201849_at	BNIP3	1 x 3	10 q26	BCL2 interacting protein 3 [Source:HGNC Symbol;Acc:HGNC:1084]
202528_at	GALE	5 x 3	1 p36	UDP-galactose-4-epimerase [Source:HGNC Symbol;Acc:HGNC:4116]
214452_at	BCAT1	1 x 5	12 p12	branched chain amino acid transaminase 1 [Source:HGNC Symbol;Acc:HGNC:976]
202925_s_at	PLAGL2	8 x 5	20 q11	PLAG1 like zinc finger 2 [Source:HGNC Symbol;Acc:HGNC:9047]
207396_s_at	ALG3	4 x 4	3 q27	ALG3, alpha-1,3- mannosyltransferase [Source:HGNC Symbol;Acc:HGNC:23056]
211593_s_at	MAST2	11 x 1	1 p34	microtubule associated serine/threonine kinase 2 [Source:HGNC Symbol;Acc:HGNC:19035]
201927_s_at	PKP4	7 x 6	2 q24	plakophilin 4 [Source:HGNC Symbol;Acc:HGNC:9026]
207042_at	E2F2	6 x 4	1 p36	E2F transcription factor 2 [Source:HGNC Symbol;Acc:HGNC:3114]
222206_s_at	NCLN	7 x 3	19 p13	nicalin [Source:HGNC Symbol;Acc:HGNC:26923]
211814_s_at	CCNE2	1 x 4	8 q22	cyclin E2 [Source:HGNC Symbol;Acc:HGNC:1590]
215215_s_at	LOC81691	4 x 1	16 p12	Putative RNA exonuclease NEF-sp [Source:UniProtKB/Swiss-Prot;Acc:Q96IC2]
204266_s_at	CHKA	6 x 1	11 q13	choline kinase alpha [Source:HGNC Symbol;Acc:HGNC:1937]
220011_at	AUNIP	5 x 1	1 p36	aurora kinase A and ninein interacting protein [Source:HGNC Symbol;Acc:HGNC:28363]
219763_at	DENND1A	2 x 3	9 q33	DENN domain containing 1A [Source:HGNC Symbol;Acc:HGNC:29324]
219733_s_at	SLC27A5	5 x 2	19 q13	solute carrier family 27 member 5 [Source:HGNC Symbol;Acc:HGNC:10999]
206066_s_at	RAD51C	3 x 2	17 q22	RAD51 paralog C [Source:HGNC Symbol;Acc:HGNC:9820]
217542_at	MDM2	11 x 1	12 q15	MDM2 proto-oncogene [Source:HGNC Symbol;Acc:HGNC:6973]
201790_s_at	DHCR7	2 x 6	11 q13	7-dehydrocholesterol reductase [Source:HGNC Symbol;Acc:HGNC:2860]
202234_s_at	SLC16A1	7 x 1	1 p13	solute carrier family 16 member 1 [Source:HGNC Symbol;Acc:HGNC:10922]
205196_s_at	AP1S1	3 x 6	7 q22	adaptor related protein complex 1 sigma 1 subunit [Source:HGNC Symbol;Acc:HGNC:559]
219048_at	PIGN	9 x 4	18 q21	phosphatidylinositol glycan anchor biosynthesis class N [Source:HGNC Symbol;Acc:HGNC:8967]
219321_at	MPP5	3 x 6	14 q23	membrane palmitoylated protein 5 [Source:HGNC Symbol;Acc:HGNC:18669]
220058_at	GID4	7 x 6	17 p11	GID complex subunit 4 homolog [Source:HGNC Symbol;Acc:HGNC:28453]
205164_at	GCAT	4 x 1	22 q13	glycine C-acetyltransferase [Source:HGNC Symbol;Acc:HGNC:4188]
222013_x_at	EEF2KMT	8 x 2	16 p13	eukaryotic elongation factor 2 lysine methyltransferase [Source:HGNC Symbol;Acc:HGNC:32221]
91816_f_at	MEX3D	1 x 5	19 p13	mex-3 RNA binding family member D [Source:HGNC Symbol;Acc:HGNC:16734]
213520_at	RECQL4	3 x 1	8 q24	RecQ like helicase 4 [Source:HGNC Symbol;Acc:HGNC:9949]
204827_s_at	CCNF	1 x 4	16 p13	cyclin F [Source:HGNC Symbol;Acc:HGNC:1591]
217640_x_at	SKA1	1 x 1	18 q21	spindle and kinetochore associated complex subunit 1 [Source:HGNC Symbol;Acc:HGNC:28109]
209279_s_at	NSDHL	1 x 5	X q28	NAD(P) dependent steroid dehydrogenase-like [Source:HGNC Symbol;Acc:HGNC:13398]
213310_at	AGO2	5 x 3	8 q24	argonaute 2, RISC catalytic component [Source:HGNC Symbol;Acc:HGNC:3263]
211715_s_at	BDH1	7 x 1	3 q29	3-hydroxybutyrate dehydrogenase 1 [Source:HGNC Symbol;Acc:HGNC:1027]
33494_at	ETFDH	8 x 4	4 q32	electron transfer flavoprotein dehydrogenase [Source:HGNC Symbol;Acc:HGNC:3483]
214220_s_at	ALMS1	8 x 1	2 p13	ALMS1, centrosome and basal body associated protein [Source:HGNC Symbol;Acc:HGNC:428]
218944_at	PYCRL	8 x 3	8 q24	pyrroline-5-carboxylate reductase-like [Source:HGNC Symbol;Acc:HGNC:25846]
202072_at	HNRNPL	5 x 1	19 q13	heterogeneous nuclear ribonucleoprotein L [Source:HGNC Symbol;Acc:HGNC:5045]
211851_x_at	BRCA1	1 x 2	17 q21	BRCA1, DNA repair associated [Source:HGNC Symbol;Acc:HGNC:1100]
219752_at	RASAL1	6 x 1	12 q24	RAS protein activator like 1 [Source:HGNC Symbol;Acc:HGNC:9873]
210410_s_at		6 x 1	6 p21	MSH5-SAPCD1 readthrough (NMD candidate) [Source:HGNC Symbol;Acc:HGNC:41994]
65585_at	FAM86B1	7 x 4	8 p23	family with sequence similarity 86 member B1 [Source:HGNC Symbol;Acc:HGNC:28268]
203017_s_at	SSX2IP	7 x 1	1 p22	SSX family member 2 interacting protein [Source:HGNC Symbol;Acc:HGNC:16509]
218296_x_at		7 x 2	1 q22	misato family member 2, pseudogene [Source:HGNC Symbol;Acc:HGNC:26329]
205048_s_at		4 x 4	7 p11	phosphoserine phosphatase pseudogene 1 [Source:HGNC Symbol;Acc:HGNC:9578]
204264_at	CPT2	9 x 4	1 p32	carnitine palmitoyltransferase 2 [Source:HGNC Symbol;Acc:HGNC:2330]
219972_s_at	PCNX4	8 x 4	14 q23	pecanex homolog 4 (Drosophila) [Source:HGNC Symbol;Acc:HGNC:20349]
214744_s_at	RPL23	8 x 2	17 q12	ribosomal protein L23 [Source:HGNC Symbol;Acc:HGNC:10316]
209052_s_at	NSD2	1 x 5	4 p16	nuclear receptor binding SET domain protein 2 [Source:HGNC Symbol;Acc:HGNC:12766]
203565_s_at	MNAT1	5 x 2	14 q23	MNAT1, CDK activating kinase assembly factor [Source:HGNC Symbol;Acc:HGNC:7181]
201123_s_at	EIF5A	2 x 6	17 p13	eukaryotic translation initiation factor 5A [Source:HGNC Symbol;Acc:HGNC:3300]
201969_at	NASP	6 x 1	1 p34	nuclear autoantigenic sperm protein [Source:HGNC Symbol;Acc:HGNC:7644]
218860_at	NOC4L	6 x 1	12 q24	nucleolar complex associated 4 homolog [Source:HGNC Symbol;Acc:HGNC:28461]
221703_at	BRIP1	6 x 7	17 q23	BRCA1 interacting protein C-terminal helicase 1 [Source:HGNC Symbol;Acc:HGNC:20473]
203869_at	USP46	5 x 6	4 q12	ubiquitin specific peptidase 46 [Source:HGNC Symbol;Acc:HGNC:20075]
65588_at		7 x 1	20 q11	small nucleolar RNA host gene 17 [Source:HGNC Symbol;Acc:HGNC:48600]
220295_x_at	DEPDC1	1 x 1	1 p31	DEP domain containing 1 [Source:HGNC Symbol;Acc:HGNC:22949]
204430_s_at	SLC2A5	2 x 3	1 p36	solute carrier family 2 member 5 [Source:HGNC Symbol;Acc:HGNC:11010]
210255_at	RAD51B	8 x 6	14 q24	RAD51 paralog B [Source:HGNC Symbol;Acc:HGNC:9822]
221078_s_at	CCDC88A	1 x 5	2 p16	coiled-coil domain containing 88A [Source:HGNC Symbol;Acc:HGNC:25523]
209372_x_at	TUBB2A	1 x 5	6 p25	tubulin beta 2A class IIa [Source:HGNC Symbol;Acc:HGNC:12412]
219208_at	FBXO11	9 x 1	2 p16	F-box protein 11 [Source:HGNC Symbol;Acc:HGNC:13590]
216028_at		10 x 1
220387_s_at	HHLA3	8 x 5	1 p31	HERV-H LTR-associating 3 [Source:HGNC Symbol;Acc:HGNC:4906]
202924_s_at	PLAGL2	7 x 6	20 q11	PLAG1 like zinc finger 2 [Source:HGNC Symbol;Acc:HGNC:9047]
218402_s_at	HPS4	8 x 1	22 q12	HPS4, biogenesis of lysosomal organelles complex 3 subunit 2 [Source:HGNC Symbol;Acc:HGNC:15844]
210870_s_at	EPM2A	6 x 5	6 q24	EPM2A, laforin glucan phosphatase [Source:HGNC Symbol;Acc:HGNC:3413]
208107_s_at	LOC81691	11 x 1	16 p12	Putative RNA exonuclease NEF-sp [Source:UniProtKB/Swiss-Prot;Acc:Q96IC2]
205034_at	CCNE2	1 x 1	8 q22	cyclin E2 [Source:HGNC Symbol;Acc:HGNC:1590]
205047_s_at	ASNS	6 x 1	7 q21	asparagine synthetase (glutamine-hydrolyzing) [Source:HGNC Symbol;Acc:HGNC:753]
219408_at	PRMT7	7 x 3	16 q22	protein arginine methyltransferase 7 [Source:HGNC Symbol;Acc:HGNC:25557]
211767_at	GINS4	3 x 1	8 p11	GINS complex subunit 4 [Source:HGNC Symbol;Acc:HGNC:28226]
211899_s_at	TRAF4	3 x 6	17 q11	TNF receptor associated factor 4 [Source:HGNC Symbol;Acc:HGNC:12034]
205085_at	ORC1	1 x 1	1 p32	origin recognition complex subunit 1 [Source:HGNC Symbol;Acc:HGNC:8487]
201728_s_at	KIAA0100	7 x 7	17 q11	KIAA0100 [Source:HGNC Symbol;Acc:HGNC:28960]
204305_at	MIPEP	6 x 4	13 q12	mitochondrial intermediate peptidase [Source:HGNC Symbol;Acc:HGNC:7104]
210457_x_at	HMGA1	1 x 5	6 p21	high mobility group AT-hook 1 [Source:HGNC Symbol;Acc:HGNC:5010]
221069_s_at	TACO1	8 x 4	17 q23	translational activator of cytochrome c oxidase I [Source:HGNC Symbol;Acc:HGNC:24316]
204775_at	CHAF1B	1 x 1	21 q22	chromatin assembly factor 1 subunit B [Source:HGNC Symbol;Acc:HGNC:1911]
203144_s_at	KIAA0040	8 x 1	1 q25	KIAA0040 [Source:HGNC Symbol;Acc:HGNC:28950]
218688_at	TKFC	6 x 6	11 q12	triokinase and FMN cyclase [Source:HGNC Symbol;Acc:HGNC:24552]
222158_s_at	DESI2	10 x 1	1 q44	desumoylating isopeptidase 2 [Source:HGNC Symbol;Acc:HGNC:24264]
202580_x_at	FOXM1	1 x 1	12 p13	forkhead box M1 [Source:HGNC Symbol;Acc:HGNC:3818]
213149_at	DLAT	2 x 3	11 q23	dihydrolipoamide S-acetyltransferase [Source:HGNC Symbol;Acc:HGNC:2896]
210465_s_at	SNAPC3	5 x 7	9 p22	small nuclear RNA activating complex polypeptide 3 [Source:HGNC Symbol;Acc:HGNC:11136]
202407_s_at	PRPF31	1 x 6	19 q13	pre-mRNA processing factor 31 [Source:HGNC Symbol;Acc:HGNC:15446]
204374_s_at	GALK1	2 x 6	17 q25	galactokinase 1 [Source:HGNC Symbol;Acc:HGNC:4118]
205761_s_at	DUS4L	3 x 4	7 q22	dihydrouridine synthase 4 like [Source:HGNC Symbol;Acc:HGNC:21517]
211576_s_at	SLC19A1	6 x 1	21 q22	solute carrier family 19 member 1 [Source:HGNC Symbol;Acc:HGNC:10937]
218560_s_at	JMJD4	9 x 4	1 q42	jumonji domain containing 4 [Source:HGNC Symbol;Acc:HGNC:25724]
202819_s_at	ELOA	6 x 5	1 p36	elongin A [Source:HGNC Symbol;Acc:HGNC:11620]
219372_at	IFT81	7 x 1	12 q24	intraflagellar transport 81 [Source:HGNC Symbol;Acc:HGNC:14313]
214727_at	BRCA2	4 x 2	13 q13	BRCA2, DNA repair associated [Source:HGNC Symbol;Acc:HGNC:1101]
202431_s_at	MYC	6 x 2	8 q24	v-myc avian myelocytomatosis viral oncogene homolog [Source:HGNC Symbol;Acc:HGNC:7553]
203163_at	KATNB1	7 x 4	16 q21	katanin regulatory subunit B1 [Source:HGNC Symbol;Acc:HGNC:6217]
210350_x_at	ING1	6 x 7	13 q34	inhibitor of growth family member 1 [Source:HGNC Symbol;Acc:HGNC:6062]
216228_s_at	WDHD1	1 x 1	14 q22	WD repeat and HMG-box DNA binding protein 1 [Source:HGNC Symbol;Acc:HGNC:23170]
222209_s_at	TMEM135	9 x 5	11 q14	transmembrane protein 135 [Source:HGNC Symbol;Acc:HGNC:26167]
215834_x_at	SCARB1	4 x 7	12 q24	scavenger receptor class B member 1 [Source:HGNC Symbol;Acc:HGNC:1664]
203126_at	IMPA2	5 x 1	18 p11	inositol monophosphatase 2 [Source:HGNC Symbol;Acc:HGNC:6051]
201625_s_at	INSIG1	1 x 6	7 q36	insulin induced gene 1 [Source:HGNC Symbol;Acc:HGNC:6083]
216913_s_at	RRP12	6 x 1	10 q24	ribosomal RNA processing 12 homolog [Source:HGNC Symbol;Acc:HGNC:29100]
200979_at	PDHA1	8 x 3	X p22	pyruvate dehydrogenase (lipoamide) alpha 1 [Source:HGNC Symbol;Acc:HGNC:8806]
218877_s_at	TRMT11	7 x 3	6 q22	tRNA methyltransferase 11 homolog [Source:HGNC Symbol;Acc:HGNC:21080]
215343_at	CCDC88C	9 x 5	14 q32	coiled-coil domain containing 88C [Source:HGNC Symbol;Acc:HGNC:19967]
204459_at	CSTF2	1 x 4	X q22	cleavage stimulation factor subunit 2 [Source:HGNC Symbol;Acc:HGNC:2484]
201819_at	SCARB1	11 x 1	12 q24	scavenger receptor class B member 1 [Source:HGNC Symbol;Acc:HGNC:1664]
203967_at	CDC6	1 x 1	17 q21	cell division cycle 6 [Source:HGNC Symbol;Acc:HGNC:1744]
211088_s_at	PLK4	1 x 5	4 q28	polo like kinase 4 [Source:HGNC Symbol;Acc:HGNC:11397]
37433_at	PIAS2	7 x 5	18 q21	protein inhibitor of activated STAT 2 [Source:HGNC Symbol;Acc:HGNC:17311]
220200_s_at		5 x 3	13 q11	SET domain containing 8 pseudogene 1 [Source:HGNC Symbol;Acc:HGNC:30088]
208940_at	SEPHS1	7 x 1	10 p13	selenophosphate synthetase 1 [Source:HGNC Symbol;Acc:HGNC:19685]
216031_x_at		5 x 6	16 p13
213468_at	ERCC2	8 x 5	19 q13	ERCC excision repair 2, TFIIH core complex helicase subunit [Source:HGNC Symbol;Acc:HGNC:3434]
205167_s_at	CDC25C	2 x 1	5 q31	cell division cycle 25C [Source:HGNC Symbol;Acc:HGNC:1727]
201896_s_at	PSRC1	5 x 1	1 p13	proline and serine rich coiled-coil 1 [Source:HGNC Symbol;Acc:HGNC:24472]
204727_at	WDHD1	5 x 1	14 q22	WD repeat and HMG-box DNA binding protein 1 [Source:HGNC Symbol;Acc:HGNC:23170]
203093_s_at	TIMM44	6 x 2	19 p13	translocase of inner mitochondrial membrane 44 [Source:HGNC Symbol;Acc:HGNC:17316]
220840_s_at	C1orf112	1 x 1	1 q24	chromosome 1 open reading frame 112 [Source:HGNC Symbol;Acc:HGNC:25565]
204394_at	SLC43A1	5 x 1	11 q12	solute carrier family 43 member 1 [Source:HGNC Symbol;Acc:HGNC:9225]
216607_s_at		2 x 7	13 q12	cytochrome P450 family 51 subfamily A member 1 pseudogene 2 [Source:HGNC Symbol;Acc:HGNC:20251]
213402_at	ZNF787	8 x 5	19 q13	zinc finger protein 787 [Source:HGNC Symbol;Acc:HGNC:26998]
209151_x_at	TCF3	3 x 5	19 p13	transcription factor 3 [Source:HGNC Symbol;Acc:HGNC:11633]
218897_at	TMEM177	4 x 1	2 q14	transmembrane protein 177 [Source:HGNC Symbol;Acc:HGNC:28143]
212142_at	MCM4	1 x 4	8 q11	minichromosome maintenance complex component 4 [Source:HGNC Symbol;Acc:HGNC:6947]
215728_s_at	ACOT7	2 x 4	1 p36	acyl-CoA thioesterase 7 [Source:HGNC Symbol;Acc:HGNC:24157]
205194_at	PSPH	6 x 1	7 p11	phosphoserine phosphatase [Source:HGNC Symbol;Acc:HGNC:9577]
214484_s_at	SIGMAR1	1 x 5	9 p13	sigma non-opioid intracellular receptor 1 [Source:HGNC Symbol;Acc:HGNC:8157]
202540_s_at	HMGCR	2 x 3	5 q13	3-hydroxy-3-methylglutaryl-CoA reductase [Source:HGNC Symbol;Acc:HGNC:5006]
208249_s_at	TGDS	8 x 4	13 q32	TDP-glucose 4,6-dehydratase [Source:HGNC Symbol;Acc:HGNC:20324]
220083_x_at	UCHL5	2 x 3	1 q31	ubiquitin C-terminal hydrolase L5 [Source:HGNC Symbol;Acc:HGNC:19678]
215983_s_at	UBXN8	5 x 5	8 p12	UBX domain protein 8 [Source:HGNC Symbol;Acc:HGNC:30307]
218932_at	ZNHIT6	7 x 5	1 p22	zinc finger HIT-type containing 6 [Source:HGNC Symbol;Acc:HGNC:26089]
209832_s_at	CDT1	1 x 1	16 q24	chromatin licensing and DNA replication factor 1 [Source:HGNC Symbol;Acc:HGNC:24576]
215747_s_at	RCC1	3 x 1	1 p35	regulator of chromosome condensation 1 [Source:HGNC Symbol;Acc:HGNC:1913]
208336_s_at	TECR	8 x 5	19 p13	trans-2,3-enoyl-CoA reductase [Source:HGNC Symbol;Acc:HGNC:4551]
214306_at	OPA1	9 x 1	3 q29	OPA1, mitochondrial dynamin like GTPase [Source:HGNC Symbol;Acc:HGNC:8140]
213632_at	DHODH	7 x 3	16 q22	dihydroorotate dehydrogenase (quinone) [Source:HGNC Symbol;Acc:HGNC:2867]
210416_s_at	CHEK2	5 x 1	22 q12	checkpoint kinase 2 [Source:HGNC Symbol;Acc:HGNC:16627]
219967_at	MRM1	7 x 4	17 q12	mitochondrial rRNA methyltransferase 1 [Source:HGNC Symbol;Acc:HGNC:26202]
212568_s_at	DLAT	1 x 4	11 q23	dihydrolipoamide S-acetyltransferase [Source:HGNC Symbol;Acc:HGNC:2896]
212290_at	SLC7A1	6 x 1	13 q12	solute carrier family 7 member 1 [Source:HGNC Symbol;Acc:HGNC:11057]
213312_at	SMIM8	9 x 1	6 q15	small integral membrane protein 8 [Source:HGNC Symbol;Acc:HGNC:21401]
204696_s_at	CDC25A	6 x 1	3 p21	cell division cycle 25A [Source:HGNC Symbol;Acc:HGNC:1725]
216905_s_at	ST14	7 x 1	11 q24	suppression of tumorigenicity 14 [Source:HGNC Symbol;Acc:HGNC:11344]
202094_at	BIRC5	1 x 1	17 q25	baculoviral IAP repeat containing 5 [Source:HGNC Symbol;Acc:HGNC:593]
201436_at	EIF4E	5 x 2	4 q23	eukaryotic translation initiation factor 4E [Source:HGNC Symbol;Acc:HGNC:3287]
211150_s_at	DLAT	1 x 5	11 q23	dihydrolipoamide S-acetyltransferase [Source:HGNC Symbol;Acc:HGNC:2896]
209815_at	PTCH1	11 x 1	9 q22	patched 1 [Source:HGNC Symbol;Acc:HGNC:9585]
209349_at	RAD50	7 x 6	5 q31	RAD50 double strand break repair protein [Source:HGNC Symbol;Acc:HGNC:9816]
202288_at	MTOR	8 x 4	1 p36	mechanistic target of rapamycin [Source:HGNC Symbol;Acc:HGNC:3942]
213610_s_at	KLHL23	5 x 1	2 q31	kelch like family member 23 [Source:HGNC Symbol;Acc:HGNC:27506]
214061_at	TBC1D31	8 x 4	8 q24	TBC1 domain family member 31 [Source:HGNC Symbol;Acc:HGNC:30888]
204675_at	SRD5A1	6 x 4	5 p15	steroid 5 alpha-reductase 1 [Source:HGNC Symbol;Acc:HGNC:11284]
204947_at	E2F1	4 x 1	20 q11	E2F transcription factor 1 [Source:HGNC Symbol;Acc:HGNC:3113]
203790_s_at	RIDA	3 x 3	8 q22	reactive intermediate imine deaminase A homolog [Source:HGNC Symbol;Acc:HGNC:16897]
201072_s_at	SMARCC1	5 x 4	3 p21	SWI/SNF related, matrix associated, actin dependent regulator of chromatin subfamily c member 1 [Source:HGNC Symbol;Acc:HGNC:11104]
218884_s_at	GUF1	3 x 6	4 p12	GUF1 homolog, GTPase [Source:HGNC Symbol;Acc:HGNC:25799]
202463_s_at	MBD3	7 x 1	19 p13	methyl-CpG binding domain protein 3 [Source:HGNC Symbol;Acc:HGNC:6918]
209461_x_at	WDR18	4 x 3	19 p13	WD repeat domain 18 [Source:HGNC Symbol;Acc:HGNC:17956]
214331_at	TSFM	9 x 1	12 q14	Ts translation elongation factor, mitochondrial [Source:HGNC Symbol;Acc:HGNC:12367]
220239_at	KLHL7	2 x 1	7 p15	kelch like family member 7 [Source:HGNC Symbol;Acc:HGNC:15646]
209314_s_at	HBS1L	9 x 2	6 q23	HBS1 like translational GTPase [Source:HGNC Symbol;Acc:HGNC:4834]
219644_at	CEP83	6 x 1	12 q22	centrosomal protein 83 [Source:HGNC Symbol;Acc:HGNC:17966]
201801_s_at	SLC29A1	1 x 6	6 p21	solute carrier family 29 member 1 (Augustine blood group) [Source:HGNC Symbol;Acc:HGNC:11003]
219875_s_at	DESI2	2 x 7	1 q44	desumoylating isopeptidase 2 [Source:HGNC Symbol;Acc:HGNC:24264]
213189_at	MINA	5 x 5	3 q11	ribosomal oxygenase 2 [Source:HGNC Symbol;Acc:HGNC:19441]
219088_s_at	ZNF576	8 x 4	19 q13	zinc finger protein 576 [Source:HGNC Symbol;Acc:HGNC:28357]
212417_at	SCAMP1	9 x 1	5 q14	secretory carrier membrane protein 1 [Source:HGNC Symbol;Acc:HGNC:10563]
219688_at	BBS7	7 x 3	4 q27	Bardet-Biedl syndrome 7 [Source:HGNC Symbol;Acc:HGNC:18758]
219187_at	FKBPL	9 x 3	6 p21	FK506 binding protein like [Source:HGNC Symbol;Acc:HGNC:13949]
201741_x_at	SRSF1	6 x 1	17 q22	serine and arginine rich splicing factor 1 [Source:HGNC Symbol;Acc:HGNC:10780]
214390_s_at	BCAT1	1 x 5	12 p12	branched chain amino acid transaminase 1 [Source:HGNC Symbol;Acc:HGNC:976]
207824_s_at	MAZ	3 x 6	16 p11	MYC associated zinc finger protein [Source:HGNC Symbol;Acc:HGNC:6914]
216574_s_at	RPEL1	5 x 5	10 q24	ribulose-5-phosphate-3-epimerase like 1 [Source:HGNC Symbol;Acc:HGNC:45241]
218848_at	THOC6	5 x 2	16 p13	THO complex 6 [Source:HGNC Symbol;Acc:HGNC:28369]
205530_at	ETFDH	8 x 4	4 q32	electron transfer flavoprotein dehydrogenase [Source:HGNC Symbol;Acc:HGNC:3483]
221598_s_at	MED27	9 x 4	9 q34	mediator complex subunit 27 [Source:HGNC Symbol;Acc:HGNC:2377]
213523_at	CCNE1	2 x 1	19 q12	cyclin E1 [Source:HGNC Symbol;Acc:HGNC:1589]
203711_s_at	HIBCH	3 x 5	2 q32	3-hydroxyisobutyryl-CoA hydrolase [Source:HGNC Symbol;Acc:HGNC:4908]
204315_s_at	GTSE1	1 x 1	22 q13	G2 and S-phase expressed 1 [Source:HGNC Symbol;Acc:HGNC:13698]
206173_x_at	GABPB1	5 x 6	15 q21	GA binding protein transcription factor beta subunit 1 [Source:HGNC Symbol;Acc:HGNC:4074]
214126_at		7 x 4
220089_at	L2HGDH	6 x 1	14 q21	L-2-hydroxyglutarate dehydrogenase [Source:HGNC Symbol;Acc:HGNC:20499]
202387_at	BAG1	7 x 1	9 p13	BCL2 associated athanogene 1 [Source:HGNC Symbol;Acc:HGNC:937]
213289_at	APOOL	4 x 7	X q21	apolipoprotein O like [Source:HGNC Symbol;Acc:HGNC:24009]
213449_at	POP1	5 x 3	8 q22	POP1 homolog, ribonuclease P/MRP subunit [Source:HGNC Symbol;Acc:HGNC:30129]
2028_s_at	E2F1	4 x 1	20 q11	E2F transcription factor 1 [Source:HGNC Symbol;Acc:HGNC:3113]
222250_s_at	INTS7	3 x 3	1 q32	integrator complex subunit 7 [Source:HGNC Symbol;Acc:HGNC:24484]
215084_s_at	LRRC42	1 x 5	1 p32	leucine rich repeat containing 42 [Source:HGNC Symbol;Acc:HGNC:28792]
203805_s_at	FANCA	4 x 1	16 q24	Fanconi anemia complementation group A [Source:HGNC Symbol;Acc:HGNC:3582]
205136_s_at	NUFIP1	7 x 1	13 q14	NUFIP1, FMR1 interacting protein 1 [Source:HGNC Symbol;Acc:HGNC:8057]
200894_s_at	FKBP4	1 x 4	12 p13	FK506 binding protein 4 [Source:HGNC Symbol;Acc:HGNC:3720]
204005_s_at	PAWR	4 x 3	12 q21	pro-apoptotic WT1 regulator [Source:HGNC Symbol;Acc:HGNC:8614]
220651_s_at	MCM10	1 x 1	10 p13	minichromosome maintenance 10 replication initiation factor [Source:HGNC Symbol;Acc:HGNC:18043]
202468_s_at	CTNNAL1	3 x 1	9 q31	catenin alpha like 1 [Source:HGNC Symbol;Acc:HGNC:2512]
218590_at	TWNK	6 x 1	10 q24	twinkle mtDNA helicase [Source:HGNC Symbol;Acc:HGNC:1160]
214095_at	SHMT2	6 x 1	12 q13	serine hydroxymethyltransferase 2 [Source:HGNC Symbol;Acc:HGNC:10852]
204709_s_at	KIF23	1 x 1	15 q23	kinesin family member 23 [Source:HGNC Symbol;Acc:HGNC:6392]
209172_s_at	CENPF	3 x 1	1 q41	centromere protein F [Source:HGNC Symbol;Acc:HGNC:1857]
218365_s_at	DARS2	2 x 3	1 q25	aspartyl-tRNA synthetase 2, mitochondrial [Source:HGNC Symbol;Acc:HGNC:25538]
217445_s_at	GART	2 x 5	21 q22	phosphoribosylglycinamide formyltransferase, phosphoribosylglycinamide synthetase, phosphoribosylaminoimidazole synthetase [Source:HGNC Symbol;Acc:HGNC:4163]
218051_s_at	NT5DC2	2 x 1	3 p21	5'-nucleotidase domain containing 2 [Source:HGNC Symbol;Acc:HGNC:25717]
216503_s_at	MLLT10	6 x 5	10 p12	myeloid/lymphoid or mixed-lineage leukemia; translocated to, 10 [Source:HGNC Symbol;Acc:HGNC:16063]
204128_s_at	RFC3	1 x 2	13 q13	replication factor C subunit 3 [Source:HGNC Symbol;Acc:HGNC:9971]
214583_at	DDI2	6 x 5	1 p36	DNA damage inducible 1 homolog 2 [Source:HGNC Symbol;Acc:HGNC:24578]
212087_s_at	ERAL1	5 x 3	17 q11	Era like 12S mitochondrial rRNA chaperone 1 [Source:HGNC Symbol;Acc:HGNC:3424]
203358_s_at	EZH2	1 x 1	7 q36	enhancer of zeste 2 polycomb repressive complex 2 subunit [Source:HGNC Symbol;Acc:HGNC:3527]
209857_s_at	SPHK2	9 x 6	19 q13	sphingosine kinase 2 [Source:HGNC Symbol;Acc:HGNC:18859]
37577_at	ARHGAP19	8 x 1	10 q24	Rho GTPase activating protein 19 [Source:HGNC Symbol;Acc:HGNC:23724]
213578_at	BMPR1A	10 x 4	10 q23	bone morphogenetic protein receptor type 1A [Source:HGNC Symbol;Acc:HGNC:1076]
203819_s_at	IGF2BP3	1 x 1	7 p15	insulin like growth factor 2 mRNA binding protein 3 [Source:HGNC Symbol;Acc:HGNC:28868]
209608_s_at	ACAT2	2 x 4	6 q25	acetyl-CoA acetyltransferase 2 [Source:HGNC Symbol;Acc:HGNC:94]
210672_s_at	NPRL3	6 x 1	16 p13	NPR3 like, GATOR1 complex subunit [Source:HGNC Symbol;Acc:HGNC:14124]
209624_s_at	MCCC2	1 x 6	5 q13	methylcrotonoyl-CoA carboxylase 2 [Source:HGNC Symbol;Acc:HGNC:6937]
210625_s_at	AKAP1	5 x 4	17 q22	A-kinase anchoring protein 1 [Source:HGNC Symbol;Acc:HGNC:367]
205443_at	SNAPC1	3 x 3	14 q23	small nuclear RNA activating complex polypeptide 1 [Source:HGNC Symbol;Acc:HGNC:11134]
216360_x_at	RRP12	4 x 6	10 q24	ribosomal RNA processing 12 homolog [Source:HGNC Symbol;Acc:HGNC:29100]
32723_at	CSTF1	9 x 3	20 q13	cleavage stimulation factor subunit 1 [Source:HGNC Symbol;Acc:HGNC:2483]
220865_s_at	PDSS1	1 x 1	10 p12	decaprenyl diphosphate synthase subunit 1 [Source:HGNC Symbol;Acc:HGNC:17759]
213859_x_at	SMARCA5	2 x 4	4 q31	SWI/SNF related, matrix associated, actin dependent regulator of chromatin, subfamily a, member 5 [Source:HGNC Symbol;Acc:HGNC:11101]
213983_s_at	PDS5A	3 x 7	4 p14	PDS5 cohesin associated factor A [Source:HGNC Symbol;Acc:HGNC:29088]
204558_at	RAD54L	3 x 1	1 p34	RAD54-like (S. cerevisiae) [Source:HGNC Symbol;Acc:HGNC:9826]
216493_s_at	IGF2BP3	5 x 6	7 p15	insulin like growth factor 2 mRNA binding protein 3 [Source:HGNC Symbol;Acc:HGNC:28868]
204815_s_at	DHX34	2 x 7	19 q13	DExH-box helicase 34 [Source:HGNC Symbol;Acc:HGNC:16719]
208541_x_at	TFAM	6 x 1	10 q21	transcription factor A, mitochondrial [Source:HGNC Symbol;Acc:HGNC:11741]
208492_at	RFXAP	6 x 6	13 q13	regulatory factor X associated protein [Source:HGNC Symbol;Acc:HGNC:9988]
205217_at	TIMM8A	3 x 2	X q22	translocase of inner mitochondrial membrane 8A [Source:HGNC Symbol;Acc:HGNC:11817]
91684_g_at	EXOSC4	3 x 4	8 q24	exosome component 4 [Source:HGNC Symbol;Acc:HGNC:18189]
36830_at	MIPEP	6 x 3	13 q12	mitochondrial intermediate peptidase [Source:HGNC Symbol;Acc:HGNC:7104]
213372_at	PAQR3	8 x 2	4 q21	progestin and adipoQ receptor family member 3 [Source:HGNC Symbol;Acc:HGNC:30130]
211774_s_at	MMACHC	7 x 3	1 p34	methylmalonic aciduria (cobalamin deficiency) cblC type, with homocystinuria [Source:HGNC Symbol;Acc:HGNC:24525]
203597_s_at	WBP4	9 x 4	13 q14	WW domain binding protein 4 [Source:HGNC Symbol;Acc:HGNC:12739]
208955_at	DUT	3 x 1	15 q21	deoxyuridine triphosphatase [Source:HGNC Symbol;Acc:HGNC:3078]
201937_s_at	DNPEP	3 x 6	2 q35	aspartyl aminopeptidase [Source:HGNC Symbol;Acc:HGNC:2981]
204531_s_at	BRCA1	1 x 1	17 q21	BRCA1, DNA repair associated [Source:HGNC Symbol;Acc:HGNC:1100]
219650_at	ERCC6L	1 x 1	X q13	ERCC excision repair 6 like, spindle assembly checkpoint helicase [Source:HGNC Symbol;Acc:HGNC:20794]
203207_s_at	MTFR1	5 x 6	8 q13	mitochondrial fission regulator 1 [Source:HGNC Symbol;Acc:HGNC:29510]
200874_s_at	NOP56	6 x 3	20 p13	NOP56 ribonucleoprotein [Source:HGNC Symbol;Acc:HGNC:15911]
219306_at	KIF15	1 x 1	3 p21	kinesin family member 15 [Source:HGNC Symbol;Acc:HGNC:17273]
209712_at	SLC35D1	9 x 5	1 p31	solute carrier family 35 member D1 [Source:HGNC Symbol;Acc:HGNC:20800]
210537_s_at	TADA2A	1 x 6	17 q12	transcriptional adaptor 2A [Source:HGNC Symbol;Acc:HGNC:11531]
218758_s_at	RRP1	8 x 1	21 q22	ribosomal RNA processing 1 [Source:HGNC Symbol;Acc:HGNC:18785]
220789_s_at	TBRG4	5 x 2	7 p13	transforming growth factor beta regulator 4 [Source:HGNC Symbol;Acc:HGNC:17443]
212710_at	CAMSAP1	8 x 1	9 q34	calmodulin regulated spectrin associated protein 1 [Source:HGNC Symbol;Acc:HGNC:19946]
220707_s_at	FOXRED2	4 x 7	22 q12	FAD dependent oxidoreductase domain containing 2 [Source:HGNC Symbol;Acc:HGNC:26264]
216863_s_at	MORC2	3 x 4	22 q12	MORC family CW-type zinc finger 2 [Source:HGNC Symbol;Acc:HGNC:23573]
220238_s_at	KLHL7	3 x 4	7 p15	kelch like family member 7 [Source:HGNC Symbol;Acc:HGNC:15646]
203816_at	DGUOK	9 x 3	2 p13	deoxyguanosine kinase [Source:HGNC Symbol;Acc:HGNC:2858]
202937_x_at	RRP7A	4 x 1	22 q13	ribosomal RNA processing 7 homolog A [Source:HGNC Symbol;Acc:HGNC:24286]
218766_s_at	WARS2	5 x 5	1 p12	tryptophanyl tRNA synthetase 2, mitochondrial [Source:HGNC Symbol;Acc:HGNC:12730]
222335_at	TGS1	8 x 1	8 q12	trimethylguanosine synthase 1 [Source:HGNC Symbol;Acc:HGNC:17843]
203577_at	GTF2H4	6 x 4	6 p21	general transcription factor IIH subunit 4 [Source:HGNC Symbol;Acc:HGNC:4658]
204900_x_at	SAP30	1 x 2	4 q34	Sin3A associated protein 30 [Source:HGNC Symbol;Acc:HGNC:10532]
213333_at	MDH2	9 x 4	7 q11	malate dehydrogenase 2 [Source:HGNC Symbol;Acc:HGNC:6971]
203968_s_at	CDC6	1 x 1	17 q21	cell division cycle 6 [Source:HGNC Symbol;Acc:HGNC:1744]
204566_at	PPM1D	6 x 6	17 q23	protein phosphatase, Mg2+/Mn2+ dependent 1D [Source:HGNC Symbol;Acc:HGNC:9277]
203489_at	SIVA1	5 x 3	14 q32	SIVA1 apoptosis inducing factor [Source:HGNC Symbol;Acc:HGNC:17712]
41858_at	PGAP2	7 x 3	11 p15	post-GPI attachment to proteins 2 [Source:HGNC Symbol;Acc:HGNC:17893]
219068_x_at	ATAD3A	6 x 1	1 p36	ATPase family, AAA domain containing 3A [Source:HGNC Symbol;Acc:HGNC:25567]
218767_at	REXO4	8 x 3	9 q34	REX4 homolog, 3'-5' exonuclease [Source:HGNC Symbol;Acc:HGNC:12820]
218894_s_at	MAGOHB	2 x 1	12 p13	mago homolog B, exon junction complex core component [Source:HGNC Symbol;Acc:HGNC:25504]
209017_s_at	LONP1	6 x 1	19 p13	lon peptidase 1, mitochondrial [Source:HGNC Symbol;Acc:HGNC:9479]
212110_at	SLC39A14	1 x 3	8 p21	solute carrier family 39 member 14 [Source:HGNC Symbol;Acc:HGNC:20858]
209421_at	MSH2	1 x 4	2 p21	mutS homolog 2 [Source:HGNC Symbol;Acc:HGNC:7325]
209434_s_at	PPAT	3 x 1	4 q12	phosphoribosyl pyrophosphate amidotransferase [Source:HGNC Symbol;Acc:HGNC:9238]
211949_s_at	NOLC1	1 x 4	10 q24	nucleolar and coiled-body phosphoprotein 1 [Source:HGNC Symbol;Acc:HGNC:15608]
209891_at	SPC25	1 x 1	2 q31	SPC25, NDC80 kinetochore complex component [Source:HGNC Symbol;Acc:HGNC:24031]
201802_at	SLC29A1	1 x 3	6 p21	solute carrier family 29 member 1 (Augustine blood group) [Source:HGNC Symbol;Acc:HGNC:11003]
219556_at	C16orf59	5 x 1	16 p13	chromosome 16 open reading frame 59 [Source:HGNC Symbol;Acc:HGNC:25849]
219177_at	BRIX1	6 x 1	5 p13	BRX1, biogenesis of ribosomes [Source:HGNC Symbol;Acc:HGNC:24170]
217185_s_at		4 x 5	6 q21	zinc finger protein 259 pseudogene 1 [Source:HGNC Symbol;Acc:HGNC:13052]
215629_s_at		6 x 1	13 q14	deleted in lymphocytic leukemia 2 (non-protein coding) [Source:HGNC Symbol;Acc:HGNC:13748]
204016_at	LARS2	9 x 1	3 p21	leucyl-tRNA synthetase 2, mitochondrial [Source:HGNC Symbol;Acc:HGNC:17095]
204492_at	ARHGAP11A	5 x 1	15 q13	Rho GTPase activating protein 11A [Source:HGNC Symbol;Acc:HGNC:15783]
209196_at	WDR46	5 x 3	6 p21	WD repeat domain 46 [Source:HGNC Symbol;Acc:HGNC:13923]
201797_s_at	VARS	5 x 2	6 p21	valyl-tRNA synthetase [Source:HGNC Symbol;Acc:HGNC:12651]
219291_at	DTWD1	8 x 7	15 q21	DTW domain containing 1 [Source:HGNC Symbol;Acc:HGNC:30926]
220255_at	FANCE	9 x 3	6 p21	Fanconi anemia complementation group E [Source:HGNC Symbol;Acc:HGNC:3586]
205124_at	MEF2B	11 x 1	19 p13	myocyte enhancer factor 2B [Source:HGNC Symbol;Acc:HGNC:6995]
219758_at	TTC26	7 x 5	7 q34	tetratricopeptide repeat domain 26 [Source:HGNC Symbol;Acc:HGNC:21882]
203560_at	GGH	1 x 2	8 q12	gamma-glutamyl hydrolase [Source:HGNC Symbol;Acc:HGNC:4248]
221649_s_at	PPAN	5 x 1	19 p13	peter pan homolog (Drosophila) [Source:HGNC Symbol;Acc:HGNC:9227]
201521_s_at	NCBP2	5 x 6	3 q29	nuclear cap binding protein subunit 2 [Source:HGNC Symbol;Acc:HGNC:7659]
204957_at	ORC5	2 x 3	7 q22	origin recognition complex subunit 5 [Source:HGNC Symbol;Acc:HGNC:8491]
203235_at	THOP1	2 x 2	19 p13	thimet oligopeptidase 1 [Source:HGNC Symbol;Acc:HGNC:11793]
213518_at	PRKCI	10 x 1	3 q26	protein kinase C iota [Source:HGNC Symbol;Acc:HGNC:9404]
218111_s_at	CMAS	5 x 5	12 p12	cytidine monophosphate N-acetylneuraminic acid synthetase [Source:HGNC Symbol;Acc:HGNC:18290]
211450_s_at	MSH6	1 x 6	2 p16	mutS homolog 6 [Source:HGNC Symbol;Acc:HGNC:7329]
212218_s_at	FASN	6 x 3	17 q25	fatty acid synthase [Source:HGNC Symbol;Acc:HGNC:3594]
204317_at	GTSE1	2 x 1	22 q13	G2 and S-phase expressed 1 [Source:HGNC Symbol;Acc:HGNC:13698]
210692_s_at		1 x 5	11 q12
219244_s_at	MRPL46	4 x 3	15 q25	mitochondrial ribosomal protein L46 [Source:HGNC Symbol;Acc:HGNC:1192]
204853_at	ORC2	7 x 6	2 q33	origin recognition complex subunit 2 [Source:HGNC Symbol;Acc:HGNC:8488]
207348_s_at	LIG3	5 x 5	17 q12	DNA ligase 3 [Source:HGNC Symbol;Acc:HGNC:6600]
218653_at		5 x 1
205210_at	TGFBRAP1	6 x 7	2 q12	transforming growth factor beta receptor associated protein 1 [Source:HGNC Symbol;Acc:HGNC:16836]
209731_at	NTHL1	7 x 1	16 p13	nth like DNA glycosylase 1 [Source:HGNC Symbol;Acc:HGNC:8028]
202903_at	LSM5	7 x 2	7 p14	LSM5 homolog, U6 small nuclear RNA and mRNA degradation associated [Source:HGNC Symbol;Acc:HGNC:17162]
204113_at	CELF1	3 x 5	11 p11	CUGBP Elav-like family member 1 [Source:HGNC Symbol;Acc:HGNC:2549]
215030_at	GRSF1	10 x 1	4 q13	G-rich RNA sequence binding factor 1 [Source:HGNC Symbol;Acc:HGNC:4610]
215218_s_at	WDR62	4 x 1	19 q13	WD repeat domain 62 [Source:HGNC Symbol;Acc:HGNC:24502]
204795_at	PRR3	5 x 2	6 p21	proline rich 3 [Source:HGNC Symbol;Acc:HGNC:21149]
201563_at		6 x 2	15 q21	sorbitol dehydrogenase 2, pseudogene [Source:HGNC Symbol;Acc:HGNC:49919]
214045_at	LIAS	6 x 5	4 p14	lipoic acid synthetase [Source:HGNC Symbol;Acc:HGNC:16429]
219148_at	PBK	1 x 1	8 p21	PDZ binding kinase [Source:HGNC Symbol;Acc:HGNC:18282]
203820_s_at	IGF2BP3	1 x 1	7 p15	insulin like growth factor 2 mRNA binding protein 3 [Source:HGNC Symbol;Acc:HGNC:28868]
217216_x_at	MLH3	8 x 7	14 q24	mutL homolog 3 [Source:HGNC Symbol;Acc:HGNC:7128]
207828_s_at	CENPF	1 x 1	1 q41	centromere protein F [Source:HGNC Symbol;Acc:HGNC:1857]
212877_at		9 x 1	14 q32
220762_s_at	GNB1L	9 x 3	22 q11	G protein subunit beta 1 like [Source:HGNC Symbol;Acc:HGNC:4397]
218470_at	YARS2	11 x 2	12 p11	tyrosyl-tRNA synthetase 2 [Source:HGNC Symbol;Acc:HGNC:24249]
205661_s_at	FLAD1	4 x 6	1 q21	flavin adenine dinucleotide synthetase 1 [Source:HGNC Symbol;Acc:HGNC:24671]
203692_s_at	E2F3	10 x 2	6 p22	E2F transcription factor 3 [Source:HGNC Symbol;Acc:HGNC:3115]
219311_at	CEP76	4 x 3	18 p11	centrosomal protein 76 [Source:HGNC Symbol;Acc:HGNC:25727]
208119_s_at	ZNF93	11 x 1	19 p12	zinc finger protein 93 [Source:HGNC Symbol;Acc:HGNC:13169]
203428_s_at	ASF1A	1 x 5	6 q22	anti-silencing function 1A histone chaperone [Source:HGNC Symbol;Acc:HGNC:20995]
201562_s_at		5 x 5	15 q21	sorbitol dehydrogenase 2, pseudogene [Source:HGNC Symbol;Acc:HGNC:49919]
218585_s_at	DTL	1 x 1	1 q32	denticleless E3 ubiquitin protein ligase homolog [Source:HGNC Symbol;Acc:HGNC:30288]
218984_at	PUS7	3 x 1	7 q22	pseudouridylate synthase 7 (putative) [Source:HGNC Symbol;Acc:HGNC:26033]
204695_at	CDC25A	1 x 1	3 p21	cell division cycle 25A [Source:HGNC Symbol;Acc:HGNC:1725]
204838_s_at	MLH3	10 x 3	14 q24	mutL homolog 3 [Source:HGNC Symbol;Acc:HGNC:7128]
218695_at	EXOSC4	3 x 3	8 q24	exosome component 4 [Source:HGNC Symbol;Acc:HGNC:18189]
206495_s_at	HINFP	9 x 6	11 q23	histone H4 transcription factor [Source:HGNC Symbol;Acc:HGNC:17850]
219769_at	INCENP	8 x 6	11 q12	inner centromere protein [Source:HGNC Symbol;Acc:HGNC:6058]
218128_at	NFYB	9 x 3	12 q23	nuclear transcription factor Y subunit beta [Source:HGNC Symbol;Acc:HGNC:7805]
203015_s_at	SSX2IP	5 x 1	1 p22	SSX family member 2 interacting protein [Source:HGNC Symbol;Acc:HGNC:16509]
203160_s_at	RNF8	8 x 2	6 p21	ring finger protein 8 [Source:HGNC Symbol;Acc:HGNC:10071]
220060_s_at	PARPBP	4 x 1	12 q23	PARP1 binding protein [Source:HGNC Symbol;Acc:HGNC:26074]
205260_s_at	ACYP1	4 x 1	14 q24	acylphosphatase 1 [Source:HGNC Symbol;Acc:HGNC:179]
203283_s_at	HS2ST1	11 x 1	1 p22	heparan sulfate 2-O-sulfotransferase 1 [Source:HGNC Symbol;Acc:HGNC:5193]
213508_at	SPTSSA	10 x 3	14 q13	serine palmitoyltransferase small subunit A [Source:HGNC Symbol;Acc:HGNC:20361]
220183_s_at	NUDT6	7 x 3	4 q28	nudix hydrolase 6 [Source:HGNC Symbol;Acc:HGNC:8053]
215509_s_at	BUB1	1 x 4	2 q13	BUB1 mitotic checkpoint serine/threonine kinase [Source:HGNC Symbol;Acc:HGNC:1148]
219294_at	CENPQ	8 x 4	6 p12	centromere protein Q [Source:HGNC Symbol;Acc:HGNC:21347]
203975_s_at	CHAF1A	4 x 1	19 p13	chromatin assembly factor 1 subunit A [Source:HGNC Symbol;Acc:HGNC:1910]
203957_at	E2F6	3 x 4	2 p25	E2F transcription factor 6 [Source:HGNC Symbol;Acc:HGNC:3120]
212214_at	OPA1	7 x 6	3 q29	OPA1, mitochondrial dynamin like GTPase [Source:HGNC Symbol;Acc:HGNC:8140]
213098_at	CNOT9	3 x 4	2 q35	CCR4-NOT transcription complex subunit 9 [Source:HGNC Symbol;Acc:HGNC:10445]
212510_at	GPD1L	8 x 1	3 p22	glycerol-3-phosphate dehydrogenase 1-like [Source:HGNC Symbol;Acc:HGNC:28956]
202613_at	CTPS1	1 x 1	1 p34	CTP synthase 1 [Source:HGNC Symbol;Acc:HGNC:2519]
221189_s_at	TARS2	10 x 4	1 q21	threonyl-tRNA synthetase 2, mitochondrial (putative) [Source:HGNC Symbol;Acc:HGNC:30740]
203109_at	UBE2M	1 x 5	19 q13	ubiquitin conjugating enzyme E2 M [Source:HGNC Symbol;Acc:HGNC:12491]
204807_at	TMEM5	9 x 3	12 q14	transmembrane protein 5 [Source:HGNC Symbol;Acc:HGNC:13530]
204033_at	TRIP13	1 x 1	5 p15	thyroid hormone receptor interactor 13 [Source:HGNC Symbol;Acc:HGNC:12307]
203646_at	FDX1	1 x 5	11 q22	ferredoxin 1 [Source:HGNC Symbol;Acc:HGNC:3638]
204603_at	EXO1	2 x 1	1 q43	exonuclease 1 [Source:HGNC Symbol;Acc:HGNC:3511]
211212_s_at	ORC5	3 x 6	7 q22	origin recognition complex subunit 5 [Source:HGNC Symbol;Acc:HGNC:8491]
222118_at	CENPN	4 x 1	16 q23	centromere protein N [Source:HGNC Symbol;Acc:HGNC:30873]
203145_at	SPAG5	1 x 1	17 q11	sperm associated antigen 5 [Source:HGNC Symbol;Acc:HGNC:13452]
214144_at		7 x 3	2 q14
209053_s_at	NSD2	1 x 2	4 p16	nuclear receptor binding SET domain protein 2 [Source:HGNC Symbol;Acc:HGNC:12766]
221487_s_at		2 x 6	14 q31	endosulfine alpha pseudogene 2 [Source:HGNC Symbol;Acc:HGNC:20011]
218408_at	TIMM10	1 x 3	11 q12	translocase of inner mitochondrial membrane 10 [Source:HGNC Symbol;Acc:HGNC:11814]
219203_at	EMC9	6 x 2	14 q12	ER membrane protein complex subunit 9 [Source:HGNC Symbol;Acc:HGNC:20273]
205240_at	GPSM2	3 x 1	1 p13	G-protein signaling modulator 2 [Source:HGNC Symbol;Acc:HGNC:29501]
210334_x_at	BIRC5	1 x 1	17 q25	baculoviral IAP repeat containing 5 [Source:HGNC Symbol;Acc:HGNC:593]
222037_at	MCM4	1 x 1	8 q11	minichromosome maintenance complex component 4 [Source:HGNC Symbol;Acc:HGNC:6947]
203194_s_at	NUP98	1 x 6	11 p15	nucleoporin 98 [Source:HGNC Symbol;Acc:HGNC:8068]
204826_at	CCNF	2 x 1	16 p13	cyclin F [Source:HGNC Symbol;Acc:HGNC:1591]
218480_at	AGBL5	7 x 4	2 p23	ATP/GTP binding protein like 5 [Source:HGNC Symbol;Acc:HGNC:26147]
205780_at	BIK	1 x 1	22 q13	BCL2 interacting killer [Source:HGNC Symbol;Acc:HGNC:1051]
210585_s_at	TNPO2	6 x 7	19 p13	transportin 2 [Source:HGNC Symbol;Acc:HGNC:19998]
207891_s_at	HAUS7	4 x 2	X q28	HAUS augmin like complex subunit 7 [Source:HGNC Symbol;Acc:HGNC:32979]
205588_s_at	FGFR1OP	3 x 3	6 q27	FGFR1 oncogene partner [Source:HGNC Symbol;Acc:HGNC:17012]
219512_at	DSN1	9 x 1	20 q11	DSN1 homolog, MIS12 kinetochore complex component [Source:HGNC Symbol;Acc:HGNC:16165]
219470_x_at	CCNJ	7 x 5	10 q24	cyclin J [Source:HGNC Symbol;Acc:HGNC:23434]
220643_s_at	FAIM	5 x 3	3 q22	Fas apoptotic inhibitory molecule [Source:HGNC Symbol;Acc:HGNC:18703]
204521_at	FAM216A	6 x 1	12 q24	family with sequence similarity 216 member A [Source:HGNC Symbol;Acc:HGNC:30180]
205395_s_at	MRE11	10 x 1	11 q21	MRE11 homolog, double strand break repair nuclease [Source:HGNC Symbol;Acc:HGNC:7230]
210415_s_at	ODF2	4 x 6	9 q34	outer dense fiber of sperm tails 2 [Source:HGNC Symbol;Acc:HGNC:8114]
221922_at	GPSM2	3 x 1	1 p13	G-protein signaling modulator 2 [Source:HGNC Symbol;Acc:HGNC:29501]
218602_s_at		8 x 1	7 p12	HAUS augmin like complex subunit 6 pseudogene 3 [Source:HGNC Symbol;Acc:HGNC:50772]
203763_at	DYNC2LI1	10 x 4	2 p21	dynein cytoplasmic 2 light intermediate chain 1 [Source:HGNC Symbol;Acc:HGNC:24595]
204133_at	RRP9	3 x 4	3 p21	ribosomal RNA processing 9, small subunit (SSU) processome component, homolog (yeast) [Source:HGNC Symbol;Acc:HGNC:16829]
213701_at	C12orf29	9 x 3	12 q21	chromosome 12 open reading frame 29 [Source:HGNC Symbol;Acc:HGNC:25322]
212282_at	TMEM97	1 x 1	17 q11	transmembrane protein 97 [Source:HGNC Symbol;Acc:HGNC:28106]
209257_s_at	SMC3	6 x 7	10 q25	structural maintenance of chromosomes 3 [Source:HGNC Symbol;Acc:HGNC:2468]
213365_at	ERI2	3 x 1	16 p12	ERI1 exoribonuclease family member 2 [Source:HGNC Symbol;Acc:HGNC:30541]
201946_s_at	CCT2	3 x 6	12 q15	chaperonin containing TCP1 subunit 2 [Source:HGNC Symbol;Acc:HGNC:1615]
204123_at	LIG3	5 x 3	17 q12	DNA ligase 3 [Source:HGNC Symbol;Acc:HGNC:6600]
204899_s_at	SAP30	2 x 4	4 q34	Sin3A associated protein 30 [Source:HGNC Symbol;Acc:HGNC:10532]
204510_at	CDC7	3 x 1	1 p22	cell division cycle 7 [Source:HGNC Symbol;Acc:HGNC:1745]
212881_at	PIAS4	9 x 5	19 p13	protein inhibitor of activated STAT 4 [Source:HGNC Symbol;Acc:HGNC:17002]
216302_at	HNRNPCL1	9 x 5	1 p36	heterogeneous nuclear ribonucleoprotein C-like 1 [Source:HGNC Symbol;Acc:HGNC:29295]
218875_s_at	FBXO5	1 x 1	6 q25	F-box protein 5 [Source:HGNC Symbol;Acc:HGNC:13584]
204159_at	CDKN2C	1 x 1	1 p32	cyclin dependent kinase inhibitor 2C [Source:HGNC Symbol;Acc:HGNC:1789]
204126_s_at	CDC45	1 x 1	22 q11	cell division cycle 45 [Source:HGNC Symbol;Acc:HGNC:1739]
201490_s_at	PPIF	1 x 6	10 q22	peptidylprolyl isomerase F [Source:HGNC Symbol;Acc:HGNC:9259]
205393_s_at	CHEK1	1 x 1	11 q24	checkpoint kinase 1 [Source:HGNC Symbol;Acc:HGNC:1925]
204507_s_at	PPP3R1	1 x 5	2 p14	protein phosphatase 3 regulatory subunit B, alpha [Source:HGNC Symbol;Acc:HGNC:9317]
218578_at	CDC73	1 x 4	1 q31	cell division cycle 73 [Source:HGNC Symbol;Acc:HGNC:16783]
203870_at	USP46	8 x 5	4 q12	ubiquitin specific peptidase 46 [Source:HGNC Symbol;Acc:HGNC:20075]
201501_s_at	GRSF1	10 x 4	4 q13	G-rich RNA sequence binding factor 1 [Source:HGNC Symbol;Acc:HGNC:4610]
204244_s_at	DBF4	6 x 1	7 q21	DBF4 zinc finger [Source:HGNC Symbol;Acc:HGNC:17364]
218536_at	MRS2	9 x 6	6 p22	MRS2, magnesium transporter [Source:HGNC Symbol;Acc:HGNC:13785]
218664_at	MECR	4 x 4	1 p35	mitochondrial trans-2-enoyl-CoA reductase [Source:HGNC Symbol;Acc:HGNC:19691]
210543_s_at	PRKDC	1 x 3	8 q11	protein kinase, DNA-activated, catalytic polypeptide [Source:HGNC Symbol;Acc:HGNC:9413]
203239_s_at	CNOT3	7 x 5	19 q13	CCR4-NOT transcription complex subunit 3 [Source:HGNC Symbol;Acc:HGNC:7879]
202240_at	PLK1	1 x 1	16 p12	polo like kinase 1 [Source:HGNC Symbol;Acc:HGNC:9077]
204634_at	NEK4	8 x 4	3 p21	NIMA related kinase 4 [Source:HGNC Symbol;Acc:HGNC:11399]
202183_s_at	KIF22	2 x 1	16 p11	kinesin family member 22 [Source:HGNC Symbol;Acc:HGNC:6391]
213599_at	OIP5	1 x 1	15 q15	Opa interacting protein 5 [Source:HGNC Symbol;Acc:HGNC:20300]
210114_at	INVS	10 x 3	9 q31	inversin [Source:HGNC Symbol;Acc:HGNC:17870]
202179_at	BLMH	1 x 4	17 q11	bleomycin hydrolase [Source:HGNC Symbol;Acc:HGNC:1059]
221258_s_at	KIF18A	1 x 1	11 p14	kinesin family member 18A [Source:HGNC Symbol;Acc:HGNC:29441]
204835_at	POLA1	1 x 1	X p22	DNA polymerase alpha 1, catalytic subunit [Source:HGNC Symbol;Acc:HGNC:9173]
204125_at	NDUFAF1	1 x 4	15 q15	NADH:ubiquinone oxidoreductase complex assembly factor 1 [Source:HGNC Symbol;Acc:HGNC:18828]
213129_s_at	GCSH	5 x 1	16 q23	glycine cleavage system protein H [Source:HGNC Symbol;Acc:HGNC:4208]
212490_at	DNAJC8	9 x 5	1 p35	DnaJ heat shock protein family (Hsp40) member C8 [Source:HGNC Symbol;Acc:HGNC:15470]
220171_x_at	GPALPP1	5 x 4	13 q14	GPALPP motifs containing 1 [Source:HGNC Symbol;Acc:HGNC:20298]
205733_at	BLM	4 x 1	15 q26	Bloom syndrome RecQ like helicase [Source:HGNC Symbol;Acc:HGNC:1058]
201830_s_at	NET1	1 x 6	10 p15	neuroepithelial cell transforming 1 [Source:HGNC Symbol;Acc:HGNC:14592]
202417_at	KEAP1	1 x 4	19 p13	kelch like ECH associated protein 1 [Source:HGNC Symbol;Acc:HGNC:23177]
216870_x_at		6 x 1	13 q14	deleted in lymphocytic leukemia 2 (non-protein coding) [Source:HGNC Symbol;Acc:HGNC:13748]
205449_at	SAC3D1	1 x 1	11 q13	SAC3 domain containing 1 [Source:HGNC Symbol;Acc:HGNC:30179]
219990_at	E2F8	1 x 1	11 p15	E2F transcription factor 8 [Source:HGNC Symbol;Acc:HGNC:24727]
209533_s_at	PLAA	4 x 5	9 p21	phospholipase A2 activating protein [Source:HGNC Symbol;Acc:HGNC:9043]
211337_s_at	TUBGCP4	5 x 4	15 q15	tubulin gamma complex associated protein 4 [Source:HGNC Symbol;Acc:HGNC:16691]
201516_at	SRM	6 x 1	1 p36	spermidine synthase [Source:HGNC Symbol;Acc:HGNC:11296]
210559_s_at	CDK1	1 x 1	10 q21	cyclin dependent kinase 1 [Source:HGNC Symbol;Acc:HGNC:1722]
208453_s_at	XPNPEP1	1 x 5	10 q25	X-prolyl aminopeptidase 1 [Source:HGNC Symbol;Acc:HGNC:12822]
204641_at	NEK2	1 x 1	1 q32	NIMA related kinase 2 [Source:HGNC Symbol;Acc:HGNC:7745]
208930_s_at	ILF3	1 x 6	19 p13	interleukin enhancer binding factor 3 [Source:HGNC Symbol;Acc:HGNC:6038]
205519_at	WDR76	3 x 1	15 q15	WD repeat domain 76 [Source:HGNC Symbol;Acc:HGNC:25773]
203114_at	SSSCA1	4 x 6	11 q13	Sjogren syndrome/scleroderma autoantigen 1 [Source:HGNC Symbol;Acc:HGNC:11328]
204817_at	ESPL1	1 x 1	12 q13	extra spindle pole bodies like 1, separase [Source:HGNC Symbol;Acc:HGNC:16856]
203284_s_at	HS2ST1	11 x 2	1 p22	heparan sulfate 2-O-sulfotransferase 1 [Source:HGNC Symbol;Acc:HGNC:5193]
209759_s_at	ECI1	8 x 3	16 p13	enoyl-CoA delta isomerase 1 [Source:HGNC Symbol;Acc:HGNC:2703]
214086_s_at	PARP2	2 x 1	14 q11	poly(ADP-ribose) polymerase 2 [Source:HGNC Symbol;Acc:HGNC:272]
202883_s_at	PPP2R1B	8 x 1	11 q23	protein phosphatase 2 scaffold subunit Abeta [Source:HGNC Symbol;Acc:HGNC:9303]
212281_s_at	TMEM97	1 x 1	17 q11	transmembrane protein 97 [Source:HGNC Symbol;Acc:HGNC:28106]
205565_s_at	FXN	7 x 1	9 q21	frataxin [Source:HGNC Symbol;Acc:HGNC:3951]
205046_at	CENPE	1 x 1	4 q24	centromere protein E [Source:HGNC Symbol;Acc:HGNC:1856]
222064_s_at	AARSD1	7 x 1	17 q21	alanyl-tRNA synthetase domain containing 1 [Source:HGNC Symbol;Acc:HGNC:28417]
44065_at	RITA1	6 x 1	12 q24	RBPJ interacting and tubulin associated 1 [Source:HGNC Symbol;Acc:HGNC:25925]
203023_at	NOP16	5 x 1	5 q35	NOP16 nucleolar protein [Source:HGNC Symbol;Acc:HGNC:26934]
219366_at	AVEN	6 x 3	15 q14	apoptosis and caspase activation inhibitor [Source:HGNC Symbol;Acc:HGNC:13509]
202199_s_at	SRPK1	4 x 7	6 p21	SRSF protein kinase 1 [Source:HGNC Symbol;Acc:HGNC:11305]
201246_s_at	OTUB1	7 x 5	11 q13	OTU deubiquitinase, ubiquitin aldehyde binding 1 [Source:HGNC Symbol;Acc:HGNC:23077]
40273_at	SPHK2	9 x 5	19 q13	sphingosine kinase 2 [Source:HGNC Symbol;Acc:HGNC:18859]
204226_at	STAU2	11 x 1	8 q21	staufen double-stranded RNA binding protein 2 [Source:HGNC Symbol;Acc:HGNC:11371]
221589_s_at	ALDH6A1	9 x 5	14 q24	aldehyde dehydrogenase 6 family member A1 [Source:HGNC Symbol;Acc:HGNC:7179]
218698_at		1 x 4	9 q31
210691_s_at		2 x 4	2 q32	calcyclin binding protein pseudogene 2 [Source:HGNC Symbol;Acc:HGNC:45123]
209753_s_at	TMPO	1 x 6	12 q23	thymopoietin [Source:HGNC Symbol;Acc:HGNC:11875]
211080_s_at	NEK2	1 x 3	1 q32	NIMA related kinase 2 [Source:HGNC Symbol;Acc:HGNC:7745]
209406_at	BAG2	1 x 4	6 p12	BCL2 associated athanogene 2 [Source:HGNC Symbol;Acc:HGNC:938]
202415_s_at	HSPBP1	9 x 1	19 q13	HSPA (Hsp70) binding protein 1 [Source:HGNC Symbol;Acc:HGNC:24989]
203214_x_at	CDK1	1 x 1	10 q21	cyclin dependent kinase 1 [Source:HGNC Symbol;Acc:HGNC:1722]
202486_at	AFG3L2	8 x 1	18 p11	AFG3 like matrix AAA peptidase subunit 2 [Source:HGNC Symbol;Acc:HGNC:315]
203612_at	BYSL	3 x 1	6 p21	bystin like [Source:HGNC Symbol;Acc:HGNC:1157]
220587_s_at	MLST8	6 x 2	16 p13	MTOR associated protein, LST8 homolog [Source:HGNC Symbol;Acc:HGNC:24825]
219581_at	TSEN2	7 x 1	3 p25	tRNA splicing endonuclease subunit 2 [Source:HGNC Symbol;Acc:HGNC:28422]
45633_at	GINS3	4 x 1	16 q21	GINS complex subunit 3 [Source:HGNC Symbol;Acc:HGNC:25851]
203210_s_at	RFC5	1 x 3	12 q24	replication factor C subunit 5 [Source:HGNC Symbol;Acc:HGNC:9973]
205598_at	TRAIP	5 x 2	3 p21	TRAF interacting protein [Source:HGNC Symbol;Acc:HGNC:30764]
221096_s_at	TMCO6	8 x 4	5 q31	transmembrane and coiled-coil domains 6 [Source:HGNC Symbol;Acc:HGNC:28814]
204822_at	TTK	1 x 1	6 q14	TTK protein kinase [Source:HGNC Symbol;Acc:HGNC:12401]
219258_at	TIPIN	3 x 1	15 q22	TIMELESS interacting protein [Source:HGNC Symbol;Acc:HGNC:30750]
204247_s_at	CDK5	2 x 5	7 q36	cyclin dependent kinase 5 [Source:HGNC Symbol;Acc:HGNC:1774]
219918_s_at	ASPM	1 x 1	1 q31	abnormal spindle microtubule assembly [Source:HGNC Symbol;Acc:HGNC:19048]
218001_at	MRPS2	4 x 3	9 q34	mitochondrial ribosomal protein S2 [Source:HGNC Symbol;Acc:HGNC:14495]
209837_at	AP4M1	8 x 6	7 q22	adaptor related protein complex 4 mu 1 subunit [Source:HGNC Symbol;Acc:HGNC:574]
203744_at	HMGB3	1 x 1	X q28	high mobility group box 3 [Source:HGNC Symbol;Acc:HGNC:5004]
219978_s_at	NUSAP1	1 x 1	15 q15	nucleolar and spindle associated protein 1 [Source:HGNC Symbol;Acc:HGNC:18538]
204300_at	GATB	7 x 4	4 q31	glutamyl-tRNA amidotransferase subunit B [Source:HGNC Symbol;Acc:HGNC:8849]
219098_at	MYBBP1A	7 x 1	17 p13	MYB binding protein 1a [Source:HGNC Symbol;Acc:HGNC:7546]
203866_at	NLE1	8 x 2	17 q12	notchless homolog 1 [Source:HGNC Symbol;Acc:HGNC:19889]
202691_at	SNRPD1	2 x 3	18 q11	small nuclear ribonucleoprotein D1 polypeptide [Source:HGNC Symbol;Acc:HGNC:11158]
203367_at	DUSP14	6 x 1	17 q12	dual specificity phosphatase 14 [Source:HGNC Symbol;Acc:HGNC:17007]
218314_s_at	C11orf57	9 x 3	11 q23	chromosome 11 open reading frame 57 [Source:HGNC Symbol;Acc:HGNC:25569]
219787_s_at	ECT2	1 x 1	3 q26	epithelial cell transforming 2 [Source:HGNC Symbol;Acc:HGNC:3155]
203061_s_at	MDC1	7 x 6	6 p21	mediator of DNA damage checkpoint 1 [Source:HGNC Symbol;Acc:HGNC:21163]
206961_s_at	MED20	4 x 7	6 p21	mediator complex subunit 20 [Source:HGNC Symbol;Acc:HGNC:16840]
218710_at	TTC27	10 x 2	2 p22	tetratricopeptide repeat domain 27 [Source:HGNC Symbol;Acc:HGNC:25986]
218947_s_at	MTPAP	6 x 4	10 p11	mitochondrial poly(A) polymerase [Source:HGNC Symbol;Acc:HGNC:25532]
219490_s_at	DCLRE1B	1 x 4	1 p13	DNA cross-link repair 1B [Source:HGNC Symbol;Acc:HGNC:17641]
212023_s_at	MKI67	2 x 1	10 q26	marker of proliferation Ki-67 [Source:HGNC Symbol;Acc:HGNC:7107]
210317_s_at	YWHAE	1 x 6	17 p13	tyrosine 3-monooxygenase/tryptophan 5-monooxygenase activation protein epsilon [Source:HGNC Symbol;Acc:HGNC:12851]
218782_s_at	ATAD2	1 x 2	8 q24	ATPase family, AAA domain containing 2 [Source:HGNC Symbol;Acc:HGNC:30123]
205628_at	PRIM2	9 x 3	6 p11	primase (DNA) subunit 2 [Source:HGNC Symbol;Acc:HGNC:9370]
218542_at	CEP55	1 x 1	10 q23	centrosomal protein 55 [Source:HGNC Symbol;Acc:HGNC:1161]
210005_at	GART	7 x 2	21 q22	phosphoribosylglycinamide formyltransferase, phosphoribosylglycinamide synthetase, phosphoribosylaminoimidazole synthetase [Source:HGNC Symbol;Acc:HGNC:4163]
203166_at	CFDP1	9 x 3	16 q23	craniofacial development protein 1 [Source:HGNC Symbol;Acc:HGNC:1873]
205086_s_at	NCAPH2	6 x 1	22 q13	non-SMC condensin II complex subunit H2 [Source:HGNC Symbol;Acc:HGNC:25071]
203176_s_at	TFAM	5 x 3	10 q21	transcription factor A, mitochondrial [Source:HGNC Symbol;Acc:HGNC:11741]
218564_at	RFWD3	3 x 2	16 q23	ring finger and WD repeat domain 3 [Source:HGNC Symbol;Acc:HGNC:25539]
214006_s_at	GGCX	9 x 6	2 p11	gamma-glutamyl carboxylase [Source:HGNC Symbol;Acc:HGNC:4247]
204728_s_at	WDHD1	3 x 1	14 q22	WD repeat and HMG-box DNA binding protein 1 [Source:HGNC Symbol;Acc:HGNC:23170]
209746_s_at	COQ7	8 x 1	16 p12	coenzyme Q7, hydroxylase [Source:HGNC Symbol;Acc:HGNC:2244]
202601_s_at	HTATSF1	4 x 7	X q26	HIV-1 Tat specific factor 1 [Source:HGNC Symbol;Acc:HGNC:5276]
219530_at	PALB2	8 x 3	16 p12	partner and localizer of BRCA2 [Source:HGNC Symbol;Acc:HGNC:26144]
218904_s_at	C9orf40	1 x 3	9 q21	chromosome 9 open reading frame 40 [Source:HGNC Symbol;Acc:HGNC:23433]
213132_s_at	MCAT	3 x 3	22 q13	malonyl-CoA-acyl carrier protein transacylase [Source:HGNC Symbol;Acc:HGNC:29622]
213237_at	KNOP1	4 x 2	16 p12	lysine rich nucleolar protein 1 [Source:HGNC Symbol;Acc:HGNC:34404]
203033_x_at	FH	5 x 2	1 q43	fumarate hydratase [Source:HGNC Symbol;Acc:HGNC:3700]
219000_s_at	DSCC1	4 x 1	8 q24	DNA replication and sister chromatid cohesion 1 [Source:HGNC Symbol;Acc:HGNC:24453]
216952_s_at	LMNB2	4 x 1	19 p13	lamin B2 [Source:HGNC Symbol;Acc:HGNC:6638]
203867_s_at	NLE1	5 x 1	17 q12	notchless homolog 1 [Source:HGNC Symbol;Acc:HGNC:19889]
219539_at	GEMIN6	1 x 3	2 p22	gem nuclear organelle associated protein 6 [Source:HGNC Symbol;Acc:HGNC:20044]
208973_at	ERI3	6 x 4	1 p34	ERI1 exoribonuclease family member 3 [Source:HGNC Symbol;Acc:HGNC:17276]
204147_s_at	TFDP1	1 x 4	13 q34	transcription factor Dp-1 [Source:HGNC Symbol;Acc:HGNC:11749]
213454_at	CENPS	4 x 1	1 p36	centromere protein S [Source:HGNC Symbol;Acc:HGNC:23163]
209433_s_at	PPAT	5 x 1	4 q12	phosphoribosyl pyrophosphate amidotransferase [Source:HGNC Symbol;Acc:HGNC:9238]
205909_at	POLE2	1 x 1	14 q21	DNA polymerase epsilon 2, accessory subunit [Source:HGNC Symbol;Acc:HGNC:9178]
221807_s_at	TRABD	4 x 5	22 q13	TraB domain containing [Source:HGNC Symbol;Acc:HGNC:28805]
212279_at	TMEM97	1 x 1	17 q11	transmembrane protein 97 [Source:HGNC Symbol;Acc:HGNC:28106]
211114_x_at	GEMIN2	3 x 4	14 q21	gem nuclear organelle associated protein 2 [Source:HGNC Symbol;Acc:HGNC:10884]
205284_at	URB2	7 x 1	1 q42	URB2 ribosome biogenesis 2 homolog (S. cerevisiae) [Source:HGNC Symbol;Acc:HGNC:28967]
208264_s_at	EIF3J	7 x 2	15 q21	eukaryotic translation initiation factor 3 subunit J [Source:HGNC Symbol;Acc:HGNC:3270]
202095_s_at	BIRC5	1 x 1	17 q25	baculoviral IAP repeat containing 5 [Source:HGNC Symbol;Acc:HGNC:593]
218455_at	NFS1	9 x 4	20 q11	NFS1, cysteine desulfurase [Source:HGNC Symbol;Acc:HGNC:15910]
52285_f_at	CEP76	4 x 2	18 p11	centrosomal protein 76 [Source:HGNC Symbol;Acc:HGNC:25727]
218267_at		8 x 4
212186_at	ACACA	7 x 1	17 q12	acetyl-CoA carboxylase alpha [Source:HGNC Symbol;Acc:HGNC:84]
218475_at	TRMT2A	6 x 4	22 q11	tRNA methyltransferase 2 homolog A [Source:HGNC Symbol;Acc:HGNC:24974]
203702_s_at	TTLL4	4 x 4	2 q35	tubulin tyrosine ligase like 4 [Source:HGNC Symbol;Acc:HGNC:28976]
202533_s_at		1 x 2	18 q11	dihydrofolate reductase pseudogene 1 [Source:HGNC Symbol;Acc:HGNC:2862]
204768_s_at	FEN1	1 x 2	11 q12	flap structure-specific endonuclease 1 [Source:HGNC Symbol;Acc:HGNC:3650]
212949_at	NCAPH	1 x 1	2 q11	non-SMC condensin I complex subunit H [Source:HGNC Symbol;Acc:HGNC:1112]
211952_at	IPO5	5 x 1	13 q32	importin 5 [Source:HGNC Symbol;Acc:HGNC:6402]
209927_s_at	CHTOP	3 x 6	1 q21	chromatin target of PRMT1 [Source:HGNC Symbol;Acc:HGNC:24511]
212217_at	PREPL	2 x 7	2 p21	prolyl endopeptidase-like [Source:HGNC Symbol;Acc:HGNC:30228]
216232_s_at	GCN1	7 x 2	12 q24	GCN1, eIF2 alpha kinase activator homolog [Source:HGNC Symbol;Acc:HGNC:4199]
219555_s_at	CENPN	1 x 1	16 q23	centromere protein N [Source:HGNC Symbol;Acc:HGNC:30873]
215711_s_at	WEE1	2 x 6	11 p15	WEE1 G2 checkpoint kinase [Source:HGNC Symbol;Acc:HGNC:12761]
218597_s_at	CISD1	3 x 2	10 q21	CDGSH iron sulfur domain 1 [Source:HGNC Symbol;Acc:HGNC:30880]
209704_at	MTF2	6 x 6	1 p22	metal response element binding transcription factor 2 [Source:HGNC Symbol;Acc:HGNC:29535]
208938_at	PRCC	6 x 5	1 q23	papillary renal cell carcinoma (translocation-associated) [Source:HGNC Symbol;Acc:HGNC:9343]
202472_at	MPI	9 x 6	15 q24	mannose phosphate isomerase [Source:HGNC Symbol;Acc:HGNC:7216]
203171_s_at	RRP8	9 x 3	11 p15	ribosomal RNA processing 8, methyltransferase, homolog (yeast) [Source:HGNC Symbol;Acc:HGNC:29030]
33307_at	RRP7A	4 x 1	22 q13	ribosomal RNA processing 7 homolog A [Source:HGNC Symbol;Acc:HGNC:24286]
209336_at	LOC102724159	6 x 2	21 p12
218741_at	CENPM	1 x 1	22 q13	centromere protein M [Source:HGNC Symbol;Acc:HGNC:18352]
220172_at	DCAF17	5 x 6	2 q31	DDB1 and CUL4 associated factor 17 [Source:HGNC Symbol;Acc:HGNC:25784]
218513_at	TMA16	5 x 3	4 q32	translation machinery associated 16 homolog [Source:HGNC Symbol;Acc:HGNC:25638]
203213_at	CDK1	1 x 1	10 q21	cyclin dependent kinase 1 [Source:HGNC Symbol;Acc:HGNC:1722]
221027_s_at	PLA2G12A	5 x 2	4 q25	phospholipase A2 group XIIA [Source:HGNC Symbol;Acc:HGNC:18554]
218073_s_at	NDC1	1 x 3	1 p32	NDC1 transmembrane nucleoporin [Source:HGNC Symbol;Acc:HGNC:25525]
204886_at	PLK4	3 x 1	4 q28	polo like kinase 4 [Source:HGNC Symbol;Acc:HGNC:11397]
214941_s_at	PRPF40A	5 x 7	2 q23	pre-mRNA processing factor 40 homolog A [Source:HGNC Symbol;Acc:HGNC:16463]
221196_x_at	BRCC3	1 x 5	X q28	BRCA1/BRCA2-containing complex subunit 3 [Source:HGNC Symbol;Acc:HGNC:24185]
201979_s_at	PPP5C	2 x 5	19 q13	protein phosphatase 5 catalytic subunit [Source:HGNC Symbol;Acc:HGNC:9322]
218105_s_at	MRPL4	4 x 4	19 p13	mitochondrial ribosomal protein L4 [Source:HGNC Symbol;Acc:HGNC:14276]
214155_s_at	LARP4	3 x 4	12 q13	La ribonucleoprotein domain family member 4 [Source:HGNC Symbol;Acc:HGNC:24320]
207515_s_at	POLR1C	6 x 4	6 p21	RNA polymerase I subunit C [Source:HGNC Symbol;Acc:HGNC:20194]
204318_s_at	GTSE1	1 x 1	22 q13	G2 and S-phase expressed 1 [Source:HGNC Symbol;Acc:HGNC:13698]
221079_s_at	METTL2A	8 x 6	17 q23	methyltransferase like 2A [Source:HGNC Symbol;Acc:HGNC:25755]
203551_s_at	COX11	9 x 3	17 q22	COX11, cytochrome c oxidase copper chaperone [Source:HGNC Symbol;Acc:HGNC:2261]
221987_s_at	TSR1	3 x 3	17 p13	TSR1, ribosome maturation factor [Source:HGNC Symbol;Acc:HGNC:25542]
219022_at	C12orf43	8 x 5	12 q24	chromosome 12 open reading frame 43 [Source:HGNC Symbol;Acc:HGNC:25719]
203976_s_at	CHAF1A	2 x 1	19 p13	chromatin assembly factor 1 subunit A [Source:HGNC Symbol;Acc:HGNC:1910]
219997_s_at	COPS7B	4 x 5	2 q37	COP9 signalosome subunit 7B [Source:HGNC Symbol;Acc:HGNC:16760]
212898_at	TTI1	8 x 1	20 q11	TELO2 interacting protein 1 [Source:HGNC Symbol;Acc:HGNC:29029]
212872_s_at	MED20	11 x 2	6 p21	mediator complex subunit 20 [Source:HGNC Symbol;Acc:HGNC:16840]
203764_at	DLGAP5	1 x 1	14 q22	DLG associated protein 5 [Source:HGNC Symbol;Acc:HGNC:16864]
200783_s_at	STMN1	2 x 1	1 p36	stathmin 1 [Source:HGNC Symbol;Acc:HGNC:6510]
216941_s_at	TAF1B	8 x 4	2 p25	TATA-box binding protein associated factor, RNA polymerase I subunit B [Source:HGNC Symbol;Acc:HGNC:11533]
204649_at	TROAP	2 x 1	12 q13	trophinin associated protein [Source:HGNC Symbol;Acc:HGNC:12327]
205252_at	ZNF174	9 x 6	16 p13	zinc finger protein 174 [Source:HGNC Symbol;Acc:HGNC:12963]
213647_at	DNA2	2 x 1	10 q21	DNA replication helicase/nuclease 2 [Source:HGNC Symbol;Acc:HGNC:2939]
209825_s_at	UCK2	3 x 3	1 q24	uridine-cytidine kinase 2 [Source:HGNC Symbol;Acc:HGNC:12562]
204175_at	ZNF593	5 x 1	1 p36	zinc finger protein 593 [Source:HGNC Symbol;Acc:HGNC:30943]
205687_at	UBFD1	2 x 4	16 p12	ubiquitin family domain containing 1 [Source:HGNC Symbol;Acc:HGNC:30565]
215942_s_at	GTSE1	1 x 1	22 q13	G2 and S-phase expressed 1 [Source:HGNC Symbol;Acc:HGNC:13698]
204267_x_at	PKMYT1	4 x 1	16 p13	protein kinase, membrane associated tyrosine/threonine 1 [Source:HGNC Symbol;Acc:HGNC:29650]
221507_at	TNPO2	7 x 1	19 p13	transportin 2 [Source:HGNC Symbol;Acc:HGNC:19998]
212125_at	RANGAP1	2 x 6	22 q13	Ran GTPase activating protein 1 [Source:HGNC Symbol;Acc:HGNC:9854]
206468_s_at	METTL13	4 x 7	1 q24	methyltransferase like 13 [Source:HGNC Symbol;Acc:HGNC:24248]
212216_at	PREPL	1 x 6	2 p21	prolyl endopeptidase-like [Source:HGNC Symbol;Acc:HGNC:30228]
216251_s_at	TTLL12	6 x 1	22 q13	tubulin tyrosine ligase like 12 [Source:HGNC Symbol;Acc:HGNC:28974]
53968_at	GANAB	10 x 4	11 q12	glucosidase II alpha subunit [Source:HGNC Symbol;Acc:HGNC:4138]
205071_x_at	XRCC4	9 x 6	5 q14	X-ray repair cross complementing 4 [Source:HGNC Symbol;Acc:HGNC:12831]
203782_s_at	POLRMT	8 x 3	19 p13	RNA polymerase mitochondrial [Source:HGNC Symbol;Acc:HGNC:9200]
200988_s_at	PSME3	8 x 6	17 q21	proteasome activator subunit 3 [Source:HGNC Symbol;Acc:HGNC:9570]
218349_s_at	ZWILCH	1 x 2	15 q22	zwilch kinetochore protein [Source:HGNC Symbol;Acc:HGNC:25468]
202470_s_at	CPSF6	8 x 1	12 q15	cleavage and polyadenylation specific factor 6 [Source:HGNC Symbol;Acc:HGNC:13871]
209317_at	POLR1C	7 x 1	6 p21	RNA polymerase I subunit C [Source:HGNC Symbol;Acc:HGNC:20194]
209714_s_at	CDKN3	1 x 1	14 q22	cyclin dependent kinase inhibitor 3 [Source:HGNC Symbol;Acc:HGNC:1791]
209965_s_at	RAD51D	5 x 6	17 q12	RAD51 paralog D [Source:HGNC Symbol;Acc:HGNC:9823]
205677_s_at		7 x 1	13 q14	deleted in lymphocytic leukemia 1 [Source:HGNC Symbol;Acc:HGNC:13747]
219296_at	ZDHHC13	10 x 4	11 p15	zinc finger DHHC-type containing 13 [Source:HGNC Symbol;Acc:HGNC:18413]
206364_at	KIF14	1 x 1	1 q32	kinesin family member 14 [Source:HGNC Symbol;Acc:HGNC:19181]
210050_at	TPI1	10 x 3	12 p13	triosephosphate isomerase 1 [Source:HGNC Symbol;Acc:HGNC:12009]
203209_at	RFC5	2 x 1	12 q24	replication factor C subunit 5 [Source:HGNC Symbol;Acc:HGNC:9973]
215905_s_at	SNRNP40	1 x 4	1 p35	small nuclear ribonucleoprotein U5 subunit 40 [Source:HGNC Symbol;Acc:HGNC:30857]
208939_at	SEPHS1	7 x 1	10 p13	selenophosphate synthetase 1 [Source:HGNC Symbol;Acc:HGNC:19685]
212424_at	PDCD11	7 x 1	10 q24	programmed cell death 11 [Source:HGNC Symbol;Acc:HGNC:13408]
202159_at	FARSA	4 x 1	19 p13	phenylalanyl-tRNA synthetase alpha subunit [Source:HGNC Symbol;Acc:HGNC:3592]
213334_x_at	HAUS7	4 x 2	X q28	HAUS augmin like complex subunit 7 [Source:HGNC Symbol;Acc:HGNC:32979]
209478_at	CENPX	7 x 1	17 q25	centromere protein X [Source:HGNC Symbol;Acc:HGNC:11422]
205981_s_at	ING2	7 x 5	4 q35	inhibitor of growth family member 2 [Source:HGNC Symbol;Acc:HGNC:6063]
220764_at		6 x 7
201036_s_at	HADH	6 x 1	4 q25	hydroxyacyl-CoA dehydrogenase [Source:HGNC Symbol;Acc:HGNC:4799]
218619_s_at	SUV39H1	3 x 1	X p11	suppressor of variegation 3-9 homolog 1 [Source:HGNC Symbol;Acc:HGNC:11479]
218768_at	NUP107	10 x 1	12 q15	nucleoporin 107 [Source:HGNC Symbol;Acc:HGNC:29914]
218882_s_at	WDR3	9 x 1	1 p12	WD repeat domain 3 [Source:HGNC Symbol;Acc:HGNC:12755]
201509_at	IDH3B	8 x 3	20 p13	isocitrate dehydrogenase 3 (NAD(+)) beta [Source:HGNC Symbol;Acc:HGNC:5385]
202338_at	TK1	1 x 1	17 q25	thymidine kinase 1 [Source:HGNC Symbol;Acc:HGNC:11830]
202190_at	CSTF1	4 x 5	20 q13	cleavage stimulation factor subunit 1 [Source:HGNC Symbol;Acc:HGNC:2483]
206499_s_at	RCC1	3 x 1	1 p35	regulator of chromosome condensation 1 [Source:HGNC Symbol;Acc:HGNC:1913]
218799_at	GPN2	2 x 5	1 p36	GPN-loop GTPase 2 [Source:HGNC Symbol;Acc:HGNC:25513]
214700_x_at	RIF1	5 x 5	2 q23	replication timing regulatory factor 1 [Source:HGNC Symbol;Acc:HGNC:23207]
209709_s_at	HMMR	1 x 1	5 q34	hyaluronan mediated motility receptor [Source:HGNC Symbol;Acc:HGNC:5012]
218982_s_at	MRPS17	1 x 2	7 p11	mitochondrial ribosomal protein S17 [Source:HGNC Symbol;Acc:HGNC:14047]
219123_at	ZNF232	10 x 1	17 p13	zinc finger protein 232 [Source:HGNC Symbol;Acc:HGNC:13026]
210779_x_at	GEMIN2	4 x 4	14 q21	gem nuclear organelle associated protein 2 [Source:HGNC Symbol;Acc:HGNC:10884]
202816_s_at	SS18	3 x 7	18 q11	SS18, nBAF chromatin remodeling complex subunit [Source:HGNC Symbol;Acc:HGNC:11340]
219494_at	RAD54B	3 x 1	8 q22	fibrinogen silencer binding protein [Source:HGNC Symbol;Acc:HGNC:43653]
219459_at	POLR3B	8 x 1	12 q23	RNA polymerase III subunit B [Source:HGNC Symbol;Acc:HGNC:30348]
205135_s_at		6 x 1	6 q12	NUFIP1P, FMR1 interacting protein 1 pseudogene [Source:HGNC Symbol;Acc:HGNC:8058]
222029_x_at	PFDN6	3 x 2	6 p21	prefoldin subunit 6 [Source:HGNC Symbol;Acc:HGNC:4926]
221550_at	COX15	3 x 6	10 q24	COX15, cytochrome c oxidase assembly homolog [Source:HGNC Symbol;Acc:HGNC:2263]
203625_x_at	SKP2	5 x 1	5 p13	S-phase kinase associated protein 2 [Source:HGNC Symbol;Acc:HGNC:10901]
218481_at	EXOSC5	4 x 3	19 q13	exosome component 5 [Source:HGNC Symbol;Acc:HGNC:24662]
221436_s_at	CDCA3	1 x 1	12 p13	cell division cycle associated 3 [Source:HGNC Symbol;Acc:HGNC:14624]
214662_at	WDR43	8 x 1	2 p23	WD repeat domain 43 [Source:HGNC Symbol;Acc:HGNC:28945]
212563_at	BOP1	3 x 2	8 q24	block of proliferation 1 [Source:HGNC Symbol;Acc:HGNC:15519]
217782_s_at	GPS1	8 x 5	17 q25	G protein pathway suppressor 1 [Source:HGNC Symbol;Acc:HGNC:4549]
218663_at	NCAPG	1 x 1	4 p15	non-SMC condensin I complex subunit G [Source:HGNC Symbol;Acc:HGNC:24304]
204662_at	CCP110	9 x 1	16 p12	centriolar coiled-coil protein 110 [Source:HGNC Symbol;Acc:HGNC:24342]
207622_s_at	ABCF2	1 x 6	7 q36	ATP binding cassette subfamily F member 2 [Source:HGNC Symbol;Acc:HGNC:71]
213320_at	PRMT3	6 x 1	11 p15	protein arginine methyltransferase 3 [Source:HGNC Symbol;Acc:HGNC:30163]
221685_s_at	SPDL1	1 x 1	5 q35	spindle apparatus coiled-coil protein 1 [Source:HGNC Symbol;Acc:HGNC:26010]
201323_at	EBNA1BP2	3 x 2	1 p34	EBNA1 binding protein 2 [Source:HGNC Symbol;Acc:HGNC:15531]
217427_s_at	HIRA	5 x 4	22 q11	histone cell cycle regulator [Source:HGNC Symbol;Acc:HGNC:4916]
218355_at	KIF4A	1 x 1	X q13	kinesin family member 4A [Source:HGNC Symbol;Acc:HGNC:13339]
205394_at	CHEK1	1 x 1	11 q24	checkpoint kinase 1 [Source:HGNC Symbol;Acc:HGNC:1925]
205078_at	PIGF	1 x 6	2 p21	phosphatidylinositol glycan anchor biosynthesis class F [Source:HGNC Symbol;Acc:HGNC:8962]
214661_s_at	NOP14	7 x 1	4 p16	NOP14 nucleolar protein [Source:HGNC Symbol;Acc:HGNC:16821]
209123_at	QDPR	2 x 5	4 p15	quinoid dihydropteridine reductase [Source:HGNC Symbol;Acc:HGNC:9752]
214437_s_at	SHMT2	4 x 5	12 q13	serine hydroxymethyltransferase 2 [Source:HGNC Symbol;Acc:HGNC:10852]
212141_at	MCM4	3 x 1	8 q11	minichromosome maintenance complex component 4 [Source:HGNC Symbol;Acc:HGNC:6947]
209482_at	POP7	3 x 2	7 q22	POP7 homolog, ribonuclease P/MRP subunit [Source:HGNC Symbol;Acc:HGNC:19949]
221677_s_at	DONSON	1 x 1	21 q22	downstream neighbor of SON [Source:HGNC Symbol;Acc:HGNC:2993]
215714_s_at	SMARCA4	8 x 1	19 p13	SWI/SNF related, matrix associated, actin dependent regulator of chromatin, subfamily a, member 4 [Source:HGNC Symbol;Acc:HGNC:11100]
209817_at	PPP3CB	11 x 1	10 q22	protein phosphatase 3 catalytic subunit beta [Source:HGNC Symbol;Acc:HGNC:9315]
210320_s_at	DDX52	7 x 5	17 q12	DExD-box helicase 52 [Source:HGNC Symbol;Acc:HGNC:20038]
203189_s_at	NDUFS8	1 x 5	11 q13	NADH:ubiquinone oxidoreductase core subunit S8 [Source:HGNC Symbol;Acc:HGNC:7715]
210821_x_at	CENPA	1 x 2	2 p23	centromere protein A [Source:HGNC Symbol;Acc:HGNC:1851]
202726_at	LIG1	3 x 1	19 q13	DNA ligase 1 [Source:HGNC Symbol;Acc:HGNC:6598]
205956_x_at	PSMC3IP	7 x 1	17 q21	PSMC3 interacting protein [Source:HGNC Symbol;Acc:HGNC:17928]
205967_at	HIST1H4C	11 x 1	6 p22	histone cluster 1 H4 family member c [Source:HGNC Symbol;Acc:HGNC:4787]
203086_at	KIF2A	7 x 7	5 q12	kinesin family member 2A [Source:HGNC Symbol;Acc:HGNC:6318]
208941_s_at	SEPHS1	4 x 3	10 p13	selenophosphate synthetase 1 [Source:HGNC Symbol;Acc:HGNC:19685]
216602_s_at	FARSA	1 x 5	19 p13	phenylalanyl-tRNA synthetase alpha subunit [Source:HGNC Symbol;Acc:HGNC:3592]
211575_s_at	UBE3A	7 x 6	15 q11	ubiquitin protein ligase E3A [Source:HGNC Symbol;Acc:HGNC:12496]
203228_at	PAFAH1B3	6 x 1	19 q13	platelet activating factor acetylhydrolase 1b catalytic subunit 3 [Source:HGNC Symbol;Acc:HGNC:8576]
218973_at	EFL1	7 x 6	15 q25	elongation factor like GTPase 1 [Source:HGNC Symbol;Acc:HGNC:25789]
202236_s_at	SLC16A1	1 x 3	1 p13	solute carrier family 16 member 1 [Source:HGNC Symbol;Acc:HGNC:10922]
221521_s_at	GINS2	1 x 1	16 q24	GINS complex subunit 2 [Source:HGNC Symbol;Acc:HGNC:24575]
203960_s_at	HSPB11	1 x 3	1 p32	heat shock protein family B (small) member 11 [Source:HGNC Symbol;Acc:HGNC:25019]
214949_at		7 x 7
206205_at	MPHOSPH9	3 x 4	12 q24	M-phase phosphoprotein 9 [Source:HGNC Symbol;Acc:HGNC:7215]
208002_s_at	ACOT7	1 x 2	1 p36	acyl-CoA thioesterase 7 [Source:HGNC Symbol;Acc:HGNC:24157]
201330_at		1 x 5
203270_at	DTYMK	4 x 1	2 q37	deoxythymidylate kinase [Source:HGNC Symbol;Acc:HGNC:3061]
208368_s_at	BRCA2	8 x 1	13 q13	BRCA2, DNA repair associated [Source:HGNC Symbol;Acc:HGNC:1101]
222192_s_at	LDAH	5 x 6	2 p24	lipid droplet associated hydrolase [Source:HGNC Symbol;Acc:HGNC:26145]
213008_at	FANCI	1 x 1	15 q26	Fanconi anemia complementation group I [Source:HGNC Symbol;Acc:HGNC:25568]
222039_at	KIF18B	1 x 1	17 q21	kinesin family member 18B [Source:HGNC Symbol;Acc:HGNC:27102]
219124_at	TTI2	10 x 4	8 p12	TELO2 interacting protein 2 [Source:HGNC Symbol;Acc:HGNC:26262]
208744_x_at	HSPH1	1 x 6	13 q12	heat shock protein family H (Hsp110) member 1 [Source:HGNC Symbol;Acc:HGNC:16969]
202139_at	AKR7A2	2 x 7	1 p36	aldo-keto reductase family 7 member A2 [Source:HGNC Symbol;Acc:HGNC:389]
212603_at	MRPS31	11 x 1	13 q14	mitochondrial ribosomal protein S31 [Source:HGNC Symbol;Acc:HGNC:16632]
212020_s_at	MKI67	1 x 1	10 q26	marker of proliferation Ki-67 [Source:HGNC Symbol;Acc:HGNC:7107]
201291_s_at	TOP2A	1 x 1	17 q21	topoisomerase (DNA) II alpha [Source:HGNC Symbol;Acc:HGNC:11989]
214507_s_at	EXOSC2	4 x 4	9 q34	exosome component 2 [Source:HGNC Symbol;Acc:HGNC:17097]
209085_x_at	RFC1	7 x 7	4 p14	replication factor C subunit 1 [Source:HGNC Symbol;Acc:HGNC:9969]
219146_at	TEFM	1 x 5	17 q11	transcription elongation factor, mitochondrial [Source:HGNC Symbol;Acc:HGNC:26223]
219200_at	FASTKD3	9 x 4	5 p15	FAST kinase domains 3 [Source:HGNC Symbol;Acc:HGNC:28758]
202170_s_at	AASDHPPT	4 x 6	11 q22	aminoadipate-semialdehyde dehydrogenase-phosphopantetheinyl transferase [Source:HGNC Symbol;Acc:HGNC:14235]
203714_s_at	TBCE	10 x 3	1 q42	tubulin folding cofactor E [Source:HGNC Symbol;Acc:HGNC:11582]
219347_at	NUDT15	6 x 1	13 q14	nudix hydrolase 15 [Source:HGNC Symbol;Acc:HGNC:23063]
219037_at	RRP15	10 x 3	1 q41	ribosomal RNA processing 15 homolog [Source:HGNC Symbol;Acc:HGNC:24255]
213302_at	PFAS	5 x 1	17 p13	phosphoribosylformylglycinamidine synthase [Source:HGNC Symbol;Acc:HGNC:8863]
218593_at	RBM28	3 x 2	7 q32	RNA binding motif protein 28 [Source:HGNC Symbol;Acc:HGNC:21863]
201035_s_at	HADH	5 x 1	4 q25	hydroxyacyl-CoA dehydrogenase [Source:HGNC Symbol;Acc:HGNC:4799]
218264_at	BCCIP	9 x 1	10 q26	BRCA2 and CDKN1A interacting protein [Source:HGNC Symbol;Acc:HGNC:978]
200995_at	IPO7	10 x 1	11 p15	importin 7 [Source:HGNC Symbol;Acc:HGNC:9852]
218719_s_at	GINS3	3 x 1	16 q21	GINS complex subunit 3 [Source:HGNC Symbol;Acc:HGNC:25851]
204887_s_at	PLK4	1 x 1	4 q28	polo like kinase 4 [Source:HGNC Symbol;Acc:HGNC:11397]
202904_s_at	LSM5	8 x 1	7 p14	LSM5 homolog, U6 small nuclear RNA and mRNA degradation associated [Source:HGNC Symbol;Acc:HGNC:17162]
203022_at	RNASEH2A	1 x 1	19 p13	ribonuclease H2 subunit A [Source:HGNC Symbol;Acc:HGNC:18518]
217973_at	DCXR	9 x 5	17 q25	dicarbonyl and L-xylulose reductase [Source:HGNC Symbol;Acc:HGNC:18985]
209680_s_at	KIFC1	1 x 1	6 p21	kinesin family member C1 [Source:HGNC Symbol;Acc:HGNC:6389]
210154_at	ME2	1 x 6	18 q21	malic enzyme 2 [Source:HGNC Symbol;Acc:HGNC:6984]
218755_at	KIF20A	1 x 1	5 q31	kinesin family member 20A [Source:HGNC Symbol;Acc:HGNC:9787]
31807_at	DDX49	7 x 1	19 p13	DEAD-box helicase 49 [Source:HGNC Symbol;Acc:HGNC:18684]
205339_at	STIL	3 x 1	1 p33	SCL/TAL1 interrupting locus [Source:HGNC Symbol;Acc:HGNC:10879]
202586_at	POLR2L	10 x 4	11 p15	RNA polymerase II subunit L [Source:HGNC Symbol;Acc:HGNC:9199]
204799_at	ZBED4	6 x 4	22 q13	zinc finger BED-type containing 4 [Source:HGNC Symbol;Acc:HGNC:20721]
204977_at	DDX10	7 x 2	11 q22	DEAD-box helicase 10 [Source:HGNC Symbol;Acc:HGNC:2735]
209408_at	KIF2C	1 x 1	1 p34	kinesin family member 2C [Source:HGNC Symbol;Acc:HGNC:6393]
212604_at	MRPS31	11 x 1	13 q14	mitochondrial ribosomal protein S31 [Source:HGNC Symbol;Acc:HGNC:16632]
216026_s_at	POLE	7 x 1	12 q24	DNA polymerase epsilon, catalytic subunit [Source:HGNC Symbol;Acc:HGNC:9177]
215780_s_at	SET	6 x 6	9 q34	SET nuclear proto-oncogene [Source:HGNC Symbol;Acc:HGNC:10760]
203972_s_at	PEX3	1 x 6	6 q24	peroxisomal biogenesis factor 3 [Source:HGNC Symbol;Acc:HGNC:8858]
203737_s_at	PPRC1	7 x 1	10 q24	peroxisome proliferator-activated receptor gamma, coactivator-related 1 [Source:HGNC Symbol;Acc:HGNC:30025]
202049_s_at	ZMYM4	1 x 6	1 p34	zinc finger MYM-type containing 4 [Source:HGNC Symbol;Acc:HGNC:13055]
213226_at	CCNA2	1 x 1	4 q27	cyclin A2 [Source:HGNC Symbol;Acc:HGNC:1578]
204444_at	KIF11	1 x 1	10 q23	kinesin family member 11 [Source:HGNC Symbol;Acc:HGNC:6388]
218605_at	TFB2M	6 x 5	1 q44	transcription factor B2, mitochondrial [Source:HGNC Symbol;Acc:HGNC:18559]
213092_x_at	DNAJC9	3 x 1	10 q22	DnaJ heat shock protein family (Hsp40) member C9 [Source:HGNC Symbol;Acc:HGNC:19123]
214794_at	PA2G4	4 x 3	12 q13	proliferation-associated 2G4 [Source:HGNC Symbol;Acc:HGNC:8550]
206102_at	GINS1	1 x 1	20 p11	GINS complex subunit 1 [Source:HGNC Symbol;Acc:HGNC:28980]
211569_s_at	HADH	6 x 1	4 q25	hydroxyacyl-CoA dehydrogenase [Source:HGNC Symbol;Acc:HGNC:4799]
218006_s_at	ZNF22	6 x 7	10 q11	zinc finger protein 22 [Source:HGNC Symbol;Acc:HGNC:13012]
205235_s_at	KIF20B	5 x 1	10 q23	kinesin family member 20B [Source:HGNC Symbol;Acc:HGNC:7212]
219076_s_at		4 x 1	12 q24
218305_at		6 x 1	14 q12
202412_s_at	USP1	8 x 1	1 p31	ubiquitin specific peptidase 1 [Source:HGNC Symbol;Acc:HGNC:12607]
210502_s_at	PPIE	2 x 6	1 p34	peptidylprolyl isomerase E [Source:HGNC Symbol;Acc:HGNC:9258]
218115_at	ASF1B	1 x 1	19 p13	anti-silencing function 1B histone chaperone [Source:HGNC Symbol;Acc:HGNC:20996]
201764_at	TMEM106C	1 x 2	12 q13	transmembrane protein 106C [Source:HGNC Symbol;Acc:HGNC:28775]
222011_s_at	TCP1	8 x 1	6 q25	t-complex 1 [Source:HGNC Symbol;Acc:HGNC:11655]
203785_s_at	DDX28	8 x 4	16 q22	DEAD-box helicase 28 [Source:HGNC Symbol;Acc:HGNC:17330]
201912_s_at	GSPT1	6 x 6	16 p13	G1 to S phase transition 1 [Source:HGNC Symbol;Acc:HGNC:4621]
201710_at	MYBL2	2 x 1	20 q13	MYB proto-oncogene like 2 [Source:HGNC Symbol;Acc:HGNC:7548]
203664_s_at		6 x 1	2 q14
217960_s_at	TOMM22	1 x 6	22 q13	translocase of outer mitochondrial membrane 22 [Source:HGNC Symbol;Acc:HGNC:18002]
208103_s_at	ANP32E	3 x 1	1 q21	acidic nuclear phosphoprotein 32 family member E [Source:HGNC Symbol;Acc:HGNC:16673]
219192_at	UBAP2	8 x 1	9 p13	ubiquitin associated protein 2 [Source:HGNC Symbol;Acc:HGNC:14185]
204127_at	RFC3	1 x 1	13 q13	replication factor C subunit 3 [Source:HGNC Symbol;Acc:HGNC:9971]
219004_s_at	MIS18A	3 x 1	21 q22	MIS18 kinetochore protein A [Source:HGNC Symbol;Acc:HGNC:1286]
213253_at	SMC2	1 x 1	9 q31	structural maintenance of chromosomes 2 [Source:HGNC Symbol;Acc:HGNC:14011]
218558_s_at	MRPL39	1 x 4	21 q21	mitochondrial ribosomal protein L39 [Source:HGNC Symbol;Acc:HGNC:14027]
202397_at	NUTF2	4 x 3	16 q22	nuclear transport factor 2 [Source:HGNC Symbol;Acc:HGNC:13722]
212694_s_at	PCCB	3 x 4	3 q22	propionyl-CoA carboxylase beta subunit [Source:HGNC Symbol;Acc:HGNC:8654]
202779_s_at		3 x 3	17 p11	ubiquitin conjugating enzyme E2 S pseudogene 2 [Source:HGNC Symbol;Acc:HGNC:32196]
204962_s_at	CENPA	1 x 1	2 p23	centromere protein A [Source:HGNC Symbol;Acc:HGNC:1851]
205063_at	GEMIN2	6 x 1	14 q21	gem nuclear organelle associated protein 2 [Source:HGNC Symbol;Acc:HGNC:10884]
213007_at	FANCI	1 x 1	15 q26	Fanconi anemia complementation group I [Source:HGNC Symbol;Acc:HGNC:25568]
216212_s_at	DKC1	6 x 1	X q28	dyskerin pseudouridine synthase 1 [Source:HGNC Symbol;Acc:HGNC:2890]
221777_at	RITA1	4 x 4	12 q24	RBPJ interacting and tubulin associated 1 [Source:HGNC Symbol;Acc:HGNC:25925]
204146_at	RAD51AP1	1 x 1	12 p13	RAD51 associated protein 1 [Source:HGNC Symbol;Acc:HGNC:16956]
212021_s_at	MKI67	1 x 1	10 q26	marker of proliferation Ki-67 [Source:HGNC Symbol;Acc:HGNC:7107]
219122_s_at	THG1L	10 x 1	5 q33	tRNA-histidine guanylyltransferase 1 like [Source:HGNC Symbol;Acc:HGNC:26053]
211042_x_at	SKP2	7 x 1	5 p13	S-phase kinase associated protein 2 [Source:HGNC Symbol;Acc:HGNC:10901]
212621_at	NEMP1	10 x 1	12 q13	nuclear envelope integral membrane protein 1 [Source:HGNC Symbol;Acc:HGNC:29001]
218188_s_at	LMNB2	5 x 1	19 p13	lamin B2 [Source:HGNC Symbol;Acc:HGNC:6638]
204162_at	NDC80	1 x 1	18 p11	NDC80, kinetochore complex component [Source:HGNC Symbol;Acc:HGNC:16909]
218726_at	HJURP	2 x 1	2 q37	Holliday junction recognition protein [Source:HGNC Symbol;Acc:HGNC:25444]
218722_s_at	CCDC51	3 x 2	3 p21	coiled-coil domain containing 51 [Source:HGNC Symbol;Acc:HGNC:25714]
219493_at	SHCBP1	1 x 1	16 q11	SHC binding and spindle associated 1 [Source:HGNC Symbol;Acc:HGNC:29547]
209715_at	CBX5	3 x 1	12 q13	chromobox 5 [Source:HGNC Symbol;Acc:HGNC:1555]
221770_at	RPE	1 x 5	2 q34	ribulose-5-phosphate-3-epimerase [Source:HGNC Symbol;Acc:HGNC:10293]
202578_s_at	DDX19A	3 x 7	16 q22	DEAD-box helicase 19A [Source:HGNC Symbol;Acc:HGNC:25628]
203405_at	PSMG1	1 x 3	21 q22	proteasome assembly chaperone 1 [Source:HGNC Symbol;Acc:HGNC:3043]
221020_s_at	SLC25A32	7 x 6	8 q22	solute carrier family 25 member 32 [Source:HGNC Symbol;Acc:HGNC:29683]
207740_s_at	NUP62	1 x 6	19 q13	nucleoporin 62 [Source:HGNC Symbol;Acc:HGNC:8066]
203598_s_at	WBP4	9 x 5	13 q14	WW domain binding protein 4 [Source:HGNC Symbol;Acc:HGNC:12739]
211519_s_at	KIF2C	1 x 1	1 p34	kinesin family member 2C [Source:HGNC Symbol;Acc:HGNC:6393]
218883_s_at	CENPU	1 x 1	4 q35	centromere protein U [Source:HGNC Symbol;Acc:HGNC:21348]
204218_at	ANAPC15	10 x 1	11 q13	anaphase promoting complex subunit 15 [Source:HGNC Symbol;Acc:HGNC:24531]
209127_s_at	SART3	4 x 7	12 q23	squamous cell carcinoma antigen recognized by T-cells 3 [Source:HGNC Symbol;Acc:HGNC:16860]
203696_s_at	RFC2	1 x 4	7 q11	replication factor C subunit 2 [Source:HGNC Symbol;Acc:HGNC:9970]
208694_at	PRKDC	11 x 1	8 q11	protein kinase, DNA-activated, catalytic polypeptide [Source:HGNC Symbol;Acc:HGNC:9413]
212422_at	PDCD11	5 x 2	10 q24	programmed cell death 11 [Source:HGNC Symbol;Acc:HGNC:13408]
219166_at	DNAAF2	8 x 4	14 q21	dynein axonemal assembly factor 2 [Source:HGNC Symbol;Acc:HGNC:20188]
201025_at	EIF5B	9 x 1	2 q11	eukaryotic translation initiation factor 5B [Source:HGNC Symbol;Acc:HGNC:30793]
201747_s_at	SAFB	6 x 7	19 p13	scaffold attachment factor B [Source:HGNC Symbol;Acc:HGNC:10520]
205296_at	RBL1	9 x 1	20 q11	RB transcriptional corepressor like 1 [Source:HGNC Symbol;Acc:HGNC:9893]
210052_s_at	TPX2	1 x 1	20 q11	TPX2, microtubule nucleation factor [Source:HGNC Symbol;Acc:HGNC:1249]
202870_s_at	CDC20	1 x 1	1 p34	cell division cycle 20 [Source:HGNC Symbol;Acc:HGNC:1723]
203360_s_at		1 x 4	1 p34
204460_s_at	RAD1	3 x 5	5 p13	RAD1 checkpoint DNA exonuclease [Source:HGNC Symbol;Acc:HGNC:9806]
200875_s_at	NOP56	7 x 1	20 p13	NOP56 ribonucleoprotein [Source:HGNC Symbol;Acc:HGNC:15911]
201897_s_at		1 x 2	10 p11	CDC28 protein kinase regulatory subunit 1B pseudogene 2 [Source:HGNC Symbol;Acc:HGNC:24232]
222010_at	TCP1	8 x 1	6 q25	t-complex 1 [Source:HGNC Symbol;Acc:HGNC:11655]
201043_s_at	ANP32A	5 x 6	15 q23	acidic nuclear phosphoprotein 32 family member A [Source:HGNC Symbol;Acc:HGNC:13233]
205996_s_at	AK2	5 x 7	1 p35	adenylate kinase 2 [Source:HGNC Symbol;Acc:HGNC:362]
34764_at	LARS2	10 x 2	3 p21	leucyl-tRNA synthetase 2, mitochondrial [Source:HGNC Symbol;Acc:HGNC:17095]
218080_x_at	FAF1	8 x 5	1 p32	Fas associated factor 1 [Source:HGNC Symbol;Acc:HGNC:3578]
202872_at	ATP6V1C1	1 x 6	8 q22	ATPase H+ transporting V1 subunit C1 [Source:HGNC Symbol;Acc:HGNC:856]
202532_s_at	DHFR	5 x 1	5 q14	dihydrofolate reductase [Source:HGNC Symbol;Acc:HGNC:2861]
207618_s_at	BCS1L	6 x 3	2 q35	BCS1 homolog, ubiquinol-cytochrome c reductase complex chaperone [Source:HGNC Symbol;Acc:HGNC:1020]
219120_at	WDCP	10 x 1	2 p23	WD repeat and coiled coil containing [Source:HGNC Symbol;Acc:HGNC:26157]
219303_at	RNF219	9 x 4	13 q31	ring finger protein 219 [Source:HGNC Symbol;Acc:HGNC:20308]
203347_s_at	MTF2	7 x 7	1 p22	metal response element binding transcription factor 2 [Source:HGNC Symbol;Acc:HGNC:29535]
209247_s_at	ABCF2	1 x 5	7 q36	ATP binding cassette subfamily F member 2 [Source:HGNC Symbol;Acc:HGNC:71]
203465_at	MRPL19	11 x 2	2 p12	mitochondrial ribosomal protein L19 [Source:HGNC Symbol;Acc:HGNC:14052]
41160_at	MBD3	8 x 1	19 p13	methyl-CpG binding domain protein 3 [Source:HGNC Symbol;Acc:HGNC:6918]
209520_s_at	NCBP1	1 x 5	9 q22	nuclear cap binding protein subunit 1 [Source:HGNC Symbol;Acc:HGNC:7658]
209642_at	BUB1	1 x 1	2 q13	BUB1 mitotic checkpoint serine/threonine kinase [Source:HGNC Symbol;Acc:HGNC:1148]
206451_at	TBCCD1	9 x 4	3 q27	TBCC domain containing 1 [Source:HGNC Symbol;Acc:HGNC:25546]
208907_s_at	MRPS18B	4 x 6	6 p21	mitochondrial ribosomal protein S18B [Source:HGNC Symbol;Acc:HGNC:14516]
211955_at	IPO5	5 x 4	13 q32	importin 5 [Source:HGNC Symbol;Acc:HGNC:6402]
48808_at	DHFR	11 x 1	5 q14	dihydrofolate reductase [Source:HGNC Symbol;Acc:HGNC:2861]
213043_s_at	MED24	7 x 4	17 q21	mediator complex subunit 24 [Source:HGNC Symbol;Acc:HGNC:22963]
201755_at	MCM5	4 x 4	22 q12	minichromosome maintenance complex component 5 [Source:HGNC Symbol;Acc:HGNC:6948]
221520_s_at	CDCA8	1 x 1	1 p34	cell division cycle associated 8 [Source:HGNC Symbol;Acc:HGNC:14629]
218129_s_at	NFYB	2 x 7	12 q23	nuclear transcription factor Y subunit beta [Source:HGNC Symbol;Acc:HGNC:7805]
212597_s_at	HMGXB4	9 x 3	22 q12	HMG-box containing 4 [Source:HGNC Symbol;Acc:HGNC:5003]
221265_s_at	VWA9	8 x 5	15 q22	integrator complex subunit 14 [Source:HGNC Symbol;Acc:HGNC:25372]
218009_s_at	PRC1	1 x 1	15 q26	protein regulator of cytokinesis 1 [Source:HGNC Symbol;Acc:HGNC:9341]
205356_at	USP13	6 x 1	3 q26	ubiquitin specific peptidase 13 (isopeptidase T-3) [Source:HGNC Symbol;Acc:HGNC:12611]
217980_s_at	MRPL16	9 x 2	11 q12	mitochondrial ribosomal protein L16 [Source:HGNC Symbol;Acc:HGNC:14476]
201229_s_at	ARIH2	8 x 3	3 p21	ariadne RBR E3 ubiquitin protein ligase 2 [Source:HGNC Symbol;Acc:HGNC:690]
216532_x_at		1 x 5	6 p25	glutaredoxin 3 pseudogene 2 [Source:HGNC Symbol;Acc:HGNC:49788]
212892_at	ZNF282	8 x 5	7 q36	zinc finger protein 282 [Source:HGNC Symbol;Acc:HGNC:13076]
218049_s_at	MRPL13	1 x 4	8 q24	mitochondrial ribosomal protein L13 [Source:HGNC Symbol;Acc:HGNC:14278]
221940_at	RPUSD2	8 x 3	15 q15	RNA pseudouridylate synthase domain containing 2 [Source:HGNC Symbol;Acc:HGNC:24180]
204616_at		4 x 4	13 q22
210947_s_at	MSH3	7 x 7	5 q14	mutS homolog 3 [Source:HGNC Symbol;Acc:HGNC:7326]
219008_at	LDAH	9 x 5	2 p24	lipid droplet associated hydrolase [Source:HGNC Symbol;Acc:HGNC:26145]
201614_s_at	RUVBL1	4 x 4	3 q21	RuvB like AAA ATPase 1 [Source:HGNC Symbol;Acc:HGNC:10474]
201774_s_at	NCAPD2	1 x 2	12 p13	non-SMC condensin I complex subunit D2 [Source:HGNC Symbol;Acc:HGNC:24305]
205704_s_at	ATP6V0A2	6 x 7	12 q24	ATPase H+ transporting V0 subunit a2 [Source:HGNC Symbol;Acc:HGNC:18481]
202954_at	UBE2C	1 x 1	20 q13	ubiquitin conjugating enzyme E2 C [Source:HGNC Symbol;Acc:HGNC:15937]
204170_s_at	CKS2	1 x 1	9 q22	CDC28 protein kinase regulatory subunit 2 [Source:HGNC Symbol;Acc:HGNC:2000]
202453_s_at	GTF2H1	4 x 7	11 p15	general transcription factor IIH subunit 1 [Source:HGNC Symbol;Acc:HGNC:4655]
217099_s_at	GEMIN4	4 x 5	17 p13	gem nuclear organelle associated protein 4 [Source:HGNC Symbol;Acc:HGNC:15717]
201476_s_at	RRM1	1 x 5	11 p15	ribonucleotide reductase catalytic subunit M1 [Source:HGNC Symbol;Acc:HGNC:10451]
219979_s_at	HIKESHI	4 x 6	11 q14	Hikeshi, heat shock protein nuclear import factor [Source:HGNC Symbol;Acc:HGNC:26938]
205129_at	NPM3	4 x 1	10 q24	nucleophosmin/nucleoplasmin 3 [Source:HGNC Symbol;Acc:HGNC:7931]
204767_s_at	FEN1	1 x 1	11 q12	flap structure-specific endonuclease 1 [Source:HGNC Symbol;Acc:HGNC:3650]
200987_x_at	PSME3	1 x 6	17 q21	proteasome activator subunit 3 [Source:HGNC Symbol;Acc:HGNC:9570]
208079_s_at	AURKA	1 x 1	20 q13	aurora kinase A [Source:HGNC Symbol;Acc:HGNC:11393]
219588_s_at	NCAPG2	1 x 1	7 q36	non-SMC condensin II complex subunit G2 [Source:HGNC Symbol;Acc:HGNC:21904]
210766_s_at	CSE1L	6 x 1	20 q13	chromosome segregation 1 like [Source:HGNC Symbol;Acc:HGNC:2431]
216969_s_at	KIF22	3 x 7	16 p11	kinesin family member 22 [Source:HGNC Symbol;Acc:HGNC:6391]
218757_s_at	UPF3B	11 x 1	X q24	UPF3 regulator of nonsense transcripts homolog B (yeast) [Source:HGNC Symbol;Acc:HGNC:20439]
203432_at	TMPO	11 x 1	12 q23	thymopoietin [Source:HGNC Symbol;Acc:HGNC:11875]
203362_s_at	MAD2L1	1 x 1	4 q27	MAD2 mitotic arrest deficient-like 1 (yeast) [Source:HGNC Symbol;Acc:HGNC:6763]
201714_at	TUBG1	1 x 1	17 q21	tubulin gamma 1 [Source:HGNC Symbol;Acc:HGNC:12417]
203755_at	BUB1B	1 x 1	15 q15	BUB1 mitotic checkpoint serine/threonine kinase B [Source:HGNC Symbol;Acc:HGNC:1149]
204441_s_at	POLA2	1 x 1	11 q13	DNA polymerase alpha 2, accessory subunit [Source:HGNC Symbol;Acc:HGNC:30073]
209773_s_at	RRM2	1 x 1	2 p25	ribonucleotide reductase regulatory subunit M2 [Source:HGNC Symbol;Acc:HGNC:10452]
210983_s_at	MCM7	4 x 4	7 q22	minichromosome maintenance complex component 7 [Source:HGNC Symbol;Acc:HGNC:6950]
203418_at	CCNA2	1 x 1	4 q27	cyclin A2 [Source:HGNC Symbol;Acc:HGNC:1578]
205512_s_at	AIFM1	2 x 5	X q26	apoptosis inducing factor mitochondria associated 1 [Source:HGNC Symbol;Acc:HGNC:8768]
203856_at	VRK1	10 x 1	14 q32	vaccinia related kinase 1 [Source:HGNC Symbol;Acc:HGNC:12718]
218156_s_at	TSR1	2 x 5	17 p13	TSR1, ribosome maturation factor [Source:HGNC Symbol;Acc:HGNC:25542]
205527_s_at	GEMIN4	8 x 1	17 p13	gem nuclear organelle associated protein 4 [Source:HGNC Symbol;Acc:HGNC:15717]
1053_at	RFC2	4 x 4	7 q11	replication factor C subunit 2 [Source:HGNC Symbol;Acc:HGNC:9970]
205770_at	GSR	5 x 7	8 p12	glutathione-disulfide reductase [Source:HGNC Symbol;Acc:HGNC:4623]
221693_s_at	MRPS18A	4 x 6	6 p21	mitochondrial ribosomal protein S18A [Source:HGNC Symbol;Acc:HGNC:14515]
38158_at	ESPL1	1 x 1	12 q13	extra spindle pole bodies like 1, separase [Source:HGNC Symbol;Acc:HGNC:16856]
200903_s_at	AHCY	6 x 1	20 q11	adenosylhomocysteinase [Source:HGNC Symbol;Acc:HGNC:343]
210802_s_at	DIMT1	4 x 6	5 q12	DIM1 dimethyladenosine transferase 1 homolog [Source:HGNC Symbol;Acc:HGNC:30217]
218979_at	RMI1	1 x 1	9 q21	RecQ mediated genome instability 1 [Source:HGNC Symbol;Acc:HGNC:25764]
208839_s_at	CAND1	2 x 4	12 q14	cullin associated and neddylation dissociated 1 [Source:HGNC Symbol;Acc:HGNC:30688]
204240_s_at	SMC2	1 x 1	9 q31	structural maintenance of chromosomes 2 [Source:HGNC Symbol;Acc:HGNC:14011]
216508_x_at		10 x 1	2 q31	high mobility group box 1 pseudogene 4 [Source:HGNC Symbol;Acc:HGNC:4996]
202069_s_at	IDH3A	1 x 5	15 q25	isocitrate dehydrogenase 3 (NAD(+)) alpha [Source:HGNC Symbol;Acc:HGNC:5384]
212836_at	POLD3	2 x 1	11 q13	DNA polymerase delta 3, accessory subunit [Source:HGNC Symbol;Acc:HGNC:20932]
204825_at	MELK	1 x 1	9 p13	maternal embryonic leucine zipper kinase [Source:HGNC Symbol;Acc:HGNC:16870]
201890_at	RRM2	1 x 1	2 p25	ribonucleotide reductase regulatory subunit M2 [Source:HGNC Symbol;Acc:HGNC:10452]
205024_s_at	RAD51	2 x 1	15 q15	RAD51 recombinase [Source:HGNC Symbol;Acc:HGNC:9817]
214710_s_at	CCNB1	1 x 1	5 q13	cyclin B1 [Source:HGNC Symbol;Acc:HGNC:1579]
204331_s_at	MRPS12	3 x 5	19 q13	mitochondrial ribosomal protein S12 [Source:HGNC Symbol;Acc:HGNC:10380]
219819_s_at		1 x 4	8 q21
218112_at	MRPS34	9 x 2	16 p13	mitochondrial ribosomal protein S34 [Source:HGNC Symbol;Acc:HGNC:16618]
202715_at	CAD	6 x 1	2 p23	carbamoyl-phosphate synthetase 2, aspartate transcarbamylase, and dihydroorotase [Source:HGNC Symbol;Acc:HGNC:1424]
205895_s_at	NOLC1	4 x 5	10 q24	nucleolar and coiled-body phosphoprotein 1 [Source:HGNC Symbol;Acc:HGNC:15608]
222036_s_at	MCM4	1 x 1	8 q11	minichromosome maintenance complex component 4 [Source:HGNC Symbol;Acc:HGNC:6947]
203931_s_at		3 x 3	17 q25
204593_s_at	MIEF1	7 x 6	22 q13	mitochondrial elongation factor 1 [Source:HGNC Symbol;Acc:HGNC:25979]
208445_s_at	BAZ1B	11 x 1	7 q11	bromodomain adjacent to zinc finger domain 1B [Source:HGNC Symbol;Acc:HGNC:961]
205324_s_at	FTSJ1	8 x 7	X p11	FtsJ RNA methyltransferase homolog 1 (E. coli) [Source:HGNC Symbol;Acc:HGNC:13254]
204026_s_at	ZWINT	1 x 1	10 q21	ZW10 interacting kinetochore protein [Source:HGNC Symbol;Acc:HGNC:13195]
204092_s_at	AURKA	1 x 1	20 q13	aurora kinase A [Source:HGNC Symbol;Acc:HGNC:11393]
220688_s_at	MRTO4	6 x 1	1 p36	MRT4 homolog, ribosome maturation factor [Source:HGNC Symbol;Acc:HGNC:18477]
212432_at	GRPEL1	5 x 5	4 p16	GrpE like 1, mitochondrial [Source:HGNC Symbol;Acc:HGNC:19696]
210216_x_at	RAD1	10 x 4	5 p13	RAD1 checkpoint DNA exonuclease [Source:HGNC Symbol;Acc:HGNC:9806]
218014_at	NUP85	9 x 1	17 q25	nucleoporin 85 [Source:HGNC Symbol;Acc:HGNC:8734]
212075_s_at	CSNK2A3	4 x 7	11 p15	casein kinase 2 alpha 3 [Source:HGNC Symbol;Acc:HGNC:2458]
207939_x_at	RNPS1	9 x 1	16 p13	RNA binding protein with serine rich domain 1 [Source:HGNC Symbol;Acc:HGNC:10080]
204868_at	MRPL58	10 x 4	17 q25	mitochondrial ribosomal protein L58 [Source:HGNC Symbol;Acc:HGNC:5359]
203039_s_at	NDUFS1	7 x 4	2 q33	NADH:ubiquinone oxidoreductase core subunit S1 [Source:HGNC Symbol;Acc:HGNC:7707]
202589_at	TYMS	1 x 1	18 p11	thymidylate synthetase [Source:HGNC Symbol;Acc:HGNC:12441]
203177_x_at	TFAM	9 x 2	10 q21	transcription factor A, mitochondrial [Source:HGNC Symbol;Acc:HGNC:11741]
201037_at	PFKP	3 x 5	10 p15	phosphofructokinase, platelet [Source:HGNC Symbol;Acc:HGNC:8878]
209175_at	SEC23IP	1 x 6	10 q26	SEC23 interacting protein [Source:HGNC Symbol;Acc:HGNC:17018]
218350_s_at	GMNN	1 x 1	6 p22	geminin, DNA replication inhibitor [Source:HGNC Symbol;Acc:HGNC:17493]
202483_s_at	RANBP1	5 x 3	22 q11	RAN binding protein 1 [Source:HGNC Symbol;Acc:HGNC:9847]
207165_at	HMMR	1 x 1	5 q34	hyaluronan mediated motility receptor [Source:HGNC Symbol;Acc:HGNC:5012]
212022_s_at	MKI67	1 x 1	10 q26	marker of proliferation Ki-67 [Source:HGNC Symbol;Acc:HGNC:7107]
209464_at	AURKB	1 x 1	17 p13	aurora kinase B [Source:HGNC Symbol;Acc:HGNC:11390]
218235_s_at	UTP11	5 x 4	1 p34	UTP11, small subunit processome component homolog (S. cerevisiae) [Source:HGNC Symbol;Acc:HGNC:24329]
214011_s_at	NOP16	6 x 2	5 q35	NOP16 nucleolar protein [Source:HGNC Symbol;Acc:HGNC:26934]
202892_at	CDC23	9 x 4	5 q31	cell division cycle 23 [Source:HGNC Symbol;Acc:HGNC:1724]
217786_at	PRMT5	4 x 5	14 q11	protein arginine methyltransferase 5 [Source:HGNC Symbol;Acc:HGNC:10894]
201014_s_at	PAICS	2 x 3	4 q12	phosphoribosylaminoimidazole carboxylase and phosphoribosylaminoimidazolesuccinocarboxamide synthase [Source:HGNC Symbol;Acc:HGNC:8587]
202534_x_at	DHFR	11 x 1	5 q14	dihydrofolate reductase [Source:HGNC Symbol;Acc:HGNC:2861]
211505_s_at	STAU1	7 x 7	20 q13	staufen double-stranded RNA binding protein 1 [Source:HGNC Symbol;Acc:HGNC:11370]
222077_s_at	RACGAP1	1 x 1	12 q13	Rac GTPase activating protein 1 [Source:HGNC Symbol;Acc:HGNC:9804]
221931_s_at	SEH1L	9 x 1	18 p11	SEH1 like nucleoporin [Source:HGNC Symbol;Acc:HGNC:30379]
218308_at	TACC3	3 x 1	4 p16	transforming acidic coiled-coil containing protein 3 [Source:HGNC Symbol;Acc:HGNC:11524]
201075_s_at	SMARCC1	4 x 7	3 p21	SWI/SNF related, matrix associated, actin dependent regulator of chromatin subfamily c member 1 [Source:HGNC Symbol;Acc:HGNC:11104]
210541_s_at	TRIM27	3 x 7	6 p22	tripartite motif containing 27 [Source:HGNC Symbol;Acc:HGNC:9975]
40255_at	DDX28	9 x 4	16 q22	DEAD-box helicase 28 [Source:HGNC Symbol;Acc:HGNC:17330]
218493_at	SNRNP25	10 x 4	16 p13	small nuclear ribonucleoprotein U11/U12 subunit 25 [Source:HGNC Symbol;Acc:HGNC:14161]
201697_s_at	DNMT1	11 x 1	19 p13	DNA methyltransferase 1 [Source:HGNC Symbol;Acc:HGNC:2976]
217140_s_at		3 x 6	X q21	voltage dependent anion channel 1 pseudogene 3 [Source:HGNC Symbol;Acc:HGNC:37478]
208802_at	SRP72	9 x 6	4 q12	signal recognition particle 72 [Source:HGNC Symbol;Acc:HGNC:11303]
201202_at	PCNA	1 x 2	20 p12	proliferating cell nuclear antigen [Source:HGNC Symbol;Acc:HGNC:8729]
50314_i_at	C20orf27	5 x 5	20 p13	chromosome 20 open reading frame 27 [Source:HGNC Symbol;Acc:HGNC:15873]
218575_at	ANAPC1	8 x 1	2 q13	anaphase promoting complex subunit 1 [Source:HGNC Symbol;Acc:HGNC:19988]
212211_at	ANKRD17	6 x 6	4 q13	ankyrin repeat domain 17 [Source:HGNC Symbol;Acc:HGNC:23575]
200806_s_at	HSPD1	4 x 6	2 q33	heat shock protein family D (Hsp60) member 1 [Source:HGNC Symbol;Acc:HGNC:5261]
221437_s_at	MRPS15	7 x 4	1 p34	mitochondrial ribosomal protein S15 [Source:HGNC Symbol;Acc:HGNC:14504]
201292_at	TOP2A	1 x 1	17 q21	topoisomerase (DNA) II alpha [Source:HGNC Symbol;Acc:HGNC:11989]
202216_x_at	NFYC	2 x 7	1 p34	nuclear transcription factor Y subunit gamma [Source:HGNC Symbol;Acc:HGNC:7806]
201013_s_at	PAICS	2 x 1	4 q12	phosphoribosylaminoimidazole carboxylase and phosphoribosylaminoimidazolesuccinocarboxamide synthase [Source:HGNC Symbol;Acc:HGNC:8587]
201577_at	NME1-NME2	3 x 2	17 q21	NME1-NME2 readthrough [Source:HGNC Symbol;Acc:HGNC:33531]
202737_s_at	LSM4	11 x 1	19 p13	LSM4 homolog, U6 small nuclear RNA and mRNA degradation associated [Source:HGNC Symbol;Acc:HGNC:17259]
201514_s_at	G3BP1	1 x 5	5 q33	G3BP stress granule assembly factor 1 [Source:HGNC Symbol;Acc:HGNC:30292]
221531_at	WDR61	2 x 6	15 q25	WD repeat domain 61 [Source:HGNC Symbol;Acc:HGNC:30300]
202212_at	PES1	4 x 2	22 q12	pescadillo ribosomal biogenesis factor 1 [Source:HGNC Symbol;Acc:HGNC:8848]
202705_at	CCNB2	1 x 1	15 q22	cyclin B2 [Source:HGNC Symbol;Acc:HGNC:1580]
217834_s_at	SYNCRIP	1 x 4	6 q14	synaptotagmin binding cytoplasmic RNA interacting protein [Source:HGNC Symbol;Acc:HGNC:16918]
202503_s_at	PCLAF	1 x 1	15 q22	PCNA clamp associated factor [Source:HGNC Symbol;Acc:HGNC:28961]
218123_at	C21orf59	10 x 3	21 q22	chromosome 21 open reading frame 59 [Source:HGNC Symbol;Acc:HGNC:1301]
200956_s_at	SSRP1	5 x 5	11 q12	structure specific recognition protein 1 [Source:HGNC Symbol;Acc:HGNC:11327]
201478_s_at	DKC1	5 x 4	X q28	dyskerin pseudouridine synthase 1 [Source:HGNC Symbol;Acc:HGNC:2890]
200691_s_at	HSPA9	9 x 5	5 q31	heat shock protein family A (Hsp70) member 9 [Source:HGNC Symbol;Acc:HGNC:5244]
208910_s_at	C1QBP	6 x 5	17 p13	complement C1q binding protein [Source:HGNC Symbol;Acc:HGNC:1243]
204178_s_at	RBM14	9 x 5	11 q13	RNA binding motif protein 14 [Source:HGNC Symbol;Acc:HGNC:14219]
210011_s_at	EWSR1	7 x 5	22 q12	EWS RNA binding protein 1 [Source:HGNC Symbol;Acc:HGNC:3508]
202736_s_at	LSM4	6 x 7	19 p13	LSM4 homolog, U6 small nuclear RNA and mRNA degradation associated [Source:HGNC Symbol;Acc:HGNC:17259]
208828_at	POLE3	7 x 7	9 q32	DNA polymerase epsilon 3, accessory subunit [Source:HGNC Symbol;Acc:HGNC:13546]
218119_at	TIMM23	4 x 7	10 q11	translocase of inner mitochondrial membrane 23 [Source:HGNC Symbol;Acc:HGNC:17312]
203087_s_at	KIF2A	1 x 6	5 q12	kinesin family member 2A [Source:HGNC Symbol;Acc:HGNC:6318]
201267_s_at	PSMC3	5 x 6	11 p11	proteasome 26S subunit, ATPase 3 [Source:HGNC Symbol;Acc:HGNC:9549]
201529_s_at	RPA1	1 x 6	17 p13	replication protein A1 [Source:HGNC Symbol;Acc:HGNC:10289]
202184_s_at	NUP133	11 x 1	1 q42	nucleoporin 133 [Source:HGNC Symbol;Acc:HGNC:18016]
200052_s_at	ILF2	8 x 7	1 q21	interleukin enhancer binding factor 2 [Source:HGNC Symbol;Acc:HGNC:6037]
217725_x_at	SERBP1	5 x 7	1 p31	SERPINE1 mRNA binding protein 1 [Source:HGNC Symbol;Acc:HGNC:17860]

## Sheet: Module E
ID	Symbol	Metagene	Chromosome	Description
206018_at	FOXG1	1 x 24	14 q12	forkhead box G1 [Source:HGNC Symbol;Acc:HGNC:3811]
210551_s_at	ASMT	1 x 23	X p22	acetylserotonin O-methyltransferase [Source:HGNC Symbol;Acc:HGNC:750]
206218_at	MAGEB2	1 x 24	X p21	MAGE family member B2 [Source:HGNC Symbol;Acc:HGNC:6809]
207534_at	MAGEB1	1 x 23	X p21	MAGE family member B1 [Source:HGNC Symbol;Acc:HGNC:6808]
206779_s_at	ASMT	1 x 24	X p22	acetylserotonin O-methyltransferase [Source:HGNC Symbol;Acc:HGNC:750]
220565_at	CCR10	1 x 23	17 q21	C-C motif chemokine receptor 10 [Source:HGNC Symbol;Acc:HGNC:4474]
202274_at	ACTG2	1 x 23	2 p13	actin, gamma 2, smooth muscle, enteric [Source:HGNC Symbol;Acc:HGNC:145]
204086_at	PRAME	1 x 23	22 q11	preferentially expressed antigen in melanoma [Source:HGNC Symbol;Acc:HGNC:9336]
220161_s_at	EPB41L4B	1 x 23	9 q31	erythrocyte membrane protein band 4.1 like 4B [Source:HGNC Symbol;Acc:HGNC:19818]
219959_at	MOCOS	1 x 23	18 q12	molybdenum cofactor sulfurase [Source:HGNC Symbol;Acc:HGNC:18234]
203510_at	MET	1 x 23	7 q31	MET proto-oncogene, receptor tyrosine kinase [Source:HGNC Symbol;Acc:HGNC:7029]
220105_at	RSPH14	1 x 23	22 q11	radial spoke head 14 homolog [Source:HGNC Symbol;Acc:HGNC:13437]
205234_at	SLC16A4	2 x 23	1 p13	solute carrier family 16 member 4 [Source:HGNC Symbol;Acc:HGNC:10925]
219360_s_at	TRPM4	1 x 23	19 q13	transient receptor potential cation channel subfamily M member 4 [Source:HGNC Symbol;Acc:HGNC:17993]
202986_at	ARNT2	1 x 24	15 q25	aryl hydrocarbon receptor nuclear translocator 2 [Source:HGNC Symbol;Acc:HGNC:16876]
210753_s_at	EPHB1	1 x 24	3 q22	EPH receptor B1 [Source:HGNC Symbol;Acc:HGNC:3392]
207245_at	UGT2B17	1 x 24	4 q13	UDP glucuronosyltransferase family 2 member B17 [Source:HGNC Symbol;Acc:HGNC:12547]
219255_x_at	IL17RB	1 x 24	3 p21	interleukin 17 receptor B [Source:HGNC Symbol;Acc:HGNC:18015]
222025_s_at	OPLAH	1 x 23	8 q24	5-oxoprolinase (ATP-hydrolysing) [Source:HGNC Symbol;Acc:HGNC:8149]
214412_at	H2AFB1	1 x 23	X q28	H2A histone family member B1 [Source:HGNC Symbol;Acc:HGNC:22516]
33197_at	MYO7A	1 x 24	11 q13	myosin VIIA [Source:HGNC Symbol;Acc:HGNC:7606]
222281_s_at	C1orf186	1 x 23	1 q32	chromosome 1 open reading frame 186 [Source:HGNC Symbol;Acc:HGNC:25341]
206975_at	LTA	1 x 24	6 p21	lymphotoxin alpha [Source:HGNC Symbol;Acc:HGNC:6709]
210108_at	CACNA1D	1 x 24	3 p21	calcium voltage-gated channel subunit alpha1 D [Source:HGNC Symbol;Acc:HGNC:1391]
203835_at	LRRC32	1 x 23	11 q13	leucine rich repeat containing 32 [Source:HGNC Symbol;Acc:HGNC:4161]
213497_at	ABTB2	1 x 24	11 p13	ankyrin repeat and BTB domain containing 2 [Source:HGNC Symbol;Acc:HGNC:23842]
212183_at	NUDT4	1 x 22	12 q22	nudix hydrolase 4 [Source:HGNC Symbol;Acc:HGNC:8051]
213622_at	COL9A2	1 x 23	1 p34	collagen type IX alpha 2 chain [Source:HGNC Symbol;Acc:HGNC:2218]
221211_s_at	MAP3K7CL	1 x 24	21 q21	MAP3K7 C-terminal like [Source:HGNC Symbol;Acc:HGNC:16457]
214955_at	TMPRSS6	1 x 23	22 q12	transmembrane protease, serine 6 [Source:HGNC Symbol;Acc:HGNC:16517]
202421_at	IGSF3	1 x 24	1 p13	immunoglobulin superfamily member 3 [Source:HGNC Symbol;Acc:HGNC:5950]
212445_s_at	NEDD4L	1 x 23	18 q21	neural precursor cell expressed, developmentally down-regulated 4-like, E3 ubiquitin protein ligase [Source:HGNC Symbol;Acc:HGNC:7728]
207813_s_at	FDXR	1 x 22	17 q25	ferredoxin reductase [Source:HGNC Symbol;Acc:HGNC:3642]
213651_at	INPP5J	1 x 24	22 q12	inositol polyphosphate-5-phosphatase J [Source:HGNC Symbol;Acc:HGNC:8956]
208086_s_at	DMD	1 x 24	X p21	dystrophin [Source:HGNC Symbol;Acc:HGNC:2928]
213150_at	HOXA10	1 x 24	7 p15	homeobox A10 [Source:HGNC Symbol;Acc:HGNC:5100]
209863_s_at	TP63	1 x 23	3 q28	tumor protein p63 [Source:HGNC Symbol;Acc:HGNC:15979]
205222_at	EHHADH	1 x 23	3 q27	enoyl-CoA hydratase and 3-hydroxyacyl CoA dehydrogenase [Source:HGNC Symbol;Acc:HGNC:3247]
213807_x_at	MET	1 x 25	7 q31	MET proto-oncogene, receptor tyrosine kinase [Source:HGNC Symbol;Acc:HGNC:7029]
211194_s_at	TP63	1 x 24	3 q28	tumor protein p63 [Source:HGNC Symbol;Acc:HGNC:15979]
213385_at	CHN2	1 x 23	7 p14	chimerin 2 [Source:HGNC Symbol;Acc:HGNC:1944]
213844_at	HOXA5	1 x 25	7 p15	homeobox A5 [Source:HGNC Symbol;Acc:HGNC:5106]
201313_at	ENO2	1 x 25	12 p13	enolase 2 [Source:HGNC Symbol;Acc:HGNC:3353]
211898_s_at	EPHB1	1 x 24	3 q22	EPH receptor B1 [Source:HGNC Symbol;Acc:HGNC:3392]
220230_s_at	CYB5R2	1 x 23	11 p15	cytochrome b5 reductase 2 [Source:HGNC Symbol;Acc:HGNC:24376]
204999_s_at	ATF5	1 x 23	19 q13	activating transcription factor 5 [Source:HGNC Symbol;Acc:HGNC:790]
212338_at	MYO1D	1 x 23	17 q11	myosin ID [Source:HGNC Symbol;Acc:HGNC:7598]
203348_s_at	ETV5	1 x 25	3 q27	ETS variant 5 [Source:HGNC Symbol;Acc:HGNC:3494]
206034_at	SERPINB8	1 x 23	18 q22	serpin family B member 8 [Source:HGNC Symbol;Acc:HGNC:8952]
219956_at	GALNT6	1 x 24	12 q13	polypeptide N-acetylgalactosaminyltransferase 6 [Source:HGNC Symbol;Acc:HGNC:4128]
209636_at	NFKB2	2 x 24	10 q24	nuclear factor kappa B subunit 2 [Source:HGNC Symbol;Acc:HGNC:7795]
213147_at	HOXA10	1 x 25	7 p15	homeobox A10 [Source:HGNC Symbol;Acc:HGNC:5100]
216375_s_at	ETV5	1 x 25	3 q27	ETS variant 5 [Source:HGNC Symbol;Acc:HGNC:3494]
209000_s_at	2008-09-01	1 x 25	5 q31	septin 8 [Source:HGNC Symbol;Acc:HGNC:16511]
219082_at	AMDHD2	1 x 22	16 p13	amidohydrolase domain containing 2 [Source:HGNC Symbol;Acc:HGNC:24262]
206395_at	DGKG	1 x 25	3 q27	diacylglycerol kinase gamma [Source:HGNC Symbol;Acc:HGNC:2853]
202997_s_at	LOXL2	1 x 24	8 p21	lysyl oxidase like 2 [Source:HGNC Symbol;Acc:HGNC:6666]
222126_at	AGFG2	2 x 22	7 q22	ArfGAP with FG repeats 2 [Source:HGNC Symbol;Acc:HGNC:5177]
219271_at	GALNT14	1 x 23	2 p23	polypeptide N-acetylgalactosaminyltransferase 14 [Source:HGNC Symbol;Acc:HGNC:22946]
219038_at	MORC4	1 x 25	X q22	MORC family CW-type zinc finger 4 [Source:HGNC Symbol;Acc:HGNC:23485]
218530_at	FHOD1	2 x 22	16 q22	formin homology 2 domain containing 1 [Source:HGNC Symbol;Acc:HGNC:17905]
206039_at	RAB33A	1 x 24	X q26	RAB33A, member RAS oncogene family [Source:HGNC Symbol;Acc:HGNC:9773]
214639_s_at	HOXA1	1 x 24	7 p15	homeobox A1 [Source:HGNC Symbol;Acc:HGNC:5099]
207630_s_at	CREM	1 x 25	10 p11	cAMP responsive element modulator [Source:HGNC Symbol;Acc:HGNC:2352]
218872_at	TESC	1 x 23	12 q24	tescalcin [Source:HGNC Symbol;Acc:HGNC:26065]
203881_s_at	DMD	2 x 23	X p21	dystrophin [Source:HGNC Symbol;Acc:HGNC:2928]
204866_at	JADE3	1 x 23	X p11	jade family PHD finger 3 [Source:HGNC Symbol;Acc:HGNC:22982]
204068_at	STK3	1 x 22	8 q22	serine/threonine kinase 3 [Source:HGNC Symbol;Acc:HGNC:11406]
205179_s_at	ADAM8	1 x 23	10 q26	ADAM metallopeptidase domain 8 [Source:HGNC Symbol;Acc:HGNC:215]
214106_s_at	GMDS	1 x 23	6 p25	GDP-mannose 4,6-dehydratase [Source:HGNC Symbol;Acc:HGNC:4369]
210550_s_at	RASGRF1	1 x 23	15 q25	Ras protein specific guanine nucleotide releasing factor 1 [Source:HGNC Symbol;Acc:HGNC:9875]
212906_at	GRAMD1B	1 x 24	11 q24	GRAM domain containing 1B [Source:HGNC Symbol;Acc:HGNC:29214]
216733_s_at	GATM	1 x 23	15 q21	glycine amidinotransferase [Source:HGNC Symbol;Acc:HGNC:4175]
206659_at		1 x 24	2 q11
220941_s_at	C21orf91	1 x 25	21 q21	chromosome 21 open reading frame 91 [Source:HGNC Symbol;Acc:HGNC:16459]
204875_s_at	GMDS	1 x 23	6 p25	GDP-mannose 4,6-dehydratase [Source:HGNC Symbol;Acc:HGNC:4369]
209321_s_at	ADCY3	1 x 22	2 p23	adenylate cyclase 3 [Source:HGNC Symbol;Acc:HGNC:234]
219080_s_at	CTPS2	1 x 23	X p22	CTP synthase 2 [Source:HGNC Symbol;Acc:HGNC:2520]
204998_s_at	ATF5	1 x 23	19 q13	activating transcription factor 5 [Source:HGNC Symbol;Acc:HGNC:790]
203178_at	GATM	1 x 24	15 q21	glycine amidinotransferase [Source:HGNC Symbol;Acc:HGNC:4175]
210609_s_at	TP53I3	1 x 24	2 p23	tumor protein p53 inducible protein 3 [Source:HGNC Symbol;Acc:HGNC:19373]
204269_at	PIM2	1 x 23	X p11	Pim-2 proto-oncogene, serine/threonine kinase [Source:HGNC Symbol;Acc:HGNC:8987]
215603_x_at		1 x 24	13 q11	gamma-glutamyltransferase 4 pseudogene [Source:HGNC Symbol;Acc:HGNC:33207]
202660_at	ITPR2	1 x 25	12 p11	inositol 1,4,5-trisphosphate receptor type 2 [Source:HGNC Symbol;Acc:HGNC:6181]
207131_x_at		1 x 24	22 q11	gamma-glutamyltransferase light chain 4 pseudogene [Source:HGNC Symbol;Acc:HGNC:33428]
208284_x_at		1 x 24	22 q11	gamma-glutamyltransferase light chain 4 pseudogene [Source:HGNC Symbol;Acc:HGNC:33428]
219259_at	SEMA4A	1 x 24	1 q22	semaphorin 4A [Source:HGNC Symbol;Acc:HGNC:10729]
205536_at	VAV2	2 x 24	9 q34	vav guanine nucleotide exchange factor 2 [Source:HGNC Symbol;Acc:HGNC:12658]
211417_x_at		1 x 24	22 q11	gamma-glutamyltransferase light chain 4 pseudogene [Source:HGNC Symbol;Acc:HGNC:33428]
209919_x_at		1 x 24	22 q11	gamma-glutamyltransferase light chain 4 pseudogene [Source:HGNC Symbol;Acc:HGNC:33428]
219021_at	RNF121	2 x 24	11 q13	ring finger protein 121 [Source:HGNC Symbol;Acc:HGNC:21070]
204872_at	TLE4	2 x 25	9 q21	transducin like enhancer of split 4 [Source:HGNC Symbol;Acc:HGNC:11840]
212312_at	BCL2L1	1 x 23	20 q11	BCL2 like 1 [Source:HGNC Symbol;Acc:HGNC:992]
211416_x_at	GGTLC1	1 x 25	20 p11	gamma-glutamyltransferase light chain 1 [Source:HGNC Symbol;Acc:HGNC:16437]
209193_at	PIM1	1 x 23	6 p21	Pim-1 proto-oncogene, serine/threonine kinase [Source:HGNC Symbol;Acc:HGNC:8986]
209628_at	NXT2	1 x 24	X q23	nuclear transport factor 2 like export factor 2 [Source:HGNC Symbol;Acc:HGNC:18151]
204794_at	DUSP2	1 x 24	2 q11	dual specificity phosphatase 2 [Source:HGNC Symbol;Acc:HGNC:3068]
204493_at	BID	1 x 22	22 q11	BH3 interacting domain death agonist [Source:HGNC Symbol;Acc:HGNC:1050]
212841_s_at	PPFIBP2	2 x 24	11 p15	PPFIA binding protein 2 [Source:HGNC Symbol;Acc:HGNC:9250]
204639_at	ADA	1 x 23	20 q13	adenosine deaminase [Source:HGNC Symbol;Acc:HGNC:186]
211725_s_at	BID	1 x 22	22 q11	BH3 interacting domain death agonist [Source:HGNC Symbol;Acc:HGNC:1050]
214864_s_at	GRHPR	1 x 23	9 p13	glyoxylate and hydroxypyruvate reductase [Source:HGNC Symbol;Acc:HGNC:4570]
209037_s_at	EHD1	2 x 24	11 q13	EH domain containing 1 [Source:HGNC Symbol;Acc:HGNC:3242]
204241_at	ACOX3	2 x 22	4 p16	acyl-CoA oxidase 3, pristanoyl [Source:HGNC Symbol;Acc:HGNC:121]
214449_s_at		1 x 25	2 q21	ras homolog family member Q pseudogene 2 [Source:HGNC Symbol;Acc:HGNC:37836]
216308_x_at	GRHPR	1 x 24	9 p13	glyoxylate and hydroxypyruvate reductase [Source:HGNC Symbol;Acc:HGNC:4570]
209272_at	NAB1	1 x 23	2 q32	NGFI-A binding protein 1 [Source:HGNC Symbol;Acc:HGNC:7626]
216705_s_at	ADA	1 x 23	20 q13	adenosine deaminase [Source:HGNC Symbol;Acc:HGNC:186]
201347_x_at	GRHPR	1 x 24	9 p13	glyoxylate and hydroxypyruvate reductase [Source:HGNC Symbol;Acc:HGNC:4570]
219971_at	IL21R	1 x 24	16 p12	interleukin 21 receptor [Source:HGNC Symbol;Acc:HGNC:6006]
202205_at	VASP	1 x 25	19 q13	vasodilator-stimulated phosphoprotein [Source:HGNC Symbol;Acc:HGNC:12652]
203262_s_at	FAM50A	2 x 25	X q28	family with sequence similarity 50 member A [Source:HGNC Symbol;Acc:HGNC:18786]
208091_s_at	VOPP1	1 x 25	7 p11	vesicular, overexpressed in cancer, prosurvival protein 1 [Source:HGNC Symbol;Acc:HGNC:34518]

## Sheet: Module F
ID	Symbol	Metagene	Chromosome	Description
208168_s_at	CHIT1	1 x 45	1 q32	chitinase 1 [Source:HGNC Symbol;Acc:HGNC:1936]
204006_s_at	FCGR3A	1 x 43	1 q23	Fc fragment of IgG receptor IIIa [Source:HGNC Symbol;Acc:HGNC:3619]
205819_at	MARCO	1 x 42	2 q14	macrophage receptor with collagenous structure [Source:HGNC Symbol;Acc:HGNC:6895]
204787_at	VSIG4	1 x 43	X q12	V-set and immunoglobulin domain containing 4 [Source:HGNC Symbol;Acc:HGNC:17032]
219316_s_at	FLVCR2	1 x 42	14 q24	feline leukemia virus subgroup C cellular receptor family member 2 [Source:HGNC Symbol;Acc:HGNC:20105]
219519_s_at	SIGLEC1	1 x 43	20 p13	sialic acid binding Ig like lectin 1 [Source:HGNC Symbol;Acc:HGNC:11127]
219836_at	ZBED2	1 x 43	3 q13	zinc finger BED-type containing 2 [Source:HGNC Symbol;Acc:HGNC:20710]
205495_s_at	GNLY	1 x 44	2 p11	granulysin [Source:HGNC Symbol;Acc:HGNC:4414]
203535_at	S100A9	1 x 43	1 q21	S100 calcium binding protein A9 [Source:HGNC Symbol;Acc:HGNC:10499]
202917_s_at	S100A8	1 x 44	1 q21	S100 calcium binding protein A8 [Source:HGNC Symbol;Acc:HGNC:10498]
211864_s_at	MYOF	1 x 45	10 q23	myoferlin [Source:HGNC Symbol;Acc:HGNC:3656]
214511_x_at		1 x 44	1 q21	Fc fragment of IgG receptor Ic, pseudogene [Source:HGNC Symbol;Acc:HGNC:3615]
37145_at	GNLY	1 x 44	2 p11	granulysin [Source:HGNC Symbol;Acc:HGNC:4414]
203665_at	HMOX1	1 x 47	22 q12	heme oxygenase 1 [Source:HGNC Symbol;Acc:HGNC:5013]
210354_at	IFNG	1 x 44	12 q15	interferon gamma [Source:HGNC Symbol;Acc:HGNC:5438]
207681_at	CXCR3	2 x 43	X q13	C-X-C motif chemokine receptor 3 [Source:HGNC Symbol;Acc:HGNC:4540]
214038_at	CCL8	1 x 43	17 q12	C-C motif chemokine ligand 8 [Source:HGNC Symbol;Acc:HGNC:10635]
219938_s_at	PSTPIP2	1 x 42	18 q21	proline-serine-threonine phosphatase interacting protein 2 [Source:HGNC Symbol;Acc:HGNC:9581]
204580_at	MMP12	1 x 46	11 q22	matrix metallopeptidase 12 [Source:HGNC Symbol;Acc:HGNC:7158]
203645_s_at	CD163	1 x 45	12 p13	CD163 molecule [Source:HGNC Symbol;Acc:HGNC:1631]
205114_s_at	CCL3	1 x 42	17 q12	C-C motif chemokine ligand 3 [Source:HGNC Symbol;Acc:HGNC:10627]
216950_s_at		1 x 43	1 q21	Fc fragment of IgG receptor Ic, pseudogene [Source:HGNC Symbol;Acc:HGNC:3615]
215049_x_at	CD163	1 x 45	12 p13	CD163 molecule [Source:HGNC Symbol;Acc:HGNC:1631]
210904_s_at	IL13RA1	1 x 46	X q24	interleukin 13 receptor subunit alpha 1 [Source:HGNC Symbol;Acc:HGNC:5974]
220832_at	TLR8	1 x 42	X p22	toll like receptor 8 [Source:HGNC Symbol;Acc:HGNC:15632]
206631_at	PTGER2	1 x 42	14 q22	prostaglandin E receptor 2 [Source:HGNC Symbol;Acc:HGNC:9594]
202411_at	IFI27	1 x 47	14 q32	interferon alpha inducible protein 27 [Source:HGNC Symbol;Acc:HGNC:5397]
210163_at		1 x 44
220066_at	NOD2	1 x 42	16 q12	nucleotide binding oligomerization domain containing 2 [Source:HGNC Symbol;Acc:HGNC:5331]
204438_at	MRC1	1 x 45	10 p12	mannose receptor C-type 1 [Source:HGNC Symbol;Acc:HGNC:7228]
210029_at	IDO1	1 x 44	8 p11	indoleamine 2,3-dioxygenase 1 [Source:HGNC Symbol;Acc:HGNC:6059]
204971_at	CSTA	1 x 48	3 q21	cystatin A [Source:HGNC Symbol;Acc:HGNC:2481]
202071_at	SDC4	1 x 47	20 q13	syndecan 4 [Source:HGNC Symbol;Acc:HGNC:10661]
220005_at	P2RY13	1 x 45	3 q25	purinergic receptor P2Y13 [Source:HGNC Symbol;Acc:HGNC:4537]
202833_s_at	SERPINA1	1 x 45	14 q32	serpin family A member 1 [Source:HGNC Symbol;Acc:HGNC:8941]
204747_at	IFIT3	1 x 42	10 q23	interferon induced protein with tetratricopeptide repeats 3 [Source:HGNC Symbol;Acc:HGNC:5411]
206914_at	CRTAM	1 x 44	11 q24	cytotoxic and regulatory T-cell molecule [Source:HGNC Symbol;Acc:HGNC:24313]
205119_s_at	FPR1	1 x 44	19 q13	formyl peptide receptor 1 [Source:HGNC Symbol;Acc:HGNC:3826]
218454_at	PLBD1	1 x 46	12 p13	phospholipase B domain containing 1 [Source:HGNC Symbol;Acc:HGNC:26215]
210321_at	GZMH	1 x 44	14 q12	granzyme H [Source:HGNC Symbol;Acc:HGNC:4710]
205844_at	VNN1	1 x 48	6 q23	vanin 1 [Source:HGNC Symbol;Acc:HGNC:12705]
202897_at	SIRPA	1 x 46	20 p13	signal regulatory protein alpha [Source:HGNC Symbol;Acc:HGNC:9662]
209396_s_at	CHI3L1	1 x 46	1 q32	chitinase 3 like 1 [Source:HGNC Symbol;Acc:HGNC:1932]
208594_x_at	LILRA6	1 x 43	19 q13	leukocyte immunoglobulin like receptor A6 [Source:HGNC Symbol;Acc:HGNC:15495]
213056_at	FRMD4B	1 x 46	3 p14	FERM domain containing 4B [Source:HGNC Symbol;Acc:HGNC:24886]
214450_at	CTSW	2 x 44	11 q13	cathepsin W [Source:HGNC Symbol;Acc:HGNC:2546]
206486_at	LAG3	1 x 44	12 p13	lymphocyte activating 3 [Source:HGNC Symbol;Acc:HGNC:6476]
201798_s_at	MYOF	1 x 47	10 q23	myoferlin [Source:HGNC Symbol;Acc:HGNC:3656]
204959_at	MNDA	1 x 43	1 q23	myeloid cell nuclear differentiation antigen [Source:HGNC Symbol;Acc:HGNC:7183]
209230_s_at	NUPR1	1 x 47	16 p11	nuclear protein 1, transcriptional regulator [Source:HGNC Symbol;Acc:HGNC:29990]
209949_at	NCF2	1 x 43	1 q25	neutrophil cytosolic factor 2 [Source:HGNC Symbol;Acc:HGNC:7661]
221530_s_at	BHLHE41	1 x 42	12 p12	basic helix-loop-helix family member e41 [Source:HGNC Symbol;Acc:HGNC:16617]
207651_at	GPR171	1 x 44	3 q25	G protein-coupled receptor 171 [Source:HGNC Symbol;Acc:HGNC:30057]
211122_s_at	CXCL11	1 x 44	4 q21	C-X-C motif chemokine ligand 11 [Source:HGNC Symbol;Acc:HGNC:10638]
210916_s_at	CD44	1 x 43	11 p13	CD44 molecule (Indian blood group) [Source:HGNC Symbol;Acc:HGNC:1681]
202075_s_at	PLTP	1 x 47	20 q13	phospholipid transfer protein [Source:HGNC Symbol;Acc:HGNC:9093]
206341_at	IL2RA	1 x 42	10 p15	interleukin 2 receptor subunit alpha [Source:HGNC Symbol;Acc:HGNC:6008]
211333_s_at	FASLG	1 x 42	1 q24	Fas ligand [Source:HGNC Symbol;Acc:HGNC:11936]
205842_s_at	JAK2	1 x 43	9 p24	Janus kinase 2 [Source:HGNC Symbol;Acc:HGNC:6192]
202953_at	C1QB	1 x 46	1 p36	complement C1q B chain [Source:HGNC Symbol;Acc:HGNC:1242]
212224_at	ALDH1A1	1 x 45	9 q21	aldehyde dehydrogenase 1 family member A1 [Source:HGNC Symbol;Acc:HGNC:402]
221900_at	COL8A2	2 x 47	1 p34	collagen type VIII alpha 2 chain [Source:HGNC Symbol;Acc:HGNC:2216]
211612_s_at	IL13RA1	1 x 46	X q24	interleukin 13 receptor subunit alpha 1 [Source:HGNC Symbol;Acc:HGNC:5974]
202855_s_at	SLC16A3	1 x 42	17 q25	solute carrier family 16 member 3 [Source:HGNC Symbol;Acc:HGNC:10924]
218999_at	TMEM140	1 x 43	7 q33	transmembrane protein 140 [Source:HGNC Symbol;Acc:HGNC:21870]
214992_s_at	DNASE2	1 x 44	19 p13	deoxyribonuclease 2, lysosomal [Source:HGNC Symbol;Acc:HGNC:2960]
211429_s_at	SERPINA1	1 x 46	14 q32	serpin family A member 1 [Source:HGNC Symbol;Acc:HGNC:8941]
201348_at	GPX3	1 x 47	5 q33	glutathione peroxidase 3 [Source:HGNC Symbol;Acc:HGNC:4555]
203052_at	C2	1 x 45	6 p21	complement C2 [Source:HGNC Symbol;Acc:HGNC:1248]
211469_s_at	CXCR6	1 x 44	3 p21	C-X-C motif chemokine receptor 6 [Source:HGNC Symbol;Acc:HGNC:16647]
208791_at	CLU	1 x 47	8 p21	clusterin [Source:HGNC Symbol;Acc:HGNC:2095]
201169_s_at	BHLHE40	1 x 44	3 p26	basic helix-loop-helix family member e40 [Source:HGNC Symbol;Acc:HGNC:1046]
201743_at	CD14	1 x 47	5 q31	CD14 molecule [Source:HGNC Symbol;Acc:HGNC:1628]
219424_at	EBI3	1 x 42	19 p13	Epstein-Barr virus induced 3 [Source:HGNC Symbol;Acc:HGNC:3129]
209395_at	CHI3L1	1 x 46	1 q32	chitinase 3 like 1 [Source:HGNC Symbol;Acc:HGNC:1932]
219607_s_at	MS4A4A	1 x 47	11 q12	membrane spanning 4-domains A4A [Source:HGNC Symbol;Acc:HGNC:13371]
219584_at	PLA1A	1 x 45	3 q13	phospholipase A1 member A [Source:HGNC Symbol;Acc:HGNC:17661]
202898_at	SDC3	2 x 45	1 p35	syndecan 3 [Source:HGNC Symbol;Acc:HGNC:10660]
210164_at	GZMB	1 x 44	14 q12	granzyme B [Source:HGNC Symbol;Acc:HGNC:4709]
206099_at		1 x 45	14 q23
201042_at	TGM2	1 x 46	20 q11	transglutaminase 2 [Source:HGNC Symbol;Acc:HGNC:11778]
207697_x_at	LILRB2	1 x 43	19 q13	leukocyte immunoglobulin like receptor B2 [Source:HGNC Symbol;Acc:HGNC:6606]
206461_x_at	MT1H	1 x 42	16 q13	metallothionein 1H [Source:HGNC Symbol;Acc:HGNC:7400]
213415_at	CLIC2	2 x 46	X q28	chloride intracellular channel 2 [Source:HGNC Symbol;Acc:HGNC:2063]
205404_at	HSD11B1	1 x 44	1 q32	hydroxysteroid 11-beta dehydrogenase 1 [Source:HGNC Symbol;Acc:HGNC:5208]
208146_s_at	CPVL	1 x 45	7 p14	carboxypeptidase, vitellogenic like [Source:HGNC Symbol;Acc:HGNC:14399]
49306_at	RASSF4	1 x 45	10 q11	Ras association domain family member 4 [Source:HGNC Symbol;Acc:HGNC:20793]
203382_s_at	APOE	1 x 48	19 q13	apolipoprotein E [Source:HGNC Symbol;Acc:HGNC:613]
213716_s_at	SECTM1	1 x 44	17 q25	secreted and transmembrane 1 [Source:HGNC Symbol;Acc:HGNC:10707]
211495_x_at	TNFSF12-TNFSF13	1 x 45	17 p13	TNFSF12-TNFSF13 readthrough [Source:HGNC Symbol;Acc:HGNC:33537]
206974_at	CXCR6	1 x 44	3 p21	C-X-C motif chemokine receptor 6 [Source:HGNC Symbol;Acc:HGNC:16647]
218232_at	C1QA	1 x 46	1 p36	complement C1q A chain [Source:HGNC Symbol;Acc:HGNC:1241]
221578_at	RASSF4	1 x 44	10 q11	Ras association domain family member 4 [Source:HGNC Symbol;Acc:HGNC:20793]
205599_at	TRAF1	1 x 43	9 q33	TNF receptor associated factor 1 [Source:HGNC Symbol;Acc:HGNC:12031]
205242_at	CXCL13	1 x 47	4 q21	C-X-C motif chemokine ligand 13 [Source:HGNC Symbol;Acc:HGNC:10639]
203472_s_at	SLCO2B1	2 x 45	11 q13	solute carrier organic anion transporter family member 2B1 [Source:HGNC Symbol;Acc:HGNC:10962]
216598_s_at	CCL2	1 x 47	17 q12	C-C motif chemokine ligand 2 [Source:HGNC Symbol;Acc:HGNC:10618]
213915_at	NKG7	1 x 45	19 q13	natural killer cell granule protein 7 [Source:HGNC Symbol;Acc:HGNC:7830]
209813_x_at		1 x 45	7 p14	T-cell receptor gamma constant 2 [Source:HGNC Symbol;Acc:HGNC:12276]
219684_at	RTP4	1 x 42	3 q27	receptor transporter protein 4 [Source:HGNC Symbol;Acc:HGNC:23992]
215806_x_at		1 x 45	7 p14	T-cell receptor gamma constant 2 [Source:HGNC Symbol;Acc:HGNC:12276]
212884_x_at	APOE	1 x 47	19 q13	apolipoprotein E [Source:HGNC Symbol;Acc:HGNC:613]
200986_at	SERPING1	1 x 47	11 q12	serpin family G member 1 [Source:HGNC Symbol;Acc:HGNC:1228]
204489_s_at	CD44	1 x 43	11 p13	CD44 molecule (Indian blood group) [Source:HGNC Symbol;Acc:HGNC:1681]
216920_s_at		1 x 45	7 p14	T-cell receptor gamma constant 2 [Source:HGNC Symbol;Acc:HGNC:12276]
AFFX-HUMISGF3A/M97935_5_at	STAT1	1 x 44	2 q32	signal transducer and activator of transcription 1 [Source:HGNC Symbol;Acc:HGNC:11362]
214091_s_at	GPX3	2 x 47	5 q33	glutathione peroxidase 3 [Source:HGNC Symbol;Acc:HGNC:4555]
210140_at	CST7	1 x 45	20 p11	cystatin F [Source:HGNC Symbol;Acc:HGNC:2479]
209508_x_at	CFLAR	1 x 42	2 q33	CASP8 and FADD like apoptosis regulator [Source:HGNC Symbol;Acc:HGNC:1876]
212014_x_at	CD44	1 x 43	11 p13	CD44 molecule (Indian blood group) [Source:HGNC Symbol;Acc:HGNC:1681]
206710_s_at	EPB41L3	1 x 45	18 p11	erythrocyte membrane protein band 4.1 like 3 [Source:HGNC Symbol;Acc:HGNC:3380]
204924_at	TLR2	1 x 44	4 q31	toll like receptor 2 [Source:HGNC Symbol;Acc:HGNC:11848]
205285_s_at	FYB	1 x 45	5 p13	FYN binding protein [Source:HGNC Symbol;Acc:HGNC:4036]
204043_at	TCN2	1 x 46	22 q12	transcobalamin 2 [Source:HGNC Symbol;Acc:HGNC:11653]
205003_at	DOCK4	2 x 45	7 q31	dedicator of cytokinesis 4 [Source:HGNC Symbol;Acc:HGNC:19192]
204490_s_at	CD44	1 x 42	11 p13	CD44 molecule (Indian blood group) [Source:HGNC Symbol;Acc:HGNC:1681]
204834_at	FGL2	1 x 45	7 q11	fibrinogen like 2 [Source:HGNC Symbol;Acc:HGNC:3696]
205639_at	AOAH	2 x 45	7 p14	acyloxyacyl hydrolase [Source:HGNC Symbol;Acc:HGNC:548]
209499_x_at	TNFSF12-TNFSF13	1 x 45	17 p13	TNFSF12-TNFSF13 readthrough [Source:HGNC Symbol;Acc:HGNC:33537]
201668_x_at	MARCKS	1 x 42	6 q21	myristoylated alanine rich protein kinase C substrate [Source:HGNC Symbol;Acc:HGNC:6759]
212859_x_at	MT1E	1 x 44	16 q13	metallothionein 1E [Source:HGNC Symbol;Acc:HGNC:7397]
207691_x_at	ENTPD1	1 x 43	10 q24	ectonucleoside triphosphate diphosphohydrolase 1 [Source:HGNC Symbol;Acc:HGNC:3363]
202087_s_at	CTSL	1 x 48	9 q21	cathepsin L [Source:HGNC Symbol;Acc:HGNC:2537]
206715_at	TFEC	1 x 44	7 q31	transcription factor EC [Source:HGNC Symbol;Acc:HGNC:11754]
209687_at	CXCL12	1 x 48	10 q11	C-X-C motif chemokine ligand 12 [Source:HGNC Symbol;Acc:HGNC:10672]
204929_s_at	VAMP5	1 x 44	2 p11	vesicle associated membrane protein 5 [Source:HGNC Symbol;Acc:HGNC:12646]
204070_at	RARRES3	1 x 44	11 q12	retinoic acid receptor responder 3 [Source:HGNC Symbol;Acc:HGNC:9869]
200923_at	LGALS3BP	1 x 47	17 q25	galectin 3 binding protein [Source:HGNC Symbol;Acc:HGNC:6564]
217202_s_at		1 x 45	11 p15
209835_x_at	CD44	1 x 43	11 p13	CD44 molecule (Indian blood group) [Source:HGNC Symbol;Acc:HGNC:1681]
207536_s_at	TNFRSF9	1 x 46	1 p36	TNF receptor superfamily member 9 [Source:HGNC Symbol;Acc:HGNC:11924]
206295_at	IL18	1 x 47	11 q23	interleukin 18 [Source:HGNC Symbol;Acc:HGNC:5986]
211144_x_at		1 x 45	7 p14	T-cell receptor gamma constant 2 [Source:HGNC Symbol;Acc:HGNC:12276]
204137_at	GPR137B	1 x 45	1 q42	G protein-coupled receptor 137B [Source:HGNC Symbol;Acc:HGNC:11862]
203915_at	CXCL9	1 x 46	4 q21	C-X-C motif chemokine ligand 9 [Source:HGNC Symbol;Acc:HGNC:7098]
205758_at	CD8A	1 x 45	2 p11	CD8a molecule [Source:HGNC Symbol;Acc:HGNC:1706]
219386_s_at	SLAMF8	1 x 46	1 q23	SLAM family member 8 [Source:HGNC Symbol;Acc:HGNC:21391]
206666_at	GZMK	1 x 46	5 q11	granzyme K [Source:HGNC Symbol;Acc:HGNC:4711]
208485_x_at	CFLAR	1 x 42	2 q33	CASP8 and FADD like apoptosis regulator [Source:HGNC Symbol;Acc:HGNC:1876]
201887_at	IL13RA1	1 x 47	X q24	interleukin 13 receptor subunit alpha 1 [Source:HGNC Symbol;Acc:HGNC:5974]
204533_at	CXCL10	1 x 45	4 q21	C-X-C motif chemokine ligand 10 [Source:HGNC Symbol;Acc:HGNC:10637]
203921_at	CHST2	1 x 42	3 q24	carbohydrate sulfotransferase 2 [Source:HGNC Symbol;Acc:HGNC:1970]
217763_s_at	RAB31	1 x 43	18 p11	RAB31, member RAS oncogene family [Source:HGNC Symbol;Acc:HGNC:9771]
204103_at	CCL4	1 x 45	17 q12	C-C motif chemokine ligand 4 [Source:HGNC Symbol;Acc:HGNC:10630]
211663_x_at		1 x 47
204416_x_at	APOC1	1 x 47	19 q13	apolipoprotein C1 [Source:HGNC Symbol;Acc:HGNC:607]
210072_at	CCL19	1 x 47	9 p13	C-C motif chemokine ligand 19 [Source:HGNC Symbol;Acc:HGNC:10617]
206392_s_at	RARRES1	1 x 48	3 q25	retinoic acid receptor responder 1 [Source:HGNC Symbol;Acc:HGNC:9867]
205488_at	GZMA	1 x 45	5 q11	granzyme A [Source:HGNC Symbol;Acc:HGNC:4708]
202896_s_at	SIRPA	1 x 44	20 p13	signal regulatory protein alpha [Source:HGNC Symbol;Acc:HGNC:9662]
210152_at	LILRB4	1 x 46	19 q13	leukocyte immunoglobulin like receptor B4 [Source:HGNC Symbol;Acc:HGNC:6608]
221060_s_at	TLR4	2 x 45	9 q33	toll like receptor 4 [Source:HGNC Symbol;Acc:HGNC:11850]
204048_s_at	PHACTR2	1 x 45	6 q24	phosphatase and actin regulator 2 [Source:HGNC Symbol;Acc:HGNC:20956]
221584_s_at	KCNMA1	2 x 46	10 q22	potassium calcium-activated channel subfamily M alpha 1 [Source:HGNC Symbol;Acc:HGNC:6284]
210644_s_at	LAIR1	1 x 45	19 q13	leukocyte associated immunoglobulin like receptor 1 [Source:HGNC Symbol;Acc:HGNC:6477]
203381_s_at	APOE	1 x 48	19 q13	apolipoprotein E [Source:HGNC Symbol;Acc:HGNC:613]
204122_at	TYROBP	1 x 47	19 q13	TYRO protein tyrosine kinase binding protein [Source:HGNC Symbol;Acc:HGNC:12449]
203927_at	NFKBIE	1 x 42	6 p21	NFKB inhibitor epsilon [Source:HGNC Symbol;Acc:HGNC:7799]
211317_s_at	CFLAR	1 x 42	2 q33	CASP8 and FADD like apoptosis regulator [Source:HGNC Symbol;Acc:HGNC:1876]
217967_s_at	FAM129A	1 x 43	1 q25	family with sequence similarity 129 member A [Source:HGNC Symbol;Acc:HGNC:16784]
203771_s_at	BLVRA	1 x 43	7 p13	biliverdin reductase A [Source:HGNC Symbol;Acc:HGNC:1062]
209500_x_at	TNFSF12-TNFSF13	1 x 46	17 p13	TNFSF12-TNFSF13 readthrough [Source:HGNC Symbol;Acc:HGNC:33537]
202510_s_at	TNFAIP2	1 x 46	14 q32	TNF alpha induced protein 2 [Source:HGNC Symbol;Acc:HGNC:11895]
218094_s_at	DBNDD2	1 x 46	20 q13	dysbindin domain containing 2 [Source:HGNC Symbol;Acc:HGNC:15881]
204232_at	FCER1G	1 x 46	1 q23	Fc fragment of IgE receptor Ig [Source:HGNC Symbol;Acc:HGNC:3611]
202269_x_at	GBP1	1 x 45	1 p22	guanylate binding protein 1 [Source:HGNC Symbol;Acc:HGNC:4182]
214617_at	PRF1	1 x 44	10 q22	perforin 1 [Source:HGNC Symbol;Acc:HGNC:9360]
212187_x_at		1 x 48	9 q34	Prostaglandin-H2 D-isomerase [Source:UniProtKB/Swiss-Prot;Acc:P41222]
32128_at	CCL18	1 x 48	17 q12	C-C motif chemokine ligand 18 [Source:HGNC Symbol;Acc:HGNC:10616]
203139_at	DAPK1	2 x 46	9 q21	death associated protein kinase 1 [Source:HGNC Symbol;Acc:HGNC:2674]
205291_at	IL2RB	1 x 44	22 q12	interleukin 2 receptor subunit beta [Source:HGNC Symbol;Acc:HGNC:6009]
209417_s_at	IFI35	1 x 42	17 q21	interferon induced protein 35 [Source:HGNC Symbol;Acc:HGNC:5399]
213274_s_at	CTSB	1 x 47	8 p23	cathepsin B [Source:HGNC Symbol;Acc:HGNC:2527]
202800_at	SLC1A3	1 x 45	5 p13	solute carrier family 1 member 3 [Source:HGNC Symbol;Acc:HGNC:10941]
213275_x_at	CTSB	2 x 47	8 p23	cathepsin B [Source:HGNC Symbol;Acc:HGNC:2527]
204858_s_at	TYMP	1 x 45	22 q13	thymidine phosphorylase [Source:HGNC Symbol;Acc:HGNC:3148]
204781_s_at	FAS	1 x 43	10 q23	Fas cell surface death receptor [Source:HGNC Symbol;Acc:HGNC:11920]
201647_s_at	SCARB2	1 x 42	4 q21	scavenger receptor class B member 2 [Source:HGNC Symbol;Acc:HGNC:1665]
219777_at	GIMAP6	1 x 46	7 q36	GTPase, IMAP family member 6 [Source:HGNC Symbol;Acc:HGNC:21918]
209474_s_at	ENTPD1	1 x 43	10 q24	ectonucleoside triphosphate diphosphohydrolase 1 [Source:HGNC Symbol;Acc:HGNC:3363]
213624_at	SMPDL3A	1 x 46	6 q22	sphingomyelin phosphodiesterase acid like 3A [Source:HGNC Symbol;Acc:HGNC:17389]
203868_s_at	VCAM1	1 x 48	1 p21	vascular cell adhesion molecule 1 [Source:HGNC Symbol;Acc:HGNC:12663]
211862_x_at	CFLAR	1 x 42	2 q33	CASP8 and FADD like apoptosis regulator [Source:HGNC Symbol;Acc:HGNC:1876]
216252_x_at	FAS	1 x 42	10 q23	Fas cell surface death receptor [Source:HGNC Symbol;Acc:HGNC:11920]
210314_x_at	TNFSF12-TNFSF13	1 x 46	17 p13	TNFSF12-TNFSF13 readthrough [Source:HGNC Symbol;Acc:HGNC:33537]
206420_at	IGSF6	1 x 46	16 p12	immunoglobulin superfamily member 6 [Source:HGNC Symbol;Acc:HGNC:5953]
201360_at	CST3	1 x 48	20 p11	cystatin C [Source:HGNC Symbol;Acc:HGNC:2475]
218035_s_at	RBM47	1 x 43	4 p14	RNA binding motif protein 47 [Source:HGNC Symbol;Acc:HGNC:30358]
204204_at	SLC31A2	1 x 45	9 q32	solute carrier family 31 member 2 [Source:HGNC Symbol;Acc:HGNC:11017]
219385_at	SLAMF8	1 x 45	1 q23	SLAM family member 8 [Source:HGNC Symbol;Acc:HGNC:21391]
201646_at	SCARB2	2 x 43	4 q21	scavenger receptor class B member 2 [Source:HGNC Symbol;Acc:HGNC:1665]
212681_at	EPB41L3	1 x 46	18 p11	erythrocyte membrane protein band 4.1 like 3 [Source:HGNC Symbol;Acc:HGNC:3380]
219593_at	SLC15A3	1 x 43	11 q12	solute carrier family 15 member 3 [Source:HGNC Symbol;Acc:HGNC:18068]
1405_i_at	CCL5	1 x 46	17 q12	C-C motif chemokine ligand 5 [Source:HGNC Symbol;Acc:HGNC:10632]
200766_at	CTSD	1 x 47	11 p15	cathepsin D [Source:HGNC Symbol;Acc:HGNC:2529]
203973_s_at	CEBPD	1 x 47	8 q11	CCAAT/enhancer binding protein delta [Source:HGNC Symbol;Acc:HGNC:1835]
200648_s_at	GLUL	1 x 46	1 q25	glutamate-ammonia ligase [Source:HGNC Symbol;Acc:HGNC:4341]
209969_s_at	STAT1	1 x 44	2 q32	signal transducer and activator of transcription 1 [Source:HGNC Symbol;Acc:HGNC:11362]
215719_x_at	FAS	1 x 43	10 q23	Fas cell surface death receptor [Source:HGNC Symbol;Acc:HGNC:11920]
202687_s_at	TNFSF10	1 x 45	3 q26	tumor necrosis factor superfamily member 10 [Source:HGNC Symbol;Acc:HGNC:11925]
209924_at	CCL18	1 x 48	17 q12	C-C motif chemokine ligand 18 [Source:HGNC Symbol;Acc:HGNC:10616]
205965_at	BATF	1 x 43	14 q24	basic leucine zipper ATF-like transcription factor [Source:HGNC Symbol;Acc:HGNC:958]
220423_at	PLA2G2D	1 x 47	1 p36	phospholipase A2 group IID [Source:HGNC Symbol;Acc:HGNC:9033]
203936_s_at	MMP9	1 x 48	20 q13	matrix metallopeptidase 9 [Source:HGNC Symbol;Acc:HGNC:7176]
203828_s_at	IL32	1 x 46	16 p13	interleukin 32 [Source:HGNC Symbol;Acc:HGNC:16830]
208018_s_at	HCK	1 x 43	20 q11	HCK proto-oncogene, Src family tyrosine kinase [Source:HGNC Symbol;Acc:HGNC:4840]
219666_at	MS4A6A	1 x 47	11 q12	membrane spanning 4-domains A6A [Source:HGNC Symbol;Acc:HGNC:13375]
209906_at	C3AR1	1 x 46	12 p13	complement C3a receptor 1 [Source:HGNC Symbol;Acc:HGNC:1319]
203104_at	CSF1R	1 x 47	5 q32	colony stimulating factor 1 receptor [Source:HGNC Symbol;Acc:HGNC:2433]
202073_at	OPTN	1 x 44	10 p13	optineurin [Source:HGNC Symbol;Acc:HGNC:17142]
AFFX-HUMISGF3A/M97935_MA_at	STAT1	1 x 44	2 q32	signal transducer and activator of transcription 1 [Source:HGNC Symbol;Acc:HGNC:11362]
207571_x_at	THEMIS2	1 x 42	1 p35	thymocyte selection associated family member 2 [Source:HGNC Symbol;Acc:HGNC:16839]
206214_at	PLA2G7	1 x 47	6 p12	phospholipase A2 group VII [Source:HGNC Symbol;Acc:HGNC:9040]
204049_s_at	PHACTR2	2 x 45	6 q24	phosphatase and actin regulator 2 [Source:HGNC Symbol;Acc:HGNC:20956]
200660_at	S100A11	2 x 47	1 q21	S100 calcium binding protein A11 [Source:HGNC Symbol;Acc:HGNC:10488]
206991_s_at	CCR5	2 x 44	3 p21	C-C motif chemokine receptor 5 (gene/pseudogene) [Source:HGNC Symbol;Acc:HGNC:1606]
201141_at	GPNMB	1 x 48	7 p15	glycoprotein nmb [Source:HGNC Symbol;Acc:HGNC:4462]
211776_s_at	EPB41L3	1 x 46	18 p11	erythrocyte membrane protein band 4.1 like 3 [Source:HGNC Symbol;Acc:HGNC:3380]
203922_s_at	CYBB	1 x 43	X p21	cytochrome b-245 beta chain [Source:HGNC Symbol;Acc:HGNC:2578]
217865_at	RNF130	2 x 45	5 q35	ring finger protein 130 [Source:HGNC Symbol;Acc:HGNC:18280]
209901_x_at	AIF1	1 x 46	6 p21	allograft inflammatory factor 1 [Source:HGNC Symbol;Acc:HGNC:352]
201850_at	CAPG	1 x 46	2 p11	capping actin protein, gelsolin like [Source:HGNC Symbol;Acc:HGNC:1474]
209568_s_at	RGL1	1 x 46	1 q25	ral guanine nucleotide dissociation stimulator like 1 [Source:HGNC Symbol;Acc:HGNC:30281]
202270_at	GBP1	1 x 45	1 p22	guanylate binding protein 1 [Source:HGNC Symbol;Acc:HGNC:4182]
204646_at	DPYD	1 x 46	1 p21	dihydropyrimidine dehydrogenase [Source:HGNC Symbol;Acc:HGNC:3012]
204655_at	CCL5	1 x 46	17 q12	C-C motif chemokine ligand 5 [Source:HGNC Symbol;Acc:HGNC:10632]
205831_at	CD2	1 x 46	1 p13	CD2 molecule [Source:HGNC Symbol;Acc:HGNC:1639]
211795_s_at	FYB	1 x 46	5 p13	FYN binding protein [Source:HGNC Symbol;Acc:HGNC:4036]
213539_at	CD3D	1 x 46	11 q23	CD3d molecule [Source:HGNC Symbol;Acc:HGNC:1673]
204912_at	IL10RA	1 x 42	11 q23	interleukin 10 receptor subunit alpha [Source:HGNC Symbol;Acc:HGNC:5964]
221210_s_at	NPL	1 x 47	1 q25	N-acetylneuraminate pyruvate lyase [Source:HGNC Symbol;Acc:HGNC:16781]
218559_s_at	MAFB	1 x 47	20 q12	MAF bZIP transcription factor B [Source:HGNC Symbol;Acc:HGNC:6408]
203920_at	NR1H3	1 x 47	11 p11	nuclear receptor subfamily 1 group H member 3 [Source:HGNC Symbol;Acc:HGNC:7966]
205681_at	BCL2A1	1 x 43	15 q25	BCL2 related protein A1 [Source:HGNC Symbol;Acc:HGNC:991]
205270_s_at	LCP2	1 x 46	5 q35	lymphocyte cytosolic protein 2 [Source:HGNC Symbol;Acc:HGNC:6529]
218805_at	GIMAP5	1 x 45	7 q36	GTPase, IMAP family member 5 [Source:HGNC Symbol;Acc:HGNC:18005]
219243_at	GIMAP4	1 x 46	7 q36	GTPase, IMAP family member 4 [Source:HGNC Symbol;Acc:HGNC:21872]
202748_at	GBP2	1 x 45	1 p22	guanylate binding protein 2 [Source:HGNC Symbol;Acc:HGNC:4183]
203508_at	TNFRSF1B	2 x 44	1 p36	TNF receptor superfamily member 1B [Source:HGNC Symbol;Acc:HGNC:11917]
207104_x_at	LILRB1	1 x 43	19 q13	leukocyte immunoglobulin like receptor B1 [Source:HGNC Symbol;Acc:HGNC:6605]
211748_x_at		1 x 47	9 q34	Prostaglandin-H2 D-isomerase [Source:UniProtKB/Swiss-Prot;Acc:P41222]
211336_x_at	LILRB1	1 x 43	19 q13	leukocyte immunoglobulin like receptor B1 [Source:HGNC Symbol;Acc:HGNC:6605]
204780_s_at	FAS	1 x 42	10 q23	Fas cell surface death receptor [Source:HGNC Symbol;Acc:HGNC:11920]
211675_s_at	MDFIC	1 x 42	7 q31	MyoD family inhibitor domain containing [Source:HGNC Symbol;Acc:HGNC:28870]
220330_s_at	SAMSN1	1 x 43	21 q11	SAM domain, SH3 domain and nuclear localization signals 1 [Source:HGNC Symbol;Acc:HGNC:10528]
213095_x_at	AIF1	1 x 47	6 p21	allograft inflammatory factor 1 [Source:HGNC Symbol;Acc:HGNC:352]
210839_s_at	ENPP2	1 x 47	8 q24	ectonucleotide pyrophosphatase/phosphodiesterase 2 [Source:HGNC Symbol;Acc:HGNC:3357]
204039_at	CEBPA	1 x 47	19 q13	CCAAT/enhancer binding protein alpha [Source:HGNC Symbol;Acc:HGNC:1833]
201170_s_at	BHLHE40	1 x 46	3 p26	basic helix-loop-helix family member e40 [Source:HGNC Symbol;Acc:HGNC:1046]
202638_s_at	ICAM1	1 x 43	19 p13	intercellular adhesion molecule 1 [Source:HGNC Symbol;Acc:HGNC:5344]
221658_s_at	IL21R	1 x 43	16 p12	interleukin 21 receptor [Source:HGNC Symbol;Acc:HGNC:6006]
219806_s_at	SMCO4	1 x 45	11 q21	single-pass membrane protein with coiled-coil domains 4 [Source:HGNC Symbol;Acc:HGNC:24810]
208949_s_at	LGALS3	1 x 47	14 q22	galectin 3 [Source:HGNC Symbol;Acc:HGNC:6563]
211902_x_at		2 x 46
209264_s_at	TSPAN4	1 x 47	11 p15	tetraspanin 4 [Source:HGNC Symbol;Acc:HGNC:11859]
212397_at	RDX	1 x 42	11 q22	radixin [Source:HGNC Symbol;Acc:HGNC:9944]
204897_at	PTGER4	1 x 43	5 p13	prostaglandin E receptor 4 [Source:HGNC Symbol;Acc:HGNC:9596]
218627_at	DRAM1	1 x 45	12 q23	DNA damage regulated autophagy modulator 1 [Source:HGNC Symbol;Acc:HGNC:25645]
206134_at	ADAMDEC1	1 x 47	8 p21	ADAM like decysin 1 [Source:HGNC Symbol;Acc:HGNC:16299]
203473_at	SLCO2B1	1 x 47	11 q13	solute carrier organic anion transporter family member 2B1 [Source:HGNC Symbol;Acc:HGNC:10962]
204112_s_at	HNMT	1 x 48	2 q22	histamine N-methyltransferase [Source:HGNC Symbol;Acc:HGNC:5028]
AFFX-HUMISGF3A/M97935_MB_at	STAT1	1 x 43	2 q32	signal transducer and activator of transcription 1 [Source:HGNC Symbol;Acc:HGNC:11362]
215051_x_at	AIF1	1 x 47	6 p21	allograft inflammatory factor 1 [Source:HGNC Symbol;Acc:HGNC:352]
209671_x_at		1 x 46	14 q11	T-cell receptor alpha constant [Source:HGNC Symbol;Acc:HGNC:12029]
200838_at	CTSB	1 x 47	8 p23	cathepsin B [Source:HGNC Symbol;Acc:HGNC:2527]
213975_s_at	LYZ	1 x 48	12 q15	lysozyme [Source:HGNC Symbol;Acc:HGNC:6740]
202180_s_at	MVP	2 x 43	16 p11	major vault protein [Source:HGNC Symbol;Acc:HGNC:7531]
212235_at	PLXND1	1 x 48	3 q22	plexin D1 [Source:HGNC Symbol;Acc:HGNC:9107]
203547_at	CD4	1 x 47	12 p13	CD4 molecule [Source:HGNC Symbol;Acc:HGNC:1678]
210972_x_at		2 x 46	14 q11	T-cell receptor alpha constant [Source:HGNC Symbol;Acc:HGNC:12029]
209392_at	ENPP2	1 x 48	8 q24	ectonucleotide pyrophosphatase/phosphodiesterase 2 [Source:HGNC Symbol;Acc:HGNC:3357]
202803_s_at	ITGB2	1 x 46	21 q22	integrin subunit beta 2 [Source:HGNC Symbol;Acc:HGNC:6155]
205890_s_at	UBD	1 x 47	6 p22	ubiquitin D [Source:HGNC Symbol;Acc:HGNC:18795]
202688_at	TNFSF10	2 x 46	3 q26	tumor necrosis factor superfamily member 10 [Source:HGNC Symbol;Acc:HGNC:11925]
200839_s_at	CTSB	1 x 47	8 p23	cathepsin B [Source:HGNC Symbol;Acc:HGNC:2527]
202430_s_at	PLSCR1	1 x 44	3 q24	phospholipid scramblase 1 [Source:HGNC Symbol;Acc:HGNC:9092]
220532_s_at	TMEM176B	1 x 48	7 q36	transmembrane protein 176B [Source:HGNC Symbol;Acc:HGNC:29596]
218345_at	TMEM176A	1 x 47	7 q36	transmembrane protein 176A [Source:HGNC Symbol;Acc:HGNC:24930]
219506_at	C1orf54	2 x 47	1 q21	chromosome 1 open reading frame 54 [Source:HGNC Symbol;Acc:HGNC:26258]
212192_at	KCTD12	1 x 48	13 q22	potassium channel tetramerization domain containing 12 [Source:HGNC Symbol;Acc:HGNC:14678]
202446_s_at	PLSCR1	2 x 43	3 q24	phospholipid scramblase 1 [Source:HGNC Symbol;Acc:HGNC:9092]

## Sheet: Module G
ID	Symbol	Metagene	Chromosome	Description
204475_at	MMP1	2 x 50	11 q22	matrix metallopeptidase 1 [Source:HGNC Symbol;Acc:HGNC:7155]
205713_s_at	COMP	4 x 50	19 p13	cartilage oligomeric matrix protein [Source:HGNC Symbol;Acc:HGNC:2227]
210511_s_at	INHBA	3 x 50	7 p14	inhibin beta A subunit [Source:HGNC Symbol;Acc:HGNC:6066]
204051_s_at	SFRP4	4 x 50	7 p14	secreted frizzled related protein 4 [Source:HGNC Symbol;Acc:HGNC:10778]
203903_s_at	HEPH	5 x 50	X q12	hephaestin [Source:HGNC Symbol;Acc:HGNC:4866]
213790_at	ADAM12	4 x 50	10 q26	ADAM metallopeptidase domain 12 [Source:HGNC Symbol;Acc:HGNC:190]
201058_s_at	MYL9	2 x 50	20 q11	myosin light chain 9 [Source:HGNC Symbol;Acc:HGNC:15754]
215646_s_at	VCAN	2 x 50	5 q14	versican [Source:HGNC Symbol;Acc:HGNC:2464]
219087_at	ASPN	5 x 50	9 q22	asporin [Source:HGNC Symbol;Acc:HGNC:14872]
209875_s_at	SPP1	1 x 50	4 q22	secreted phosphoprotein 1 [Source:HGNC Symbol;Acc:HGNC:11255]
204017_at	KDELR3	5 x 50	22 q13	KDEL endoplasmic reticulum protein retention receptor 3 [Source:HGNC Symbol;Acc:HGNC:6306]
203854_at	CFI	6 x 50	4 q25	complement factor I [Source:HGNC Symbol;Acc:HGNC:5394]
211571_s_at	VCAN	3 x 50	5 q14	versican [Source:HGNC Symbol;Acc:HGNC:2464]
215446_s_at	LOX	3 x 50	5 q23	lysyl oxidase [Source:HGNC Symbol;Acc:HGNC:6664]
221841_s_at	KLF4	6 x 50	9 q31	Kruppel like factor 4 [Source:HGNC Symbol;Acc:HGNC:6348]
208131_s_at	PTGIS	4 x 50	20 q13	prostaglandin I2 synthase [Source:HGNC Symbol;Acc:HGNC:9603]
202555_s_at	MYLK	3 x 50	3 q21	myosin light chain kinase [Source:HGNC Symbol;Acc:HGNC:7590]
222258_s_at	SH3BP4	6 x 50	2 q37	SH3 domain binding protein 4 [Source:HGNC Symbol;Acc:HGNC:10826]
222288_at		5 x 50
206211_at	SELE	6 x 50	1 q24	selectin E [Source:HGNC Symbol;Acc:HGNC:10718]
206116_s_at	TPM1	4 x 50	15 q22	tropomyosin 1 (alpha) [Source:HGNC Symbol;Acc:HGNC:12010]
202718_at	IGFBP2	2 x 50	2 q35	insulin like growth factor binding protein 2 [Source:HGNC Symbol;Acc:HGNC:5471]
204955_at	SRPX	5 x 50	X p11	sushi repeat containing protein, X-linked [Source:HGNC Symbol;Acc:HGNC:11309]
213800_at	CFH	5 x 48	1 q31	complement factor H [Source:HGNC Symbol;Acc:HGNC:4883]
212488_at	COL5A1	3 x 50	9 q34	collagen type V alpha 1 chain [Source:HGNC Symbol;Acc:HGNC:2209]
207714_s_at	SERPINH1	2 x 50	11 q13	serpin family H member 1 [Source:HGNC Symbol;Acc:HGNC:1546]
204114_at	NID2	3 x 50	14 q22	nidogen 2 [Source:HGNC Symbol;Acc:HGNC:13389]
218469_at	GREM1	6 x 50	15 q13	gremlin 1, DAN family BMP antagonist [Source:HGNC Symbol;Acc:HGNC:2001]
213071_at	DPT	3 x 50	1 q24	dermatopontin [Source:HGNC Symbol;Acc:HGNC:3011]
209189_at	FOS	6 x 50	14 q24	Fos proto-oncogene, AP-1 transcription factor subunit [Source:HGNC Symbol;Acc:HGNC:3796]
202311_s_at	COL1A1	2 x 50	17 q21	collagen type I alpha 1 chain [Source:HGNC Symbol;Acc:HGNC:2197]
202995_s_at	FBLN1	3 x 50	22 q13	fibulin 1 [Source:HGNC Symbol;Acc:HGNC:3600]
221024_s_at	SLC2A10	6 x 50	20 q13	solute carrier family 2 member 10 [Source:HGNC Symbol;Acc:HGNC:13444]
202620_s_at	PLOD2	2 x 50	3 q24	procollagen-lysine,2-oxoglutarate 5-dioxygenase 2 [Source:HGNC Symbol;Acc:HGNC:9082]
205943_at	TDO2	3 x 50	4 q32	tryptophan 2,3-dioxygenase [Source:HGNC Symbol;Acc:HGNC:11708]
201325_s_at	EMP1	4 x 50	12 p13	epithelial membrane protein 1 [Source:HGNC Symbol;Acc:HGNC:3333]
204345_at	COL16A1	4 x 50	1 p35	collagen type XVI alpha 1 chain [Source:HGNC Symbol;Acc:HGNC:2193]
209758_s_at	MFAP5	3 x 50	12 p13	microfibrillar associated protein 5 [Source:HGNC Symbol;Acc:HGNC:29673]
204083_s_at	TPM2	3 x 50	9 p13	tropomyosin 2 (beta) [Source:HGNC Symbol;Acc:HGNC:12011]
211564_s_at	PDLIM4	5 x 49	5 q31	PDZ and LIM domain 4 [Source:HGNC Symbol;Acc:HGNC:16501]
201860_s_at	PLAT	4 x 50	8 p11	plasminogen activator, tissue type [Source:HGNC Symbol;Acc:HGNC:9051]
204619_s_at	VCAN	4 x 50	5 q14	versican [Source:HGNC Symbol;Acc:HGNC:2464]
220952_s_at	PLEKHA5	6 x 50	12 p12	pleckstrin homology domain containing A5 [Source:HGNC Symbol;Acc:HGNC:30036]
203325_s_at	COL5A1	3 x 50	9 q34	collagen type V alpha 1 chain [Source:HGNC Symbol;Acc:HGNC:2209]
202133_at	WWTR1	5 x 50	3 q25	WW domain containing transcription regulator 1 [Source:HGNC Symbol;Acc:HGNC:24042]
204150_at	STAB1	5 x 49	3 p21	stabilin 1 [Source:HGNC Symbol;Acc:HGNC:18628]
201787_at	FBLN1	4 x 50	22 q13	fibulin 1 [Source:HGNC Symbol;Acc:HGNC:3600]
221731_x_at	VCAN	2 x 50	5 q14	versican [Source:HGNC Symbol;Acc:HGNC:2464]
212344_at	SULF1	2 x 50	8 q13	sulfatase 1 [Source:HGNC Symbol;Acc:HGNC:20391]
202994_s_at	FBLN1	4 x 50	22 q13	fibulin 1 [Source:HGNC Symbol;Acc:HGNC:3600]
219410_at	TMEM45A	4 x 50	3 q12	transmembrane protein 45A [Source:HGNC Symbol;Acc:HGNC:25480]
208029_s_at	LAPTM4B	6 x 50	8 q22	lysosomal protein transmembrane 4 beta [Source:HGNC Symbol;Acc:HGNC:13646]
215034_s_at	TM4SF1	6 x 50	3 q25	transmembrane 4 L six family member 1 [Source:HGNC Symbol;Acc:HGNC:11853]
217430_x_at		3 x 50
210762_s_at	DLC1	5 x 50	8 p22	DLC1 Rho GTPase activating protein [Source:HGNC Symbol;Acc:HGNC:2897]
202619_s_at	PLOD2	4 x 50	3 q24	procollagen-lysine,2-oxoglutarate 5-dioxygenase 2 [Source:HGNC Symbol;Acc:HGNC:9082]
218162_at	HIPK1	4 x 50	1 p13	homeodomain interacting protein kinase 1 [Source:HGNC Symbol;Acc:HGNC:19006]
212233_at	MAP1B	5 x 50	5 q13	microtubule associated protein 1B [Source:HGNC Symbol;Acc:HGNC:6836]
209209_s_at	FERMT2	5 x 50	14 q22	fermitin family member 2 [Source:HGNC Symbol;Acc:HGNC:15767]
205573_s_at	SNX7	5 x 50	1 p21	sorting nexin 7 [Source:HGNC Symbol;Acc:HGNC:14971]
201324_at	EMP1	3 x 50	12 p13	epithelial membrane protein 1 [Source:HGNC Symbol;Acc:HGNC:3333]
204620_s_at	VCAN	2 x 50	5 q14	versican [Source:HGNC Symbol;Acc:HGNC:2464]
203851_at	IGFBP6	5 x 50	12 q13	insulin like growth factor binding protein 6 [Source:HGNC Symbol;Acc:HGNC:5475]
202310_s_at	COL1A1	1 x 50	17 q21	collagen type I alpha 1 chain [Source:HGNC Symbol;Acc:HGNC:2197]
202952_s_at	ADAM12	3 x 50	10 q26	ADAM metallopeptidase domain 12 [Source:HGNC Symbol;Acc:HGNC:190]
201616_s_at	CALD1	2 x 50	7 q33	caldesmon 1 [Source:HGNC Symbol;Acc:HGNC:1441]
202628_s_at	SERPINE1	2 x 50	7 q22	serpin family E member 1 [Source:HGNC Symbol;Acc:HGNC:8583]
209955_s_at	FAP	3 x 50	2 q24	fibroblast activation protein alpha [Source:HGNC Symbol;Acc:HGNC:3590]
202435_s_at	CYP1B1	2 x 49	2 p22	cytochrome P450 family 1 subfamily B member 1 [Source:HGNC Symbol;Acc:HGNC:2597]
212473_s_at	MICAL2	3 x 49	11 p15	microtubule associated monooxygenase, calponin and LIM domain containing 2 [Source:HGNC Symbol;Acc:HGNC:24693]
201843_s_at	EFEMP1	5 x 50	2 p16	EGF containing fibulin like extracellular matrix protein 1 [Source:HGNC Symbol;Acc:HGNC:3218]
212353_at	SULF1	2 x 50	8 q13	sulfatase 1 [Source:HGNC Symbol;Acc:HGNC:20391]
38487_at	STAB1	5 x 48	3 p21	stabilin 1 [Source:HGNC Symbol;Acc:HGNC:18628]
210809_s_at	POSTN	1 x 50	13 q13	periostin [Source:HGNC Symbol;Acc:HGNC:16953]
204115_at	GNG11	6 x 50	7 q21	G protein subunit gamma 11 [Source:HGNC Symbol;Acc:HGNC:4403]
208790_s_at	PTRF	5 x 50	17 q21	polymerase I and transcript release factor [Source:HGNC Symbol;Acc:HGNC:9688]
209487_at	RBPMS	5 x 50	8 p12	RNA binding protein with multiple splicing [Source:HGNC Symbol;Acc:HGNC:19097]
212724_at	RND3	2 x 48	2 q23	Rho family GTPase 3 [Source:HGNC Symbol;Acc:HGNC:671]
209356_x_at	EFEMP2	4 x 50	11 q13	EGF containing fibulin like extracellular matrix protein 2 [Source:HGNC Symbol;Acc:HGNC:3219]
201431_s_at	DPYSL3	2 x 50	5 q32	dihydropyrimidinase like 3 [Source:HGNC Symbol;Acc:HGNC:3015]
209596_at	MXRA5	1 x 50	X p22	matrix remodeling associated 5 [Source:HGNC Symbol;Acc:HGNC:7539]
207265_s_at	KDELR3	5 x 50	22 q13	KDEL endoplasmic reticulum protein retention receptor 3 [Source:HGNC Symbol;Acc:HGNC:6306]
221730_at	COL5A2	2 x 50	2 q32	collagen type V alpha 2 chain [Source:HGNC Symbol;Acc:HGNC:2210]
201125_s_at	ITGB5	4 x 50	3 q21	integrin subunit beta 5 [Source:HGNC Symbol;Acc:HGNC:6160]
207191_s_at	ISLR	3 x 50	15 q24	immunoglobulin superfamily containing leucine rich repeat [Source:HGNC Symbol;Acc:HGNC:6133]
205547_s_at	TAGLN	3 x 50	11 q23	transgelin [Source:HGNC Symbol;Acc:HGNC:11553]
204589_at	NUAK1	5 x 50	12 q23	NUAK family kinase 1 [Source:HGNC Symbol;Acc:HGNC:14311]
213423_x_at	TUSC3	6 x 49	8 p22	tumor suppressor candidate 3 [Source:HGNC Symbol;Acc:HGNC:30242]
210987_x_at	TPM1	4 x 50	15 q22	tropomyosin 1 (alpha) [Source:HGNC Symbol;Acc:HGNC:12010]
208767_s_at	LAPTM4B	6 x 50	8 q22	lysosomal protein transmembrane 4 beta [Source:HGNC Symbol;Acc:HGNC:13646]
209101_at	CTGF	2 x 50	6 q23	connective tissue growth factor [Source:HGNC Symbol;Acc:HGNC:2500]
213905_x_at	BGN	2 x 50	X q28	biglycan [Source:HGNC Symbol;Acc:HGNC:1044]
204468_s_at	TIE1	6 x 50	1 p34	tyrosine kinase with immunoglobulin like and EGF like domains 1 [Source:HGNC Symbol;Acc:HGNC:11809]
212942_s_at	CEMIP	5 x 50	15 q25	cell migration inducing hyaluronan binding protein [Source:HGNC Symbol;Acc:HGNC:29213]
212294_at	GNG12	6 x 50	1 p31	G protein subunit gamma 12 [Source:HGNC Symbol;Acc:HGNC:19663]
204879_at	PDPN	3 x 50	1 p36	podoplanin [Source:HGNC Symbol;Acc:HGNC:29602]
222162_s_at	ADAMTS1	5 x 50	21 q21	ADAM metallopeptidase with thrombospondin type 1 motif 1 [Source:HGNC Symbol;Acc:HGNC:217]
211668_s_at	PLAU	1 x 49	10 q22	plasminogen activator, urokinase [Source:HGNC Symbol;Acc:HGNC:9052]
219489_s_at	NXN	4 x 50	17 p13	nucleoredoxin [Source:HGNC Symbol;Acc:HGNC:18008]
202409_at	IGF2	5 x 50	11 p15	insulin like growth factor 2 [Source:HGNC Symbol;Acc:HGNC:5466]
210517_s_at	AKAP12	5 x 49	6 q25	A-kinase anchoring protein 12 [Source:HGNC Symbol;Acc:HGNC:370]
202709_at	FMOD	6 x 49	1 q32	fibromodulin [Source:HGNC Symbol;Acc:HGNC:3774]
205100_at	GFPT2	3 x 50	5 q35	glutamine-fructose-6-phosphate transaminase 2 [Source:HGNC Symbol;Acc:HGNC:4242]
209210_s_at	FERMT2	4 x 50	14 q22	fermitin family member 2 [Source:HGNC Symbol;Acc:HGNC:15767]
212489_at	COL5A1	3 x 50	9 q34	collagen type V alpha 1 chain [Source:HGNC Symbol;Acc:HGNC:2209]
203083_at	THBS2	3 x 50	6 q27	thrombospondin 2 [Source:HGNC Symbol;Acc:HGNC:11786]
202765_s_at	FBN1	3 x 50	15 q21	fibrillin 1 [Source:HGNC Symbol;Acc:HGNC:3603]
205479_s_at	PLAU	1 x 49	10 q22	plasminogen activator, urokinase [Source:HGNC Symbol;Acc:HGNC:9052]
209656_s_at	TMEM47	3 x 50	X p21	transmembrane protein 47 [Source:HGNC Symbol;Acc:HGNC:18515]
203131_at	PDGFRA	3 x 50	4 q12	platelet derived growth factor receptor alpha [Source:HGNC Symbol;Acc:HGNC:8803]
204518_s_at	PPIC	5 x 50	5 q23	peptidylprolyl isomerase C [Source:HGNC Symbol;Acc:HGNC:9256]
202404_s_at	COL1A2	1 x 50	7 q21	collagen type I alpha 2 chain [Source:HGNC Symbol;Acc:HGNC:2198]
212012_at	PXDN	4 x 50	2 p25	peroxidasin [Source:HGNC Symbol;Acc:HGNC:14966]
210986_s_at	TPM1	2 x 50	15 q22	tropomyosin 1 (alpha) [Source:HGNC Symbol;Acc:HGNC:12010]
209621_s_at	PDLIM3	5 x 50	4 q35	PDZ and LIM domain 3 [Source:HGNC Symbol;Acc:HGNC:20767]
201792_at	AEBP1	4 x 50	7 p13	AE binding protein 1 [Source:HGNC Symbol;Acc:HGNC:303]
202238_s_at	NNMT	2 x 50	11 q23	nicotinamide N-methyltransferase [Source:HGNC Symbol;Acc:HGNC:7861]
212937_s_at	COL6A1	3 x 50	21 q22	collagen type VI alpha 1 chain [Source:HGNC Symbol;Acc:HGNC:2211]
213869_x_at	THY1	3 x 50	11 q23	Thy-1 cell surface antigen [Source:HGNC Symbol;Acc:HGNC:11801]
203323_at	CAV2	6 x 50	7 q31	caveolin 2 [Source:HGNC Symbol;Acc:HGNC:1528]
211966_at	COL4A2	1 x 50	13 q34	collagen type IV alpha 2 chain [Source:HGNC Symbol;Acc:HGNC:2203]
201110_s_at	THBS1	4 x 50	15 q14	thrombospondin 1 [Source:HGNC Symbol;Acc:HGNC:11785]
219134_at	ADGRL4	5 x 50	1 p31	adhesion G protein-coupled receptor L4 [Source:HGNC Symbol;Acc:HGNC:20822]
201261_x_at	BGN	2 x 50	X q28	biglycan [Source:HGNC Symbol;Acc:HGNC:1044]
212950_at	ADGRF5	4 x 50	6 p12	adhesion G protein-coupled receptor F5 [Source:HGNC Symbol;Acc:HGNC:19030]
210139_s_at	PMP22	1 x 50	17 p12	peripheral myelin protein 22 [Source:HGNC Symbol;Acc:HGNC:9118]
209651_at	TGFB1I1	4 x 50	16 p11	transforming growth factor beta 1 induced transcript 1 [Source:HGNC Symbol;Acc:HGNC:11767]
207977_s_at	DPT	1 x 50	1 q24	dermatopontin [Source:HGNC Symbol;Acc:HGNC:3011]
204570_at	COX7A1	5 x 50	19 q13	cytochrome c oxidase subunit 7A1 [Source:HGNC Symbol;Acc:HGNC:2287]
201506_at	TGFBI	1 x 49	5 q31	transforming growth factor beta induced [Source:HGNC Symbol;Acc:HGNC:11771]
204163_at	EMILIN1	2 x 50	2 p23	elastin microfibril interfacer 1 [Source:HGNC Symbol;Acc:HGNC:19880]
201579_at	FAT1	5 x 50	4 q35	FAT atypical cadherin 1 [Source:HGNC Symbol;Acc:HGNC:3595]
201149_s_at	TIMP3	2 x 50	22 q12	TIMP metallopeptidase inhibitor 3 [Source:HGNC Symbol;Acc:HGNC:11822]
212254_s_at	DST	6 x 49	6 p12	dystonin [Source:HGNC Symbol;Acc:HGNC:1090]
204975_at	EMP2	5 x 50	16 p13	epithelial membrane protein 2 [Source:HGNC Symbol;Acc:HGNC:3334]
209488_s_at	RBPMS	5 x 50	8 p12	RNA binding protein with multiple splicing [Source:HGNC Symbol;Acc:HGNC:19097]
203180_at	ALDH1A3	4 x 50	15 q26	aldehyde dehydrogenase 1 family member A3 [Source:HGNC Symbol;Acc:HGNC:409]
221541_at	CRISPLD2	3 x 50	16 q24	cysteine rich secretory protein LCCL domain containing 2 [Source:HGNC Symbol;Acc:HGNC:25248]
202007_at	NID1	3 x 50	1 q42	nidogen 1 [Source:HGNC Symbol;Acc:HGNC:7821]
212091_s_at	COL6A1	1 x 50	21 q22	collagen type VI alpha 1 chain [Source:HGNC Symbol;Acc:HGNC:2211]
221898_at	PDPN	3 x 50	1 p36	podoplanin [Source:HGNC Symbol;Acc:HGNC:29602]
202766_s_at	FBN1	1 x 50	15 q21	fibrillin 1 [Source:HGNC Symbol;Acc:HGNC:3603]
221729_at	COL5A2	1 x 50	2 q32	collagen type V alpha 2 chain [Source:HGNC Symbol;Acc:HGNC:2210]
204682_at	LTBP2	3 x 50	14 q24	latent transforming growth factor beta binding protein 2 [Source:HGNC Symbol;Acc:HGNC:6715]
218718_at	PDGFC	4 x 50	4 q32	platelet derived growth factor C [Source:HGNC Symbol;Acc:HGNC:8801]
216264_s_at	LAMB2	6 x 49	3 p21	laminin subunit beta 2 [Source:HGNC Symbol;Acc:HGNC:6487]
202609_at	EPS8	5 x 50	12 p12	epidermal growth factor receptor pathway substrate 8 [Source:HGNC Symbol;Acc:HGNC:3420]
212154_at	SDC2	5 x 50	8 q22	syndecan 2 [Source:HGNC Symbol;Acc:HGNC:10659]
201012_at	ANXA1	1 x 49	9 q21	annexin A1 [Source:HGNC Symbol;Acc:HGNC:533]
212158_at	SDC2	5 x 50	8 q22	syndecan 2 [Source:HGNC Symbol;Acc:HGNC:10659]
201505_at	LAMB1	3 x 50	7 q31	laminin subunit beta 1 [Source:HGNC Symbol;Acc:HGNC:6486]
210764_s_at	CYR61	4 x 50	1 p22	cysteine rich angiogenic inducer 61 [Source:HGNC Symbol;Acc:HGNC:2654]
202202_s_at	LAMA4	3 x 50	6 q21	laminin subunit alpha 4 [Source:HGNC Symbol;Acc:HGNC:6484]
203238_s_at	NOTCH3	4 x 50	19 p13	notch 3 [Source:HGNC Symbol;Acc:HGNC:7883]
201508_at	IGFBP4	1 x 50	17 q21	insulin like growth factor binding protein 4 [Source:HGNC Symbol;Acc:HGNC:5473]
209094_at	DDAH1	3 x 50	1 p22	dimethylarginine dimethylaminohydrolase 1 [Source:HGNC Symbol;Acc:HGNC:2715]
213943_at	TWIST1	5 x 50	7 p21	twist family bHLH transcription factor 1 [Source:HGNC Symbol;Acc:HGNC:12428]
211651_s_at	LAMB1	3 x 50	7 q31	laminin subunit beta 1 [Source:HGNC Symbol;Acc:HGNC:6486]
213068_at	DPT	2 x 50	1 q24	dermatopontin [Source:HGNC Symbol;Acc:HGNC:3011]
218541_s_at	C8orf4	6 x 50	8 p11	chromosome 8 open reading frame 4 [Source:HGNC Symbol;Acc:HGNC:1357]
208850_s_at	THY1	1 x 50	11 q23	Thy-1 cell surface antigen [Source:HGNC Symbol;Acc:HGNC:11801]
210830_s_at	PON2	6 x 50	7 q21	paraoxonase 2 [Source:HGNC Symbol;Acc:HGNC:9205]
204457_s_at	GAS1	2 x 50	9 q21	growth arrest specific 1 [Source:HGNC Symbol;Acc:HGNC:4165]
212298_at	NRP1	4 x 50	10 p11	neuropilin 1 [Source:HGNC Symbol;Acc:HGNC:8004]
201445_at	CNN3	4 x 50	1 p21	calponin 3 [Source:HGNC Symbol;Acc:HGNC:2157]
213125_at	OLFML2B	1 x 50	1 q23	olfactomedin like 2B [Source:HGNC Symbol;Acc:HGNC:24558]
213001_at	ANGPTL2	4 x 50	9 q33	angiopoietin like 2 [Source:HGNC Symbol;Acc:HGNC:490]
211161_s_at	COL3A1	1 x 50	2 q32	collagen type III alpha 1 chain [Source:HGNC Symbol;Acc:HGNC:2201]
221019_s_at	COLEC12	4 x 50	18 p11	collectin subfamily member 12 [Source:HGNC Symbol;Acc:HGNC:16016]
211160_x_at	ACTN1	1 x 50	14 q24	actinin alpha 1 [Source:HGNC Symbol;Acc:HGNC:163]
201842_s_at	EFEMP1	1 x 50	2 p16	EGF containing fibulin like extracellular matrix protein 1 [Source:HGNC Symbol;Acc:HGNC:3218]
201430_s_at	DPYSL3	4 x 50	5 q32	dihydropyrimidinase like 3 [Source:HGNC Symbol;Acc:HGNC:3015]
201744_s_at	LUM	1 x 50	12 q21	lumican [Source:HGNC Symbol;Acc:HGNC:6724]
201852_x_at	COL3A1	1 x 50	2 q32	collagen type III alpha 1 chain [Source:HGNC Symbol;Acc:HGNC:2201]
201148_s_at	TIMP3	3 x 50	22 q12	TIMP metallopeptidase inhibitor 3 [Source:HGNC Symbol;Acc:HGNC:11822]
213909_at	LRRC15	4 x 50	3 q29	leucine rich repeat containing 15 [Source:HGNC Symbol;Acc:HGNC:20818]
212354_at	SULF1	3 x 50	8 q13	sulfatase 1 [Source:HGNC Symbol;Acc:HGNC:20391]
212143_s_at	IGFBP3	1 x 50	7 p12	insulin like growth factor binding protein 3 [Source:HGNC Symbol;Acc:HGNC:5472]
209387_s_at	TM4SF1	6 x 50	3 q25	transmembrane 4 L six family member 1 [Source:HGNC Symbol;Acc:HGNC:11853]
216268_s_at	JAG1	6 x 50	20 p12	jagged 1 [Source:HGNC Symbol;Acc:HGNC:6188]
204464_s_at	EDNRA	5 x 50	4 q31	endothelin receptor type A [Source:HGNC Symbol;Acc:HGNC:3179]
201667_at	GJA1	1 x 50	6 q22	gap junction protein alpha 1 [Source:HGNC Symbol;Acc:HGNC:4274]
202291_s_at	MGP	4 x 50	12 p12	matrix Gla protein [Source:HGNC Symbol;Acc:HGNC:7060]
202403_s_at	COL1A2	1 x 50	7 q21	collagen type I alpha 2 chain [Source:HGNC Symbol;Acc:HGNC:2198]
202436_s_at	CYP1B1	1 x 49	2 p22	cytochrome P450 family 1 subfamily B member 1 [Source:HGNC Symbol;Acc:HGNC:2597]
201278_at	DAB2	3 x 48	5 p13	DAB2, clathrin adaptor protein [Source:HGNC Symbol;Acc:HGNC:2662]
211535_s_at	FGFR1	3 x 50	8 p11	fibroblast growth factor receptor 1 [Source:HGNC Symbol;Acc:HGNC:3688]
209335_at	DCN	4 x 50	12 q21	decorin [Source:HGNC Symbol;Acc:HGNC:2705]
211896_s_at	DCN	2 x 50	12 q21	decorin [Source:HGNC Symbol;Acc:HGNC:2705]
209386_at	TM4SF1	6 x 50	3 q25	transmembrane 4 L six family member 1 [Source:HGNC Symbol;Acc:HGNC:11853]
202458_at	PRSS23	2 x 50	11 q14	protease, serine 23 [Source:HGNC Symbol;Acc:HGNC:14370]
201631_s_at	IER3	4 x 48	6 p21	immediate early response 3 [Source:HGNC Symbol;Acc:HGNC:5392]
209946_at	VEGFC	5 x 48	4 q34	vascular endothelial growth factor C [Source:HGNC Symbol;Acc:HGNC:12682]
202949_s_at	FHL2	3 x 50	2 q12	four and a half LIM domains 2 [Source:HGNC Symbol;Acc:HGNC:3703]
217890_s_at	PARVA	6 x 50	11 p15	parvin alpha [Source:HGNC Symbol;Acc:HGNC:14652]
207173_x_at	CDH11	1 x 50	16 q21	cadherin 11 [Source:HGNC Symbol;Acc:HGNC:1750]
201005_at	CD9	4 x 50	12 p13	CD9 molecule [Source:HGNC Symbol;Acc:HGNC:1709]
201262_s_at	BGN	2 x 50	X q28	biglycan [Source:HGNC Symbol;Acc:HGNC:1044]
202237_at	NNMT	3 x 50	11 q23	nicotinamide N-methyltransferase [Source:HGNC Symbol;Acc:HGNC:7861]
201785_at	RNASE1	6 x 50	14 q11	ribonuclease A family member 1, pancreatic [Source:HGNC Symbol;Acc:HGNC:10044]
220088_at	C5AR1	2 x 48	19 q13	complement C5a receptor 1 [Source:HGNC Symbol;Acc:HGNC:1338]
200907_s_at	PALLD	1 x 49	4 q32	palladin, cytoskeletal associated protein [Source:HGNC Symbol;Acc:HGNC:17068]
214247_s_at	DKK3	6 x 50	11 p15	dickkopf WNT signaling pathway inhibitor 3 [Source:HGNC Symbol;Acc:HGNC:2893]
213139_at	SNAI2	3 x 50	8 q11	snail family transcriptional repressor 2 [Source:HGNC Symbol;Acc:HGNC:11094]
204677_at	CDH5	6 x 50	16 q21	cadherin 5 [Source:HGNC Symbol;Acc:HGNC:1764]
217897_at	FXYD6	3 x 48	11 q23	FXYD domain containing ion transport regulator 6 [Source:HGNC Symbol;Acc:HGNC:4030]
221748_s_at	TNS1	4 x 49	2 q35	tensin 1 [Source:HGNC Symbol;Acc:HGNC:11973]
201069_at	MMP2	1 x 50	16 q12	matrix metallopeptidase 2 [Source:HGNC Symbol;Acc:HGNC:7166]
212977_at	ACKR3	4 x 50	2 q37	atypical chemokine receptor 3 [Source:HGNC Symbol;Acc:HGNC:23692]
202877_s_at	CD93	6 x 49	20 p11	CD93 molecule [Source:HGNC Symbol;Acc:HGNC:15855]
202465_at	PCOLCE	3 x 50	7 q22	procollagen C-endopeptidase enhancer [Source:HGNC Symbol;Acc:HGNC:8738]
212077_at	CALD1	1 x 50	7 q33	caldesmon 1 [Source:HGNC Symbol;Acc:HGNC:1441]
201147_s_at	TIMP3	3 x 50	22 q12	TIMP metallopeptidase inhibitor 3 [Source:HGNC Symbol;Acc:HGNC:11822]
212464_s_at	FN1	1 x 50	2 q35	fibronectin 1 [Source:HGNC Symbol;Acc:HGNC:3778]
201617_x_at	CALD1	3 x 50	7 q33	caldesmon 1 [Source:HGNC Symbol;Acc:HGNC:1441]
215076_s_at	COL3A1	1 x 50	2 q32	collagen type III alpha 1 chain [Source:HGNC Symbol;Acc:HGNC:2201]
37005_at	MINOS1-NBL1	3 x 50	1 p36	MINOS1-NBL1 readthrough [Source:HGNC Symbol;Acc:HGNC:48338]
208637_x_at	ACTN1	1 x 49	14 q24	actinin alpha 1 [Source:HGNC Symbol;Acc:HGNC:163]
214039_s_at	LAPTM4B	5 x 50	8 q22	lysosomal protein transmembrane 4 beta [Source:HGNC Symbol;Acc:HGNC:13646]
202437_s_at	CYP1B1	1 x 49	2 p22	cytochrome P450 family 1 subfamily B member 1 [Source:HGNC Symbol;Acc:HGNC:2597]
209082_s_at	COL18A1	5 x 50	21 q22	collagen type XVIII alpha 1 chain [Source:HGNC Symbol;Acc:HGNC:2195]
211813_x_at	DCN	2 x 50	12 q21	decorin [Source:HGNC Symbol;Acc:HGNC:2705]
204517_at	PPIC	5 x 50	5 q23	peptidylprolyl isomerase C [Source:HGNC Symbol;Acc:HGNC:9256]
201289_at	CYR61	1 x 50	1 p22	cysteine rich angiogenic inducer 61 [Source:HGNC Symbol;Acc:HGNC:2654]
207808_s_at	PROS1	5 x 50	3 q11	protein S (alpha) [Source:HGNC Symbol;Acc:HGNC:9456]
207172_s_at	CDH11	5 x 50	16 q21	cadherin 11 [Source:HGNC Symbol;Acc:HGNC:1750]
201655_s_at	HSPG2	4 x 50	1 p36	heparan sulfate proteoglycan 2 [Source:HGNC Symbol;Acc:HGNC:5273]
201876_at	PON2	6 x 50	7 q21	paraoxonase 2 [Source:HGNC Symbol;Acc:HGNC:9205]
202273_at	PDGFRB	4 x 50	5 q32	platelet derived growth factor receptor beta [Source:HGNC Symbol;Acc:HGNC:8804]
209355_s_at	PLPP3	1 x 49	1 p32	phospholipid phosphatase 3 [Source:HGNC Symbol;Acc:HGNC:9229]
210495_x_at	FN1	1 x 50	2 q35	fibronectin 1 [Source:HGNC Symbol;Acc:HGNC:3778]
210815_s_at	CALCRL	6 x 50	2 q32	calcitonin receptor like receptor [Source:HGNC Symbol;Acc:HGNC:16709]
211719_x_at	FN1	1 x 50	2 q35	fibronectin 1 [Source:HGNC Symbol;Acc:HGNC:3778]
215388_s_at	CFH	5 x 48	1 q31	complement factor H [Source:HGNC Symbol;Acc:HGNC:4883]
200974_at	ACTA2	3 x 50	10 q23	actin, alpha 2, smooth muscle, aorta [Source:HGNC Symbol;Acc:HGNC:130]
202052_s_at	RAI14	1 x 50	5 p13	retinoic acid induced 14 [Source:HGNC Symbol;Acc:HGNC:14873]
209684_at	RIN2	1 x 49	20 p11	Ras and Rab interactor 2 [Source:HGNC Symbol;Acc:HGNC:18750]
208851_s_at	THY1	4 x 50	11 q23	Thy-1 cell surface antigen [Source:HGNC Symbol;Acc:HGNC:11801]
209099_x_at	JAG1	6 x 50	20 p12	jagged 1 [Source:HGNC Symbol;Acc:HGNC:6188]
211959_at	IGFBP5	4 x 50	2 q35	insulin like growth factor binding protein 5 [Source:HGNC Symbol;Acc:HGNC:5474]
202878_s_at	CD93	4 x 50	20 p11	CD93 molecule [Source:HGNC Symbol;Acc:HGNC:15855]
203477_at	COL15A1	1 x 50	9 q22	collagen type XV alpha 1 chain [Source:HGNC Symbol;Acc:HGNC:2192]
213290_at	COL6A2	4 x 50	21 q22	collagen type VI alpha 2 chain [Source:HGNC Symbol;Acc:HGNC:2212]
209526_s_at	HDGFRP3	4 x 48	15 q25	Hepatoma-derived growth factor-related protein 3 [Source:UniProtKB/Swiss-Prot;Acc:Q9Y3E1]
201215_at	PLS3	3 x 50	X q23	plastin 3 [Source:HGNC Symbol;Acc:HGNC:9091]
209156_s_at	COL6A2	1 x 50	21 q22	collagen type VI alpha 2 chain [Source:HGNC Symbol;Acc:HGNC:2212]
216442_x_at	FN1	1 x 50	2 q35	fibronectin 1 [Source:HGNC Symbol;Acc:HGNC:3778]
201185_at	HTRA1	5 x 50	10 q26	HtrA serine peptidase 1 [Source:HGNC Symbol;Acc:HGNC:9476]
217525_at	OLFML1	6 x 49	11 p15	olfactomedin like 1 [Source:HGNC Symbol;Acc:HGNC:24473]
210869_s_at	MCAM	5 x 50	11 q23	melanoma cell adhesion molecule [Source:HGNC Symbol;Acc:HGNC:6934]
203324_s_at	CAV2	5 x 50	7 q31	caveolin 2 [Source:HGNC Symbol;Acc:HGNC:1528]
201645_at	TNC	1 x 49	9 q33	tenascin C [Source:HGNC Symbol;Acc:HGNC:5318]
213455_at	FAM114A1	5 x 49	4 p14	family with sequence similarity 114 member A1 [Source:HGNC Symbol;Acc:HGNC:25087]
203476_at	TPBG	5 x 50	6 q14	trophoblast glycoprotein [Source:HGNC Symbol;Acc:HGNC:12004]
209524_at	HDGFRP3	4 x 48	15 q25	Hepatoma-derived growth factor-related protein 3 [Source:UniProtKB/Swiss-Prot;Acc:Q9Y3E1]
202011_at	TJP1	6 x 50	15 q13	tight junction protein 1 [Source:HGNC Symbol;Acc:HGNC:11827]
202450_s_at	CTSK	1 x 50	1 q21	cathepsin K [Source:HGNC Symbol;Acc:HGNC:2536]
200602_at	APP	5 x 48	21 q21	amyloid beta precursor protein [Source:HGNC Symbol;Acc:HGNC:620]
212364_at	MYO1B	6 x 50	2 q32	myosin IB [Source:HGNC Symbol;Acc:HGNC:7596]
201150_s_at	TIMP3	1 x 50	22 q12	TIMP metallopeptidase inhibitor 3 [Source:HGNC Symbol;Acc:HGNC:11822]
217767_at	C3	1 x 49	19 p13	complement C3 [Source:HGNC Symbol;Acc:HGNC:1318]
201280_s_at	DAB2	4 x 48	5 p13	DAB2, clathrin adaptor protein [Source:HGNC Symbol;Acc:HGNC:2662]
209543_s_at	CD34	6 x 50	1 q32	CD34 molecule [Source:HGNC Symbol;Acc:HGNC:1662]
203570_at	LOXL1	1 x 49	15 q24	lysyl oxidase like 1 [Source:HGNC Symbol;Acc:HGNC:6665]
203065_s_at	CAV1	5 x 50	7 q31	caveolin 1 [Source:HGNC Symbol;Acc:HGNC:1527]
212509_s_at	MXRA7	4 x 48	17 q25	matrix remodeling associated 7 [Source:HGNC Symbol;Acc:HGNC:7541]
208782_at	FSTL1	1 x 50	3 q13	follistatin like 1 [Source:HGNC Symbol;Acc:HGNC:3972]
201893_x_at	DCN	3 x 50	12 q21	decorin [Source:HGNC Symbol;Acc:HGNC:2705]
213010_at	PRKCDBP	5 x 50	11 p15	protein kinase C delta binding protein [Source:HGNC Symbol;Acc:HGNC:9400]
203060_s_at	PAPSS2	1 x 49	10 q23	3'-phosphoadenosine 5'-phosphosulfate synthase 2 [Source:HGNC Symbol;Acc:HGNC:8604]
203411_s_at	LMNA	5 x 48	1 q22	lamin A/C [Source:HGNC Symbol;Acc:HGNC:6636]
214880_x_at		1 x 50
212097_at	CAV1	3 x 50	7 q31	caveolin 1 [Source:HGNC Symbol;Acc:HGNC:1527]
210757_x_at	DAB2	2 x 48	5 p13	DAB2, clathrin adaptor protein [Source:HGNC Symbol;Acc:HGNC:2662]
211964_at	COL4A2	1 x 50	13 q34	collagen type IV alpha 2 chain [Source:HGNC Symbol;Acc:HGNC:2203]
221872_at	RARRES1	1 x 49	3 q25	retinoic acid receptor responder 1 [Source:HGNC Symbol;Acc:HGNC:9867]
200897_s_at	PALLD	2 x 49	4 q32	palladin, cytoskeletal associated protein [Source:HGNC Symbol;Acc:HGNC:17068]
213428_s_at	COL6A1	1 x 50	21 q22	collagen type VI alpha 1 chain [Source:HGNC Symbol;Acc:HGNC:2211]
212230_at	PLPP3	3 x 48	1 p32	phospholipid phosphatase 3 [Source:HGNC Symbol;Acc:HGNC:9229]
212667_at	SPARC	1 x 50	5 q33	secreted protein acidic and cysteine rich [Source:HGNC Symbol;Acc:HGNC:11219]
212365_at	MYO1B	5 x 50	2 q32	myosin IB [Source:HGNC Symbol;Acc:HGNC:7596]
209496_at	RARRES2	1 x 49	7 q36	retinoic acid receptor responder 2 [Source:HGNC Symbol;Acc:HGNC:9868]
201438_at	COL6A3	1 x 50	2 q37	collagen type VI alpha 3 chain [Source:HGNC Symbol;Acc:HGNC:2213]
209183_s_at	C10orf10	2 x 48	10 q11	chromosome 10 open reading frame 10 [Source:HGNC Symbol;Acc:HGNC:23355]
209087_x_at	MCAM	5 x 50	11 q23	melanoma cell adhesion molecule [Source:HGNC Symbol;Acc:HGNC:6934]
201666_at	TIMP1	1 x 50	X p11	TIMP metallopeptidase inhibitor 1 [Source:HGNC Symbol;Acc:HGNC:11820]
200878_at	EPAS1	1 x 50	2 p21	endothelial PAS domain protein 1 [Source:HGNC Symbol;Acc:HGNC:3374]
217757_at	A2M	1 x 49	12 p13	alpha-2-macroglobulin [Source:HGNC Symbol;Acc:HGNC:7]
201279_s_at	DAB2	2 x 48	5 p13	DAB2, clathrin adaptor protein [Source:HGNC Symbol;Acc:HGNC:2662]
210095_s_at	IGFBP3	1 x 50	7 p12	insulin like growth factor binding protein 3 [Source:HGNC Symbol;Acc:HGNC:5472]
202112_at	VWF	1 x 50	12 p13	von Willebrand factor [Source:HGNC Symbol;Acc:HGNC:12726]
202351_at	ITGAV	3 x 50	2 q32	integrin subunit alpha V [Source:HGNC Symbol;Acc:HGNC:6150]
202948_at	IL1R1	2 x 50	2 q11	interleukin 1 receptor type 1 [Source:HGNC Symbol;Acc:HGNC:5993]
217892_s_at	LIMA1	5 x 48	12 q13	LIM domain and actin binding 1 [Source:HGNC Symbol;Acc:HGNC:24636]
200795_at	SPARCL1	1 x 50	4 q22	SPARC like 1 [Source:HGNC Symbol;Acc:HGNC:11220]
211980_at	COL4A1	2 x 50	13 q34	collagen type IV alpha 1 chain [Source:HGNC Symbol;Acc:HGNC:2202]
212226_s_at	PLPP3	4 x 48	1 p32	phospholipid phosphatase 3 [Source:HGNC Symbol;Acc:HGNC:9229]
201621_at	MINOS1-NBL1	3 x 50	1 p36	MINOS1-NBL1 readthrough [Source:HGNC Symbol;Acc:HGNC:48338]
200665_s_at	SPARC	1 x 50	5 q33	secreted protein acidic and cysteine rich [Source:HGNC Symbol;Acc:HGNC:11219]
208636_at	ACTN1	1 x 49	14 q24	actinin alpha 1 [Source:HGNC Symbol;Acc:HGNC:163]
212169_at	FKBP9P1	6 x 50	7 p11	FK506 binding protein 9 pseudogene 1 [Source:HGNC Symbol;Acc:HGNC:23568]
218729_at	LXN	4 x 49	3 q25	latexin [Source:HGNC Symbol;Acc:HGNC:13347]
212067_s_at	C1R	1 x 49	12 p13	complement C1r [Source:HGNC Symbol;Acc:HGNC:1246]
215111_s_at	TSC22D1	6 x 49	13 q14	TSC22 domain family member 1 [Source:HGNC Symbol;Acc:HGNC:16826]
202252_at	RAB13	2 x 48	1 q21	RAB13, member RAS oncogene family [Source:HGNC Symbol;Acc:HGNC:9762]
209081_s_at	COL18A1	4 x 50	21 q22	collagen type XVIII alpha 1 chain [Source:HGNC Symbol;Acc:HGNC:2195]
38671_at	PLXND1	2 x 48	3 q22	plexin D1 [Source:HGNC Symbol;Acc:HGNC:9107]
204135_at	FILIP1L	2 x 49	3 q12	filamin A interacting protein 1 like [Source:HGNC Symbol;Acc:HGNC:24589]
221529_s_at	PLVAP	6 x 50	19 p13	plasmalemma vesicle associated protein [Source:HGNC Symbol;Acc:HGNC:13635]
217975_at	TCEAL9	5 x 50	X q22	transcription elongation factor A like 9 [Source:HGNC Symbol;Acc:HGNC:30084]
205303_at	KCNJ8	6 x 50	12 p12	potassium voltage-gated channel subfamily J member 8 [Source:HGNC Symbol;Acc:HGNC:6269]
208789_at	PTRF	3 x 50	17 q21	polymerase I and transcript release factor [Source:HGNC Symbol;Acc:HGNC:9688]
211981_at	COL4A1	1 x 50	13 q34	collagen type IV alpha 1 chain [Source:HGNC Symbol;Acc:HGNC:2202]
211340_s_at	MCAM	5 x 50	11 q23	melanoma cell adhesion molecule [Source:HGNC Symbol;Acc:HGNC:6934]
201163_s_at	IGFBP7	1 x 49	4 q12	insulin like growth factor binding protein 7 [Source:HGNC Symbol;Acc:HGNC:5476]
208747_s_at	C1S	1 x 49	12 p13	complement C1s [Source:HGNC Symbol;Acc:HGNC:1247]
202283_at	SERPINF1	1 x 50	17 p13	serpin family F member 1 [Source:HGNC Symbol;Acc:HGNC:8824]
201162_at	IGFBP7	1 x 50	4 q12	insulin like growth factor binding protein 7 [Source:HGNC Symbol;Acc:HGNC:5476]
200771_at	LAMC1	5 x 50	1 q25	laminin subunit gamma 1 [Source:HGNC Symbol;Acc:HGNC:6492]
200696_s_at	GSN	2 x 48	9 q33	gelsolin [Source:HGNC Symbol;Acc:HGNC:4620]

## Sheet: Module H
ID	Symbol	Metagene	Chromosome	Description
206834_at	HBD	24 x 29	11 p15	hemoglobin subunit delta [Source:HGNC Symbol;Acc:HGNC:4829]
211674_x_at	CTAG1A	24 x 28	X q28	cancer/testis antigen 1A [Source:HGNC Symbol;Acc:HGNC:24198]
210546_x_at	CTAG1A	24 x 28	X q28	cancer/testis antigen 1A [Source:HGNC Symbol;Acc:HGNC:24198]
215733_x_at	CTAG1A	24 x 28	X q28	cancer/testis antigen 1A [Source:HGNC Symbol;Acc:HGNC:24198]
206121_at	AMPD1	24 x 29	1 p13	adenosine monophosphate deaminase 1 [Source:HGNC Symbol;Acc:HGNC:468]
219270_at	CHAC1	23 x 28	15 q15	ChaC glutathione specific gamma-glutamylcyclotransferase 1 [Source:HGNC Symbol;Acc:HGNC:28680]
210997_at	HGF	24 x 29	7 q21	hepatocyte growth factor [Source:HGNC Symbol;Acc:HGNC:4893]
222245_s_at		24 x 28	20 q11	fer-1 like family member 4, pseudogene [Source:HGNC Symbol;Acc:HGNC:15801]
206574_s_at	PTP4A3	23 x 28	8 q24	protein tyrosine phosphatase type IVA, member 3 [Source:HGNC Symbol;Acc:HGNC:9636]
214117_s_at	BTD	23 x 29	3 p25	biotinidase [Source:HGNC Symbol;Acc:HGNC:1122]
205309_at	SMPDL3B	23 x 28	1 p35	sphingomyelin phosphodiesterase acid like 3B [Source:HGNC Symbol;Acc:HGNC:21416]
219888_at	SPAG4	24 x 28	20 q11	sperm associated antigen 4 [Source:HGNC Symbol;Acc:HGNC:11214]
210942_s_at	ST3GAL6	24 x 29	3 q12	ST3 beta-galactoside alpha-2,3-sialyltransferase 6 [Source:HGNC Symbol;Acc:HGNC:18080]
213355_at	ST3GAL6	24 x 29	3 q12	ST3 beta-galactoside alpha-2,3-sialyltransferase 6 [Source:HGNC Symbol;Acc:HGNC:18080]
214657_s_at	NEAT1	24 x 27	11 q13	nuclear paraspeckle assembly transcript 1 (non-protein coding) [Source:HGNC Symbol;Acc:HGNC:30815]
212699_at	SCAMP5	23 x 29	15 q24	secretory carrier membrane protein 5 [Source:HGNC Symbol;Acc:HGNC:30386]
210534_s_at	B9D1	24 x 27	17 p11	B9 domain containing 1 [Source:HGNC Symbol;Acc:HGNC:24123]
214116_at	BTD	24 x 29	3 p25	biotinidase [Source:HGNC Symbol;Acc:HGNC:1122]
208499_s_at	DNAJC3	24 x 28	13 q32	DnaJ heat shock protein family (Hsp40) member C3 [Source:HGNC Symbol;Acc:HGNC:9439]
218436_at	SIL1	23 x 29	5 q31	SIL1 nucleotide exchange factor [Source:HGNC Symbol;Acc:HGNC:24624]
221029_s_at	WNT5B	23 x 28	12 p13	Wnt family member 5B [Source:HGNC Symbol;Acc:HGNC:16265]
217192_s_at	PRDM1	24 x 28	6 q21	PR/SET domain 1 [Source:HGNC Symbol;Acc:HGNC:9346]
201203_s_at	RRBP1	23 x 29	20 p12	ribosome binding protein 1 [Source:HGNC Symbol;Acc:HGNC:10448]
209032_s_at	CADM1	24 x 28	11 q23	cell adhesion molecule 1 [Source:HGNC Symbol;Acc:HGNC:5951]
202062_s_at	SEL1L	24 x 28	14 q31	SEL1L ERAD E3 ligase adaptor subunit [Source:HGNC Symbol;Acc:HGNC:10717]
202843_at	DNAJB9	24 x 29	7 q31	DnaJ heat shock protein family (Hsp40) member B9 [Source:HGNC Symbol;Acc:HGNC:6968]
210006_at	ABHD14A	24 x 29	3 p21	abhydrolase domain containing 14A [Source:HGNC Symbol;Acc:HGNC:24538]
205467_at	CASP10	24 x 28	2 q33	caspase 10 [Source:HGNC Symbol;Acc:HGNC:1500]
204918_s_at	MLLT3	23 x 29	9 p21	MLLT3, super elongation complex subunit [Source:HGNC Symbol;Acc:HGNC:7136]
213555_at	RWDD2A	24 x 28	6 q14	RWD domain containing 2A [Source:HGNC Symbol;Acc:HGNC:21385]
221156_x_at	CCPG1	23 x 29	15 q21	cell cycle progression 1 [Source:HGNC Symbol;Acc:HGNC:24227]
200770_s_at	LAMC1	24 x 27	1 q25	laminin subunit gamma 1 [Source:HGNC Symbol;Acc:HGNC:6492]
202558_s_at	HSPA13	24 x 28	21 q11	heat shock protein family A (Hsp70) member 13 [Source:HGNC Symbol;Acc:HGNC:11375]
216449_x_at	HSP90B1	24 x 27	12 q23	heat shock protein 90 beta family member 1 [Source:HGNC Symbol;Acc:HGNC:12028]
217790_s_at	SSR3	24 x 28	3 q25	signal sequence receptor subunit 3 [Source:HGNC Symbol;Acc:HGNC:11325]
202027_at	TMEM184B	24 x 27	22 q13	transmembrane protein 184B [Source:HGNC Symbol;Acc:HGNC:1310]
209340_at	UAP1	23 x 27	1 q23	UDP-N-acetylglucosamine pyrophosphorylase 1 [Source:HGNC Symbol;Acc:HGNC:12457]
202241_at	TRIB1	24 x 28	8 q24	tribbles pseudokinase 1 [Source:HGNC Symbol;Acc:HGNC:16891]
201204_s_at	RRBP1	23 x 29	20 p12	ribosome binding protein 1 [Source:HGNC Symbol;Acc:HGNC:10448]
219118_at	FKBP11	24 x 28	12 q13	FK506 binding protein 11 [Source:HGNC Symbol;Acc:HGNC:18624]
218409_s_at	DNAJC1	24 x 29	10 p12	DnaJ heat shock protein family (Hsp40) member C1 [Source:HGNC Symbol;Acc:HGNC:20090]
204384_at	GOLGA2	23 x 29	9 q34	golgin A2 [Source:HGNC Symbol;Acc:HGNC:4425]
200999_s_at	CKAP4	24 x 27	12 q23	cytoskeleton associated protein 4 [Source:HGNC Symbol;Acc:HGNC:16991]
213540_at	HSD17B8	23 x 28	6 p21	hydroxysteroid 17-beta dehydrogenase 8 [Source:HGNC Symbol;Acc:HGNC:3554]
202083_s_at	SEC14L1	24 x 27	17 q25	SEC14 like lipid binding 1 [Source:HGNC Symbol;Acc:HGNC:10698]
202721_s_at	GFPT1	24 x 27	2 p13	glutamine--fructose-6-phosphate transaminase 1 [Source:HGNC Symbol;Acc:HGNC:4241]
40472_at	LPCAT4	23 x 27	15 q14	lysophosphatidylcholine acyltransferase 4 [Source:HGNC Symbol;Acc:HGNC:30059]
203391_at	FKBP2	24 x 29	11 q13	FK506 binding protein 2 [Source:HGNC Symbol;Acc:HGNC:3718]
218257_s_at	UGGT1	24 x 28	2 q14	UDP-glucose glycoprotein glucosyltransferase 1 [Source:HGNC Symbol;Acc:HGNC:15663]
219117_s_at		24 x 28	12 q13
219374_s_at		23 x 27	11 q23
210768_x_at		23 x 28
201582_at	SEC23B	23 x 28	20 p11	Sec23 homolog B, coat complex II component [Source:HGNC Symbol;Acc:HGNC:10702]
210041_s_at	PGM3	23 x 29	6 q14	phosphoglucomutase 3 [Source:HGNC Symbol;Acc:HGNC:8907]
53071_s_at	OGFOD3	23 x 27	17 q25	2-oxoglutarate and iron dependent oxygenase domain containing 3 [Source:HGNC Symbol;Acc:HGNC:26174]
200998_s_at	CKAP4	24 x 27	12 q23	cytoskeleton associated protein 4 [Source:HGNC Symbol;Acc:HGNC:16991]
202667_s_at	SLC39A7	23 x 28	6 p21	solute carrier family 39 member 7 [Source:HGNC Symbol;Acc:HGNC:4927]
212902_at	SEC24A	24 x 27	5 q31	SEC24 homolog A, COPII coat complex component [Source:HGNC Symbol;Acc:HGNC:10703]
207855_s_at	CLCC1	23 x 27	1 p13	chloride channel CLIC like 1 [Source:HGNC Symbol;Acc:HGNC:29675]
218681_s_at	SDF2L1	23 x 28	22 q11	stromal cell derived factor 2 like 1 [Source:HGNC Symbol;Acc:HGNC:10676]
217787_s_at	GALNT2	24 x 27	1 q42	polypeptide N-acetylgalactosaminyltransferase 2 [Source:HGNC Symbol;Acc:HGNC:4124]
204785_x_at	IFNAR2	24 x 29	21 q22	interferon alpha and beta receptor subunit 2 [Source:HGNC Symbol;Acc:HGNC:5433]
201704_at	ENTPD6	24 x 28	20 p11	ectonucleoside triphosphate diphosphohydrolase 6 (putative) [Source:HGNC Symbol;Acc:HGNC:3368]
200670_at		24 x 28
220495_s_at	TXNDC15	23 x 29	5 q31	thioredoxin domain containing 15 [Source:HGNC Symbol;Acc:HGNC:20652]
202722_s_at	GFPT1	23 x 28	2 p13	glutamine--fructose-6-phosphate transaminase 1 [Source:HGNC Symbol;Acc:HGNC:4241]
218282_at	EDEM2	23 x 28	20 q11	ER degradation enhancing alpha-mannosidase like protein 2 [Source:HGNC Symbol;Acc:HGNC:15877]
205105_at	MAN2A1	24 x 29	5 q21	mannosidase alpha class 2A member 1 [Source:HGNC Symbol;Acc:HGNC:6824]
200598_s_at	HSP90B1	24 x 27	12 q23	heat shock protein 90 beta family member 1 [Source:HGNC Symbol;Acc:HGNC:12028]
201057_s_at	GOLGB1	24 x 29	3 q13	golgin B1 [Source:HGNC Symbol;Acc:HGNC:4429]
221253_s_at		24 x 29	6 p24	BLOC1S5-TXNDC5 readthrough (NMD candidate) [Source:HGNC Symbol;Acc:HGNC:42001]
221739_at	MYDGF	23 x 29	19 p13	myeloid derived growth factor [Source:HGNC Symbol;Acc:HGNC:16948]
218333_at	DERL2	24 x 29	17 p13	derlin 2 [Source:HGNC Symbol;Acc:HGNC:17943]
202655_at	MANF	23 x 28	3 p21	mesencephalic astrocyte derived neurotrophic factor [Source:HGNC Symbol;Acc:HGNC:15461]
219920_s_at	IP6K1	23 x 27	3 p21	inositol hexakisphosphate kinase 1 [Source:HGNC Symbol;Acc:HGNC:18360]
218516_s_at	IMPAD1	22 x 28	8 q12	inositol monophosphatase domain containing 1 [Source:HGNC Symbol;Acc:HGNC:26019]
218853_s_at	MOSPD1	24 x 27	X q26	motile sperm domain containing 1 [Source:HGNC Symbol;Acc:HGNC:25235]
202375_at	SEC24D	23 x 28	4 q26	SEC24 homolog D, COPII coat complex component [Source:HGNC Symbol;Acc:HGNC:10706]
202223_at	STT3A	23 x 27	11 q24	STT3A, catalytic subunit of the oligosaccharyltransferase complex [Source:HGNC Symbol;Acc:HGNC:6172]
212900_at	SEC24A	24 x 29	5 q31	SEC24 homolog A, COPII coat complex component [Source:HGNC Symbol;Acc:HGNC:10703]
221597_s_at	TMEM208	23 x 29	16 q22	transmembrane protein 208 [Source:HGNC Symbol;Acc:HGNC:25015]
201923_at	PRDX4	23 x 29	X p22	peroxiredoxin 4 [Source:HGNC Symbol;Acc:HGNC:17169]
210243_s_at	B4GALT3	24 x 27	1 q23	beta-1,4-galactosyltransferase 3 [Source:HGNC Symbol;Acc:HGNC:926]
218070_s_at	GMPPA	23 x 27	2 q35	GDP-mannose pyrophosphorylase A [Source:HGNC Symbol;Acc:HGNC:22923]
203164_at	SLC33A1	24 x 28	3 q25	solute carrier family 33 member 1 [Source:HGNC Symbol;Acc:HGNC:95]
208689_s_at	RPN2	23 x 29	20 q11	ribophorin II [Source:HGNC Symbol;Acc:HGNC:10382]
212685_s_at	TBL2	23 x 28	7 q11	transducin beta like 2 [Source:HGNC Symbol;Acc:HGNC:11586]
202418_at	YIF1A	22 x 28	11 q13	Yip1 interacting factor homolog A, membrane trafficking protein [Source:HGNC Symbol;Acc:HGNC:16688]
216483_s_at	MYDGF	23 x 29	19 p13	myeloid derived growth factor [Source:HGNC Symbol;Acc:HGNC:16948]
209150_s_at		22 x 28	14 q12
200616_s_at	MLEC	23 x 28	12 q24	malectin [Source:HGNC Symbol;Acc:HGNC:28973]
200825_s_at	HYOU1	23 x 28	11 q23	hypoxia up-regulated 1 [Source:HGNC Symbol;Acc:HGNC:16931]
221553_at	MAGT1	23 x 28	X q21	magnesium transporter 1 [Source:HGNC Symbol;Acc:HGNC:28880]
200599_s_at	HSP90B1	24 x 27	12 q23	heat shock protein 90 beta family member 1 [Source:HGNC Symbol;Acc:HGNC:12028]
200968_s_at	PPIB	23 x 28	15 q22	peptidylprolyl isomerase B [Source:HGNC Symbol;Acc:HGNC:9255]
211048_s_at	PDIA4	23 x 28	7 q36	protein disulfide isomerase family A member 4 [Source:HGNC Symbol;Acc:HGNC:30167]
202433_at	SLC35B1	22 x 28	17 q21	solute carrier family 35 member B1 [Source:HGNC Symbol;Acc:HGNC:20798]
208639_x_at	PDIA6	23 x 28	2 p25	protein disulfide isomerase family A member 6 [Source:HGNC Symbol;Acc:HGNC:30168]
221853_s_at	NOMO3	22 x 28	16 p13	NODAL modulator 3 [Source:HGNC Symbol;Acc:HGNC:25242]
217716_s_at	SEC61A1	23 x 27	3 q21	Sec61 translocon alpha 1 subunit [Source:HGNC Symbol;Acc:HGNC:18276]
211936_at	HSPA5	24 x 29	9 q33	heat shock protein family A (Hsp70) member 5 [Source:HGNC Symbol;Acc:HGNC:5238]
217858_s_at	ARMCX3	24 x 27	X q22	armadillo repeat containing, X-linked 3 [Source:HGNC Symbol;Acc:HGNC:24065]
201011_at	RPN1	23 x 27	3 q21	ribophorin I [Source:HGNC Symbol;Acc:HGNC:10381]
200967_at	PPIB	22 x 28	15 q22	peptidylprolyl isomerase B [Source:HGNC Symbol;Acc:HGNC:9255]
207668_x_at	PDIA6	22 x 28	2 p25	protein disulfide isomerase family A member 6 [Source:HGNC Symbol;Acc:HGNC:30168]

## Sheet: Module I
ID	Symbol	Metagene	Chromosome	Description
201496_x_at	MYH11	8 x 50	16 p13	myosin heavy chain 11 [Source:HGNC Symbol;Acc:HGNC:7569]
214433_s_at	SELENBP1	8 x 50	1 q21	selenium binding protein 1 [Source:HGNC Symbol;Acc:HGNC:10719]
220037_s_at	LYVE1	8 x 50	11 p15	lymphatic vessel endothelial hyaluronan receptor 1 [Source:HGNC Symbol;Acc:HGNC:14687]
209278_s_at	TFPI2	8 x 48	7 q21	tissue factor pathway inhibitor 2 [Source:HGNC Symbol;Acc:HGNC:11761]
209160_at	AKR1C3	7 x 50	10 p15	aldo-keto reductase family 1 member C3 [Source:HGNC Symbol;Acc:HGNC:386]
203698_s_at	FRZB	10 x 50	2 q32	frizzled-related protein [Source:HGNC Symbol;Acc:HGNC:3959]
211861_x_at	CD28	12 x 48	2 q33	CD28 molecule [Source:HGNC Symbol;Acc:HGNC:1653]
203697_at	FRZB	10 x 50	2 q32	frizzled-related protein [Source:HGNC Symbol;Acc:HGNC:3959]
209283_at	CRYAB	7 x 50	11 q23	crystallin alpha B [Source:HGNC Symbol;Acc:HGNC:2389]
215536_at	HLA-DQB2	11 x 49	6 p21	major histocompatibility complex, class II, DQ beta 2 [Source:HGNC Symbol;Acc:HGNC:4945]
204777_s_at	MAL	12 x 50	2 q11	mal, T-cell differentiation protein [Source:HGNC Symbol;Acc:HGNC:6817]
214974_x_at	CXCL5	8 x 50	4 q13	C-X-C motif chemokine ligand 5 [Source:HGNC Symbol;Acc:HGNC:10642]
203980_at	FABP4	7 x 50	8 q21	fatty acid binding protein 4 [Source:HGNC Symbol;Acc:HGNC:3559]
212805_at	PRUNE2	9 x 50	9 q21	prune homolog 2 [Source:HGNC Symbol;Acc:HGNC:25209]
202018_s_at	LTF	11 x 50	3 p21	lactotransferrin [Source:HGNC Symbol;Acc:HGNC:6720]
201497_x_at	MYH11	8 x 50	16 p13	myosin heavy chain 11 [Source:HGNC Symbol;Acc:HGNC:7569]
206759_at	FCER2	13 x 49	19 p13	Fc fragment of IgE receptor II [Source:HGNC Symbol;Acc:HGNC:3612]
206701_x_at	EDNRB	9 x 50	13 q22	endothelin receptor type B [Source:HGNC Symbol;Acc:HGNC:3180]
205440_s_at	NPY1R	11 x 50	4 q32	neuropeptide Y receptor Y1 [Source:HGNC Symbol;Acc:HGNC:7956]
216594_x_at	AKR1C1	7 x 50	10 p15	aldo-keto reductase family 1 member C1 [Source:HGNC Symbol;Acc:HGNC:384]
204273_at	EDNRB	9 x 50	13 q22	endothelin receptor type B [Source:HGNC Symbol;Acc:HGNC:3180]
217469_at		12 x 50	14 q32	immunoglobulin heavy constant epsilon [Source:HGNC Symbol;Acc:HGNC:5522]
219093_at	PID1	9 x 50	2 q36	phosphotyrosine interaction domain containing 1 [Source:HGNC Symbol;Acc:HGNC:26084]
219059_s_at	LYVE1	7 x 49	11 p15	lymphatic vessel endothelial hyaluronan receptor 1 [Source:HGNC Symbol;Acc:HGNC:14687]
201131_s_at	CDH1	11 x 50	16 q22	cadherin 1 [Source:HGNC Symbol;Acc:HGNC:1748]
204134_at	PDE2A	8 x 50	11 q13	phosphodiesterase 2A [Source:HGNC Symbol;Acc:HGNC:8777]
203372_s_at	SOCS2	8 x 49	12 q22	suppressor of cytokine signaling 2 [Source:HGNC Symbol;Acc:HGNC:19382]
221796_at	NTRK2	8 x 50	9 q21	neurotrophic receptor tyrosine kinase 2 [Source:HGNC Symbol;Acc:HGNC:8032]
205376_at	INPP4B	11 x 48	4 q31	inositol polyphosphate-4-phosphatase type II B [Source:HGNC Symbol;Acc:HGNC:6075]
202376_at	SERPINA3	7 x 50	14 q32	serpin family A member 3 [Source:HGNC Symbol;Acc:HGNC:16]
210439_at	ICOS	11 x 49	2 q33	inducible T-cell costimulator [Source:HGNC Symbol;Acc:HGNC:5351]
204606_at	CCL21	11 x 50	9 p13	C-C motif chemokine ligand 21 [Source:HGNC Symbol;Acc:HGNC:10620]
207961_x_at	MYH11	8 x 50	16 p13	myosin heavy chain 11 [Source:HGNC Symbol;Acc:HGNC:7569]
205898_at	CX3CR1	11 x 48	3 p22	C-X3-C motif chemokine receptor 1 [Source:HGNC Symbol;Acc:HGNC:2558]
203548_s_at	LPL	8 x 50	8 p21	lipoprotein lipase [Source:HGNC Symbol;Acc:HGNC:6677]
202946_s_at	BTBD3	8 x 49	20 p12	BTB domain containing 3 [Source:HGNC Symbol;Acc:HGNC:15854]
210481_s_at	CLEC4M	12 x 50	19 p13	C-type lectin domain family 4 member M [Source:HGNC Symbol;Acc:HGNC:13523]
214470_at	KLRB1	11 x 50	12 p13	killer cell lectin like receptor B1 [Source:HGNC Symbol;Acc:HGNC:6373]
206070_s_at	EPHA3	9 x 50	3 p11	EPH receptor A3 [Source:HGNC Symbol;Acc:HGNC:3387]
210547_x_at	ICA1	11 x 50	7 p21	islet cell autoantigen 1 [Source:HGNC Symbol;Acc:HGNC:5343]
206291_at	NTS	11 x 50	12 q21	neurotensin [Source:HGNC Symbol;Acc:HGNC:8038]
211699_x_at	HBA2	7 x 50	16 p13	hemoglobin subunit alpha 2 [Source:HGNC Symbol;Acc:HGNC:4824]
209612_s_at	ADH1B	10 x 50	4 q23	alcohol dehydrogenase 1B (class I), beta polypeptide [Source:HGNC Symbol;Acc:HGNC:250]
217414_x_at	HBA2	7 x 50	16 p13	hemoglobin subunit alpha 2 [Source:HGNC Symbol;Acc:HGNC:4824]
205347_s_at	TMSB15A	10 x 50	X q22	thymosin beta 15a [Source:HGNC Symbol;Acc:HGNC:30744]
206760_s_at	FCER2	13 x 49	19 p13	Fc fragment of IgE receptor II [Source:HGNC Symbol;Acc:HGNC:3612]
207134_x_at	TPSB2	9 x 50	16 p13	tryptase beta 2 (gene/pseudogene) [Source:HGNC Symbol;Acc:HGNC:14120]
203373_at	SOCS2	9 x 50	12 q22	suppressor of cytokine signaling 2 [Source:HGNC Symbol;Acc:HGNC:19382]
201957_at	PPP1R12B	10 x 50	1 q32	protein phosphatase 1 regulatory subunit 12B [Source:HGNC Symbol;Acc:HGNC:7619]
218546_at	C1orf115	10 x 50	1 q41	chromosome 1 open reading frame 115 [Source:HGNC Symbol;Acc:HGNC:25873]
207741_x_at	TPSAB1	8 x 50	16 p13	tryptase alpha/beta 1 [Source:HGNC Symbol;Acc:HGNC:12019]
206545_at	CD28	11 x 49	2 q33	CD28 molecule [Source:HGNC Symbol;Acc:HGNC:1653]
209613_s_at	ADH1B	10 x 50	4 q23	alcohol dehydrogenase 1B (class I), beta polypeptide [Source:HGNC Symbol;Acc:HGNC:250]
201539_s_at	FHL1	9 x 50	X q26	four and a half LIM domains 1 [Source:HGNC Symbol;Acc:HGNC:3702]
210298_x_at	FHL1	9 x 50	X q26	four and a half LIM domains 1 [Source:HGNC Symbol;Acc:HGNC:3702]
211745_x_at	HBA2	7 x 50	16 p13	hemoglobin subunit alpha 2 [Source:HGNC Symbol;Acc:HGNC:4824]
216474_x_at	TPSB2	8 x 50	16 p13	tryptase beta 2 (gene/pseudogene) [Source:HGNC Symbol;Acc:HGNC:14120]
209116_x_at	HBB	7 x 50	11 p15	hemoglobin subunit beta [Source:HGNC Symbol;Acc:HGNC:4827]
212865_s_at	COL14A1	8 x 50	8 q24	collagen type XIV alpha 1 chain [Source:HGNC Symbol;Acc:HGNC:2191]
219295_s_at	PCOLCE2	9 x 50	3 q23	procollagen C-endopeptidase enhancer 2 [Source:HGNC Symbol;Acc:HGNC:8739]
209458_x_at	HBA2	7 x 50	16 p13	hemoglobin subunit alpha 2 [Source:HGNC Symbol;Acc:HGNC:4824]
205554_s_at	DNASE1L3	11 x 50	3 p14	deoxyribonuclease 1 like 3 [Source:HGNC Symbol;Acc:HGNC:2959]
212148_at	PBX1	8 x 50	1 q23	PBX homeobox 1 [Source:HGNC Symbol;Acc:HGNC:8632]
217232_x_at	HBB	7 x 50	11 p15	hemoglobin subunit beta [Source:HGNC Symbol;Acc:HGNC:4827]
203571_s_at	ADIRF	8 x 50	10 q23	adipogenesis regulatory factor [Source:HGNC Symbol;Acc:HGNC:24043]
211856_x_at	CD28	12 x 48	2 q33	CD28 molecule [Source:HGNC Symbol;Acc:HGNC:1653]
218002_s_at	CXCL14	10 x 50	5 q31	C-X-C motif chemokine ligand 14 [Source:HGNC Symbol;Acc:HGNC:10640]
207277_at	CD209	8 x 50	19 p13	CD209 molecule [Source:HGNC Symbol;Acc:HGNC:1641]
211209_x_at	SH2D1A	11 x 49	X q25	SH2 domain containing 1A [Source:HGNC Symbol;Acc:HGNC:10820]
212713_at	MFAP4	9 x 50	17 p11	microfibrillar associated protein 4 [Source:HGNC Symbol;Acc:HGNC:7035]
215382_x_at	TPSB2	8 x 50	16 p13	tryptase beta 2 (gene/pseudogene) [Source:HGNC Symbol;Acc:HGNC:14120]
211696_x_at	HBB	7 x 50	11 p15	hemoglobin subunit beta [Source:HGNC Symbol;Acc:HGNC:4827]
204018_x_at	HBA2	7 x 50	16 p13	hemoglobin subunit alpha 2 [Source:HGNC Symbol;Acc:HGNC:4824]
218468_s_at	GREM1	7 x 50	15 q13	gremlin 1, DAN family BMP antagonist [Source:HGNC Symbol;Acc:HGNC:2001]
205683_x_at	TPSB2	8 x 50	16 p13	tryptase beta 2 (gene/pseudogene) [Source:HGNC Symbol;Acc:HGNC:14120]
214761_at	ZNF423	8 x 50	16 q12	zinc finger protein 423 [Source:HGNC Symbol;Acc:HGNC:16762]
206363_at	MAF	11 x 50	16 q23	MAF bZIP transcription factor [Source:HGNC Symbol;Acc:HGNC:6776]
217023_x_at	TPSB2	8 x 50	16 p13	tryptase beta 2 (gene/pseudogene) [Source:HGNC Symbol;Acc:HGNC:14120]
214505_s_at	FHL1	9 x 50	X q26	four and a half LIM domains 1 [Source:HGNC Symbol;Acc:HGNC:3702]
205158_at	ANG	8 x 50	14 q11	angiogenin [Source:HGNC Symbol;Acc:HGNC:483]
200636_s_at	PTPRF	8 x 50	1 p34	protein tyrosine phosphatase, receptor type F [Source:HGNC Symbol;Acc:HGNC:9670]
214567_s_at	XCL2	11 x 49	1 q24	X-C motif chemokine ligand 2 [Source:HGNC Symbol;Acc:HGNC:10646]
209894_at	LEPR	9 x 50	1 p31	leptin receptor [Source:HGNC Symbol;Acc:HGNC:6554]
206481_s_at	LDB2	7 x 50	4 p15	LIM domain binding 2 [Source:HGNC Symbol;Acc:HGNC:6533]
209109_s_at	TSPAN6	7 x 50	X q22	tetraspanin 6 [Source:HGNC Symbol;Acc:HGNC:11858]
202350_s_at	MATN2	10 x 50	8 q22	matrilin 2 [Source:HGNC Symbol;Acc:HGNC:6908]
202932_at	YES1	7 x 49	18 p11	YES proto-oncogene 1, Src family tyrosine kinase [Source:HGNC Symbol;Acc:HGNC:12841]
214414_x_at	HBA2	7 x 50	16 p13	hemoglobin subunit alpha 2 [Source:HGNC Symbol;Acc:HGNC:4824]
209291_at	ID4	8 x 50	6 p22	inhibitor of DNA binding 4, HLH protein [Source:HGNC Symbol;Acc:HGNC:5363]
205200_at	CLEC3B	9 x 50	3 p21	C-type lectin domain family 3 member B [Source:HGNC Symbol;Acc:HGNC:11891]
206181_at	SLAMF1	12 x 48	1 q23	signaling lymphocytic activation molecule family member 1 [Source:HGNC Symbol;Acc:HGNC:10903]
206366_x_at	XCL2	11 x 49	1 q24	X-C motif chemokine ligand 2 [Source:HGNC Symbol;Acc:HGNC:10646]
205236_x_at	SOD3	8 x 48	4 p15	superoxide dismutase 3 [Source:HGNC Symbol;Acc:HGNC:11181]
210084_x_at	TPSB2	8 x 50	16 p13	tryptase beta 2 (gene/pseudogene) [Source:HGNC Symbol;Acc:HGNC:14120]
221958_s_at	WLS	7 x 49	1 p31	wntless Wnt ligand secretion mediator [Source:HGNC Symbol;Acc:HGNC:30238]
202973_x_at	FAM13A	8 x 49	4 q22	family with sequence similarity 13 member A [Source:HGNC Symbol;Acc:HGNC:19367]
207979_s_at	CD8B	11 x 48	2 p11	CD8b molecule [Source:HGNC Symbol;Acc:HGNC:1707]
211958_at	IGFBP5	7 x 50	2 q35	insulin like growth factor binding protein 5 [Source:HGNC Symbol;Acc:HGNC:5474]
219416_at	SCARA3	10 x 50	8 p21	scavenger receptor class A member 3 [Source:HGNC Symbol;Acc:HGNC:19000]
202177_at	GAS6	8 x 49	13 q34	growth arrest specific 6 [Source:HGNC Symbol;Acc:HGNC:4168]
205392_s_at		10 x 50	17 q12	CCL15-CCL14 readthrough (NMD candidate) [Source:HGNC Symbol;Acc:HGNC:44436]
212776_s_at	OBSL1	7 x 48	2 q35	obscurin like 1 [Source:HGNC Symbol;Acc:HGNC:29092]
213397_x_at	RNASE4	8 x 50	14 q11	ribonuclease A family member 4 [Source:HGNC Symbol;Acc:HGNC:10047]
203706_s_at	FZD7	7 x 50	2 q33	frizzled class receptor 7 [Source:HGNC Symbol;Acc:HGNC:4045]
215784_at	CD1E	11 x 50	1 q23	CD1e molecule [Source:HGNC Symbol;Acc:HGNC:1638]
209540_at	IGF1	7 x 50	12 q23	insulin like growth factor 1 [Source:HGNC Symbol;Acc:HGNC:5464]
211726_s_at	FMO2	10 x 50	1 q24	flavin containing monooxygenase 2 [Source:HGNC Symbol;Acc:HGNC:3770]
207460_at	GZMM	11 x 48	19 p13	granzyme M [Source:HGNC Symbol;Acc:HGNC:4712]
202565_s_at	SVIL	8 x 50	10 p11	supervillin [Source:HGNC Symbol;Acc:HGNC:11480]
214551_s_at	CD7	11 x 49	17 q25	CD7 molecule [Source:HGNC Symbol;Acc:HGNC:1695]
218901_at	PLSCR4	8 x 50	3 q24	phospholipid scramblase 4 [Source:HGNC Symbol;Acc:HGNC:16497]
203413_at	NELL2	11 x 48	12 q12	neural EGFL like 2 [Source:HGNC Symbol;Acc:HGNC:7751]
209409_at	GRB10	7 x 50	7 p12	growth factor receptor bound protein 10 [Source:HGNC Symbol;Acc:HGNC:4564]
203632_s_at	GPRC5B	9 x 50	16 p12	G protein-coupled receptor class C group 5 member B [Source:HGNC Symbol;Acc:HGNC:13308]
205326_at	RAMP3	10 x 50	7 p13	receptor activity modifying protein 3 [Source:HGNC Symbol;Acc:HGNC:9845]
210116_at	SH2D1A	11 x 49	X q25	SH2 domain containing 1A [Source:HGNC Symbol;Acc:HGNC:10820]
203038_at	PTPRK	12 x 50	6 q22	protein tyrosine phosphatase, receptor type K [Source:HGNC Symbol;Acc:HGNC:9674]
209602_s_at	GATA3	11 x 48	10 p14	GATA binding protein 3 [Source:HGNC Symbol;Acc:HGNC:4172]
213029_at	NFIB	9 x 50	9 p22	nuclear factor I B [Source:HGNC Symbol;Acc:HGNC:7785]
202023_at	EFNA1	7 x 50	1 q22	ephrin A1 [Source:HGNC Symbol;Acc:HGNC:3221]
204933_s_at	TNFRSF11B	9 x 48	8 q24	TNF receptor superfamily member 11b [Source:HGNC Symbol;Acc:HGNC:11909]
213075_at	OLFML2A	7 x 48	9 q33	olfactomedin like 2A [Source:HGNC Symbol;Acc:HGNC:27270]
209228_x_at	TUSC3	7 x 49	8 p22	tumor suppressor candidate 3 [Source:HGNC Symbol;Acc:HGNC:30242]
202242_at		10 x 50	X p21
221667_s_at	HSPB8	8 x 50	12 q24	heat shock protein family B (small) member 8 [Source:HGNC Symbol;Acc:HGNC:30171]
205110_s_at	FGF13	11 x 50	X q27	fibroblast growth factor 13 [Source:HGNC Symbol;Acc:HGNC:3670]
214228_x_at	TNFRSF4	10 x 48	1 p36	TNF receptor superfamily member 4 [Source:HGNC Symbol;Acc:HGNC:11918]
201328_at	ETS2	8 x 50	21 q22	ETS proto-oncogene 2, transcription factor [Source:HGNC Symbol;Acc:HGNC:3489]
203549_s_at	LPL	9 x 50	8 p21	lipoprotein lipase [Source:HGNC Symbol;Acc:HGNC:6677]
205051_s_at	KIT	8 x 50	4 q12	KIT proto-oncogene receptor tyrosine kinase [Source:HGNC Symbol;Acc:HGNC:6342]
222043_at	CLU	11 x 50	8 p21	clusterin [Source:HGNC Symbol;Acc:HGNC:2095]
210643_at	TNFSF11	11 x 50	13 q14	tumor necrosis factor superfamily member 11 [Source:HGNC Symbol;Acc:HGNC:11926]
206983_at	CCR6	13 x 50	6 q27	C-C motif chemokine receptor 6 [Source:HGNC Symbol;Acc:HGNC:1607]
202920_at	ANK2	10 x 50	4 q25	ankyrin 2 [Source:HGNC Symbol;Acc:HGNC:493]
205399_at	DCLK1	9 x 50	13 q13	doublecortin like kinase 1 [Source:HGNC Symbol;Acc:HGNC:2700]
205945_at	IL6R	11 x 48	1 q21	interleukin 6 receptor [Source:HGNC Symbol;Acc:HGNC:6019]
207738_s_at	NCKAP1	7 x 50	2 q32	NCK associated protein 1 [Source:HGNC Symbol;Acc:HGNC:7666]
204223_at	PRELP	7 x 50	1 q32	proline and arginine rich end leucine rich repeat protein [Source:HGNC Symbol;Acc:HGNC:9357]
217147_s_at	TRAT1	11 x 49	3 q13	T-cell receptor associated transmembrane adaptor 1 [Source:HGNC Symbol;Acc:HGNC:30698]
206702_at	TEK	7 x 50	9 p21	TEK receptor tyrosine kinase [Source:HGNC Symbol;Acc:HGNC:11724]
204011_at	SPRY2	8 x 48	13 q31	sprouty RTK signaling antagonist 2 [Source:HGNC Symbol;Acc:HGNC:11270]
213032_at	NFIB	8 x 50	9 p22	nuclear factor I B [Source:HGNC Symbol;Acc:HGNC:7785]
207030_s_at	CSRP2	9 x 50	12 q21	cysteine and glycine rich protein 2 [Source:HGNC Symbol;Acc:HGNC:2470]
44783_s_at	HEY1	8 x 49	8 q21	hes related family bHLH transcription factor with YRPW motif 1 [Source:HGNC Symbol;Acc:HGNC:4880]
202747_s_at	ITM2A	11 x 48	X q21	integral membrane protein 2A [Source:HGNC Symbol;Acc:HGNC:6173]
219440_at	RAI2	10 x 50	X p22	retinoic acid induced 2 [Source:HGNC Symbol;Acc:HGNC:9835]
210073_at	ST8SIA1	11 x 50	12 p12	ST8 alpha-N-acetyl-neuraminide alpha-2,8-sialyltransferase 1 [Source:HGNC Symbol;Acc:HGNC:10869]
204894_s_at	AOC3	7 x 50	17 q21	amine oxidase, copper containing 3 [Source:HGNC Symbol;Acc:HGNC:550]
215073_s_at	NR2F2	9 x 50	15 q26	nuclear receptor subfamily 2 group F member 2 [Source:HGNC Symbol;Acc:HGNC:7976]
208451_s_at	C4A	10 x 49	6 p21	complement C4A (Rodgers blood group) [Source:HGNC Symbol;Acc:HGNC:1323]
221790_s_at	LDLRAP1	12 x 49	1 p36	low density lipoprotein receptor adaptor protein 1 [Source:HGNC Symbol;Acc:HGNC:18640]
213592_at	APLNR	7 x 50	11 q12	apelin receptor [Source:HGNC Symbol;Acc:HGNC:339]
203666_at	CXCL12	9 x 50	10 q11	C-X-C motif chemokine ligand 12 [Source:HGNC Symbol;Acc:HGNC:10672]
221756_at	PIK3IP1	12 x 49	22 q12	phosphoinositide-3-kinase interacting protein 1 [Source:HGNC Symbol;Acc:HGNC:24942]
220975_s_at	C1QTNF1	8 x 50	17 q25	C1q and tumor necrosis factor related protein 1 [Source:HGNC Symbol;Acc:HGNC:14324]
211211_x_at	SH2D1A	11 x 49	X q25	SH2 domain containing 1A [Source:HGNC Symbol;Acc:HGNC:10820]
220027_s_at	RASIP1	8 x 50	19 q13	Ras interacting protein 1 [Source:HGNC Symbol;Acc:HGNC:24716]
205612_at	MMRN1	10 x 50	4 q22	multimerin 1 [Source:HGNC Symbol;Acc:HGNC:7178]
204041_at	MAOB	9 x 50	X p11	monoamine oxidase B [Source:HGNC Symbol;Acc:HGNC:6834]
202992_at	C7	11 x 50	5 p13	complement C7 [Source:HGNC Symbol;Acc:HGNC:1346]
206201_s_at	MEOX2	10 x 50	7 p21	mesenchyme homeobox 2 [Source:HGNC Symbol;Acc:HGNC:7014]
213135_at	TIAM1	11 x 50	21 q22	T-cell lymphoma invasion and metastasis 1 [Source:HGNC Symbol;Acc:HGNC:11805]
211210_x_at	SH2D1A	11 x 49	X q25	SH2 domain containing 1A [Source:HGNC Symbol;Acc:HGNC:10820]
212771_at	FAM171A1	8 x 50	10 p13	family with sequence similarity 171 member A1 [Source:HGNC Symbol;Acc:HGNC:23522]
218589_at	LPAR6	10 x 50	13 q14	lysophosphatidic acid receptor 6 [Source:HGNC Symbol;Acc:HGNC:15520]
212775_at	OBSL1	7 x 49	2 q35	obscurin like 1 [Source:HGNC Symbol;Acc:HGNC:29092]
208602_x_at	CD6	12 x 49	11 q12	CD6 molecule [Source:HGNC Symbol;Acc:HGNC:1691]
204359_at	FLRT2	9 x 50	14 q31	fibronectin leucine rich transmembrane protein 2 [Source:HGNC Symbol;Acc:HGNC:3761]
207892_at	CD40LG	12 x 50	X q26	CD40 ligand [Source:HGNC Symbol;Acc:HGNC:11935]
212096_s_at	MTUS1	8 x 50	8 p22	microtubule associated tumor suppressor 1 [Source:HGNC Symbol;Acc:HGNC:29789]
203002_at	AMOTL2	8 x 50	3 q22	angiomotin like 2 [Source:HGNC Symbol;Acc:HGNC:17812]
209763_at	CHRDL1	9 x 50	X q23	chordin like 1 [Source:HGNC Symbol;Acc:HGNC:29861]
206002_at	ADGRG2	11 x 50	X p22	adhesion G protein-coupled receptor G2 [Source:HGNC Symbol;Acc:HGNC:4516]
210299_s_at	FHL1	9 x 50	X q26	four and a half LIM domains 1 [Source:HGNC Symbol;Acc:HGNC:3702]
201983_s_at	EGFR	7 x 49	7 p11	epidermal growth factor receptor [Source:HGNC Symbol;Acc:HGNC:3236]
213258_at	TFPI	8 x 50	2 q32	tissue factor pathway inhibitor [Source:HGNC Symbol;Acc:HGNC:11760]
208335_s_at	ACKR1	10 x 50	1 q23	atypical chemokine receptor 1 (Duffy blood group) [Source:HGNC Symbol;Acc:HGNC:4035]
206953_s_at	ADGRL2	7 x 50	1 p31	adhesion G protein-coupled receptor L2 [Source:HGNC Symbol;Acc:HGNC:18582]
209071_s_at	RGS5	7 x 50	1 q23	regulator of G-protein signaling 5 [Source:HGNC Symbol;Acc:HGNC:10001]
206049_at	SELP	10 x 49	1 q24	selectin P [Source:HGNC Symbol;Acc:HGNC:10721]
212358_at	CLIP3	9 x 48	19 q13	CAP-Gly domain containing linker protein 3 [Source:HGNC Symbol;Acc:HGNC:24314]
206932_at	CH25H	9 x 49	10 q23	cholesterol 25-hydroxylase [Source:HGNC Symbol;Acc:HGNC:1907]
219064_at	ITIH5	10 x 50	10 p14	inter-alpha-trypsin inhibitor heavy chain family member 5 [Source:HGNC Symbol;Acc:HGNC:21449]
201117_s_at	CPE	8 x 50	4 q32	carboxypeptidase E [Source:HGNC Symbol;Acc:HGNC:2303]
214428_x_at	C4A	10 x 48	6 p21	complement C4A (Rodgers blood group) [Source:HGNC Symbol;Acc:HGNC:1323]
203088_at	FBLN5	8 x 50	14 q32	fibulin 5 [Source:HGNC Symbol;Acc:HGNC:3602]
203657_s_at	CTSF	8 x 49	11 q13	cathepsin F [Source:HGNC Symbol;Acc:HGNC:2531]
202669_s_at	EFNB2	8 x 50	13 q33	ephrin B2 [Source:HGNC Symbol;Acc:HGNC:3227]
213122_at	TSPYL5	13 x 49	8 q22	TSPY like 5 [Source:HGNC Symbol;Acc:HGNC:29367]
202566_s_at	SVIL	7 x 48	10 p11	supervillin [Source:HGNC Symbol;Acc:HGNC:11480]
214049_x_at	CD7	11 x 49	17 q25	CD7 molecule [Source:HGNC Symbol;Acc:HGNC:1695]
212423_at	ZCCHC24	7 x 50	10 q22	zinc finger CCHC-type containing 24 [Source:HGNC Symbol;Acc:HGNC:26911]
203888_at	THBD	9 x 50	20 p11	thrombomodulin [Source:HGNC Symbol;Acc:HGNC:11784]
218353_at	RGS5	8 x 50	1 q23	regulator of G-protein signaling 5 [Source:HGNC Symbol;Acc:HGNC:10001]
217412_at		12 x 48	14 q11	T-cell receptor alpha variable 9-2 [Source:HGNC Symbol;Acc:HGNC:12154]
203910_at	ARHGAP29	8 x 50	1 p22	Rho GTPase activating protein 29 [Source:HGNC Symbol;Acc:HGNC:30207]
203305_at	F13A1	7 x 50	6 p25	coagulation factor XIII A chain [Source:HGNC Symbol;Acc:HGNC:3531]
202554_s_at	GSTM3	7 x 50	1 p13	glutathione S-transferase mu 3 [Source:HGNC Symbol;Acc:HGNC:4635]
204368_at	SLCO2A1	8 x 50	3 q22	solute carrier organic anion transporter family member 2A1 [Source:HGNC Symbol;Acc:HGNC:10955]
203887_s_at	THBD	9 x 50	20 p11	thrombomodulin [Source:HGNC Symbol;Acc:HGNC:11784]
219778_at	ZFPM2	9 x 50	8 q22	zinc finger protein, FOG family member 2 [Source:HGNC Symbol;Acc:HGNC:16700]
205421_at	SLC22A3	11 x 50	6 q25	solute carrier family 22 member 3 [Source:HGNC Symbol;Acc:HGNC:10967]
213541_s_at	ERG	8 x 50	21 q22	ERG, ETS transcription factor [Source:HGNC Symbol;Acc:HGNC:3446]
201540_at	FHL1	9 x 50	X q26	four and a half LIM domains 1 [Source:HGNC Symbol;Acc:HGNC:3702]
204036_at	LPAR1	9 x 50	9 q31	lysophosphatidic acid receptor 1 [Source:HGNC Symbol;Acc:HGNC:3166]
206210_s_at	CETP	11 x 50	16 q13	cholesteryl ester transfer protein [Source:HGNC Symbol;Acc:HGNC:1869]
218665_at	FZD4	7 x 50	11 q14	frizzled class receptor 4 [Source:HGNC Symbol;Acc:HGNC:4042]
214720_x_at		8 x 48	8 q12	septin 10 pseudogene 1 [Source:HGNC Symbol;Acc:HGNC:40018]
207836_s_at	RBPMS	8 x 50	8 p12	RNA binding protein with multiple splicing [Source:HGNC Symbol;Acc:HGNC:19097]
211893_x_at	CD6	12 x 48	11 q12	CD6 molecule [Source:HGNC Symbol;Acc:HGNC:1691]
209290_s_at	NFIB	8 x 50	9 p22	nuclear factor I B [Source:HGNC Symbol;Acc:HGNC:7785]
205407_at	RECK	8 x 48	9 p13	reversion inducing cysteine rich protein with kazal motifs [Source:HGNC Symbol;Acc:HGNC:11345]
219568_x_at	SOX18	8 x 49	20 q13	SRY-box 18 [Source:HGNC Symbol;Acc:HGNC:11194]
219371_s_at	KLF2	12 x 49	19 p13	Kruppel like factor 2 [Source:HGNC Symbol;Acc:HGNC:6347]
212099_at	RHOB	7 x 50	2 p24	ras homolog family member B [Source:HGNC Symbol;Acc:HGNC:668]
37022_at	PRELP	7 x 49	1 q32	proline and arginine rich end leucine rich repeat protein [Source:HGNC Symbol;Acc:HGNC:9357]
212419_at	ZCCHC24	7 x 48	10 q22	zinc finger CCHC-type containing 24 [Source:HGNC Symbol;Acc:HGNC:26911]
209604_s_at	GATA3	11 x 49	10 p14	GATA binding protein 3 [Source:HGNC Symbol;Acc:HGNC:4172]
206761_at	CD96	12 x 48	3 q13	CD96 molecule [Source:HGNC Symbol;Acc:HGNC:16892]
220485_s_at	SIRPG	11 x 49	20 p13	signal regulatory protein gamma [Source:HGNC Symbol;Acc:HGNC:15757]
209869_at	ADRA2A	10 x 50	10 q25	adrenoceptor alpha 2A [Source:HGNC Symbol;Acc:HGNC:281]
218918_at	MAN1C1	10 x 49	1 p36	mannosidase alpha class 1C member 1 [Source:HGNC Symbol;Acc:HGNC:19080]
205405_at	SEMA5A	9 x 50	5 p15	semaphorin 5A [Source:HGNC Symbol;Acc:HGNC:10736]
202746_at	ITM2A	11 x 49	X q21	integral membrane protein 2A [Source:HGNC Symbol;Acc:HGNC:6173]
209505_at	NR2F1	11 x 50	5 q15	nuclear receptor subfamily 2 group F member 1 [Source:HGNC Symbol;Acc:HGNC:7975]
209821_at	IL33	10 x 50	9 p24	interleukin 33 [Source:HGNC Symbol;Acc:HGNC:16028]
40687_at	GJA4	8 x 49	1 p34	gap junction protein alpha 4 [Source:HGNC Symbol;Acc:HGNC:4278]
218062_x_at	CDC42EP4	10 x 50	17 q25	CDC42 effector protein 4 [Source:HGNC Symbol;Acc:HGNC:17147]
46665_at	SEMA4C	8 x 48	2 q11	semaphorin 4C [Source:HGNC Symbol;Acc:HGNC:10731]
213131_at	OLFM1	10 x 50	9 q34	olfactomedin 1 [Source:HGNC Symbol;Acc:HGNC:17187]
209047_at	AQP1	8 x 50	7 p14	aquaporin 1 (Colton blood group) [Source:HGNC Symbol;Acc:HGNC:633]
212486_s_at	FYN	11 x 48	6 q21	FYN proto-oncogene, Src family tyrosine kinase [Source:HGNC Symbol;Acc:HGNC:4037]
211000_s_at	IL6ST	10 x 48	5 q11	interleukin 6 signal transducer [Source:HGNC Symbol;Acc:HGNC:6021]
207996_s_at	LDLRAD4	11 x 49	18 p11	low density lipoprotein receptor class A domain containing 4 [Source:HGNC Symbol;Acc:HGNC:1224]
205254_x_at	TCF7	12 x 49	5 q31	transcription factor 7 (T-cell specific, HMG-box) [Source:HGNC Symbol;Acc:HGNC:11639]
210993_s_at	SMAD1	7 x 50	4 q31	SMAD family member 1 [Source:HGNC Symbol;Acc:HGNC:6767]
205168_at	DDR2	7 x 48	1 q23	discoidin domain receptor tyrosine kinase 2 [Source:HGNC Symbol;Acc:HGNC:2731]
208978_at	CRIP2	7 x 50	14 q32	cysteine rich protein 2 [Source:HGNC Symbol;Acc:HGNC:2361]
220418_at	UBASH3A	11 x 48	21 q22	ubiquitin associated and SH3 domain containing A [Source:HGNC Symbol;Acc:HGNC:12462]
219423_x_at	TNFRSF25	11 x 49	1 p36	TNF receptor superfamily member 25 [Source:HGNC Symbol;Acc:HGNC:11910]
214032_at	ZAP70	11 x 49	2 q11	zeta chain of T-cell receptor associated protein kinase 70 [Source:HGNC Symbol;Acc:HGNC:12858]
202598_at	S100A13	7 x 48	1 q21	S100 calcium binding protein A13 [Source:HGNC Symbol;Acc:HGNC:10490]
209348_s_at	MAF	10 x 50	16 q23	MAF bZIP transcription factor [Source:HGNC Symbol;Acc:HGNC:6776]
212624_s_at	CHN1	9 x 50	2 q31	chimerin 1 [Source:HGNC Symbol;Acc:HGNC:1943]
222062_at	IL27RA	12 x 48	19 p13	interleukin 27 receptor subunit alpha [Source:HGNC Symbol;Acc:HGNC:17290]
212190_at	SERPINE2	9 x 50	2 q36	serpin family E member 2 [Source:HGNC Symbol;Acc:HGNC:8951]
211282_x_at	TNFRSF25	11 x 48	1 p36	TNF receptor superfamily member 25 [Source:HGNC Symbol;Acc:HGNC:11910]
213247_at	SVEP1	10 x 50	9 q31	sushi, von Willebrand factor type A, EGF and pentraxin domain containing 1 [Source:HGNC Symbol;Acc:HGNC:15985]
203329_at	PTPRM	8 x 50	18 p11	protein tyrosine phosphatase, receptor type M [Source:HGNC Symbol;Acc:HGNC:9675]
210664_s_at	TFPI	8 x 50	2 q32	tissue factor pathway inhibitor [Source:HGNC Symbol;Acc:HGNC:11760]
206804_at	CD3G	11 x 49	11 q23	CD3g molecule [Source:HGNC Symbol;Acc:HGNC:1675]
209550_at	NDN	8 x 50	15 q11	necdin, MAGE family member [Source:HGNC Symbol;Acc:HGNC:7675]
209785_s_at	PLA2G4C	10 x 48	19 q13	phospholipase A2 group IVC [Source:HGNC Symbol;Acc:HGNC:9037]
218731_s_at	VWA1	8 x 50	1 p36	von Willebrand factor A domain containing 1 [Source:HGNC Symbol;Acc:HGNC:30910]
214721_x_at	CDC42EP4	10 x 50	17 q25	CDC42 effector protein 4 [Source:HGNC Symbol;Acc:HGNC:17147]
211900_x_at	CD6	12 x 48	11 q12	CD6 molecule [Source:HGNC Symbol;Acc:HGNC:1691]
202523_s_at	SPOCK2	12 x 48	10 q22	SPARC/osteonectin, cwcv and kazal like domains proteoglycan 2 [Source:HGNC Symbol;Acc:HGNC:13564]
205798_at	IL7R	10 x 50	5 p13	interleukin 7 receptor [Source:HGNC Symbol;Acc:HGNC:6024]
208937_s_at	ID1	8 x 50	20 q11	inhibitor of DNA binding 1, HLH protein [Source:HGNC Symbol;Acc:HGNC:5360]
208792_s_at	CLU	11 x 50	8 p21	clusterin [Source:HGNC Symbol;Acc:HGNC:2095]
219985_at	HS3ST3B1	10 x 49	17 p12	heparan sulfate-glucosamine 3-sulfotransferase 3A1 [Source:HGNC Symbol;Acc:HGNC:5196]
207542_s_at	AQP1	7 x 50	7 p14	aquaporin 1 (Colton blood group) [Source:HGNC Symbol;Acc:HGNC:633]
57082_at	LDLRAP1	12 x 49	1 p36	low density lipoprotein receptor adaptor protein 1 [Source:HGNC Symbol;Acc:HGNC:18640]
221814_at	ADGRA2	7 x 50	8 p11	adhesion G protein-coupled receptor A2 [Source:HGNC Symbol;Acc:HGNC:17849]
205779_at	RAMP2	8 x 50	17 q21	receptor activity modifying protein 2 [Source:HGNC Symbol;Acc:HGNC:9844]
209120_at	NR2F2	8 x 50	15 q26	nuclear receptor subfamily 2 group F member 2 [Source:HGNC Symbol;Acc:HGNC:7976]
205591_at	OLFM1	10 x 50	9 q34	olfactomedin 1 [Source:HGNC Symbol;Acc:HGNC:17187]
209879_at	SELPLG	10 x 48	12 q24	selectin P ligand [Source:HGNC Symbol;Acc:HGNC:10722]
212151_at	PBX1	7 x 50	1 q23	PBX homeobox 1 [Source:HGNC Symbol;Acc:HGNC:8632]
211005_at		11 x 49	16 p11
210674_s_at	PCDHA2	11 x 50	5 q31	protocadherin alpha 2 [Source:HGNC Symbol;Acc:HGNC:8668]
201116_s_at	CPE	7 x 50	4 q32	carboxypeptidase E [Source:HGNC Symbol;Acc:HGNC:2303]
214735_at	IPCEF1	12 x 48	6 q25	interaction protein for cytohesin exchange factors 1 [Source:HGNC Symbol;Acc:HGNC:21204]
210031_at	CD247	11 x 48	1 q24	CD247 molecule [Source:HGNC Symbol;Acc:HGNC:1677]
208450_at	LGALS2	11 x 49	22 q13	galectin 2 [Source:HGNC Symbol;Acc:HGNC:6562]
209541_at	IGF1	7 x 50	12 q23	insulin like growth factor 1 [Source:HGNC Symbol;Acc:HGNC:5464]
205544_s_at	CR2	12 x 50	1 q32	complement C3d receptor 2 [Source:HGNC Symbol;Acc:HGNC:2336]
205619_s_at	MEOX1	9 x 50	17 q21	mesenchyme homeobox 1 [Source:HGNC Symbol;Acc:HGNC:7013]
216620_s_at	ARHGEF10	8 x 49	8 p23	Rho guanine nucleotide exchange factor 10 [Source:HGNC Symbol;Acc:HGNC:14103]
219436_s_at	EMCN	7 x 50	4 q24	endomucin [Source:HGNC Symbol;Acc:HGNC:16041]
211339_s_at	ITK	11 x 49	5 q33	IL2 inducible T-cell kinase [Source:HGNC Symbol;Acc:HGNC:6171]
209289_at	NFIB	8 x 50	9 p22	nuclear factor I B [Source:HGNC Symbol;Acc:HGNC:7785]
203386_at	TBC1D4	11 x 50	13 q22	TBC1 domain family member 4 [Source:HGNC Symbol;Acc:HGNC:19165]
205456_at	CD3E	11 x 49	11 q23	CD3e molecule [Source:HGNC Symbol;Acc:HGNC:1674]
209121_x_at	NR2F2	8 x 50	15 q26	nuclear receptor subfamily 2 group F member 2 [Source:HGNC Symbol;Acc:HGNC:7976]
205771_s_at	AKAP7	12 x 48	6 q23	A-kinase anchoring protein 7 [Source:HGNC Symbol;Acc:HGNC:377]
209070_s_at	RGS5	7 x 50	1 q23	regulator of G-protein signaling 5 [Source:HGNC Symbol;Acc:HGNC:10001]
213924_at	GNAL	10 x 50	18 p11	G protein subunit alpha L [Source:HGNC Symbol;Acc:HGNC:4388]
212698_s_at	2010-09-01	7 x 50	2 q13	septin 10 [Source:HGNC Symbol;Acc:HGNC:14349]
219700_at	PLXDC1	7 x 49	17 q12	plexin domain containing 1 [Source:HGNC Symbol;Acc:HGNC:20945]
212875_s_at	C2CD2	10 x 50	21 q22	C2 calcium dependent domain containing 2 [Source:HGNC Symbol;Acc:HGNC:1266]
219213_at	JAM2	8 x 48	21 q21	junctional adhesion molecule 2 [Source:HGNC Symbol;Acc:HGNC:14686]
212086_x_at	LMNA	7 x 48	1 q22	lamin A/C [Source:HGNC Symbol;Acc:HGNC:6636]
202524_s_at	SPOCK2	12 x 49	10 q22	SPARC/osteonectin, cwcv and kazal like domains proteoglycan 2 [Source:HGNC Symbol;Acc:HGNC:13564]
209881_s_at		12 x 48	16 p11
204472_at	GEM	7 x 50	8 q22	GTP binding protein overexpressed in skeletal muscle [Source:HGNC Symbol;Acc:HGNC:4234]
213193_x_at		11 x 49	7 q34	T-cell receptor beta constant 1 [Source:HGNC Symbol;Acc:HGNC:12156]
219091_s_at	MMRN2	8 x 50	10 q23	multimerin 2 [Source:HGNC Symbol;Acc:HGNC:19888]
219528_s_at	BCL11B	11 x 49	14 q32	B-cell CLL/lymphoma 11B [Source:HGNC Symbol;Acc:HGNC:13222]
210915_x_at		11 x 49	7 q34	T-cell receptor beta constant 1 [Source:HGNC Symbol;Acc:HGNC:12156]
203058_s_at	PAPSS2	7 x 48	10 q23	3'-phosphoadenosine 5'-phosphosulfate synthase 2 [Source:HGNC Symbol;Acc:HGNC:8604]
204563_at	SELL	12 x 48	1 q24	selectin L [Source:HGNC Symbol;Acc:HGNC:10720]
204482_at	CLDN5	9 x 50	22 q11	claudin 5 [Source:HGNC Symbol;Acc:HGNC:2047]
203387_s_at	TBC1D4	12 x 48	13 q22	TBC1 domain family member 4 [Source:HGNC Symbol;Acc:HGNC:19165]
221942_s_at	GUCY1A3	8 x 49	4 q32	guanylate cyclase 1 soluble subunit alpha [Source:HGNC Symbol;Acc:HGNC:4685]
211126_s_at	CSRP2	9 x 50	12 q21	cysteine and glycine rich protein 2 [Source:HGNC Symbol;Acc:HGNC:2470]
208161_s_at	ABCC3	9 x 50	17 q21	ATP binding cassette subfamily C member 3 [Source:HGNC Symbol;Acc:HGNC:54]
213169_at	SEMA5A	9 x 50	5 p15	semaphorin 5A [Source:HGNC Symbol;Acc:HGNC:10736]
206331_at	CALCRL	7 x 50	2 q32	calcitonin receptor like receptor [Source:HGNC Symbol;Acc:HGNC:16709]
213194_at	ROBO1	8 x 48	3 p12	roundabout guidance receptor 1 [Source:HGNC Symbol;Acc:HGNC:10249]
210605_s_at	MFGE8	7 x 48	15 q26	milk fat globule-EGF factor 8 protein [Source:HGNC Symbol;Acc:HGNC:7036]
209147_s_at	PLPP1	7 x 50	5 q11	phospholipid phosphatase 1 [Source:HGNC Symbol;Acc:HGNC:9228]
202668_at	EFNB2	8 x 50	13 q33	ephrin B2 [Source:HGNC Symbol;Acc:HGNC:3227]
202208_s_at	ARL4C	11 x 48	2 q37	ADP ribosylation factor like GTPase 4C [Source:HGNC Symbol;Acc:HGNC:698]
204037_at	LPAR1	10 x 50	9 q31	lysophosphatidic acid receptor 1 [Source:HGNC Symbol;Acc:HGNC:3166]
202206_at	ARL4C	11 x 48	2 q37	ADP ribosylation factor like GTPase 4C [Source:HGNC Symbol;Acc:HGNC:698]
212463_at		7 x 48
210946_at	PLPP1	7 x 50	5 q11	phospholipid phosphatase 1 [Source:HGNC Symbol;Acc:HGNC:9228]
213958_at	CD6	12 x 49	11 q12	CD6 molecule [Source:HGNC Symbol;Acc:HGNC:1691]
210038_at	PRKCQ	11 x 48	10 p15	protein kinase C theta [Source:HGNC Symbol;Acc:HGNC:9410]
218856_at	TNFRSF21	7 x 50	6 p12	TNF receptor superfamily member 21 [Source:HGNC Symbol;Acc:HGNC:13469]
202207_at	ARL4C	11 x 48	2 q37	ADP ribosylation factor like GTPase 4C [Source:HGNC Symbol;Acc:HGNC:698]
201427_s_at	SELENOP	7 x 50	5 p12	selenoprotein P [Source:HGNC Symbol;Acc:HGNC:10751]
218656_s_at	LHFP	7 x 50	13 q14	lipoma HMGIC fusion partner [Source:HGNC Symbol;Acc:HGNC:6586]
219315_s_at	TMEM204	8 x 48	16 p13	transmembrane protein 204 [Source:HGNC Symbol;Acc:HGNC:14158]
216033_s_at	FYN	11 x 48	6 q21	FYN proto-oncogene, Src family tyrosine kinase [Source:HGNC Symbol;Acc:HGNC:4037]
211796_s_at		11 x 49	7 q34	T-cell receptor beta constant 1 [Source:HGNC Symbol;Acc:HGNC:12156]
205255_x_at	TCF7	12 x 49	5 q31	transcription factor 7 (T-cell specific, HMG-box) [Source:HGNC Symbol;Acc:HGNC:11639]
218764_at	PRKCH	11 x 49	14 q23	protein kinase C eta [Source:HGNC Symbol;Acc:HGNC:9403]
212195_at	IL6ST	9 x 48	5 q11	interleukin 6 signal transducer [Source:HGNC Symbol;Acc:HGNC:6021]

## Sheet: Module J
ID	Symbol	Metagene	Chromosome	Description
209800_at	KRT16	18 x 50	17 q21	keratin 16 [Source:HGNC Symbol;Acc:HGNC:6423]
209351_at	KRT14	18 x 50	17 q21	keratin 14 [Source:HGNC Symbol;Acc:HGNC:6416]
220090_at	CRNN	18 x 50	1 q21	cornulin [Source:HGNC Symbol;Acc:HGNC:1230]
207935_s_at	KRT13	18 x 50	17 q21	keratin 13 [Source:HGNC Symbol;Acc:HGNC:6415]
218990_s_at	SPRR3	18 x 50	1 q21	small proline rich protein 3 [Source:HGNC Symbol;Acc:HGNC:11268]
213240_s_at	KRT4	18 x 50	12 q13	keratin 4 [Source:HGNC Symbol;Acc:HGNC:6441]
213796_at	SPRR1A	18 x 50	1 q21	small proline rich protein 1A [Source:HGNC Symbol;Acc:HGNC:11259]
203691_at	PI3	18 x 50	20 q13	peptidase inhibitor 3 [Source:HGNC Symbol;Acc:HGNC:8947]
204379_s_at	FGFR3	18 x 50	4 p16	fibroblast growth factor receptor 3 [Source:HGNC Symbol;Acc:HGNC:3690]
213680_at	KRT6B	18 x 50	12 q13	keratin 6B [Source:HGNC Symbol;Acc:HGNC:6444]
205064_at	SPRR1B	18 x 50	1 q21	small proline rich protein 1B [Source:HGNC Symbol;Acc:HGNC:11260]
41469_at	PI3	18 x 50	20 q13	peptidase inhibitor 3 [Source:HGNC Symbol;Acc:HGNC:8947]
209125_at	KRT6A	18 x 50	12 q13	keratin 6A [Source:HGNC Symbol;Acc:HGNC:6443]
202286_s_at	TACSTD2	18 x 50	1 p32	tumor-associated calcium signal transducer 2 [Source:HGNC Symbol;Acc:HGNC:11530]
219554_at	RHCG	18 x 50	15 q26	Rh family C glycoprotein [Source:HGNC Symbol;Acc:HGNC:18140]
214549_x_at	SPRR1A	18 x 50	1 q21	small proline rich protein 1A [Source:HGNC Symbol;Acc:HGNC:11259]
205916_at	S100A7A	18 x 50	1 q21	S100 calcium binding protein A7A [Source:HGNC Symbol;Acc:HGNC:21657]
209126_x_at	KRT6B	18 x 50	12 q13	keratin 6B [Source:HGNC Symbol;Acc:HGNC:6444]
204268_at	S100A2	18 x 50	1 q21	S100 calcium binding protein A2 [Source:HGNC Symbol;Acc:HGNC:10492]
211002_s_at	TRIM29	18 x 50	11 q23	tripartite motif containing 29 [Source:HGNC Symbol;Acc:HGNC:17274]
201650_at	KRT15	18 x 50	17 q21	keratin 15 [Source:HGNC Symbol;Acc:HGNC:6421]
201820_at	KRT5	18 x 50	12 q13	keratin 5 [Source:HGNC Symbol;Acc:HGNC:6442]
206276_at	LY6D	18 x 50	8 q24	lymphocyte antigen 6 family member D [Source:HGNC Symbol;Acc:HGNC:13348]
204351_at	S100P	18 x 50	4 p16	S100 calcium binding protein P [Source:HGNC Symbol;Acc:HGNC:10504]
216560_x_at		14 x 50	22 q11	immunoglobulin lambda variable 3-10 [Source:HGNC Symbol;Acc:HGNC:5897]
215777_at		15 x 50	22 q11	immunoglobulin lambda variable 4-60 [Source:HGNC Symbol;Acc:HGNC:5920]
215118_s_at		15 x 50	14 q32
206004_at	TGM3	18 x 50	20 p13	transglutaminase 3 [Source:HGNC Symbol;Acc:HGNC:11779]
210020_x_at	CALML3	18 x 50	10 p15	calmodulin like 3 [Source:HGNC Symbol;Acc:HGNC:1452]
204623_at	TFF3	16 x 47	21 q22	trefoil factor 3 [Source:HGNC Symbol;Acc:HGNC:11757]
218677_at	S100A14	18 x 50	1 q21	S100 calcium binding protein A14 [Source:HGNC Symbol;Acc:HGNC:18901]
205185_at	SPINK5	18 x 50	5 q32	serine peptidase inhibitor, Kazal type 5 [Source:HGNC Symbol;Acc:HGNC:15464]
215035_at		15 x 50
206884_s_at	SCEL	18 x 50	13 q22	sciellin [Source:HGNC Symbol;Acc:HGNC:10573]
205595_at	DSG3	18 x 50	18 q12	desmoglein 3 [Source:HGNC Symbol;Acc:HGNC:3050]
214777_at		14 x 50	2 p11	immunoglobulin kappa variable 4-1 [Source:HGNC Symbol;Acc:HGNC:5834]
211633_x_at		14 x 50
204614_at	SERPINB2	18 x 50	18 q21	serpin family B member 2 [Source:HGNC Symbol;Acc:HGNC:8584]
203407_at	PPL	18 x 50	16 p13	periplakin [Source:HGNC Symbol;Acc:HGNC:9273]
202489_s_at	FXYD3	18 x 50	19 q13	FXYD domain containing ion transport regulator 3 [Source:HGNC Symbol;Acc:HGNC:4027]
216573_at		15 x 50
211548_s_at	HPGD	16 x 49	4 q34	hydroxyprostaglandin dehydrogenase 15-(NAD) [Source:HGNC Symbol;Acc:HGNC:5154]
217258_x_at		14 x 50
217744_s_at	PERP	18 x 50	6 q23	PERP, TP53 apoptosis effector [Source:HGNC Symbol;Acc:HGNC:17637]
203453_at	SCNN1A	18 x 50	12 p13	sodium channel epithelial 1 alpha subunit [Source:HGNC Symbol;Acc:HGNC:10599]
207717_s_at	PKP2	17 x 48	12 p11	plakophilin 2 [Source:HGNC Symbol;Acc:HGNC:9024]
217179_x_at		15 x 50
205476_at	CCL20	16 x 50	2 q36	C-C motif chemokine ligand 20 [Source:HGNC Symbol;Acc:HGNC:10619]
211643_x_at		14 x 50
216491_x_at		14 x 50	14 q32	immunoglobulin heavy variable 4-61 [Source:HGNC Symbol;Acc:HGNC:5655]
201287_s_at	SDC1	18 x 50	2 p24	syndecan 1 [Source:HGNC Symbol;Acc:HGNC:10658]
217198_x_at		15 x 50
211655_at		15 x 50
216430_x_at		15 x 50
211372_s_at	IL1R2	18 x 49	2 q11	interleukin 1 receptor type 2 [Source:HGNC Symbol;Acc:HGNC:5994]
200606_at	DSP	16 x 50	6 p24	desmoplakin [Source:HGNC Symbol;Acc:HGNC:3052]
211639_x_at		15 x 50	14 q32	immunoglobulin heavy variable 4-34 [Source:HGNC Symbol;Acc:HGNC:5650]
202935_s_at	SOX9	17 x 48	17 q24	SRY-box 9 [Source:HGNC Symbol;Acc:HGNC:11204]
201428_at	CLDN4	18 x 50	7 q11	claudin 4 [Source:HGNC Symbol;Acc:HGNC:2046]
216853_x_at		15 x 50	22 q11	immunoglobulin lambda variable 3-19 [Source:HGNC Symbol;Acc:HGNC:5903]
212730_at	SYNM	15 x 47	15 q26	synemin [Source:HGNC Symbol;Acc:HGNC:24466]
214768_x_at		14 x 50	2 p11	immunoglobulin kappa variable 2-28 [Source:HGNC Symbol;Acc:HGNC:5783]
209373_at	MALL	18 x 50	2 q13	mal, T-cell differentiation protein like [Source:HGNC Symbol;Acc:HGNC:6818]
217281_x_at		14 x 50	14 q32	immunoglobulin heavy variable 3-7 [Source:HGNC Symbol;Acc:HGNC:5620]
216365_x_at		15 x 50
211908_x_at		14 x 50
216576_x_at		14 x 50
215214_at		14 x 50	22 q11	immunoglobulin lambda variable 3-25 [Source:HGNC Symbol;Acc:HGNC:5908]
216412_x_at		15 x 50
211597_s_at	HOPX	14 x 50	4 q12	HOP homeobox [Source:HGNC Symbol;Acc:HGNC:24961]
216401_x_at		14 x 50	2 p11	immunoglobulin kappa variable 1-37 (non-functional) [Source:HGNC Symbol;Acc:HGNC:5739]
201596_x_at	KRT18	17 x 49	12 q13	keratin 18 [Source:HGNC Symbol;Acc:HGNC:6430]
202504_at	TRIM29	18 x 50	11 q23	tripartite motif containing 29 [Source:HGNC Symbol;Acc:HGNC:17274]
219496_at	SOWAHC	17 x 48	2 q13	sosondowah ankyrin repeat domain family member C [Source:HGNC Symbol;Acc:HGNC:26149]
203962_s_at	NEBL	18 x 50	10 p12	nebulette [Source:HGNC Symbol;Acc:HGNC:16932]
219529_at	CLIC3	18 x 50	9 q34	chloride intracellular channel 3 [Source:HGNC Symbol;Acc:HGNC:2064]
203726_s_at	LAMA3	17 x 48	18 q11	laminin subunit alpha 3 [Source:HGNC Symbol;Acc:HGNC:6483]
216829_at		15 x 50
204751_x_at	DSC2	18 x 50	18 q12	desmocollin 2 [Source:HGNC Symbol;Acc:HGNC:3036]
211644_x_at		14 x 50	2 p11	immunoglobulin kappa variable 3-20 [Source:HGNC Symbol;Acc:HGNC:5817]
211635_x_at		14 x 50	14 q32	immunoglobulin heavy variable 1-69 [Source:HGNC Symbol;Acc:HGNC:5558]
216557_x_at		14 x 50	14 q32	immunoglobulin heavy variable 3-21 [Source:HGNC Symbol;Acc:HGNC:5586]
211634_x_at		14 x 50	14 q32	immunoglobulin heavy variable 1-69 [Source:HGNC Symbol;Acc:HGNC:5558]
211637_x_at		14 x 50	14 q32	immunoglobulin heavy variable 4-61 [Source:HGNC Symbol;Acc:HGNC:5655]
40665_at	FMO3	16 x 47	1 q24	flavin containing monooxygenase 3 [Source:HGNC Symbol;Acc:HGNC:3771]
217148_x_at		14 x 50	22 q11	immunoglobulin lambda variable 2-14 [Source:HGNC Symbol;Acc:HGNC:5888]
211798_x_at		14 x 50
214973_x_at		14 x 50
217227_x_at		15 x 50
217378_x_at		14 x 50	2 q14	immunoglobulin kappa variable 1/OR2-108 (non-functional) [Source:HGNC Symbol;Acc:HGNC:5767]
204485_s_at	COX11	16 x 48	17 q22	target of myb1 like 1 membrane trafficking protein [Source:HGNC Symbol;Acc:HGNC:11983]
203397_s_at	GALNT3	16 x 50	2 q24	polypeptide N-acetylgalactosaminyltransferase 3 [Source:HGNC Symbol;Acc:HGNC:4125]
216510_x_at		14 x 50
216541_x_at		15 x 50
202890_at	MAP7	17 x 48	6 q23	microtubule associated protein 7 [Source:HGNC Symbol;Acc:HGNC:6869]
211640_x_at		15 x 50
217145_at		15 x 50
203914_x_at	HPGD	16 x 49	4 q34	hydroxyprostaglandin dehydrogenase 15-(NAD) [Source:HGNC Symbol;Acc:HGNC:5154]
211649_x_at		14 x 50
217360_x_at		15 x 50
203913_s_at	HPGD	16 x 48	4 q34	hydroxyprostaglandin dehydrogenase 15-(NAD) [Source:HGNC Symbol;Acc:HGNC:5154]
211650_x_at		14 x 50	14 q32	immunoglobulin heavy variable 3-23 [Source:HGNC Symbol;Acc:HGNC:5588]
211549_s_at	HPGD	17 x 48	4 q34	hydroxyprostaglandin dehydrogenase 15-(NAD) [Source:HGNC Symbol;Acc:HGNC:5154]
217320_at		15 x 50	14 q32	immunoglobulin heavy variable 3-72 [Source:HGNC Symbol;Acc:HGNC:5622]
211641_x_at		14 x 50
203499_at	EPHA2	17 x 48	1 p36	EPH receptor A2 [Source:HGNC Symbol;Acc:HGNC:3386]
200635_s_at	PTPRF	17 x 49	1 p34	protein tyrosine phosphatase, receptor type F [Source:HGNC Symbol;Acc:HGNC:9670]
219014_at	PLAC8	14 x 50	4 q21	placenta specific 8 [Source:HGNC Symbol;Acc:HGNC:19254]
216984_x_at		14 x 50
220945_x_at	MANSC1	16 x 49	12 p13	MANSC domain containing 1 [Source:HGNC Symbol;Acc:HGNC:25505]
211881_x_at		14 x 50
217384_x_at		15 x 50
202936_s_at	SOX9	16 x 48	17 q24	SRY-box 9 [Source:HGNC Symbol;Acc:HGNC:11204]
217157_x_at		14 x 50
39248_at	AQP3	18 x 50	9 p13	aquaporin 3 (Gill blood group) [Source:HGNC Symbol;Acc:HGNC:636]
211638_at		15 x 50
220646_s_at	KLRF1	14 x 47	12 p13	killer cell lectin like receptor F1 [Source:HGNC Symbol;Acc:HGNC:13342]
206385_s_at	ANK3	16 x 48	10 q21	ankyrin 3 [Source:HGNC Symbol;Acc:HGNC:494]
217235_x_at		14 x 50
215949_x_at		14 x 50	14 q32	immunoglobulin heavy variable 3-33 [Source:HGNC Symbol;Acc:HGNC:5596]
211642_at		15 x 50	14 q32	immunoglobulin heavy variable 3-73 [Source:HGNC Symbol;Acc:HGNC:5623]
211868_x_at		15 x 50
214916_x_at		14 x 50
214203_s_at	PRODH	17 x 47	22 q11	proline dehydrogenase 1 [Source:HGNC Symbol;Acc:HGNC:9453]
217480_x_at		14 x 50	9 p11	immunoglobulin kappa variable 1/OR9-2 (pseudogene) [Source:HGNC Symbol;Acc:HGNC:49466]
217236_x_at		15 x 50
217084_at		15 x 50
216207_x_at		14 x 50	2 p11	immunoglobulin kappa variable 1-13 (gene/pseudogene) [Source:HGNC Symbol;Acc:HGNC:5731]
216558_x_at		15 x 50
214279_s_at	NDRG2	16 x 48	14 q11	NDRG family member 2 [Source:HGNC Symbol;Acc:HGNC:14460]
202342_s_at	TRIM2	17 x 47	4 q31	tripartite motif containing 2 [Source:HGNC Symbol;Acc:HGNC:15974]
221004_s_at	ITM2C	14 x 49	2 q37	integral membrane protein 2C [Source:HGNC Symbol;Acc:HGNC:6175]
209679_s_at	SMAGP	16 x 48	12 q13	small cell adhesion glycoprotein [Source:HGNC Symbol;Acc:HGNC:26918]
217022_s_at		14 x 50	14 q32	immunoglobulin heavy constant alpha 2 (A2m marker) [Source:HGNC Symbol;Acc:HGNC:5479]
218552_at	ECHDC2	14 x 47	1 p32	enoyl-CoA hydratase domain containing 2 [Source:HGNC Symbol;Acc:HGNC:23408]
205624_at	CPA3	16 x 48	3 q24	carboxypeptidase A3 [Source:HGNC Symbol;Acc:HGNC:2298]
209108_at	TSPAN6	17 x 48	X q22	tetraspanin 6 [Source:HGNC Symbol;Acc:HGNC:11858]
206496_at	FMO3	16 x 47	1 q24	flavin containing monooxygenase 3 [Source:HGNC Symbol;Acc:HGNC:3771]
204343_at	ABCA3	15 x 47	16 p13	ATP binding cassette subfamily A member 3 [Source:HGNC Symbol;Acc:HGNC:33]
211645_x_at		14 x 50	2 p11	immunoglobulin kappa variable 1-17 [Source:HGNC Symbol;Acc:HGNC:5733]
204341_at	TRIM16L	17 x 48	17 p11	tripartite motif containing 16-like [Source:HGNC Symbol;Acc:HGNC:32670]
216517_at		15 x 50	2 p11	immunoglobulin kappa variable 1D-8 [Source:HGNC Symbol;Acc:HGNC:5759]
215176_x_at		14 x 50	2 p11	immunoglobulin kappa variable 1-39 (gene/pseudogene) [Source:HGNC Symbol;Acc:HGNC:5740]
203256_at	CDH3	17 x 49	16 q22	cadherin 3 [Source:HGNC Symbol;Acc:HGNC:1762]
216542_x_at		15 x 50	14 q32	immunoglobulin heavy variable 3-20 [Source:HGNC Symbol;Acc:HGNC:5585]
204019_s_at	SH3YL1	15 x 48	2 p25	SH3 and SYLF domain containing 1 [Source:HGNC Symbol;Acc:HGNC:29546]
217239_x_at		15 x 50	14 q32	immunoglobulin heavy variable 3-47 (pseudogene) [Source:HGNC Symbol;Acc:HGNC:5605]
209506_s_at	NR2F1	15 x 47	5 q15	nuclear receptor subfamily 2 group F member 1 [Source:HGNC Symbol;Acc:HGNC:7975]
205016_at	TGFA	16 x 48	2 p13	transforming growth factor alpha [Source:HGNC Symbol;Acc:HGNC:11765]
214669_x_at		14 x 50
201367_s_at	ZFP36L2	14 x 47	2 p21	ZFP36 ring finger protein like 2 [Source:HGNC Symbol;Acc:HGNC:1108]
206453_s_at	NDRG2	16 x 48	14 q11	NDRG family member 2 [Source:HGNC Symbol;Acc:HGNC:14460]
203080_s_at	BAZ2B	15 x 47	2 q24	bromodomain adjacent to zinc finger domain 2B [Source:HGNC Symbol;Acc:HGNC:963]
202267_at	LAMC2	17 x 47	1 q25	laminin subunit gamma 2 [Source:HGNC Symbol;Acc:HGNC:6493]
214085_x_at	GLIPR1	14 x 47	12 q21	GLI pathogenesis related 1 [Source:HGNC Symbol;Acc:HGNC:17001]
214836_x_at		15 x 50
215379_x_at		15 x 50	22 q11	immunoglobulin lambda constant 2 [Source:HGNC Symbol;Acc:HGNC:5856]
211430_s_at		14 x 50	14 q32	immunoglobulin heavy constant gamma P (non-functional) [Source:HGNC Symbol;Acc:HGNC:5529]
211647_x_at		15 x 50
201010_s_at	TXNIP	14 x 47	1 q21	thioredoxin interacting protein [Source:HGNC Symbol;Acc:HGNC:16952]
215121_x_at		15 x 50	22 q11	immunoglobulin lambda constant 2 [Source:HGNC Symbol;Acc:HGNC:5856]
209138_x_at		15 x 50	22 q11	immunoglobulin lambda constant 2 [Source:HGNC Symbol;Acc:HGNC:5856]
217979_at	TSPAN13	15 x 47	7 p21	tetraspanin 13 [Source:HGNC Symbol;Acc:HGNC:21643]
214677_x_at	IGLL5	15 x 50	22 q11	immunoglobulin lambda like polypeptide 5 [Source:HGNC Symbol;Acc:HGNC:38476]
221671_x_at		14 x 50	2 p11	immunoglobulin kappa constant [Source:HGNC Symbol;Acc:HGNC:5716]
221651_x_at		14 x 50	2 p11	immunoglobulin kappa constant [Source:HGNC Symbol;Acc:HGNC:5716]

[truncated: 3 more sheets: Module K, Module L, Module M]
